# Supplementary material for: Synthesis of difluoromethyl carbinols from the Friedel–Crafts reaction of electron-rich arenes with difluorovinyl arylsulfonates
Source: Royal Society of Chemistry journal article supplement (doi:10.1039/d2qo01277d), 2022-01-01

*Supporting Information*

**Synthesis of Difluoromethyl Carbinols from the Friedel-Crafts Reaction of Electron-rich Arenes with Difluorovinyl Arylsulfonates**

Xiaojia Cai <sup>[a]</sup>, Jinyuan Xu <sup>[a]</sup>, Xueli Cui <sup>[a]</sup>, Jing Qu <sup>[a]</sup>, Weiqiang Sun <sup>[a]</sup>, Jinhui Hu <sup>[a]</sup>,  
Shuwen Zhao <sup>[a]</sup>, Wen-Hua Chen <sup>\*[a]</sup>, Hongliang Li <sup>\*[b]</sup> and Jia-Qiang Wu <sup>\*[a]</sup>

[a] School of Biotechnology and Health Sciences, Wuyi University, Jiangmen, 529020, China

[b] School of Medicine, Yunnan University, Kunming, 650091, China

\*Email: wyuchemwjq@wyu.edu.cn, whchen@wyu.edu.cn, lihongliang@ynu.edu.cn .

## Table of Contents

|                                                                                                  |    |
|--------------------------------------------------------------------------------------------------|----|
| General Information .....                                                                        | 1  |
| 1 Synthesis of Starting Materials .....                                                          | 2  |
| 1.1 Synthesis of 2,2-Difluorovinyl arylsulfonates <b>2</b> .....                                 | 2  |
| 1.2 Synthesis of 2,2-Difluorovinyl-1-D 4-(trifluoromethyl)benzenesulfonate...2                   |    |
| 2 General Procedure for Synthesis of Difluoromethyl Carbinols .....                              | 3  |
| 3 Characterization of Products .....                                                             | 5  |
| 4 Gram-scale Synthesis of product <b>3b</b> .....                                                | 27 |
| 5 Derivatization of product 3b and Characterization Data of Compounds <b>9-13</b> .<br>.....     | 28 |
| 5.1 Compound <b>9</b> .....                                                                      | 28 |
| 5.2 Compound <b>10</b> .....                                                                     | 28 |
| 5.3 Compound <b>11</b> .....                                                                     | 29 |
| 5.4 Compound <b>12</b> .....                                                                     | 30 |
| 5.5 Compound <b>13</b> .....                                                                     | 31 |
| 6 Mechanism Study.....                                                                           | 32 |
| 6.1 Free radical inhibition experiment .....                                                     | 32 |
| 6.2 Reaction solvent screening.....                                                              | 32 |
| 6.3 Effect of trifluoroethanol.....                                                              | 33 |
| 6.4 Deuterium experiment.....                                                                    | 34 |
| 6.5 Capture of active difluoroacetaldehyde intermediate .....                                    | 36 |
| 7 References .....                                                                               | 39 |
| 8 <sup>1</sup> H, <sup>13</sup> C and <sup>19</sup> F NMR Spectra of Synthesized Compounds ..... | 40 |

## General Information

The solvents were dried by distillation over the drying agents indicated in parentheses: THF (Na-benzophenone). Trifluoroethanol, Anhydrous dichloromethane, EtOH were purchased from Adamas-beta. Commercially available chemicals were obtained from commercial suppliers and used without further purification unless otherwise stated.

NMR-spectra were recorded on Bruker AvanceIII-500M in solvents as indicate. Chemical shifts ( $\delta$ ) are given in ppm relative to tetramethylsilane ( $\delta = 0$ ). The residual solvent signals were used as references and the chemical shifts converted to the TMS scale ( $\text{CDCl}_3$ :  $\delta\text{H} = 7.26$  ppm,  $\delta\text{C} = 77.16$  ppm;  $\text{CD}_3\text{OD}$ :  $\delta\text{H} = 3.31$  ppm,  $\delta\text{C} = 49.00$  ppm;  $(\text{CD}_3)_2\text{SO}$ :  $\delta\text{H} = 2.49$  ppm,  $\delta\text{C} = 39.52$  ppm;). The following abbreviations were used to describe peak splitting patterns: s (singlet), d (doublet), t (triplet), q (quartet), m (multiplet), dd (doublet of doublets), td (triplet of doublets), ddd (doublet of doublet of doublets). Coupling constants (J) were reported in hertz unit (Hz) High-resolution mass spectra (HRMS) were recorded on a BRUKER VPEXII spectrometer with EI and ESI mode unless otherwise stated.

Analytical thin layer chromatography was performed on Polygram SIL G/UV<sub>254</sub> plates. Visualization was accomplished with short wave UV light, or  $\text{KMnO}_4$  staining solutions followed by heating. Flash column chromatography was performed using silica gel (200-300 mesh) with solvents distilled prior to use.

No attempts were made to optimize yields for substrate synthesis

# 1 Synthesis of Starting Materials

## 1.1 Synthesis of 2,2-Difluorovinyl arylsulfonates **2**

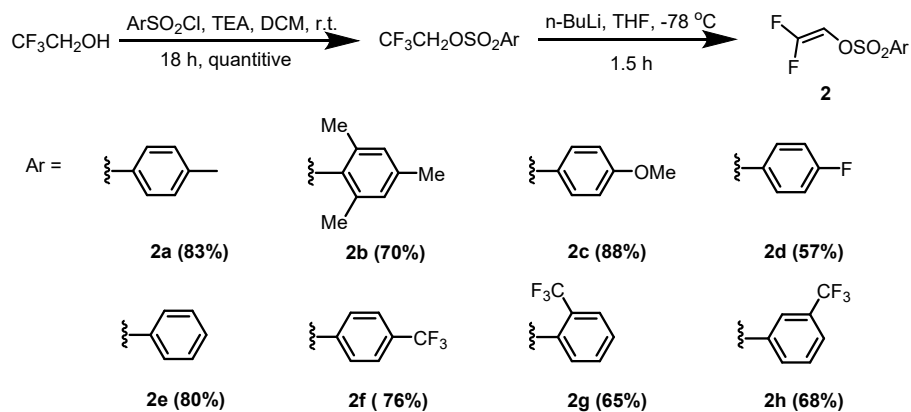

The title compound was prepared according to a known procedure.<sup>1</sup>

## 1.2 Synthesis of 2,2-Difluorovinyl-1-D 4-(trifluoromethyl)benzenesulfonate

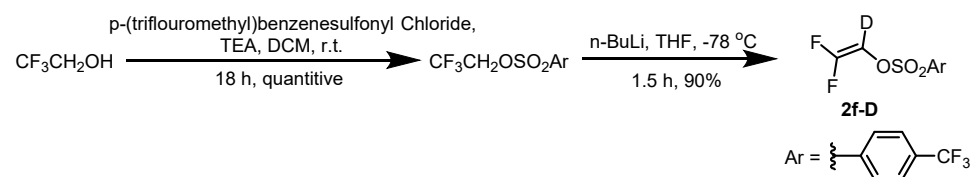

The synthetic method of the title compound is the same as that of compound **2**, but after the final drop of n-BuLi, it is quenched with D<sub>2</sub>O instead of H<sub>2</sub>O.

## 2 General Procedure for Synthesis of Difluoromethyl Carbinols

### General procedure A:

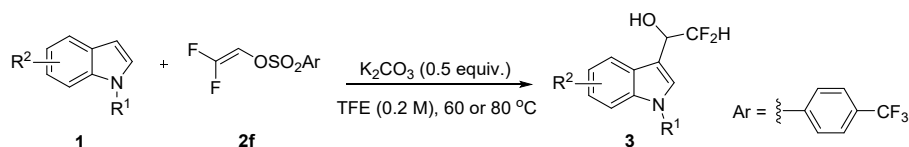

In an oven-dried Pressure tube, a mixture of Indoles **1** (0.2 mmol, 1.0 equiv), 2,2-Difluorovinyl 4-(trifluoromethyl)benzenesulfonate **2f** (115.3 mg, 0.4 mmol, 2 equiv),  $K_2CO_3$  (13.8 mg, 0.1 mmol, 0.5 equiv) in TFE (1 ml) was stirred at 60 °C or 80 °C for 16 h. The reaction mixture was then diluted with Ethyl acetate (10 ml) and washed with brine. The aqueous phase was extracted with Ethyl acetate. The organic layers were combined, washed with brine and dried over  $Na_2SO_4$ . The solvent was removed in vacuo, and the residue was purified by column chromatography (PE/EA) to afford the desired product **3**.

### General procedure B:

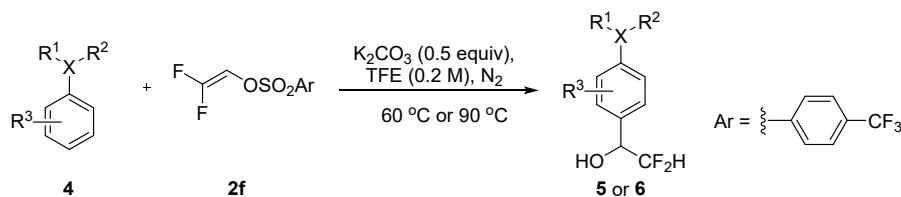

In an oven-dried Pressure tube, a mixture of Phenyl **4** (0.2 mmol, 1.0 equiv), 2,2-Difluorovinyl 4-(trifluoromethyl)benzenesulfonate **2f** (115.3 mg, 0.4 mmol, 2 equiv),  $K_2CO_3$  (13.8 mg, 0.1 mmol, 0.5 equiv) in TFE (1 ml) was stirred at 60-90 °C Under nitrogen protection for 16 h. The reaction mixture was then diluted with ethyl acetate (10 ml) and washed with brine. The aqueous phase was extracted with Ethyl acetate. The organic layers were combined, washed with brine and dried over  $Na_2SO_4$ . The solvent was removed in vacuo, and the residue was purified by column chromatography (PE/EA) to afford the desired product **5 or 6**.

### General procedure C:

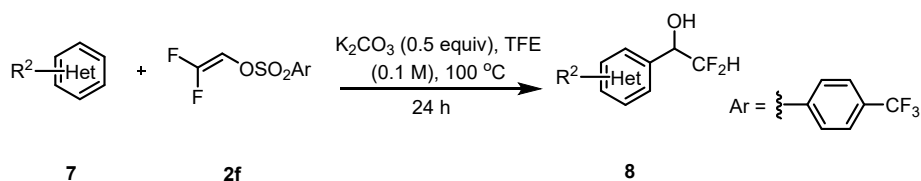

In an oven-dried Pressure tube, a mixture of Heteroarenyl **7** (0.2 mmol, 1.0

equiv), 2,2-Difluorovinyl 4-(trifluoromethyl)benzenesulfonate **2f** (115.3 mg, 0.4 mmol, 2 equiv), K<sub>2</sub>CO<sub>3</sub> (13.8 mg, 0.1 mmol, 0.5 equiv) in TFE (2 ml) was stirred at 100 °C for 24 h. The reaction mixture was then diluted with ethyl acetate (10 ml) and washed with brine. The aqueous phase was extracted with Ethyl acetate. The organic layers were combined, washed with brine and dried over Na<sub>2</sub>SO<sub>4</sub>. The solvent was removed in vacuo, and the residue was purified by column chromatography (PE/EA) to afford the desired product **8**.

### 3 Characterization of Products

#### 2,2-Difluoro-1-(1H-indol-3-yl)ethan-1-ol (3a)

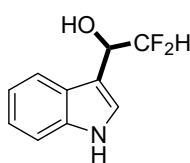

Following general procedure A at the temperature of 60 °C, the title compound was afforded as a brown oil (35.8 mg, 91%). TLC (PE: EA, 2:1 v/v):  $R_f$  = 0.5;  $^1\text{H}$  NMR (500 MHz, Chloroform-*d*)  $\delta$  8.30 (s, 1H), 7.72 (d,  $J$  = 7.9 Hz, 1H), 7.38 (d,  $J$  = 8.2 Hz, 1H), 7.25 (s, 1H), 7.24 (t,  $J$  = 7.5 Hz, 1H), 7.17 (t,  $J$  = 7.5 Hz, 1H), 6.00 (td,  $J$  = 56.0, 4.3 Hz, 1H), 5.17-5.11 (m, 1H), 2.45 (d,  $J$  = 4.2 Hz, 1H).  $^{13}\text{C}$  NMR (125 MHz, Chloroform-*d*)  $\delta$  137.2, 128.0, 126.5, 122.5, 120.1, 119.5, 115.8 (t,  $J$  = 245.0 Hz), 109.8, 68.3 (t,  $J$  = 25.4 Hz), 33.0.  $^{19}\text{F}$  NMR (470 MHz, Chloroform-*d*)  $\delta$  -126.10 (ddd,  $J$  = 282.3, 55.8, 10.0 Hz), -127.32 (ddd,  $J$  = 281.6, 56.4, 11.6 Hz). **HRMS (ESI):** calcd for  $\text{C}_{10}\text{H}_8\text{F}_2\text{NO}$  [ $\text{M} + \text{H}$ ]: 196.0568, found: 196.0559.

#### 2,2-Difluoro-1-(1-methyl-1H-indol-3-yl)ethan-1-ol (3b)

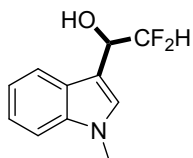

Following general procedure A at the temperature of 60 °C to afford the title compound as a yellow oil (36.7 mg, 87%). TLC (PE: EA, 4:1 v/v):  $R_f$  = 0.3;  $^1\text{H}$  NMR (500 MHz, Chloroform-*d*)  $\delta$  7.71 (d,  $J$  = 8.0 Hz, 1H), 7.34 (d,  $J$  = 8.2 Hz, 1H), 7.27 (td,  $J$  = 7.5, 1.0 Hz, 1H), 7.16 (td,  $J$  = 7.4, 1.0 Hz, 1H), 7.16 (s, 1H), 5.98 (td,  $J$  = 56.1, 4.5 Hz, 1H), 5.15-5.10 (m, 1H), 3.78 (s, 3H), 2.34 (s, 1H).  $^{13}\text{C}$  NMR (125 MHz, Chloroform-*d*)  $\delta$  137.0, 127.9, 126.4, 122.3, 119.9, 119.4, 115.7 (t,  $J$  = 244.7 Hz), 109.6, 109.6 (t,  $J$  = 3.4 Hz), 68.1 (t,  $J$  = 25.2 Hz), 32.9.  $^{19}\text{F}$  NMR (470 MHz, Chloroform-*d*)  $\delta$  -126.17 (ddd,  $J$  = 282.5, 56.7, 10.0 Hz), -127.21 (ddd,  $J$  = 282.5, 57.4, 12.1 Hz). **HRMS (ESI):** calcd for  $\text{C}_{11}\text{H}_{12}\text{F}_2\text{NO}$  [ $\text{M} + \text{H}$ ] $^+$ : 212.0881, found: 212.0878.

#### 2,2-Difluoro-1-(1-phenyl-1H-indol-3-yl)ethan-1-ol (3c)

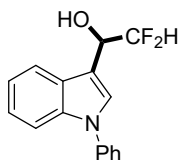

Following general procedure A at the temperature of 60 °C to afford the title compound as a yellow oil (48.6 mg, 89%). TLC (PE: EA, 4:1 v/v):  $R_f$  = 0.5;  $^1\text{H}$  NMR (500 MHz, Chloroform-*d*)  $\delta$  7.78 (d,  $J$  = 7.9 Hz, 1H), 7.56-7.48 (m, 5H), 7.45 (s, 1H), 7.39 (t,  $J$  = 7.1 Hz, 1H), 7.28-7.21 (m, 2H), 6.05 (td,  $J$  = 56.12, 4.4 Hz, 1H), 5.21 (t,  $J$  = 10.1 Hz, 1H), 2.41 (s, 1H).  $^{13}\text{C}$  NMR (125 MHz, Chloroform-*d*)  $\delta$  139.1, 136.3, 129.7, 127.1, 127.0, 124.5, 123.1, 120.9, 119.7, 115.6 (t,  $J$  = 245.4 Hz), 112.1 (t,  $J$  = 3.7 Hz), 110.9, 68.2 (t,  $J$  = 25.5 Hz), 29.7.  $^{19}\text{F}$  NMR (470 MHz, Chloroform-*d*)  $\delta$  -126.10 (ddd,  $J$  = 282.4, 55.7, 9.4 Hz), -127.09 (ddd,  $J$  = 282.5, 56.5, 11.5 Hz). **HRMS (ESI):** calcd for

C<sub>16</sub>H<sub>12</sub>F<sub>2</sub>NO [M + H]<sup>-</sup>: 272.0881, found: 272.0883.

### 2,2-Difluoro-1-(1-(4-methoxybenzyl)-1H-indol-3-yl)ethan-1-ol (3d)

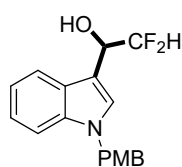

Following general procedure A at the temperature of 60 °C to afford the title compound as a colorless oil (28.5 mg, 45%). TLC (PE: EA, 2:1 v/v): R<sub>f</sub> = 0.7; <sup>1</sup>H NMR (500 MHz, Chloroform-*d*) δ 7.74 (d, *J* = 7.9 Hz, 1H), 7.33 (d, *J* = 8.2 Hz, 1H), 7.26 - 7.21 (m, 2H), 7.17 (td, *J* = 8.0, 0.96 Hz, 1H), 7.09 (d, *J* = 8.7 Hz, 2H), 6.84 (d, *J* = 8.7 Hz, 2H), 5.99 (td, *J* = 56.0, 4.5 Hz, 1H), 5.24 (s, 2H), 5.17-5.11 (m, 1H), 3.78 (s, 3H). <sup>13</sup>C NMR (125 MHz, Chloroform-*d*) δ 159.4, 136.8, 128.9, 128.5, 127.2, 126.7, 122.6, 120.2, 119.7, 115.8 (t, *J* = 244.7 Hz), 114.3, 110.4 (t, *J* = 3.7 Hz), 110.3, 68.4 (t, *J* = 25.4 Hz), 55.4, 49.8. <sup>19</sup>F NMR (470 MHz, Chloroform-*d*) δ -126.00 (ddd, *J* = 281.4, 55.8, 9.1 Hz), -127.18 (ddd, *J* = 281.4, 57.1, 12.1 Hz). **HRMS (ESI)**: calcd for C<sub>18</sub>H<sub>18</sub>F<sub>2</sub>NO<sub>2</sub> [M + H]<sup>+</sup>: 318.1300, found: 318.1297.

### 2,2-Difluoro-1-(2-methyl-1H-indol-3-yl)ethan-1-ol (3e)

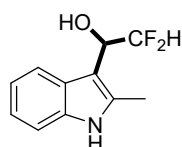

Following general procedure A at the temperature of 60 °C to afford the title compound as a brown oil (37.5 mg, 89%). TLC (PE: EA, 2:1 v/v): R<sub>f</sub> = 0.6; <sup>1</sup>H NMR (500 MHz, Chloroform-*d*) δ 7.95 (s, 1H), 7.69 (d, *J* = 7.8 Hz, 1H), 7.28 (d, *J* = 7.9 Hz, 1H), 7.15 (td, *J* = 7.5, 1.1 Hz, 1H), 7.11 (td, *J* = 7.6, 1.1 Hz, 1H), 6.05 (td, *J* = 56.5, 5.8 Hz, 1H), 5.09-5.03 (m, 1H), 2.43 (s, 3H), 2.32 (s, 1H). <sup>13</sup>C NMR (125 MHz, Chloroform-*d*) δ 135.3, 134.3, 126.7, 121.8, 120.2, 119.1, 115.5 (t, *J* = 244.5 Hz), 110.6, 106.6z (t, *J* = 3.6 Hz), 68.8 (t, *J* = 26.5 Hz), 12.1. <sup>19</sup>F NMR (470 MHz, Chloroform-*d*) δ -125.72 (d, *J* = 10.1 Hz), -125.84 (d, *J* = 10.2 Hz). **HRMS (ESI)**: calcd for C<sub>11</sub>H<sub>10</sub>F<sub>2</sub>NO [M + H]<sup>-</sup>: 210.0724, found: 210.0720.

### 2,2-Difluoro-1-(2-phenyl-1H-indol-3-yl)ethan-1-ol (3f)

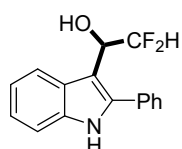

Following general procedure A at the temperature of 60 °C to afford the title compound as a yellow oil (27.3 mg, 50%). TLC (PE: EA, 4:1 v/v): R<sub>f</sub> = 0.3; <sup>1</sup>H NMR (500 MHz, Chloroform-*d*) δ 8.24 (s, 1H), 7.82 (d, *J* = 7.9 Hz, 1H), 7.51 (d, *J* = 6.7 Hz, 2H), 7.47 - 7.40 (m, 3H), 7.34 (d, *J* = 8.1 Hz, 1H), 7.22 (t, *J* = 7.6 Hz, 1H), 7.15 (t, *J* = 7.5 Hz, 1H), 6.21 (td, *J* = 56.5, 5.7 Hz, 1H), 5.13-5.08 (m, 1H), 2.35 (s, 1H). <sup>13</sup>C NMR (125 MHz, Chloroform-*d*) δ 138.4, 136.0, 131.7, 129.1, 129.1, 128.9, 126.6, 123.0, 120.8, 120.5, 115.6 (t, *J* =



244.5 Hz), 111.4, 107.7 (d,  $J = 6.6$  Hz), 68.7 (t,  $J = 26.6$  Hz).  $^{19}\text{F}$  NMR (470 MHz, Chloroform-*d*)  $\delta$  -123.67 (ddd,  $J = 283.1, 55.8, 8.7$  Hz), -124.95 (ddd,  $J = 283.1, 57.1, 10.5$  Hz). **HRMS (ESI):** calcd for  $\text{C}_{16}\text{H}_{12}\text{F}_2\text{NO}$  [ $\text{M} + \text{H}$ ]: 272.0881, found: 272.0883.

### 2,2-Difluoro-1-(4-methyl-1H-indol-3-yl)ethan-1-ol (3g)

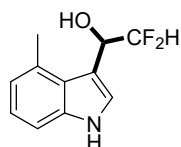

Following general procedure A at the temperature of 60 °C to afford the title compound as a white solid (30.4 mg, 72%). TLC (PE: EA, 2:1 *v/v*):  $R_f = 0.5$ ;  $^1\text{H}$  NMR (500 MHz, Chloroform-*d*)  $\delta$  8.24 (s, 1H), 7.23 - 7.18 (m, 2H), 7.11 (t,  $J = 7.6$  Hz, 1H), 6.91 (d,  $J = 7.5$  Hz, 1H), 6.01 (td,  $J = 55.8, 3.6$  Hz, 1H), 5.42-5.36 (m, 1H), 2.70 (s, 3H), 2.31 (d,  $J = 5.5$  Hz, 1H).  $^{13}\text{C}$  NMR (125 MHz, Chloroform-*d*)  $\delta$  136.3, 130.4, 125.1, 123.3, 122.8, 122.3, 116.2 (t,  $J = 245.0$  Hz), 112.1, 109.4, 67.6 (t,  $J = 24.3$  Hz), 20.5.  $^{19}\text{F}$  NMR (470 MHz, Chloroform-*d*)  $\delta$  -124.97 (ddd,  $J = 281.3, 55.5, 9.5$  Hz), -127.85 (ddd,  $J = 281.4, 56.1, 13.0$  Hz). **HRMS (ESI):** calcd for  $\text{C}_{11}\text{H}_{10}\text{F}_2\text{NO}$  [ $\text{M} + \text{H}$ ]: 210.0724, found: 210.0724.

### 1-(4-chloro-1H-indol-3-yl)-2,2-Difluoroethan-1-ol (3h)

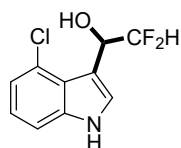

Following general procedure A at the temperature of 60 °C to afford the title compound as a colorless oil (40.6 mg, 88%). TLC (PE: EA, 2:1 *v/v*):  $R_f = 0.5$ ;  $^1\text{H}$  NMR (500 MHz, Chloroform-*d*)  $\delta$  8.47 (s, 1H), 7.34 (d,  $J = 2.6$  Hz, 1H), 7.27 (dd,  $J = 7.4, 1.6$  Hz, 1H), 7.14 - 7.09 (m, 2H), 6.12 (td,  $J = 55.5, 3.0$  Hz, 1H), 5.82 - 5.75 (m, 1H), 2.61 (d,  $J = 5.2$  Hz, 1H).  $^{13}\text{C}$  NMR (125 MHz, Chloroform-*d*)  $\delta$  137.6, 125.3, 124.8, 123.3, 121.5, 115.8 (t,  $J = 245.6$  Hz), 111.7 (t,  $J = 3.9$  Hz), 110.5, 67.2 (t,  $J = 23.9$  Hz).  $^{19}\text{F}$  NMR (470 MHz, Chloroform-*d*)  $\delta$  -125.63 (ddd,  $J = 279.2, 55.2, 9.1$  Hz), -131.17 (ddd,  $J = 279.2, 55.7, 14.9$  Hz). **HRMS (ESI):** calcd for  $\text{C}_{10}\text{H}_7\text{ClF}_2\text{NO}$  [ $\text{M} + \text{H}$ ]: 230.0178, found: 230.0178.

### 3-(2,2-Difluoro-1-hydroxyethyl)-1H-indole-4-carbaldehyde (3i)

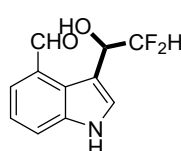

Following general procedure A at the temperature of 80 °C to afford the title compound as a white solid (34.9 mg, 77%). TLC (PE: EA, 2:1 *v/v*):  $R_f = 0.2$ ;  $^1\text{H}$  NMR (500 MHz, DMSO-*d*<sub>6</sub>)  $\delta$  11.76 (s, 1H), 10.27 (s, 1H), 7.78 (d,  $J = 8.0$  Hz, 1H), 7.70 (d,  $J = 7.3$  Hz, 1H), 7.67 (d,  $J = 2.6$  Hz, 1H), 7.32 (t,  $J = 7.7$  Hz, 1H), 6.05 (td,  $J = 46.5, 4.9$  Hz, 1H), 5.98 (d,  $J = 5.7$  Hz, 1H), 5.75 - 5.69 (m, 1H).  $^{13}\text{C}$  NMR (125 MHz, DMSO-*d*<sub>6</sub>)  $\delta$  194.0, 137.7, 129.1, 128.3, 127.0, 123.0, 120.6, 118.7, 117.0 (t,  $J = 242.6$  Hz), 113.0 (t,  $J = 4.3$  Hz),

67.0 (t,  $J = 22.8$  Hz).  $^{19}\text{F}$  NMR (470 MHz,  $\text{DMSO-}d_6$ )  $\delta$  -125.11 (ddd,  $J = 273.8, 55.5, 8.8$  Hz), -129.28 (ddd,  $J = 273.8, 56.3, 14.8$  Hz). **HRMS (ESI):** calcd for  $\text{C}_{11}\text{H}_8\text{F}_2\text{NO}_2$  [ $\text{M} + \text{H}$ ] $^-$ : 224.0517, found: 224.0521.

### 2,2-Difluoro-1-(4-nitro-1H-indol-3-yl)ethan-1-ol (3j)

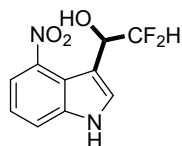

Following general procedure A at the temperature of 80 °C to afford the title compound as a yellow solid (36.8 mg, 76%). TLC (PE: EA, 2:1 v/v):  $R_f = 0.2$ ;  $^1\text{H}$  NMR (500 MHz, Chloroform- $d$ )  $\delta$  7.78 (ddd,  $J = 28.4, 8.0, 0.9$  Hz, 2H), 7.70 (s, 1H), 7.23 (t,  $J = 8.0$  Hz, 1H), 5.86 (td,  $J = 56.2, 4.0$  Hz, 1H), 5.53 (ddd,  $J = 12.5, 8.6, 3.9$  Hz, 1H).  $^{13}\text{C}$  NMR (125 MHz, Methanol- $d_4$ )  $\delta$  144.1, 140.8, 129.7, 121.4, 119.1, 119.0, 118.6, 118.1 (t,  $J = 244.0$  Hz), 112.5 (t,  $J = 4.0$  Hz), 68.2 (t,  $J = 24.7$  Hz).  $^{19}\text{F}$  NMR (470 MHz, Methanol- $d_4$ )  $\delta$  -128.25 (ddd,  $J = 281.2, 56.2, 8.6$  Hz), -130.25 (ddd,  $J = 281.2, 56.5, 12.9$  Hz). **HRMS (ESI):** calcd for  $\text{C}_{10}\text{H}_7\text{F}_2\text{N}_2\text{O}_3$  [ $\text{M} + \text{H}$ ] $^-$ : 241.0419, found: 241.0419.

### 2,2-Difluoro-1-(5-methoxy-1H-indol-3-yl)ethan-1-ol (3k)

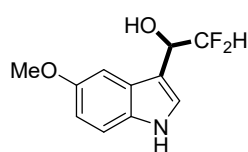

Following general procedure A at the temperature of 60 °C to afford the title compound as a white solid (27.2 mg, 60%). TLC (PE: EA, 2:1 v/v):  $R_f = 0.4$ ;  $^1\text{H}$  NMR (500 MHz, Chloroform- $d$ )  $\delta$  8.17 (s, 1H), 7.29 (d,  $J = 8.9$  Hz, 2H), 7.17 (d,  $J = 2.3$  Hz, 1H), 6.90 (dd,  $J = 8.8, 2.4$  Hz, 1H), 6.03 (td,  $J = 56.3, 3.9$  Hz, 1H), 5.13 (td,  $J = 11.6, 4.3$  Hz, 1H), 3.86 (s, 3H), 2.31 (s, 1H).  $^{13}\text{C}$  NMR (125 MHz, Chloroform- $d$ )  $\delta$  154.7, 131.4, 126.5, 124.0, 115.8 (t,  $J = 245.1$  Hz), 113.4, 112.3, 111.3 – 111.3 (m), 101.1, 68.5 (t,  $J = 25.8$  Hz), 56.0.  $^{19}\text{F}$  NMR (470 MHz, Chloroform- $d$ )  $\delta$  -125.55 – -127.80 (m). **HRMS (ESI):** calcd for  $\text{C}_{11}\text{H}_{10}\text{F}_2\text{NO}_2$  [ $\text{M} + \text{H}$ ] $^-$ : 226.0674, found: 226.0673.

### 1-(5-amino-1H-indol-3-yl)-2,2-Difluoroethan-1-ol (3l)

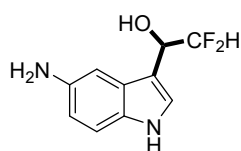

Following general procedure A at the temperature of 60 °C to afford the title compound as a brown oil (22.5 mg, 53%). TLC (PE: EA, 1:2 v/v):  $R_f = 0.2$ ;  $^1\text{H}$  NMR (500 MHz,  $\text{DMSO-}d_6$ )  $\delta$  10.64 (s, 1H), 7.16 (d,  $J = 2.6$  Hz, 1H), 7.07 (d,  $J = 8.5$  Hz, 1H), 6.78 (d,  $J = 1.8$  Hz, 1H), 6.50 (dd,  $J = 8.5, 2.1$  Hz, 1H), 6.04 (td,  $J = 56.4, 4.7$  Hz, 1H), 5.73 (d,  $J = 4.6$  Hz, 1H), 5.08 (s, 2H), 4.84- 4.79 (m, 1H).  $^{13}\text{C}$  NMR (125 MHz,  $\text{DMSO-}d_6$ )  $\delta$  141.1, 130.0, 127.1, 123.8, 116.6 (t,  $J = 243.2$  Hz), 112.1, 111.6, 110.1 (t,  $J = 3.9$  Hz), 102.4, 66.8 (t,  $J = 24.6$  Hz).  $^{19}\text{F}$  NMR (470 MHz,  $\text{DMSO-}d_6$ )  $\delta$  -124.77

(dd,  $J = 21.2, 11.3$  Hz),  $-124.89$  (dd,  $J = 20.3, 11.3$  Hz). **HRMS (ESI):** calcd for  $C_{10}H_{11}F_2N_2O$   $[M + H]^+$ : 213.0833, found: 213.0831.

### 2,2-Difluoro-1-(5-methyl-1H-indol-3-yl)ethan-1-ol (3m)

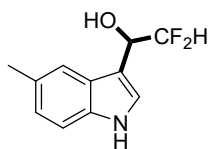

Following general procedure A at the temperature of  $60$  °C to afford the title compound as a yellow solid (30.4 mg, 72%). TLC (PE: EA, 2:1  $v/v$ ):  $R_f = 0.5$ ;  $^1H$  NMR (500 MHz, Chloroform- $d$ )  $\delta$  8.14 (s, 1H), 7.53 (s, 1H), 7.29 (d,  $J = 8.3$  Hz, 1H), 7.25 (s, 1H), 7.08 (d,  $J = 9.1$  Hz, 1H), 6.02 (td,  $J = 56.1, 4.3$  Hz, 1H), 5.16-5.10 (m, 1H), 2.47 (s, 3H), 2.28 (d,  $J = 4.3$  Hz, 1H).  $^{13}C$  NMR (125 MHz, Chloroform- $d$ )  $\delta$  134.7, 129.9, 126.2, 124.6, 123.5, 119.1, 115.8 (t,  $J = 245.0$  Hz), 111.2, 111.1 (t,  $J = 3.7$  Hz), 68.5 (t,  $J = 25.4$  Hz), 21.6.  $^{19}F$  NMR (470 MHz, Chloroform- $d$ )  $\delta$   $-126.08$  (ddd,  $J = 281.3, 55.7, 9.1$  Hz),  $-127.38$  (ddd,  $J = 281.7, 55.6, 12.1$  Hz). **HRMS (ESI):** calcd for  $C_{11}H_{10}F_2NO$   $[M + H]^+$ : 210.0724, found: 210.0725.

### 2,2-Difluoro-1-(5-fluoro-1H-indol-3-yl)ethan-1-ol (3n)

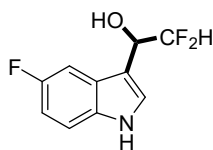

Following general procedure A at the temperature of  $80$  °C to afford the title compound as a green oil (37.8 mg, 88%). TLC (PE: EA, 2:1  $v/v$ ):  $R_f = 0.4$ ;  $^1H$  NMR (500 MHz, Chloroform- $d$ )  $\delta$  8.26 (s, 1H), 7.36 (dd,  $J = 9.6, 2.5$  Hz, 1H), 7.30 – 7.27 (m, 2H), (td,  $J = 9.0, 2.5$  Hz, 1H), 5.94 (td,  $J = 56.2, 4.2$  Hz, 1H), 5.10 – 5.04 (m, 1H), 2.43 (d,  $J = 4.2$  Hz, 1H).  $^{13}C$  NMR (125 MHz, Chloroform- $d$ )  $\delta$  158.1 (d,  $J = 235.7$  Hz), 132.7, 126.2 (d,  $J = 9.9$  Hz), 125.0, 115.5 (t,  $J = 245.2$  Hz), 112.2 (d,  $J = 9.7$  Hz), 111.4 (d,  $J = 26.0$  Hz), 110.8 (t,  $J = 3.2$  Hz), 104.5 (d,  $J = 23.9$  Hz), 68.2 (t,  $J = 25.3$  Hz).  $^{19}F$  NMR (470 MHz, Chloroform- $d$ )  $\delta$   $-123.27$  –  $-123.32$  (m),  $-126.35$  (ddd,  $J = 282.7, 55.6, 10.2$  Hz),  $-127.25$  (ddd,  $J = 282.8, 56.8, 11.8$  Hz). **HRMS (ESI):** calcd for  $C_{10}H_7F_3NO$   $[M + H]^+$ : 214.0474, found: 214.0473.

### 1-(5-chloro-1H-indol-3-yl)-2,2-Difluoroethan-1-ol (3o)

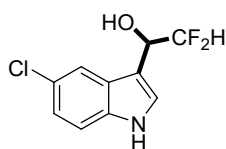

Following general procedure A at the temperature of  $60$  °C to afford the title compound as a yellow oil (37.9 mg, 82%). TLC (PE: EA, 2:1  $v/v$ ):  $R_f = 0.5$ ;  $^1H$  NMR (500 MHz, Chloroform- $d$ )  $\delta$  8.34 (s, 1H), 7.67 (d,  $J = 1.6$  Hz, 1H), 7.24 (d,  $J = 8.2$  Hz, 1H), 7.22 (d,  $J = 2.6$  Hz, 1H), 7.15 (dd,  $J = 8.7, 2.0$  Hz, 1H), 5.93 (td,  $J = 56.0, 4.2$  Hz, 1H), 5.07 – 5.01 (m, 1H), 2.62 (d,  $J = 3.6$  Hz, 1H).  $^{13}C$  NMR (125 MHz, Chloroform- $d$ )  $\delta$

134.6, 126.9, 126.1, 124.7, 123.1, 118.9, 115.5 (t,  $J = 245.0$  Hz), 112.5, 110.9 (t,  $J = 3.6$  Hz), 68.1 (t,  $J = 25.4$  Hz).  $^{19}\text{F}$  NMR (470 MHz, Chloroform-*d*)  $\delta$  -126.23 (ddd,  $J = 282.6, 55.8, 10.0$  Hz), -127.20 (ddd,  $J = 282.5, 56.8, 11.8$  Hz). **HRMS (ESI):** calcd for  $\text{C}_{10}\text{H}_7\text{ClF}_2\text{NO}$  [ $\text{M} + \text{H}$ ]: 230.0178, found: 230.0179.

### 2,2-Difluoro-1-(5-iodo-1H-indol-3-yl)ethan-1-ol (3p)

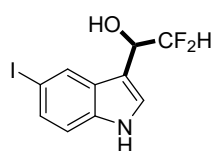

Following general procedure A at the temperature of 60 °C to afford the title compound as a brown oil (56.2 mg, 87%). TLC (PE: EA, 2:1 *v/v*):  $R_f = 0.5$ ;  $^1\text{H}$  NMR (500 MHz, Chloroform-*d*)  $\delta$  8.33 (s, 1H), 8.02 (s, 1H), 7.44 (d,  $J = 10.0$  Hz, 1H), 7.13 (d,  $J = 2.4$  Hz, 1H), 7.08 (d,  $J = 8.6$  Hz, 1H), 5.92 (td,  $J = 56.0, 4.2$  Hz, 1H), 5.02 (t,  $J = 10.4$  Hz, 1H), 2.64 (s, 1H).  $^{13}\text{C}$  NMR (125 MHz, Chloroform-*d*)  $\delta$  135.2, 131.1, 128.3, 128.2, 124.2, 115.4 (t,  $J = 245.0$  Hz), 113.4, 110.4 (t,  $J = 3.6$  Hz), 83.9, 68.0 (t,  $J = 25.4$  Hz).  $^{19}\text{F}$  NMR (470 MHz, Chloroform-*d*)  $\delta$  -126.17 (ddd,  $J = 282.6, 55.6, 10.2$  Hz), -127.20 (ddd,  $J = 282.4, 56.3, 11.6$  Hz). **HRMS (ESI):** calcd for  $\text{C}_{10}\text{H}_7\text{F}_2\text{INO}$  [ $\text{M} + \text{H}$ ]: 321.9534, found: 321.9530.

### 1-(3-(2,2-Difluoro-1-hydroxyethyl)-1H-indol-5-yl)ethan-1-one (3q)

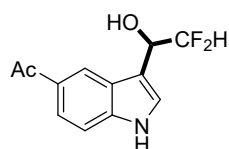

Following general procedure A at the temperature of 80 °C to afford the title compound as a yellow oil (38.9 mg, 81%). TLC (PE: EA, 1:1 *v/v*):  $R_f = 0.4$ ;  $^1\text{H}$  NMR (500 MHz, DMSO-*d*<sub>6</sub>)  $\delta$  11.51 (s, 1H), 8.40 (s, 1H), 7.76 (dd,  $J = 8.6, 1.6$  Hz, 1H), 7.50 (d,  $J = 2.4$  Hz, 1H), 7.47 (d,  $J = 8.6$  Hz, 1H), 6.18 (td,  $J = 55.9, 4.3$  Hz, 1H), 6.04 (d,  $J = 5.2$  Hz, 1H), 5.13- 5.07 (m, 1H), 2.61 (s, 3H).  $^{13}\text{C}$  NMR (125 MHz, DMSO-*d*<sub>6</sub>)  $\delta$  197.6, 138.9, 128.8, 126.1, 125.7, 122.0, 121.4, 116.4 (t,  $J = 243.7$  Hz), 113.6 (t,  $J = 3.5$  Hz), 111.5, 66.5 (t,  $J = 24.6$  Hz), 26.7.  $^{19}\text{F}$  NMR (470 MHz, DMSO-*d*<sub>6</sub>)  $\delta$  -125.20 (ddd,  $J = 276.7, 56.6, 12.8$  Hz), -126.32 (ddd,  $J = 275.1, 55.6, 11.3$  Hz). **HRMS (ESI):** calcd for  $\text{C}_{12}\text{H}_{12}\text{F}_2\text{NO}_2$  [ $\text{M} + \text{H}$ ]<sup>+</sup>: 240.0830, found: 240.0829.

### 3-(2,2-Difluoro-1-hydroxyethyl)-1H-indole-5-carboxylic acid (3r)

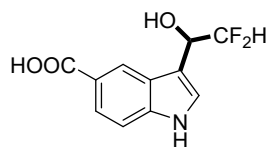

Following general procedure A at the temperature of 80 °C to afford the title compound as a white solid (32 mg, 66%). TLC (PE: EA, 1:1 *v/v*):  $R_f = 0.4$ ;  $^1\text{H}$  NMR (500 MHz, Methanol-*d*<sub>4</sub>)  $\delta$  8.49 (d,  $J = 1.0$  Hz, 1H), 7.85 (dd,  $J = 8.6, 1.6$  Hz, 1H), 7.43 (d,  $J = 7.2$  Hz, 2H), 6.02 (td,  $J = 56.0, 4.4$  Hz, 1H), 5.12 (td,  $J = 10.9, 4.5$  Hz, 1H), 1.99 (s, 2H).  $^{13}\text{C}$  NMR (125

MHz, Methanol-*d*<sub>4</sub>)  $\delta$  171.4z, 140.8, 127.3, 126.5, 124.3, 123.8, 122.7, 117.5 (t,  $J$  = 244.0 Hz), 114.1 (t,  $J$  = 3.5 Hz), 112.2, 68.7 (t,  $J$  = 24.8 Hz). <sup>19</sup>F NMR (470 MHz, Methanol-*d*<sub>4</sub>)  $\delta$  -127.50 (ddd,  $J$  = 281.2, 56.1, 10.8 Hz), -128.18 (ddd,  $J$  = 281.1, 55.6, 12.0 Hz). **HRMS (ESI)**: calcd for C<sub>11</sub>H<sub>8</sub>F<sub>2</sub>NO<sub>3</sub> [M + H]<sup>+</sup>: 240.0466, found: 240.0465.

### 2,2-Difluoro-1-(5-nitro-1H-indol-3-yl)ethan-1-ol (3s)

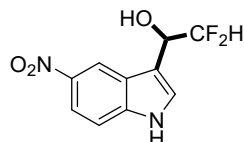

Following general procedure A at the temperature of 80 °C to afford the title compound as a yellow solid (41.6 mg, 86%). TLC (PE: EA, 2:1 v/v):  $R_f$  = 0.2; <sup>1</sup>H NMR (500 MHz, Methanol-*d*<sub>4</sub>)  $\delta$  8.71 (s, 1H), 8.05 (dd,  $J$  = 9.0, 2.2 Hz, 1H), 7.52 (s, 1H), 7.48 (d,  $J$  = 9.0 Hz, 1H), 6.02 (td,  $J$  = 56.1, 4.1 Hz, 1H), 5.14 (td,  $J$  = 11.5, 4.1 Hz, 1H). <sup>13</sup>C NMR (125 MHz, Methanol-*d*<sub>4</sub>)  $\delta$  142.7, 141.1, 128.5, 127.0, 118.1, 118.0, 117.5 (t,  $J$  = 244.0 Hz), 115.3 (t,  $J$  = 3.4 Hz), 112.6, 68.6 (t,  $J$  = 25.2 Hz). <sup>19</sup>F NMR (470 MHz, Methanol-*d*<sub>4</sub>)  $\delta$  -128.20 (ddd,  $J$  = 55.9, 49.3, 11.7 Hz). **HRMS (ESI)**: calcd for C<sub>10</sub>H<sub>7</sub>F<sub>2</sub>N<sub>2</sub>O<sub>3</sub> [M + H]<sup>+</sup>: 241.0419, found: 241.0419.

### 3-(2,2-Difluoro-1-hydroxyethyl)-1H-indole-5-carbonitrile (3t)

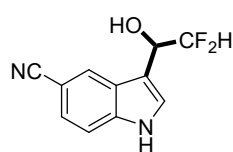

Following general procedure A at the temperature of 80 °C to afford the title compound as a yellow oil (37.3 mg, 84%). TLC (PE: EA, 2:1 v/v):  $R_f$  = 0.2; <sup>1</sup>H NMR (500 MHz, Chloroform-*d*)  $\delta$  8.66 (s, 1H), 8.12 (s, 1H), 7.45-7.43 (m, 3H), 6.95 (td,  $J$  = 56.0, 4.4 Hz, 1H), 5.19 – 5.13 (m, 1H), 2.59 (d,  $J$  = 4.0 Hz, 1H). <sup>13</sup>C NMR (125 MHz, Chloroform-*d*)  $\delta$  138.1, 126.0, 125.8, 125.8, 125.5, 120.5, 115.6 (t,  $J$  = 245.5 Hz), 112.5, 112.4 (t,  $J$  = 3.7 Hz), 103.7, 68.3 (t,  $J$  = 25.9 Hz). <sup>19</sup>F NMR (470 MHz, Chloroform-*d*)  $\delta$  -126.42 (ddd,  $J$  = 285.2, 56.7, 10.8 Hz), -127.18 (ddd,  $J$  = 284.0, 55.6, 9.9 Hz). **HRMS (ESI)**: calcd for C<sub>11</sub>H<sub>7</sub>F<sub>2</sub>N<sub>2</sub>O [M + H]<sup>+</sup>: 221.0520, found: 221.0520.

### 3-(2,2-Difluoro-1-hydroxyethyl)-1H-indole-5-carbaldehyde (3u)

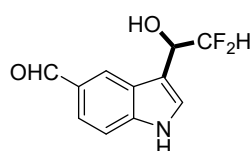

Following general procedure A at the temperature of 80 °C to afford the title compound as a white solid (40 mg, 89%). TLC (PE: EA, 2:1 v/v):  $R_f$  = 0.2; <sup>1</sup>H NMR (500 MHz, DMSO-*d*<sub>6</sub>)  $\delta$  11.65 (s, 1H), 9.99 (s, 1H), 8.32 (s, 1H), 7.66 (dd,  $J$  = 8.5, 1.4 Hz, 1H), 7.55 (dd,  $J$  = 5.4, 3.0 Hz, 2H), 6.18 (td,  $J$  = 56.5, 4.5 Hz, 1H), 6.09 (s, 1H), 5.10 (t,  $J$  = 9.9 Hz, 1H). <sup>13</sup>C NMR (125 MHz, DMSO-*d*<sub>6</sub>)  $\delta$  192.7, 139.8, 128.8, 126.5,

126.0, 125.5, 121.2, 116.4 (t,  $J = 243.6$  Hz), 113.8 (t,  $J = 7.1$  Hz), 112.4, 66.6 (t,  $J = 24.7$  Hz).  $^{19}\text{F}$  NMR (470 MHz,  $\text{DMSO-}d_6$ )  $\delta$  -125.13 (ddd,  $J = 276.5, 56.3, 12.2$  Hz), -126.10 (ddd,  $J = 276.2, 55.7, 11.4$  Hz). **HRMS (ESI):** calcd for  $\text{C}_{11}\text{H}_8\text{F}_2\text{NO}_2$   $[\text{M} + \text{H}]^+$ : 224.0517, found: 224.0521.

### 2,2-Difluoro-1-(6-methoxy-1H-indol-3-yl)ethan-1-ol (3v)

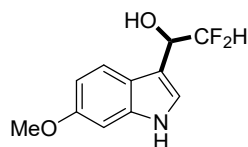

Following general procedure A at the temperature of 60 °C to afford the title compound as a white solid (40.8 mg, 90%). TLC (PE: EA, 2:1 v/v):  $R_f = 0.4$ ;  $^1\text{H}$  NMR (500 MHz, Methanol- $d_4$ )  $\delta$  7.53 (d,  $J = 8.7$  Hz, 1H), 7.18 (s, 1H), 6.90 (d,  $J = 2.2$  Hz, 1H), 6.71 (dd,  $J = 8.7, 2.3$  Hz, 1H), 5.98 (td,  $J = 55.9, 4.5$  Hz, 1H), 5.01 (td,  $J = 9.1, 4.8$  Hz, 1H), 3.80 (s, 3H).  $^{13}\text{C}$  NMR (125 MHz, Methanol- $d_4$ )  $\delta$  157.8, 138.8, 123.6, 121.9, 120.8, 117.6 (t,  $J = 243.7$  Hz), 112.4-112.4 (m), 110.6, 95.4, 69.2-68.8 (m), 55.9.  $^{19}\text{F}$  NMR (470 MHz, Methanol- $d_4$ )  $\delta$  -126.94 (ddd,  $J = 279.3, 55.7, 9.1$  Hz), -128.30 (ddd,  $J = 280.4, 57.1, 13.1$  Hz). **HRMS (ESI):** calcd for  $\text{C}_{11}\text{H}_{10}\text{F}_2\text{NO}_2$   $[\text{M} + \text{H}]^+$ : 226.0674, found: 226.0672.

### 1-(6-(benzyloxy)-1H-indol-3-yl)-2,2-Difluoroethan-1-ol (3w)

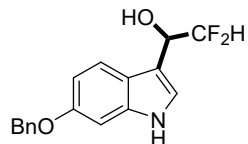

Following general procedure A at the temperature of 60 °C to afford the title compound as a yellow solid (52.1 mg, 86%). TLC (PE: EA, 2:1 v/v):  $R_f = 0.4$ ;  $^1\text{H}$  NMR (500 MHz, Chloroform- $d$ )  $\delta$  8.11 (s, 1H), 7.57 (d,  $J = 8.7$  Hz, 1H), 7.43 (d,  $J = 7.2$  Hz, 2H), 7.37 (t,  $J = 7.4$  Hz, 2H), 7.32 (t,  $J = 7.2$  Hz, 1H), 7.07 (d,  $J = 2.4$  Hz, 1H), 6.90 (dd,  $J = 8.7, 2.2$  Hz, 1H), 6.85 (d,  $J = 2.1$  Hz, 1H), 5.94 (td,  $J = 56.1, 4.3$  Hz, 1H), 5.05 (s, 3H), 2.51 (s, 1H).  $^{13}\text{C}$  NMR (125 MHz, Chloroform- $d$ )  $\delta$  155.9, 137.2, 136.9, 128.6, 127.9, 127.5, 122.3, 120.3, 120.0, 115.6 (t,  $J = 245.1$  Hz), 111.2 (t,  $J = 3.6$  Hz), 111.1, 96.2, 70.6, 68.3 (t,  $J = 25.3$  Hz).  $^{19}\text{F}$  NMR (470 MHz, Methanol- $d_4$ )  $\delta$  -126.98 (d,  $J = 280.6$  Hz), -128.27 (d,  $J = 280.6$  Hz). **HRMS (ESI):** calcd for  $\text{C}_{17}\text{H}_{14}\text{F}_2\text{NO}_2$   $[\text{M} + \text{H}]^+$ : 302.0987, found: 302.0988.

### 2,2-Difluoro-1-(6-fluoro-1H-indol-3-yl)ethan-1-ol (3x)

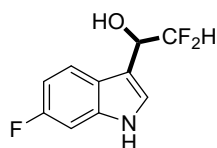

Following general procedure A at the temperature of 60 °C to afford the title compound as a brown oil (37.4 mg, 87%). TLC (PE: EA, 2:1 v/v):  $R_f = 0.4$ ;  $^1\text{H}$  NMR (500 MHz, Chloroform- $d$ )  $\delta$  8.28 (s, 1H), 7.62 (dd,  $J = 8.7, 5.3$  Hz, 1H), 7.20 (d,  $J = 2.5$  Hz, 1H), 7.02

(dd,  $J = 9.4, 2.3$  Hz, 1H), 6.92 (td,  $J = 9.2, 2.3$  Hz, 1H), 5.95 (td,  $J = 56.0, 4.3$  Hz, 1H), 5.11-5.06 (m, 1H), 2.56 (d,  $J = 4.1$  Hz, 1H).  $^{13}\text{C}$  NMR (125 MHz, Chloroform-*d*)  $\delta$  160.2 (d,  $J = 238.9$  Hz), 136.3 (d,  $J = 12.5$  Hz), 123.7, 122.4, 120.3 (d,  $J = 10.1$  Hz), 115.6 (t,  $J = 245.0$  Hz), 111.3 (t,  $J = 3.6$  Hz), 109.3 (d,  $J = 24.7$  Hz), 97.8 (d,  $J = 26.6$  Hz), 68.2 (t,  $J = 25.5$  Hz).  $^{19}\text{F}$  NMR (470 MHz, Chloroform-*d*)  $\delta$  -120.02 (td,  $J = 10.4, 9.6, 5.4$  Hz), -126.17 (ddd,  $J = 282.3, 55.9, 9.9$  Hz), -127.24 (ddd,  $J = 282.4, 56.3, 11.8$  Hz). **HRMS (ESI):** calcd for  $\text{C}_{10}\text{H}_7\text{F}_3\text{NO}$  [ $\text{M} + \text{H}$ ] $^+$ : 214.0474, found: 214.0465.

### 1-(6-chloro-1H-indol-3-yl)-2,2-Difluoroethan-1-ol (3y)

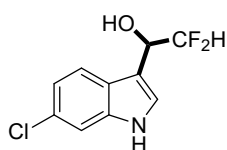

Following general procedure A at the temperature of 60 °C to afford the title compound as a yellow solid (41.1 mg, 89%). TLC (PE: EA, 2:1 v/v):  $R_f = 0.5$ ;  $^1\text{H}$  NMR (500 MHz, Chloroform-*d*)  $\delta$  8.25 (s, 1H), 7.64 (d,  $J = 8.5$  Hz, 1H), 7.37 (d,  $J = 1.7$  Hz, 1H), 7.28 (d,  $J = 2.5$  Hz, 1H), 7.14 (dd,  $J = 8.5, 1.7$  Hz, 1H), 5.96 (td,  $J = 56.1, 4.3$  Hz, 1H), 5.15-5.09 (m, 1H), 2.38 (d,  $J = 4.3$  Hz, 1H).  $^{13}\text{C}$  NMR (125 MHz, Chloroform-*d*)  $\delta$  136.6, 128.8, 124.5, 123.9, 121.2, 120.4, 115.6 (t,  $J = 245.0$  Hz), 111.6 (t,  $J = 3.6$  Hz), 111.4, 68.2 (t,  $J = 25.0$  Hz).  $^{19}\text{F}$  NMR (470 MHz, Chloroform-*d*)  $\delta$  -126.41 (ddd,  $J = 282.2, 56.9, 10.1$  Hz), -127.18 (ddd,  $J = 283.5, 56.4, 11.1$  Hz). **HRMS (ESI):** calcd for  $\text{C}_{10}\text{H}_7\text{ClF}_2\text{NO}$  [ $\text{M} + \text{H}$ ] $^+$ : 230.0178, found: 230.0179.

### 1-(6-bromo-1H-indol-3-yl)-2,2-Difluoroethan-1-ol (3z)

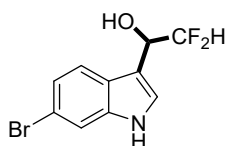

Following general procedure A at the temperature of 60 °C to afford the title compound as a white solid (47.7 mg, 87%). TLC (PE: EA, 2:1 v/v):  $R_f = 0.5$ ;  $^1\text{H}$  NMR (500 MHz, Chloroform-*d*)  $\delta$  8.27 (s, 1H), 7.56 (d,  $J = 8.5$  Hz, 1H), 7.50 (d,  $J = 1.5$  Hz, 1H), 7.25 (dd,  $J = 8.5, 1.5$  Hz, 1H), 7.21 (d,  $J = 2.5$  Hz, 1H), 5.94 (td,  $J = 56.0, 4.3$  Hz, 1H), 5.12 – 5.06 (m, 1H), 2.49 (d,  $J = 4.2$  Hz, 1H).  $^{13}\text{C}$  NMR (125 MHz, Chloroform-*d*)  $\delta$  137.0, 124.7, 123.9, 123.7, 120.7, 116.3, 115.5 (t,  $J = 245.0$  Hz), 114.4, 111.5 (t,  $J = 3.5$  Hz), 68.1 (t,  $J = 25.5$  Hz).  $^{19}\text{F}$  NMR (470 MHz, Chloroform-*d*)  $\delta$  -126.34 (d,  $J = 282.7$  Hz), -127.22 (d,  $J = 282.7$  Hz). **HRMS (ESI):** calcd for  $\text{C}_{10}\text{H}_7\text{BrF}_2\text{NO}$  [ $\text{M} + \text{H}$ ] $^+$ : 273.9673, found: 273.9676.

### 2,2-Difluoro-1-(6-(trifluoromethyl)-1H-indol-3-yl)ethan-1-ol (3a')

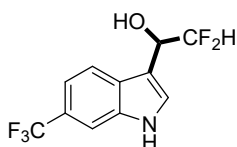

Following general procedure A at the temperature of 80 °C to afford the title compound as a brown oil (40.3 mg, 76%). TLC

(PE: EA, 2:1 v/v):  $R_f = 0.5$ ;  $^1\text{H NMR}$  (500 MHz, Chloroform-*d*)  $\delta$  8.54 (s, 1H), 7.83 (d,  $J = 8.4$  Hz, 1H), 7.68 (s, 1H), 7.44 (s, 1H), 7.41 (d,  $J = 8.4$  Hz, 1H), 5.98 (td,  $J = 56.1, 4.4$  Hz, 1H), 5.21-5.15 (m, 1H), 2.48 (d,  $J = 3.7$  Hz, 1H).  $^{13}\text{C NMR}$  (125 MHz, Chloroform-*d*)  $\delta$  135.1, 128.2, 125.9, 124.9 (q,  $J = 271.8$  Hz), 125.0 (q,  $J = 32.1$  Hz), 120.0, 117.1 (q,  $J = 3.6$  Hz), 115.6 (t,  $J = 245.5$  Hz), 111.7 (t,  $J = 3.6$  Hz), 109.1 (q,  $J = 4.5$  Hz), 68.2 (t,  $J = 25.6$  Hz).  $^{19}\text{F NMR}$  (470 MHz, Chloroform-*d*)  $\delta$  -60.81, -126.77 (t,  $J = 10.3$  Hz), -126.89 (t,  $J = 9.9$  Hz). **HRMS (ESI)**: calcd for  $\text{C}_{11}\text{H}_7\text{F}_5\text{NO}$  [ $\text{M} + \text{H}$ ] $^-$ : 264.0442, found: 264.0443.

### 3-(2,2-Difluoro-1-hydroxyethyl)-1H-indole-6-carboxylic acid (3b')

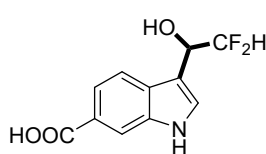

Following general procedure A at the temperature of 80 °C to afford the title compound as a white solid (30 mg, 62%). TLC (PE: EA, 1:1 v/v):  $R_f = 0.4$ ;  $^1\text{H NMR}$  (500 MHz, Methanol-*d*<sub>4</sub>)  $\delta$  8.14 (s, 1H), 7.75 (s, 2H), 7.52 (s, 1H), 6.02 (td,  $J = 56.0, 4.1$  Hz, 1H), 5.11 (td,  $J = 10.6, 4.3$  Hz, 1H).  $^{13}\text{C NMR}$  (125 MHz, Methanol-*d*<sub>4</sub>)  $\delta$  171.4, 137.3, 131.3, 128.5, 124.9, 121.5, 119.9, 117.5 (t,  $J = 243.8$  Hz), 115.1, 113.1 (t,  $J = 3.6$  Hz), 68.6 (t,  $J = 25.2$  Hz).  $^{19}\text{F NMR}$  (470 MHz, Methanol-*d*<sub>4</sub>)  $\delta$  -127.58 (ddd,  $J = 281.8, 56.2, 10.8$  Hz), -128.30 (dd,  $J = 281.1, 56.6, 12.2$  Hz). **HRMS (ESI)**: calcd for  $\text{C}_{11}\text{H}_8\text{F}_2\text{NO}_3$  [ $\text{M} + \text{H}$ ] $^-$ : 240.0466, found: 240.0466.

### 2,2-Difluoro-1-(6-nitro-1H-indol-3-yl)ethan-1-ol (3c')

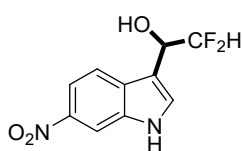

Following general procedure A at the temperature of 80 °C to afford the title compound as a yellow solid (42.6 mg, 88%). TLC (PE: EA, 2:1 v/v):  $R_f = 0.3$ ;  $^1\text{H NMR}$  (500 MHz, Methanol-*d*<sub>4</sub>)  $\delta$  8.36 (d,  $J = 1.8$  Hz, 1H), 7.97 (dd,  $J = 8.9, 2.1$  Hz, 1H), 7.83 (d,  $J = 8.9$  Hz, 1H), 7.68 (s, 1H), 6.01 (td,  $J = 56.2, 4.0$  Hz, 1H), 5.13 (td,  $J = 11.3, 4.2$  Hz, 1H).  $^{13}\text{C NMR}$  (125 MHz, Methanol-*d*<sub>4</sub>)  $\delta$  144.4, 136.5, 132.4, 131.2, 120.6, 117.5 (t,  $J = 243.7$  Hz), 115.4, 114.0 (t,  $J = 3.6$  Hz), 109.2, 68.5 (t,  $J = 25.4$  Hz).  $^{19}\text{F NMR}$  (470 MHz, Methanol-*d*<sub>4</sub>)  $\delta$  -127.84 (ddd,  $J = 280.8, 55.9, 10.8$  Hz), -128.58 (ddd,  $J = 280.4, 55.5, 10.5$  Hz). **HRMS (ESI)**: calcd for  $\text{C}_{10}\text{H}_7\text{F}_2\text{N}_2\text{O}_3$  [ $\text{M} + \text{H}$ ] $^-$ : 241.0419, found: 241.0420.

### 3-(2,2-Difluoro-1-hydroxyethyl)-1H-indole-6-carbonitrile (3d')

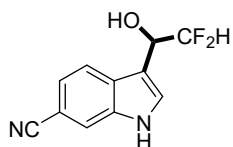

Following general procedure A at the temperature of 80 °C to afford the title compound as a white solid (39.1 mg, 88%). TLC



(PE: EA, 2:1 v/v):  $R_f = 0.2$ ;  $^1\text{H NMR}$  (500 MHz, Methanol- $d_4$ )  $\delta$  7.03 (d,  $J = 8.3$  Hz, 1H), 6.98 (s, 1H), 6.78 (s, 1H), 6.51 (d,  $J = 9.5$  Hz, 1H), 5.18 (td,  $J = 56.1, 4.2$  Hz, 1H), 4.30 (td,  $J = 11.3, 4.1$  Hz, 1H).  $^{13}\text{C NMR}$  (125 MHz, Methanol- $d_4$ )  $\delta$  136.9, 130.9, 129.3, 122.9, 121.6, 121.5, 117.5, 117.5 (t,  $J = 243.6$  Hz), 113.7 (t,  $J = 3.5$  Hz), 104.8, 68.5 (t,  $J = 25.2$  Hz).  $^{19}\text{F NMR}$  (470 MHz, Methanol- $d_4$ )  $\delta$  -127.78 (ddd,  $J = 280.8, 56.3, 10.7$  Hz), -128.43 (ddd,  $J = 281.5, 55.9, 11.4$  Hz). **HRMS (ESI)**: calcd for  $\text{C}_{11}\text{H}_7\text{F}_2\text{N}_2\text{O}$  [ $\text{M} + \text{H}$ ] $^+$ : 221.0520, found: 221.0520.

### 2,2-Difluoro-1-(7-methyl-1H-indol-3-yl)ethan-1-ol (3e')

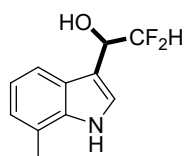

Following general procedure A at the temperature of 60 °C to afford the title compound as a yellow oil (37.1 mg, 88%). TLC (PE: EA, 2:1 v/v):  $R_f = 0.4$ ;  $^1\text{H NMR}$  (500 MHz, Chloroform- $d$ )  $\delta$  8.17 (s, 1H), 7.57 (d,  $J = 7.8$  Hz, 1H), 7.26 (s, 1H), 7.09 (t,  $J = 7.5$  Hz, 1H), 7.05 (d,  $J = 6.9$  Hz, 1H), 5.98 (td,  $J = 55.6, 3.0$  Hz, 1H), 5.15-5.10 (m, 1H), 2.47 (s, 3H), 2.37 (d,  $J = 3.4$  Hz, 1H).  $^{13}\text{C NMR}$  (125 MHz, Chloroform- $d$ )  $\delta$  136.0, 125.5, 123.4, 123.1, 120.8, 120.7, 117.1, 115.8 (t,  $J = 244.7$  Hz), 112.0 (t,  $J = 3.7$  Hz), 68.5 (t,  $J = 25.4$  Hz), 16.7.  $^{19}\text{F NMR}$  (470 MHz, Chloroform- $d$ )  $\delta$  -126.14 (ddd,  $J = 282.1, 55.7, 9.7$  Hz), -127.34 (ddd,  $J = 282.1, 56.6, 12.0$  Hz). **HRMS (ESI)**: calcd for  $\text{C}_{11}\text{H}_{10}\text{F}_2\text{NO}$  [ $\text{M} + \text{H}$ ] $^+$ : 210.0724, found: 210.0715.

### 2,2-Difluoro-1-(7-methoxy-1H-indol-3-yl)ethan-1-ol (3f')

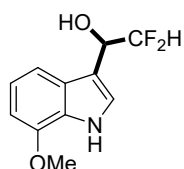

Following general procedure A at the temperature of 60 °C to afford the title compound as a yellow oil (39.9 mg, 88%). TLC (PE: EA, 2:1 v/v):  $R_f = 0.4$ ;  $^1\text{H NMR}$  (500 MHz, Chloroform- $d$ )  $\delta$  8.53 (s, 1H), 7.32 (d,  $J = 8.0$  Hz, 1H), 7.24 (d,  $J = 2.4$  Hz, 1H), 7.08 (t,  $J = 7.9$  Hz, 1H), 6.68 (d,  $J = 7.7$  Hz, 1H), 5.99 (td,  $J = 56.1, 4.4$  Hz, 1H), 5.14-5.09 (m, 1H), 3.95 (s, 3H), 2.47 (s, 1H).  $^{13}\text{C NMR}$  (125 MHz, Chloroform- $d$ )  $\delta$  146.2, 127.1, 126.9, 122.9, 120.9, 115.6 (t,  $J = 244.9$  Hz), 111.9, 111.8 (t,  $J = 3.8$  Hz), 102.4, 68.3 (t,  $J = 25.4$  Hz), 55.4.  $^{19}\text{F NMR}$  (470 MHz, Chloroform- $d$ )  $\delta$  -126.18 (dd,  $J = 282.3, 55.5, 10.3$  Hz), -127.38 (ddd,  $J = 282.5, 57.1, 11.9$  Hz). **HRMS (ESI)**: calcd for  $\text{C}_{11}\text{H}_{10}\text{F}_2\text{NO}_2$  [ $\text{M} + \text{H}$ ] $^+$ : 226.0674, found: 226.0681.

### 1-(7-chloro-1H-indol-3-yl)-2,2-Difluoroethan-1-ol (3g')

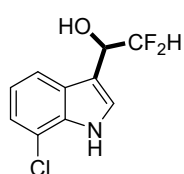

Following general procedure A at the temperature of 60 °C to afford the title compound as a yellow oil (41.6 mg, 90%). TLC (PE: EA, 2:1

*v/v*):  $R_f = 0.7$ ;  $^1\text{H NMR}$  (500 MHz, Chloroform-*d*)  $\delta$  8.50 (s, 1H), 7.63 (d,  $J = 8.0$  Hz, 1H), 7.33 (d,  $J = 2.5$  Hz, 1H), 7.25 (d,  $J = 2.0$  Hz, 1H), 7.10 (t,  $J = 7.8$  Hz, 1H), 5.97 (td,  $J = 56.1, 4.4$  Hz, 1H), 5.13 (td,  $J = 10.6, 4.3$  Hz, 1H), 2.51 (s, 1H).  $^{13}\text{C NMR}$  (125 MHz, Chloroform-*d*)  $\delta$  133.6, 127.3, 123.9, 122.1, 121.2, 118.2, 116.9, 115.5 (t,  $J = 245.3$  Hz), 112.5 (t,  $J = 3.6$  Hz), 68.3 (t,  $J = 25.7$  Hz).  $^{19}\text{F NMR}$  (470 MHz, Chloroform-*d*)  $\delta$  -126.00 (ddd,  $J = 281.6, 54.9, 9.9$  Hz), -127.23 (ddd,  $J = 281.6, 56.9, 12.0$  Hz). **HRMS (ESI)**: calcd for  $\text{C}_{10}\text{H}_7\text{ClF}_2\text{NO}$  [ $\text{M} + \text{H}$ ] $^+$ : 230.0178, found: 230.0179.

### 1-(5,6-dichloro-1H-indol-3-yl)-2,2-difluoroethan-1-ol (3h')

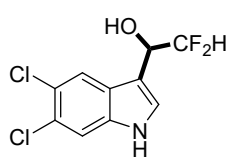

Following general procedure A at the temperature of 60 °C to afford the title compound as a yellow oil (42.4 mg, 80%). TLC (PE: EA, 2:1 *v/v*):  $R_f = 0.4$ ;  $^1\text{H NMR}$  (500 MHz, Chloroform-*d*)  $\delta$  8.42 (s, 1H), 7.78 (s, 1H), 7.43 (s, 1H), 7.26 (s, 1H), 5.93 (td,  $J = 56.1, 4.3$  Hz, 1H), 5.06 (td,  $J = 10.7, 4.2$  Hz, 1H), 2.76 (s, 1H).  $^{13}\text{C NMR}$  (125 MHz, Chloroform-*d*)  $\delta$  134.9, 126.6, 125.5, 125.2, 124.4, 120.6, 115.4 (t,  $J = 245.3$  Hz), 112.9, 110.9 (t,  $J = 3.6$  Hz), 68.0 (t,  $J = 25.5$  Hz).  $^{19}\text{F NMR}$  (470 MHz, Chloroform-*d*)  $\delta$  -126.39 (ddd,  $J = 282.8, 55.6, 10.3$  Hz), -127.27 (ddd,  $J = 282.2, 55.3, 10.2$  Hz). **HRMS (ESI)**: calcd for  $\text{C}_{10}\text{H}_6\text{Cl}_2\text{F}_2\text{NO}$  [ $\text{M} + \text{H}$ ] $^+$ : 263.9789, found: 263.9789.

### 1-(5-bromo-1-methyl-1H-indol-3-yl)-2,2-Difluoroethan-1-ol (3i')

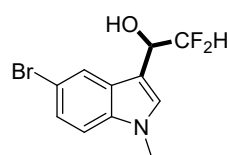

Following general procedure A at the temperature of 60 °C to afford the title compound as a white solid (42.6 mg, 74%). TLC (PE: EA, 2:1 *v/v*):  $R_f = 0.4$ ;  $^1\text{H NMR}$  (500 MHz, Methanol-*d*<sub>4</sub>)  $\delta$  7.72 (s, 1H), 7.19 – 7.15 (m, 3H), 5.85 (td,  $J = 56.2, 4.2$  Hz, 1H), 4.90 (td,  $J = 11.4, 4.3$  Hz, 1H), 3.66 (s, 3H).  $^{13}\text{C NMR}$  (125 MHz, Methanol-*d*<sub>4</sub>)  $\delta$  137.3, 130.6, 129.8, 125.6, 123.2, 117.5 (t,  $J = 243.7$  Hz), 113.7, 112.2, 111.5 (t,  $J = 3.6$  Hz), 68.5 (t,  $J = 25.1$  Hz), 33.0.  $^{19}\text{F NMR}$  (470 MHz, Methanol-*d*<sub>4</sub>)  $\delta$  -127.61 (ddd,  $J = 281.2, 56.4, 11.1$  Hz), -128.27 (ddd,  $J = 281.4, 57.0, 11.7$  Hz). **HRMS (ESI)**: calcd for  $\text{C}_{11}\text{H}_9\text{BrF}_2\text{NO}$  [ $\text{M} + \text{H}$ ] $^+$ : 287.9830, found: 287.9840.

### 1-(2,5-dimethyl-1H-indol-3-yl)-2,2-Difluoroethan-1-ol (3j')

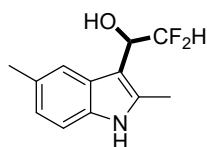

Following general procedure A at the temperature of 80 °C to afford the title compound as a red oil (15.7 mg, 35%). TLC (PE: EA, 2:1 *v/v*):  $R_f = 0.6$ ;  $^1\text{H NMR}$  (500 MHz, Chloroform-*d*)  $\delta$  7.89 (s, 1H),

7.48 (s, 1H), 7.17 (d,  $J = 8.2$  Hz, 1H), 6.98 (d,  $J = 8.2$  Hz, 1H), 6.06 (td,  $J = 56.6, 5.6$  Hz, 1H), 5.05 – 5.0 (m, 1H), 2.42 (d,  $J = 9.8$  Hz, 6H), 2.35 (s, 1H).  $^{13}\text{C}$  NMR (125 MHz, Chloroform-*d*)  $\delta$  134.3, 133.5, 129.5, 126.8, 123.2, 118.7, 115.5 (t,  $J = 244.4$  Hz), 110.2, 106.0 (t,  $J = 4.0$  Hz), 68.8 (t,  $J = 26.5$  Hz), 21.5, 12.1.  $^{19}\text{F}$  NMR (470 MHz, Chloroform-*d*)  $\delta$  -125.63 (d,  $J = 10.2$  Hz), -125.75 (d,  $J = 10.2$  Hz). **HRMS (ESI):** calcd for  $\text{C}_{12}\text{H}_{12}\text{F}_2\text{NO}$  [ $\text{M} + \text{H}$ ] $^+$ : 224.0881, found: 224.0881.

### 2,2-Difluoro-1-(1H-pyrrol-2-yl)ethan-1-ol (3l')

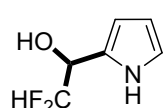

Following general procedure A at the temperature of 60 °C to afford the title compound as a colorless oil (13.4 mg, 45%). TLC (PE: EA, 2:1 v/v):  $R_f = 0.5$ ;  $^1\text{H}$  NMR (500 MHz, Chloroform-*d*)  $\delta$  8.55 (s, 1H), 6.87 – 6.81 (m, 1H), 6.24 (s, 1H), 6.21 (q,  $J = 2.8$  Hz, 1H), 5.84 (td,  $J = 55.8, 3.6$  Hz, 1H), 4.91 (t,  $J = 9.9$  Hz, 1H), 2.54 (s, 1H).  $^{13}\text{C}$  NMR (125 MHz, Chloroform-*d*)  $\delta$  127.6, 118.1, 114.0 (t,  $J = 245.3$  Hz), 107.8, 107.0, 67.0 (t,  $J = 24.8$  Hz).  $^{19}\text{F}$  NMR (470 MHz, Chloroform-*d*)  $\delta$  -127.26 (ddd,  $J = 284.3, 55.5, 10.4$  Hz), -129.17 (ddd,  $J = 283.5, 56.0, 12.8$  Hz). **HRMS (ESI):** calcd for  $\text{C}_6\text{H}_6\text{F}_2\text{NO}$  [ $\text{M} + \text{H}$ ] $^+$ : 146.0411, found: 146.0411.

### 1,1'-(1H-pyrrole-3,4-diyl)bis(2,2-Difluoroethan-1-ol) (3l')

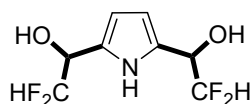

Following general procedure A to afford the title compound as a yellow oil (10.4 mg, 23%). TLC (PE: EA, 2:1 v/v):  $R_f = 0.2$ ;  $^1\text{H}$  NMR (500 MHz, Chloroform-*d*)  $\delta$  9.01 (s, 1H), 6.19 (s, 2H), 5.82 (td,  $J = 55.6, 3.2$  Hz, 2H), 4.84 (t,  $J = 11.2$  Hz, 2H), 3.08 (s, 2H).  $^{13}\text{C}$  NMR (125 MHz, Chloroform-*d*)  $\delta$  126.8 (q,  $J = 3.2$  Hz), 114.8 (t,  $J = 245.2$  Hz), 108.4, 108.3, 67.9 (td,  $J = 25.0, 2.7$  Hz).  $^{19}\text{F}$  NMR (470 MHz, Chloroform-*d*)  $\delta$  -127.26 (ddd,  $J = 285.2, 55.5, 10.0$  Hz), -129.06 (ddd,  $J = 284.9, 55.9, 12.0, 8.5$  Hz). **HRMS (ESI):** calcd for  $\text{C}_8\text{H}_8\text{F}_4\text{NO}_2$  [ $\text{M} + \text{H}$ ] $^+$ : 226.0485, found: 226.0483.

### 2,2-Difluoro-1-(1-phenyl-1H-pyrrol-2-yl)ethan-1-ol (3m')

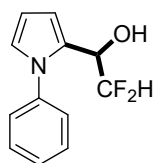

Following general procedure A to afford the title compound as a yellow oil (28.7 mg, 64%). TLC (PE: EA, 2:1 v/v):  $R_f = 0.2$ ;  $^1\text{H}$  NMR (500 MHz, Chloroform-*d*)  $\delta$  7.47 (t,  $J = 7.6$  Hz, 2H), 7.42 – 7.40 (m, 3H), 6.89 (dd,  $J = 2.7, 1.7$  Hz, 1H), 6.48 (d,  $J = 3.5$  Hz, 1H), 6.31 (t,  $J = 3.2$  Hz, 1H), 5.92 (td,  $J = 55.7, 4.2$  Hz, 1H), 4.68-4.62 (m, 1H), 2.23 (d,  $J = 6.3$  Hz, 1H).  $^{13}\text{C}$  NMR (125 MHz, Chloroform-*d*)  $\delta$  139.1, 129.4, 128.2 (t,  $J = 4.0$  Hz), 127.9, 126.3, 124.2,

115.2 (t,  $J = 245.0$  Hz), 109.4, 109.0, 65.7 (t,  $J = 25.5$  Hz).  $^{19}\text{F}$  NMR (470 MHz, Chloroform-*d*)  $\delta$  -125.17 (ddd,  $J = 282.8, 55.4, 9.3$  Hz), -127.70 (ddd,  $J = 283.4, 56.3, 12.5$  Hz). **HRMS (ESI)**: calcd for  $\text{C}_{12}\text{H}_{10}\text{F}_2\text{NO}$  [ $\text{M} + \text{H}$ ] $^-$ : 222.0724, found: 222.0733.

#### 1-(4-(dimethylamino)phenyl)-2,2-Difluoroethan-1-ol (5a)

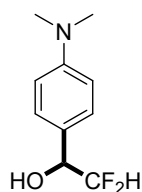

Following general procedure B at the temperature of 90 °C to afford the title compound as a white solid (30 mg, 75%). TLC (PE: EA, 8:1 v/v):  $R_f = 0.3$ ;  $^1\text{H}$  NMR (500 MHz, Chloroform-*d*)  $\delta$  7.27 (d,  $J = 8.7$  Hz, 2H), 6.73 (d,  $J = 8.7$  Hz, 2H), 5.75 (td,  $J = 56.2, 4.8$  Hz, 1H), 4.70 (td,  $J = 10.2, 4.8$  Hz, 1H), 2.96 (s, 6H), 2.36 (s, 1H).  $^{13}\text{C}$  NMR (125 MHz, Chloroform-*d*)  $\delta$  151.1, 128.2, 123.7, 116.2 (t,  $J = 245.0$  Hz), 112.6, 73.6 (t,  $J = 24.6$  Hz), 40.6.  $^{19}\text{F}$  NMR (470 MHz, Chloroform-*d*)  $\delta$  -127.01 (ddd,  $J = 282.4, 56.1, 10.1$  Hz), -127.69 (ddd,  $J = 282.7, 57.0, 10.6$  Hz). **HRMS (ESI)**: calcd for  $\text{C}_{10}\text{H}_{14}\text{F}_2\text{NO}$  [ $\text{M} + \text{H}$ ] $^+$ : 202.1037, found: 202.1034.

#### 1-(4-(diethylamino)phenyl)-2,2-Difluoroethan-1-ol (5b)

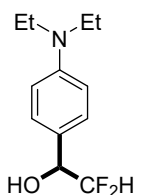

Following general procedure B at the temperature of 90 °C to afford the title compound as a yellow oil (32.5 mg, 71%). TLC (PE: EA, 8:1 v/v):  $R_f = 0.3$ ;  $^1\text{H}$  NMR (500 MHz, Chloroform-*d*)  $\delta$  7.24 (d,  $J = 8.7$  Hz, 2H), 6.68 (d,  $J = 8.8$  Hz, 2H), 5.76 (td,  $J = 56.2, 4.8$  Hz, 1H), 4.68 (td,  $J = 10.3, 4.8$  Hz, 1H), 3.36 (q,  $J = 7.1$  Hz, 4H), 2.33 (s, 1H), 1.17 (t,  $J = 7.1$  Hz, 6H).  $^{13}\text{C}$  NMR (125 MHz, Chloroform-*d*)  $\delta$  148.4, 128.5, 122.3 (t,  $J = 3.2$  Hz), 116.2 (t,  $J = 244.5$  Hz), 111.6, 73.9 – 73.5 (m), 44.5, 12.6.  $^{19}\text{F}$  NMR (470 MHz, Chloroform-*d*)  $\delta$  -126.88 (ddd,  $J = 281.8, 56.4, 9.6$  Hz), -127.65 (ddd,  $J = 281.8, 55.9, 10.6$  Hz). **HRMS (ESI)**: calcd for  $\text{C}_{12}\text{H}_{18}\text{F}_2\text{NO}$  [ $\text{M} + \text{H}$ ] $^+$ : 230.1350, found: 230.1347.

#### 1-(4-(ethyl(2-hydroxyethyl)amino)phenyl)-2,2-Difluoroethan-1-ol (5c)

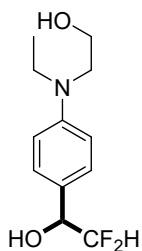

Following general procedure B at the temperature of 90 °C to afford the title compound as a colorless oil (30.9 mg, 63%). TLC (PE: EA, 1:1 v/v):  $R_f = 0.4$ ;  $^1\text{H}$  NMR (500 MHz, Chloroform-*d*)  $\delta$  7.16 (d,  $J = 8.6$  Hz, 2H), 6.66 (d,  $J = 8.7$  Hz, 2H), 5.66 (td,  $J = 56.2, 4.8$  Hz, 1H), 4.61-4.56 (m, 1H), 3.68 (t,  $J = 5.8$  Hz, 2H), 3.38-3.31 (m, 4H), 2.72 (s, 1H), 1.95 (s, 1H), 1.07 (t,  $J = 7.0$  Hz, 3H).  $^{13}\text{C}$  NMR (125 MHz, Chloroform-*d*)  $\delta$  148.8, 128.5, 123.6 (t,  $J = 3.3$  Hz), 116.1 (t,  $J = 245.0$  Hz), 112.4, 73.4 (t,  $J = 25.0$  Hz), 60.2, 52.4, 45.6, 11.9.  $^{19}\text{F}$  NMR (470 MHz, Chloroform-*d*)  $\delta$  -126.94 (ddd,  $J = 282.3,$

56.2, 9.8 Hz), -127.60 (ddd,  $J = 281.8, 56.7, 10.0$  Hz). **HRMS (ESI):** calcd for  $C_{12}H_{16}F_2NO_2$   $[M + H]^+$ : 244.1143, found: 244.1142.

### 2,2-Difluoro-1-(4-(pyrrolidin-1-yl)phenyl)ethan-1-ol (5d)

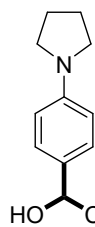

Following general procedure B at the temperature of 90 °C to afford the title compound as a yellow oil (28.4 mg, 62%). TLC (PE: EA, 8:1 v/v):  $R_f = 0.3$ ;  $^1H$  NMR (500 MHz, Chloroform-*d*)  $\delta$  7.25 (d,  $J = 8.1$  Hz, 2H), 6.57 (d,  $J = 8.7$  Hz, 2H), 5.75 (td,  $J = 56.3, 4.8$  Hz, 1H), 4.68 (td,  $J = 10.1, 4.7$  Hz, 1H), 3.30 (t,  $J = 6.6$  Hz, 4H), 2.46 (s, 1H), 2.08 – 1.95 (m, 4H).  $^{13}C$  NMR (125 MHz, Chloroform-*d*)  $\delta$  148.6, 128.4, 122.5, 116.3 (t,  $J = 244.9$  Hz), 111.8, 73.8 (t,  $J = 24.6$  Hz), 47.8, 25.7.  $^{19}F$  NMR (470 MHz, Chloroform-*d*)  $\delta$  -126.90 (ddd,  $J = 283.2, 55.9, 9.8$  Hz), -127.59 (ddd,  $J = 280.3, 55.4, 10.9$  Hz). **HRMS (ESI):** calcd for  $C_{12}H_{16}F_2NO$   $[M + H]^+$ : 228.1194, found: 228.1190.

### 2,2-Difluoro-1-(4-(piperidin-1-yl)phenyl)ethan-1-ol (5e)

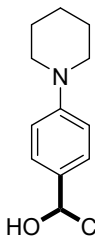

Following general procedure B at the temperature of 90 °C to afford the title compound as a red oil (29.9 mg, 62%). TLC (PE: EA, 2:1 v/v):  $R_f = 0.5$ ;  $^1H$  NMR (500 MHz, Chloroform-*d*)  $\delta$  7.24 (d,  $J = 8.6$  Hz, 2H), 6.91 (d,  $J = 8.7$  Hz, 2H), 5.72 (td,  $J = 56.2, 4.9$  Hz, 1H), 4.68 (td,  $J = 10.2, 4.8$  Hz, 1H), 3.16 (t,  $J = 5.5$  Hz, 4H), 2.71 (s, 1H), 1.70 (p,  $J = 5.8$  Hz, 4H), 1.58 (q,  $J = 5.9$  Hz, 2H).  $^{13}C$  NMR (125 MHz, Chloroform-*d*)  $\delta$  152.6, 128.1, 126.2 (t,  $J = 3.2$  Hz), 116.3, 116.1 (t,  $J = 244.9$  Hz), 73.5 (t,  $J = 24.6$  Hz), 50.4, 25.7, 24.3.  $^{19}F$  NMR (470 MHz, Chloroform-*d*)  $\delta$  -126.65– -127.29 (m), -127.37– -128.01 (m). **HRMS (ESI):** calcd for  $C_{13}H_{18}F_2NO$   $[M + H]^+$ : 242.1350, found: 242.1346.

### 1-(4-(dimethylamino)-2-methoxyphenyl)-2,2-Difluoroethan-1-ol (5f)

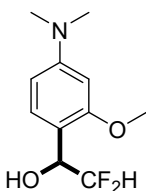

Following general procedure B at the temperature of 90 °C to afford the title compound as a yellow oil (14.3 mg, 31%). TLC (PE: EA, 2:1 v/v):  $R_f = 0.4$ ;  $^1H$  NMR (500 MHz, Chloroform-*d*)  $\delta$  7.16 (d,  $J = 8.5$  Hz, 1H), 6.32 (dd,  $J = 8.5, 2.3$  Hz, 1H), 6.23z (d,  $J = 2.3$  Hz, 1H), 5.94 (td,  $J = 56.5, 4.8$  Hz, 1H), 4.85-4.82 (m, 1H), 3.86 (s, 3H), 2.98 (s, 6H), 1.64 (s, 1H).  $^{13}C$  NMR (125 MHz, Chloroform-*d*)  $\delta$  158.0, 152.2, 129.8, 117.4- 113.5 (m), 111.7-111.6 (m), 104.7, 95.4, 71.8- 71.4 (m), 55.2, 40.5.  $^{19}F$  NMR (470 MHz, Chloroform-*d*)  $\delta$  -125.07 (ddd,  $J = 280.5, 56.2, 7.9$  Hz), -128.61 (ddd,  $J = 280.6, 57.3, 13.9$  Hz). **HRMS (ESI):** calcd for  $C_{11}H_{16}F_2NO_2$   $[M + H]^+$ : 232.1143, found: 232.1141.

**2,2-Difluoro-1-(2,3,6,7-tetrahydro-1H,5H-pyrido[3,2,1-ij]quinolin-9-yl)ethan-1-ol (5g)**

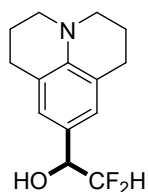

Following general procedure B at the temperature of 90 °C to afford the title compound as a white solid (33.4 mg, 66%). TLC (PE: EA, 2:1 v/v):  $R_f = 0.8$ ;  $^1\text{H NMR}$  (500 MHz, Chloroform-*d*)  $\delta$  6.79 (s, 2H), 5.74 (td,  $J = 56.3, 4.9$  Hz, 1H), 4.59 – 4.54 (m, 1H), 3.14 (t,  $J = 3.6$  Hz, 4H), 2.74 (t,  $J = 6.5$  Hz, 4H), 2.36 (s, 1H), 1.98-1.93 (m, 4H).  $^{13}\text{C NMR}$  (125 MHz, Chloroform-*d*)  $\delta$  143.6, 125.9, 122.7 (t,  $J = 3.2$  Hz), 121.6, 116.2 (t,  $J = 244.8$  Hz), 73.8 (t,  $J = 25.0$  Hz), 50.0, 27.8, 21.9.  $^{19}\text{F NMR}$  (470 MHz, Chloroform-*d*)  $\delta$  -126.59 (ddd,  $J = 282.2, 55.7, 9.0$  Hz), -127.46 (ddd,  $J = 281.4, 56.7, 11.2$  Hz). **HRMS (ESI):** calcd for  $\text{C}_{14}\text{H}_{18}\text{F}_2\text{NO}$   $[\text{M} + \text{H}]^+$ : 254.1350, found:254.1345.

**2,2-Difluoro-1-(4-(methylamino)phenyl)ethan-1-ol (5h)**

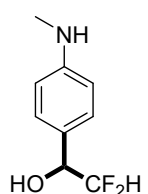

Following general procedure B at the temperature of 90 °C to afford the title compound as a white solid (26.2 mg, 70%). TLC (PE: EA, 2:1 v/v):  $R_f = 0.3$ ;  $^1\text{H NMR}$  (500 MHz, Chloroform-*d*)  $\delta$  7.21 (d,  $J = 8.5$  Hz, 2H), 6.61 (d,  $J = 8.6$  Hz, 2H), 5.73 (td,  $J = 56.2, 4.8$  Hz, 1H), 4.68 (td,  $J = 10.2, 4.8$  Hz, 1H), 2.83 (s, 3H).  $^{13}\text{C NMR}$  (125 MHz, Chloroform-*d*)  $\delta$  150.0, 128.4, 124.4 (t,  $J = 3.3$  Hz), 116.2 (t,  $J = 244.3$  Hz), 112.5, 73.7 (t,  $J = 24.6$  Hz), 30.7.  $^{19}\text{F NMR}$  (470 MHz, Chloroform-*d*)  $\delta$  -127.00 (ddd,  $J = 282.1, 56.3, 9.6$  Hz), -127.67 (ddd,  $J = 281.2, 55.3, 10.4$  Hz). **HRMS (ESI):** calcd for  $\text{C}_9\text{H}_{12}\text{F}_2\text{NO}$   $[\text{M} + \text{H}]^+$ : 188.0881, found:188.0878.

**2,2-Difluoro-1-(3-methyl-5-(methylamino)phenyl)ethan-1-ol (5i)**

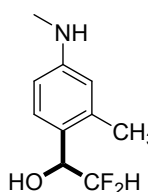

Following general procedure B at the temperature of 90 °C to afford the title compound as a yellow oil (22.1 mg, 55%). TLC (PE: EA, 2:1 v/v):  $R_f = 0.4$ ;  $^1\text{H NMR}$  (500 MHz, Chloroform-*d*)  $\delta$  7.28 (d,  $J = 8.5$  Hz, 1H), 6.50 (dd,  $J = 8.4, 2.5$  Hz, 1H), 6.43 (d,  $J = 2.3$  Hz, 1H), 5.80 (td,  $J = 56.2, 5.2$  Hz, 1H), 5.02-4.97 (m, 1H), 2.83 (s, 3H), 2.32 (s, 3H), 1.59 (s, 1H), 1.25 (s, 1H).  $^{13}\text{C NMR}$  (125 MHz, Chloroform-*d*)  $\delta$  149.5, 137.6, 127.7, 123.0 (t,  $J = 6.0$  Hz), 116.5 (t,  $J = 245.0$  Hz), 114.2, 110.3, 69.8 (t,  $J = 24.9$  Hz), 30.5, 19.6.  $^{19}\text{F NMR}$  (470 MHz, Chloroform-*d*)  $\delta$  -126.12 (ddd,  $J = 282.4, 57.0, 11.7$  Hz), -127.24 (ddd,  $J =$

282.5, 55.4, 8.2 Hz). **HRMS (ESI):** calcd for C<sub>10</sub>H<sub>14</sub>F<sub>2</sub>NO [M + H]<sup>+</sup>: 202.1037, found:202.1035.

#### 1-(4-(dimethylamino)phenyl)-2,2-Difluoroethan-1-ol (5j)

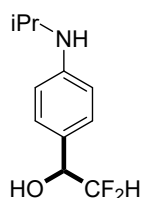

Following general procedure B at the temperature of 90 °C to afford the title compound as a white solid (26.6 mg, 62%). TLC (PE: EA, 2:1 v/v): R<sub>f</sub> = 0.5; <sup>1</sup>H NMR (500 MHz, Chloroform-*d*) δ 7.18 (d, *J* = 8.5 Hz, 2H), 6.57 (d, *J* = 8.6 Hz, 2H), 5.73 (td, *J* = 56.2, 4.8 Hz, 1H), 4.66 (td, *J* = 10.2, 4.8 Hz, 1H), 3.62 (p, *J* = 6.3 Hz, 1H), 1.20 (d, *J* = 6.3 Hz, 6H). <sup>13</sup>C NMR (125 MHz, Chloroform-*d*) δ 148.2, 128.5, 124.1 (t, *J* = 3.4 Hz), 116.2 (t, *J* = 245.0 Hz), 113.2, 73.6 (t, *J* = 24.6 Hz), 44.3, 23.0. <sup>19</sup>F NMR (470 MHz, Chloroform-*d*) δ -126.93 (ddd, *J* = 281.7, 56.3, 9.5 Hz), -127.66 (ddd, *J* = 281.7, 56.3, 10.8 Hz). **HRMS (ESI):** calcd for C<sub>11</sub>H<sub>16</sub>F<sub>2</sub>NO [M + H]<sup>+</sup>: 216.1194, found: 216.1192.

#### 1-(4-(benzylamino)phenyl)-2,2-Difluoroethan-1-ol (5k)

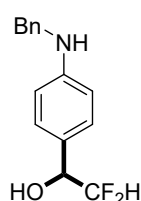

Following general procedure B at the temperature of 90 °C to afford the title compound as a yellow oil (29.4 mg, 56%). TLC (PE: EA, 2:1 v/v): R<sub>f</sub> = 0.5; <sup>1</sup>H NMR (500 MHz, Chloroform-*d*) δ 7.35 (s, 2H), 7.34 (d, *J* = 2.3 Hz, 2H), 7.30-7.26 (m, 1H), 7.19 (d, *J* = 8.4 Hz, 2H), 6.63 (d, *J* = 8.4 Hz, 2H), 5.73 (td, *J* = 56.0, 4.9 Hz, 1H), 4.67 (td, *J* = 10.1, 4.8 Hz, 1H), 4.33 (s, 2H), 4.17 (s, 1H), 2.37 (s, 1H). <sup>13</sup>C NMR (125 MHz, Chloroform-*d*) δ 148.7, 139.0, 128.7, 128.3, 127.4, 127.3, 124.5 (t, *J* = 3.5 Hz), 116.0 (t, *J* = 245.1 Hz), 112.7, 73.5 (t, *J* = 24.5 Hz), 48.1. <sup>19</sup>F NMR (470 MHz, Chloroform-*d*) δ -126.98 (ddd, *J* = 282.9, 55.9, 9.9 Hz), -127.68 (ddd, *J* = 282.7, 57.3, 11.5 Hz). **HRMS (ESI):** calcd for C<sub>15</sub>H<sub>15</sub>F<sub>2</sub>NO [M + H]<sup>+</sup>: 264.1194, found: 264.1190.

#### 4-(2,2-Difluoro-1-hydroxyethyl)-2,6-dimethylphenol (6a)

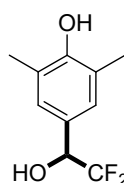

Following general procedure B at the temperature of 90 °C to afford the title compound as a white solid (24.2 mg, 60%). TLC (PE: EA, 2:1 v/v): R<sub>f</sub> = 0.5; <sup>1</sup>H NMR (500 MHz, Methanol-*d*<sub>4</sub>) δ 6.97 (s, 2H), 5.75 (td, *J* = 56.2, 4.7 Hz, 1H), 4.58-4.52 (m, 1H), 2.21 (s, 6H). <sup>13</sup>C NMR (125 MHz, Methanol-*d*<sub>4</sub>) δ 154.6, 129.5 (t, *J* = 3.2 Hz), 128.5, 125.5, 117.8 (t, *J* = 243.8 Hz), 74.2 (t, *J* = 24.3 Hz), 16.7. <sup>19</sup>F NMR (470 MHz, Methanol-*d*<sub>4</sub>) δ -128.26 (ddd, *J* = 281.0, 55.6, 9.6 Hz), -129.11 (ddd, *J* = 281.2, 55.5, 12.0 Hz). **HRMS (ESI):** calcd for C<sub>10</sub>H<sub>11</sub>F<sub>2</sub>O<sub>2</sub> [M + H]<sup>+</sup>: 201.0721, found:201.0721.

### 2-(2,2-Difluoro-1-hydroxyethyl)-4,6-dimethylphenol (6b)

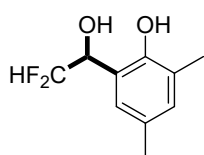

Following general procedure B at the temperature of 60 °C to afford the title compound as a white solid (18.2 mg, 45%). TLC (PE: EA, 2:1 v/v):  $R_f = 0.8$ ;  $^1\text{H NMR}$  (500 MHz,  $\text{DMSO-}d_6$ )  $\delta$  8.36 (s, 1H), 6.97 (s, 1H), 6.85 (s, 1H), 6.13 (d,  $J = 5.4$  Hz, 1H), 5.98 (td,  $J = 55.8$ , 3.6 Hz, 1H), 5.11-5.04 (m, 1H), 2.17 (s, 3H), 2.13 (s, 3H).  $^{13}\text{C NMR}$  (125 MHz,  $\text{DMSO-}d_6$ )  $\delta$  150.3, 130.8, 127.8, 126.1, 124.5, 124.3 (t,  $J = 3.3$  Hz), 116.1 (t,  $J = 243.3$  Hz), 67.4 (t,  $J = 22.9$  Hz), 20.3, 16.5.  $^{19}\text{F NMR}$  (470 MHz,  $\text{DMSO-}d_6$ )  $\delta$  -125.43 (ddd,  $J = 275.4$ , 55.4, 8.2 Hz), -129.51 (ddd,  $J = 275.6$ , 56.3, 16.9 Hz). **HRMS (ESI)**: calcd for  $\text{C}_{10}\text{H}_{11}\text{F}_2\text{O}_2$  [ $\text{M} + \text{H}$ ] $^+$ : 201.0721, found:201.0721.

### 4-(tert-butyl)-2-(2,2-Difluoro-1-hydroxyethyl)phenol (6c)

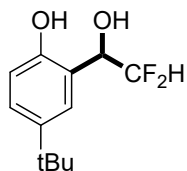

Following general procedure B at the temperature of 60 °C to afford the title compound as a colorless oil (20.2 mg, 44%). TLC (PE: EA, 2:1 v/v):  $R_f = 0.7$ ;  $^1\text{H NMR}$  (500 MHz,  $\text{Chloroform-}d$ )  $\delta$  7.28 (dd,  $J = 8.5$ , 2.5 Hz, 1H), 7.11 (d,  $J = 2.3$  Hz, 1H), 6.98 (s, 1H), 6.82 (d,  $J = 8.5$  Hz, 1H), 5.94 (td,  $J = 55.2$ , 4.7 Hz, 1H), 4.96-4.91 (m, 1H), 1.81 (s, 1H), 1.28 (s, 9H).  $^{13}\text{C NMR}$  (125 MHz,  $\text{Chloroform-}d$ )  $\delta$  153.0, 143.6, 127.5, 126.0, 119.1-119.1 (m), 116.8, 114.9 (t,  $J = 245.6$  Hz), 75.1-74.7 (m), 34.2, 31.6.  $^{19}\text{F NMR}$  (470 MHz,  $\text{Chloroform-}d$ )  $\delta$  -125.83 (ddd,  $J = 284.2$ , 55.2, 7.9 Hz), -128.91 (ddd,  $J = 284.3$ , 57.1, 13.1 Hz). **HRMS (ESI)**: calcd for  $\text{C}_{12}\text{H}_{15}\text{F}_2\text{O}_2$  [ $\text{M} + \text{H}$ ] $^+$ : 229.1034, found:229.1041.

### 1,1'-(5-(tert-butyl)-2-hydroxy-1,3-phenylene)bis(2,2-Difluoroethan-1-ol) (6c')

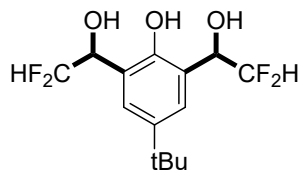

Following general procedure B at the temperature of 60 °C to afford the title compound as a colorless oil (6.5 mg, 11%). TLC (PE: EA, 2:1 v/v):  $R_f = 0.6$ ;  $^1\text{H NMR}$  (500 MHz,  $\text{Chloroform-}d$ )  $\delta$  8.19 (d,  $J = 21.7$  Hz, 1H), 7.19 (s, 2H), 6.96 (td, 2H), 4.97-4.96 (m, 2H), 1.72 (s, 2H), 1.28 (s, 9H).  $^{13}\text{C NMR}$  (125 MHz,  $\text{Chloroform-}d$ )  $\delta$  151.7 (d,  $J = 4.6$  Hz), 143.5, 126.8 (d,  $J = 6.0$  Hz), 120.8-120.8 (m), 120.7-120.7 (m), 114.7 (t,  $J = 245.7$  Hz), 74.2-73.8 (m), 74.1-73.7 (m), 34.2, 31.3.  $^{19}\text{F NMR}$  (470 MHz,  $\text{Chloroform-}d$ )  $\delta$  -125.56 (ddd,  $J = 283.3$ , 54.3, 7.7 Hz), -125.81 (ddd,  $J = 284.1$ , 55.5, 8.8 Hz), -129.33 (ddd,  $J = 284.4$ , 57.2, 14.2 Hz), -129.33 (ddd,  $J = 284.4$ , 56.8, 13.8 Hz). **HRMS (ESI)**: calcd for  $\text{C}_{14}\text{H}_{17}\text{F}_4\text{O}_3$  [ $\text{M} + \text{H}$ ] $^+$ : 309.1108, found:309.1118.



### 3-(2,2-Difluoro-1-hydroxyethyl)-[1,1'-biphenyl]-2-ol (6d)

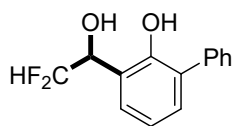

Following general procedure B at the temperature of 60 °C to afford the title compound as a yellow oil (7 mg, 14%). TLC (PE: EA, 2:1 v/v):  $R_f = 0.7$ ;  $^1\text{H NMR}$  (500 MHz, Chloroform-*d*)  $\delta$  7.51 – 7.46 (m, 5H), 7.43 – 7.40 (m, 1H), 7.28 (d,  $J = 7.7$  Hz, 2H), 7.03 (t,  $J = 7.6$  Hz, 1H), 6.04 (td,  $J = 55.4, 4.5$  Hz, 1H), 5.09 – 5.04 (m, 1H).  $^{13}\text{C NMR}$  (125 MHz, Chloroform-*d*)  $\delta$  150.9, 136.5, 131.0, 129.3, 129.2, 129.2, 128.5, 128.1, 121.4 (t,  $J = 3.3$  Hz), 120.8, 114.8 (t,  $J = 245.1$  Hz), 72.9-72.5 (m).  $^{19}\text{F NMR}$  (470 MHz, Chloroform-*d*)  $\delta$  -125.68 (ddd,  $J = 282.8, 55.2, 7.5$  Hz), -129.56 (ddd,  $J = 282.9, 56.5, 14.0$  Hz). **HRMS (ESI)**: calcd for  $\text{C}_{14}\text{H}_{11}\text{F}_2\text{O}_2$  [ $\text{M} + \text{H}$ ] $^+$ : 249.0721, found:249.0730.

### 5-(2,2-Difluoro-1-hydroxyethyl)-[1,1'-biphenyl]-2-ol (6d')

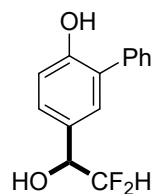

Following general procedure B at the temperature of 60 °C to afford the title compound as a colorless oil (12.5 mg, 25%). TLC (PE: EA, 2:1 v/v):  $R_f = 0.5$ ;  $^1\text{H NMR}$  (500 MHz, Chloroform-*d*)  $\delta$  7.51 – 7.45 (m, 4H), 7.41 (t,  $J = 7.1$  Hz, 1H), 7.31 (d,  $J = 7.0$  Hz, 2H), 7.00 (d,  $J = 9.0$  Hz, 1H), 5.76 (td,  $J = 56.0, 5.0$  Hz, 1H), 5.40 (s, 1H), 4.79 (td,  $J = 10.0, 4.8$  Hz, 1H), 2.50 (s, 1H).  $^{13}\text{C NMR}$  (125 MHz, Chloroform-*d*)  $\delta$  153.1, 136.5, 129.4, 129.2, 129.0, 128.4, 128.2, 128.0, 116.2, 115.8 (t,  $J = 245.2$  Hz), 73.3 (t,  $J = 24.6$  Hz).  $^{19}\text{F NMR}$  (470 MHz, Chloroform-*d*)  $\delta$  -127.36 (dd,  $J = 9.7, 5.3$  Hz), -127.48 (dd,  $J = 9.7, 5.8$  Hz). **HRMS (ESI)**: calcd for  $\text{C}_{14}\text{H}_{11}\text{F}_2\text{O}_2$  [ $\text{M} + \text{H}$ ] $^+$ : 249.0721, found:249.0730.

### 1,1'-(2-hydroxy-[1,1'-biphenyl]-3,5-diyl)bis(2,2-Difluoroethan-1-ol) (6d'')

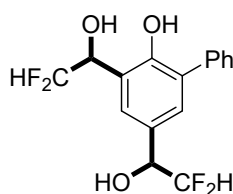

Following general procedure B at the temperature of 60 °C to afford the title compound as a red oil (29.7 mg, 45%). TLC (PE: EA, 2:1 v/v):  $R_f = 0.4$ ;  $^1\text{H NMR}$  (500 MHz, Chloroform-*d*)  $\delta$  7.53 – 7.47 (m, 4H), 7.44 (t,  $J = 7.4$  Hz, 1H), 7.35 (dd,  $J = 5.7, 4.1$  Hz, 2H), 6.67 (d,  $J = 19.7$  Hz, 1H), 6.13 – 5.66 (m, 2H), 5.13 – 5.03 (m, 1H), 4.79 (tt,  $J = 10.0, 4.1$  Hz, 1H), 2.67 (s, 2H).  $^{13}\text{C NMR}$  (125 MHz, Chloroform-*d*)  $\delta$  151.7 (d,  $J = 10.9$  Hz), 136.1 (d,  $J = 3.7$  Hz), 129.9, 129.6 (d,  $J = 8.5$  Hz), 129.2 (d,  $J = 5.3$  Hz), 128.3 (d,  $J = 2.7$  Hz), 128.1 (d,  $J = 5.3$  Hz), 127.1 (d,  $J = 5.0$  Hz), 121.7, 121.6, 115.7 (t,  $J = 245.4$  Hz), 114.6 (t,  $J = 245.4$  Hz), 73.0 (t,  $J = 25.0$  Hz), 72.3 (t,  $J = 24.4$  Hz).  $^{19}\text{F NMR}$  (470 MHz, Chloroform-*d*)  $\delta$  -125.45 – -126.45 (m), -127.19 – -127.80 (m), -

129.49 (ddd,  $J = 149.2, 56.0, 14.1$  Hz), -130.10 (ddd,  $J = 149.2, 55.8, 14.1$  Hz).

**HRMS (ESI):** calcd for  $C_{16}H_{13}F_4O_3$   $[M + H]^+$ : 329.0795, found:329.0806.

**(8R,9S,13S,14S,17R)-2-(2,2-Difluoro-1-hydroxyethyl)-17-ethynyl-13-methyl-7,8,9,11,12,13,14,15,16,17-decahydro-6H-cyclopenta[a]phenanthrene-3,17-diol (6f)**

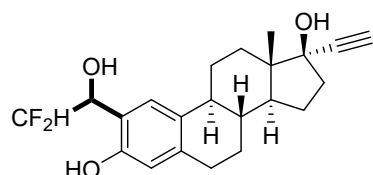

Following general procedure B at the temperature of 60 °C to afford the title compound as a white solid (30.1 mg, 40%). TLC (PE: EA, 2:1  $v/v$ ):  $R_f = 0.3$ ;  $^1H$  NMR (500 MHz,  $DMSO-d_6$ )  $\delta$  9.31 (s, 1H), 7.25 (s, 1H), 6.49 (s, 1H), 5.97 (t,  $J = 55.7$  Hz, 1H), 5.83 (d,  $J = 5.3$  Hz, 1H), 5.34 (s, 1H), 4.98 – 4.95 (m, 1H), 2.69 (s, 2H), 2.30 (s, 1H), 2.10 – 2.06 (m, 2H), 1.86 (t,  $J = 12.7$  Hz, 1H), 1.78 – 1.76 (m, 2H), 1.69 – 1.57 (m, 3H), 1.32 - 1.24 (m, 4H), 0.76 (s, 3H).  $^{13}C$  NMR (125 MHz,  $DMSO-d_6$ )  $\delta$  152.1, 136.8, 130.4 (d,  $J = 7.9$  Hz), 124.9 (d,  $J = 7.6$  Hz), 121.4 (d,  $J = 3.4$  Hz), 116.1 (t,  $J = 243.2$  Hz), 114.7, 89.0 (d,  $J = 2.7$  Hz), 78.1, 75.1, 66.5 (t,  $J = 23.8$  Hz), 49.0, 46.7 (d,  $J = 2.5$  Hz), 43.4 (d,  $J = 13.2$  Hz), 40.4, 38.8, 32.6 (d,  $J = 5.1$  Hz), 28.9 (d,  $J = 12.7$  Hz), 27.0 (d,  $J = 8.8$  Hz), 26.3 (d,  $J = 13.3$  Hz), 22.5, 12.7.  $^{19}F$  NMR (470 MHz,  $DMSO-d_6$ )  $\delta$  -125.41 (dd,  $J = 274.0, 56.2$  Hz), -128.85 – -130.04 (m). **HRMS (ESI):** calcd for  $C_{22}H_{25}F_2O_3$   $[M + H]^+$ : 375.1766, found:375.1762.

**(8R,9S,13S,14S,17R)-2,4-bis(2,2-difluoro-1-hydroxyethyl)-17-ethynyl-13-methyl-7,8,9,11,12,13,14,15,16,17-decahydro-6H-cyclopenta[a]phenanthrene-3,17-diol (6f')**

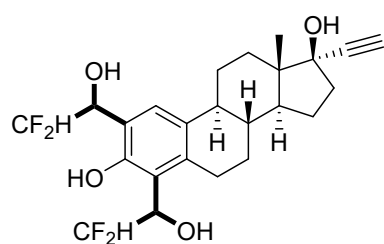

Following general procedure B at the temperature of 60 °C to afford the title compound as a white solid (21.9 mg, 24%). TLC (PE: EA, 2:1  $v/v$ ):  $R_f = 0.2$ ;  $^1H$  NMR (500 MHz,  $DMSO-d_6$ )  $\delta$  7.40 (d,  $J = 5.0$  Hz, 1H), 6.22 (t,  $J = 55.3$  Hz, 1H), 6.05 (t,  $J = 56.4$  Hz, 1H), 5.41 (s, 1H), 5.27 (s, 1H), 5.08 (s, 1H), 2.89 (d,  $J = 16.2$  Hz, 1H), 2.75 – 2.52 (m, 2H), 2.39 (s, 1H), 2.17 (d,  $J = 2.2$  Hz, 2H), 1.96-1.84 (m, 3H), 1.76 – 1.65 (m, 3H), 1.40-1.30 (m, 4H), 0.82 (s, 3H).  $^{13}C$  NMR (125 MHz,  $DMSO-d_6$ )  $\delta$  153.4, 135.7, 131.6, 125.9 (d,  $J = 10.4$  Hz), 122.8, 119.3, 116.4 (t,  $J = 245.6$  Hz), 116.0 (t,  $J = 245.6$  Hz), 89.4, 78.6, 75.6, 69.5, 69.4, 49.5, 47.0 (d,  $J = 1.8$  Hz), 44.2 (d,  $J = 8.9$  Hz), 39.3, 38.7 (d,  $J = 4.6$  Hz), 33.0 (d,  $J = 5.3$  Hz), 27.5, 26.9 (d,

$J = 13.5$  Hz), 26.7, 22.9, 13.1.  $^{19}\text{F}$  NMR (470 MHz,  $\text{DMSO-}d_6$ )  $\delta$  -124.14 – -127.60 (m), -127.93 – -130.59 (m). **HRMS (ESI):** calcd for  $\text{C}_{24}\text{H}_{27}\text{F}_4\text{O}_4$   $[\text{M} + \text{H}]^+$ : 455.1839, found:455.1843.

### 1-(2,2-Difluoro-1-hydroxyethyl)naphthalen-2-ol (6g)

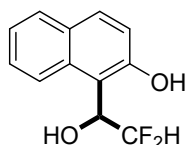

Following general procedure B at the temperature of 60 °C to afford the title compound as a black solid (19.7 mg, 44%). TLC (PE: EA, 4:1 v/v):  $R_f = 0.3$ ;  $^1\text{H}$  NMR (500 MHz, Chloroform- $d$ )  $\delta$  8.47 (s, 1H), 7.77 (t,  $J = 8.7$  Hz, 2H), 7.73 (d,  $J = 8.6$  Hz, 1H), 7.49 (t,  $J = 7.7$  Hz, 1H), 7.35 (t,  $J = 7.5$  Hz, 1H), 7.12 (d,  $J = 8.9$  Hz, 1H), 6.06 (td,  $J = 55.7, 4.4$  Hz, 1H), 5.86 (dt,  $J = 13.8, 5.5$  Hz, 1H), 3.88 (s, 1H).  $^{13}\text{C}$  NMR (125 MHz, Chloroform- $d$ )  $\delta$  155.4, 131.9, 131.4, 129.0, 128.9, 127.3, 123.5, 121.0, 119.5, 114.7 (t,  $J = 246.2$  Hz), 109.6 (t,  $J = 3.2$  Hz), 71.2-70.8 (m).  $^{19}\text{F}$  NMR (470 MHz, Chloroform- $d$ )  $\delta$  -125.47 (ddd,  $J = 282.8, 55.1, 6.7$  Hz), -128.50 (ddd,  $J = 282.8, 56.6, 14.0$  Hz). **HRMS (ESI):** calcd for  $\text{C}_{12}\text{H}_9\text{F}_2\text{O}_2$   $[\text{M} + \text{H}]^+$ : 223.0565, found:223.0570.

### 8-(2,2-Difluoro-1-hydroxyethyl)-7-hydroxy-2-naphthonitrile (6h)

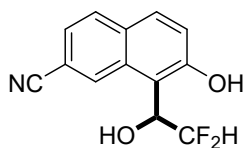

Following general procedure B at the temperature of 60 °C to afford the title compound as a white solid (28.4 mg, 57%). TLC (PE: EA, 2:1 v/v):  $R_f = 0.4$ ;  $^1\text{H}$  NMR (500 MHz,  $\text{DMSO-}d_6$ )  $\delta$  10.67 (s, 1H), 8.52 (d,  $J = 9.0$  Hz, 1H), 8.42 (d,  $J = 1.7$  Hz, 1H), 7.92 (d,  $J = 8.9$  Hz, 1H), 7.66 (dd,  $J = 9.0, 1.8$  Hz, 1H), 7.32 (d,  $J = 8.9$  Hz, 1H), 6.50 (s, 1H), 6.34 (td,  $J = 56.0, 5.0$  Hz, 1H), 5.69 (td,  $J = 13.0, 12.5, 5.0$  Hz, 1H).  $^{13}\text{C}$  NMR (125 MHz,  $\text{DMSO-}d_6$ )  $\delta$  156.4, 134.9, 134.6, 131.1, 127.3, 126.4, 126.3, 119.6, 119.6, 116.2 (t,  $J = 243.8$  Hz), 115.1 (t,  $J = 3.1$  Hz), 104.6, 66.5 (t,  $J = 25.2$  Hz).  $^{19}\text{F}$  NMR (470 MHz,  $\text{DMSO-}d_6$ )  $\delta$  -124.01 (t,  $J = 10.8$  Hz), -124.13 (t,  $J = 10.8$  Hz). **HRMS (ESI):** calcd for  $\text{C}_{13}\text{H}_8\text{F}_2\text{NO}_2$   $[\text{M} + \text{H}]^+$ : 248.0517, found:248.0526.

### 5-(2,2-Difluoro-1-hydroxyethyl)pyrimidine-2,4(1H,3H)-dione (8a)

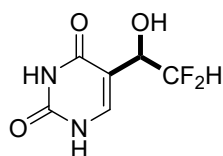

Following general procedure C at the temperature of 100 °C to afford the title compound as a white solid (32.6 mg, 85%). TLC (PE: EA, 1:2 v/v):  $R_f = 0.3$ ;  $^1\text{H}$  NMR (500 MHz, Methanol- $d_4$ )  $\delta$  7.48 (s, 1H), 5.97 (td,  $J = 56.0, 3.3$  Hz, 1H), 4.76-4.70 (m, 1H).  $^{13}\text{C}$  NMR (125 MHz, Methanol- $d_4$ )  $\delta$  165.5, 153.1, 142.1, 116.2 (t,  $J = 243.4$  Hz), 110.0 (t,  $J = 3.6$  Hz), 67.6 (t,  $J = 24.3$  Hz).  $^{19}\text{F}$  NMR (470 MHz, Methanol- $d_4$ )  $\delta$  -

129.88 (ddd,  $J = 281.2, 55.6, 7.7$  Hz), -133.04 (ddd,  $J = 281.3, 56.2, 15.5$  Hz). **HRMS (ESI)**: calcd for  $C_6H_5F_2N_2O_3$  [ $M + H$ ] $^-$ : 191.0262, found:191.0260.

**5-(2,2-Difluoro-1-hydroxyethyl)-6-methylpyrimidine-2,4(1H,3H)-dione (8b)**

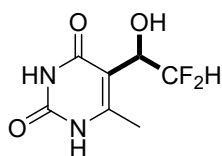

Following general procedure C at the temperature of 100 °C to afford the title compound as a white solid (30.5 mg, 74%). TLC (PE: EA, 1:2 v/v):  $R_f = 0.2$ ;  $^1H$  NMR (500 MHz, Chloroform-*d*)  $\delta$  6.11 (td,  $J = 56.8, 5.4$  Hz, 1H), 4.84 – 4.79 (m, 1H), 2.27 (s, 3H).  $^{13}C$  NMR (125 MHz, Chloroform-*d*)  $\delta$  166.2, 154.8, 152.7, 116.9 (t,  $J = 242.2$  Hz), 107.1 (t,  $J = 3.7$  Hz), 68.5 (t,  $J = 27.3$  Hz), 16.7.  $^{19}F$  NMR (470 MHz, Chloroform-*d*)  $\delta$  -123.49 (ddd,  $J = 284.2, 57.0, 11.7$  Hz), -123.61 (ddd,  $J = 285.7, 56.6, 10.0$  Hz). **HRMS (ESI)**: calcd for  $C_7H_7F_2N_2O_3$  [ $M + H$ ] $^-$ : 205.0419, found:205.0424.

#### 4 Gram-scale Synthesis of product **3b**

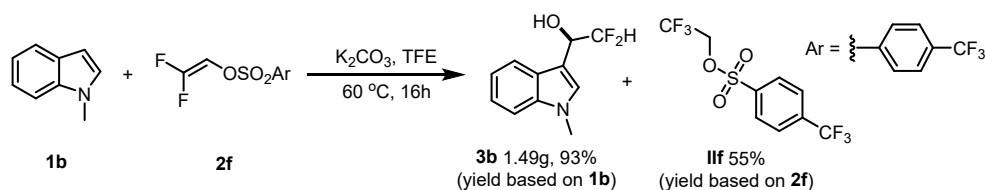

In an oven-dried 100 ml round bottom flask, a mixture of 1-methylindole **1b** (7.6 mmol, 1.0 equiv), 2,2-Difluorovinyl 4-(trifluoromethyl)benzenesulfonate **2f** (4.380 g, 15.2 mmol, 2 equiv),  $\text{K}_2\text{CO}_3$  (525.2 mg, 3.8 mmol, 0.5 equiv) in TFE (20 ml) was stirred at 60 °C for 16 h. The reaction mixture was then diluted with Ethyl acetate (30 ml) and washed with brine. The aqueous phase was extracted with Ethyl acetate. The organic layers were combined, washed with brine and dried over  $\text{Na}_2\text{SO}_4$ . The solvent was removed in vacuo, and the residue was purified by column chromatography (PE/EA= 4/1) to afford the desired 1.49 g of product **3b**, yield 93% and product **IIIf**, yield 55%.

## 5 Derivatization of product 3b and Characterization Data of Compounds 9-13.

### 5.1 Compound 9

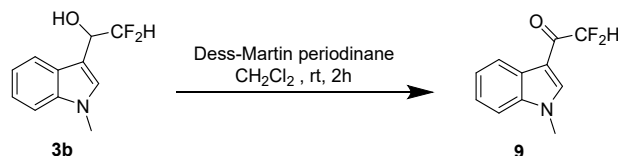

In an oven-dried Pressure tube, a mixture of 2,2-Difluoro-1-(1-methyl-1H-indol-3-yl)ethan-1-ol **3b** (0.2 mmol, 1.0 equiv), Dess-Martin periodinane (313.8 mg, 0.74 mmol, 3.7 equiv), in CH<sub>2</sub>Cl<sub>2</sub> (5 ml) was stirred at room temperature for 2 h. The reaction mixture was then diluted with ethyl acetate (10 ml) and washed with brine. The aqueous phase was extracted with Ethyl acetate. The organic layers were combined, washed with brine and dried over Na<sub>2</sub>SO<sub>4</sub>. The solvent was removed in vacuo, and the residue was purified by column chromatography (PE/EA= 4/1) to afford the desired 14 mg of product **9**, yield 53%.<sup>2</sup>

### 2,2-Difluoro-1-(1-methyl-1H-indol-3-yl)ethan-1-one (9)

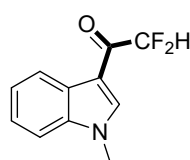

According to the above procedure and provide the title compound as a yellow oil (22.2 mg, 53%). TLC (PE: EA, 4:1 v/v): R<sub>f</sub> = 0.4; <sup>1</sup>H NMR (500 MHz, Chloroform-*d*) δ 8.41 – 8.39 (m, 1H), 8.00 (s, 1H), 7.39 – 7.35 (m, 3H), 6.10 (t, *J* = 54.3 Hz, 1H), 3.89 (s, 3H). <sup>13</sup>C NMR (125 MHz, Chloroform-*d*) δ 182.8 (t, *J* = 25.3 Hz), 137.9 (t, *J* = 7.1 Hz), 137.2, 126.9, 124.3, 123.6, 122.6, 112.2 (t, *J* = 254.0 Hz), 110.4 (t, *J* = 2.1 Hz), 109.9, 33.9. <sup>19</sup>F NMR (470 MHz, Chloroform-*d*) δ -112.25- -120.00 (m), -120.11- -126.03 (m). **HRMS (ESI)**: calcd for C<sub>11</sub>H<sub>10</sub>F<sub>2</sub>NO [M + H]<sup>+</sup>: 210.0724, found:210.0722.

### 5.2 Compound 10

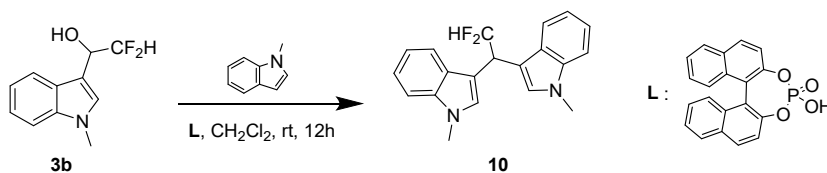

In an oven-dried Pressure tube, a mixture of 2,2-Difluoro-1-(1-methyl-1H-indol-3-yl)ethan-1-ol **3b** (0.2 mmol, 1.0 equiv), 1-Methyl-1H-indole (26.2 mg, 0.2

mmol, 1 equiv), 1,1'-Binaphthyl-2,2'-diyl hydrogenphosphate (6.9mg, 0.02 mmol, 0.1 equiv) in CH<sub>2</sub>Cl<sub>2</sub> (1 ml) was stirred at room temperature for 12 h. The reaction mixture was then diluted with ethyl acetate (10 ml) and washed with brine. The aqueous phase was extracted with Ethyl acetate. The organic layers were combined, washed with brine and dried over Na<sub>2</sub>SO<sub>4</sub>. The solvent was removed in vacuo, and the residue was purified by column chromatography (PE/EA= 4/1) to afford the desired 35.7 mg of product **10**, yield 55%.<sup>2,3</sup>

### 3,3'-(2,2-Difluoroethane-1,1-diyl)bis(1-methyl-1H-indole) (**10**)

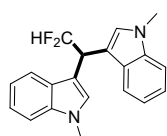

According to the above procedure and provide the title compound as a yellow oil (35.6 mg, 55%). TLC (PE: EA, 4:1 v/v):  $R_f = 0.6$ ; <sup>1</sup>H NMR (500 MHz, Chloroform-*d*)  $\delta$  7.66 (d,  $J = 7.9$  Hz, 2H), 7.36 (d,  $J = 8.1$  Hz, 2H), 7.29 (t,  $J = 7.6$  Hz, 2H), 7.15 (t,  $J = 7.1$  Hz, 2H), 7.07 (s, 2H), 6.39 (tt,  $J = 26.7, 3.0$  Hz, 1H), 5.08 (td,  $J = 16.3, 2.9$  Hz, 1H), 3.77 (s, 6H). <sup>13</sup>C NMR (125 MHz, Chloroform-*d*)  $\delta$  136.9, 128.0, 127.5, 121.7, 119.3, 119.1, 117.2 (t,  $J = 245.0$  Hz), 110.2 (t,  $J = 3.6$  Hz), 109.3, 38.4 (t,  $J = 22.1$  Hz), 32.8. <sup>19</sup>F NMR (470 MHz, Chloroform-*d*)  $\delta$  -117.61 (d,  $J = 16.1$  Hz), -117.73 (d,  $J = 16.5$  Hz). **HRMS (ESI)**: calcd for C<sub>20</sub>H<sub>18</sub>F<sub>2</sub>N<sub>2</sub>Na [M + Na]<sup>+</sup>: 347.1330, found:347.1326.

### 5.3 Compound **11**

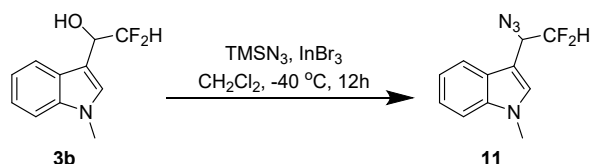

In an oven-dried Pressure tube, a mixture of 2,2-Difluoro-1-(1-methyl-1H-indol-3-yl)ethan-1-ol **3b** (0.2 mmol, 1.0 equiv), TMSN<sub>3</sub> (34.6 mg, 0.3 mmol, 1.5 equiv), InBr<sub>3</sub> (35.5mg, 0.1 mmol, 0.5 equiv) in CH<sub>2</sub>Cl<sub>2</sub> (1 ml) was stirred at -40°C for 12 h. The reaction mixture was then diluted with ethyl acetate (10 ml). The aqueous phase was extracted with Ethyl acetate. The organic layers were combined and dried over Na<sub>2</sub>SO<sub>4</sub>. The solvent was removed in vacuo, and the residue was purified by column chromatography (PE/EA= 4/1) to afford the desired 19 mg of product **11**, yield 57%.<sup>4</sup>

### 3-(1-azido-2,2-Difluoroethyl)-1-methyl-1H-indole (**11**)

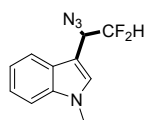

According to the above procedure and provide the title compound as a yellow oil (26.9 mg, 57%). TLC (PE: EA, 4:1 *v/v*):  $R_f = 0.7$ ;  $^1\text{H NMR}$  (500 MHz, Chloroform-*d*)  $\delta$  7.66 (d,  $J = 8.0$  Hz, 1H), 7.35 (d,  $J = 8.2$  Hz, 1H), 7.30 (t,  $J = 7.6$  Hz, 1H), 7.20 (s, 1H), 7.19 (t,  $J = 7.3$  Hz, 1H), 6.00 (td,  $J = 55.6, 3.8$  Hz, 1H), 4.97 (td,  $J = 12.5, 3.7$  Hz, 1H), 3.80 (s, 3H).  $^{13}\text{C NMR}$  (125 MHz, Chloroform-*d*)  $\delta$  137.0, 128.7, 126.6, 122.6, 120.3, 118.9, 114.9 (t,  $J = 246.3$  Hz), 109.8, 104.7 (t,  $J = 3.1$  Hz), 59.6 (t,  $J = 24.0$  Hz), 33.1.  $^{19}\text{F NMR}$  (470 MHz, Chloroform-*d*)  $\delta$  -122.32 (ddd,  $J = 279.3, 55.5, 12.0$  Hz), -123.78 (ddd,  $J = 279.4, 55.5, 13.3$  Hz). **HRMS (ESI)**: calcd for  $\text{C}_{11}\text{H}_{11}\text{F}_2\text{N}_4$   $[\text{M} + \text{H}]^+$ : 237.0946, found:237.0944.

## 5.4 Compound 12

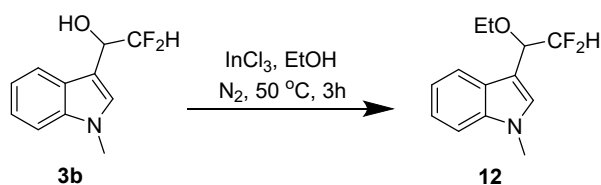

In an oven-dried Pressure tube, a mixture of 2,2-Difluoro-1-(1-methyl-1H-indol-3-yl)ethan-1-ol **3b** (0.2 mmol, 1.0 equiv),  $\text{InCl}_3$  (8.4 mg, 0.04 mmol, 0.2 equiv) in EtOH (1 ml) was stirred at 50°C with nitrogen protection for 3h. The reaction mixture was then diluted with ethyl acetate (10 ml). The aqueous phase was extracted with Ethyl acetate. The organic layers were combined and dried over  $\text{Na}_2\text{SO}_4$ . The solvent was removed in vacuo, and the residue was purified by column chromatography (PE/EA= 32/1) to afford the desired 26.3 mg of product **12**, yield 75%.<sup>4</sup>

### 3-(1-ethoxy-2,2-Difluoroethyl)-1-methyl-1H-indole (12)

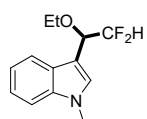

According to the above procedure and provide the title compound as a yellow oil (33.9 mg, 75%). TLC (PE: EA, 32:1 *v/v*):  $R_f = 0.3$ ;  $^1\text{H NMR}$  (500 MHz, Chloroform-*d*)  $\delta$  7.73 (d,  $J = 8.0$  Hz, 1H), 7.33 (d,  $J = 8.2$  Hz, 1H), 7.26 (t,  $J = 7.9$  Hz, 1H), 7.15 (t,  $J = 7.5$  Hz, 1H), 7.13 (s, 1H), 5.98 (td,  $J = 56.1, 4.5$  Hz, 1H), 4.76 (td,  $J = 10.8, 4.5$  Hz, 1H), 3.80 (s, 3H), 3.61 – 3.49 (m, 2H), 1.21 (t,  $J = 7.0$  Hz, 3H).  $^{13}\text{C NMR}$  (125 MHz, Chloroform-*d*)  $\delta$  137.2, 128.8, 127.0, 122.1, 119.8, 117.1-113.2 (m), 109.5, 108.2-108.1 (m), 77.2, 75.4-75.0 (m), 64.7, 32.9, 15.2.  $^{19}\text{F NMR}$  (470 MHz, Chloroform-*d*)  $\delta$  -124.78 (ddd,  $J = 282.3, 56.8, 10.6$  Hz), -



125.95 (ddd,  $J = 282.3, 56.8, 12.1$  Hz). **HRMS (ESI):** calcd for  $C_{13}H_{16}F_2NO$   $[M + H]^+$ : 226.1037, found:226.1034.

### 5.5 Compound 13

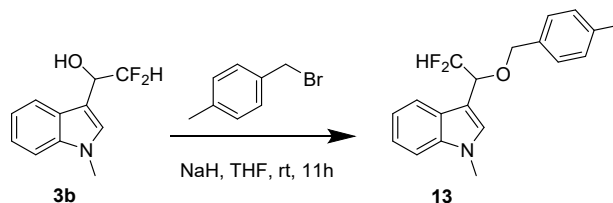

In an oven-dried Pressure tube, a mixture of 2,2-Difluoro-1-(1-methyl-1H-indol-3-yl)ethan-1-ol **3b** (0.2 mmol, 1.0 equiv), p-Methylbenzyl bromide (44.4 mg, 0.24 mmol, 1.2 equiv), NaH (19.2 mg, 0.8 mmol, 4 equiv) in dry THF (1 ml) was stirred at room temperature for 1h. The reaction mixture was then diluted with ethyl acetate (10 ml). The aqueous phase was extracted with Ethyl acetate. The organic layers were combined and dried over  $Na_2SO_4$ . The solvent was removed in vacuo, and the residue was purified by column chromatography (PE/EA= 32/1) to afford the desired 20 mg of product **13**, yield 52%.

#### 3-(2,2-Difluoro-1-((4-methylbenzyl)oxy)ethyl)-1-methyl-1H-indole (**13**)

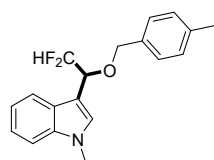

According to the above procedure and provide the title compound as a yellow oil (35.1 mg, 52%). TLC (PE: EA, 32:1 v/v):  $R_f = 0.2$ ;  $^1H$  NMR (500 MHz, Chloroform-*d*)  $\delta$  7.71 (d,  $J = 8.0$  Hz, 1H), 7.34 (d,  $J = 8.2$  Hz, 1H), 7.27 (t,  $J = 7.6$  Hz, 1H), 7.23 – 7.12 (m, 6H), 6.00 (td,  $J = 56.1, 4.5$  Hz, 1H), 4.80 (td,  $J = 10.9, 4.5$  Hz, 1H), 4.61 (d,  $J = 11.7$  Hz, 1H), 4.38 (d,  $J = 11.7$  Hz, 1H), 3.79 (s, 3H), 2.34 (s, 3H).  $^{13}C$  NMR (125 MHz, Chloroform-*d*)  $\delta$  137.6, 137.4, 134.7, 129.3, 129.2, 128.2, 127.1, 122.3, 120.0, 120.0, 115.3(t,  $J = 247.1$  Hz), 109.7, 107.6(d,  $J = 1.7$  Hz), 74.1 (t,  $J = 25.2$  Hz), 70.3, 33.1, 21.3.  $^{19}F$  NMR (470 MHz, Chloroform-*d*)  $\delta$  -124.39 (ddd,  $J = 282.3, 56.4, 10.4$  Hz), -125.95 (ddd,  $J = 282.0, 56.1, 11.6$  Hz). **HRMS (ESI):** calcd for  $C_{19}H_{19}F_2NONa$   $[M + Na]^+$ : 338.1326, found:338.1320.

## 6 Mechanism Study

### 6.1 Free radical inhibition experiment

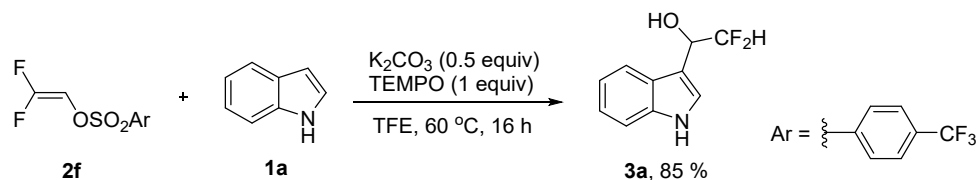

In an oven-dried Pressure tube, a mixture of Indoles **1a** (0.2 mmol, 1.0 equiv), 2,2-Difluorovinyl 4-(trifluoromethyl)benzenesulfonate **2f** (115.3 mg, 0.4 mmol, 2 equiv), TEMPO (31.2 mg, 0.2 mmol, 1 equiv),  $K_2CO_3$  (13.8 mg, 0.1 mmol, 0.5 equiv) in TFE (1 ml) was stirred at 60 °C for 16 h. The reaction mixture was then diluted with Ethyl acetate (10 ml) and washed with brine. The aqueous phase was extracted with ethyl acetate. The organic layers were combined, washed with brine and dried over  $Na_2SO_4$ . The pure product was purified by flash column chromatography on silica with an appropriate solvent to afford the pure product **3a**, yield: 85%.

### 6.2 Reaction solvent screening

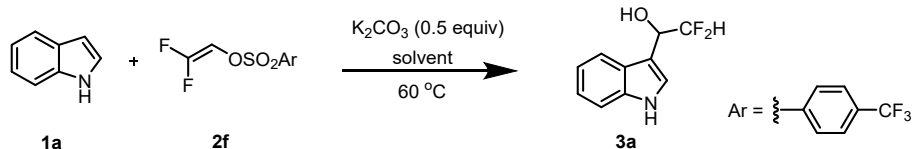

In an oven-dried Pressure tube, a mixture of Indoles **1a** (0.2 mmol, 1.0 equiv), 2,2-Difluorovinyl 4-(trifluoromethyl)benzenesulfonate **2f** (115.3 mg, 0.4 mmol, 2 equiv),  $K_2CO_3$  (13.8 mg, 0.1 mmol, 0.5 equiv) in different solvent, Solvents include MeOH, EtOH, TFE and HFIP, the reaction was stirred at 60 °C. TLC monitoring reaction.

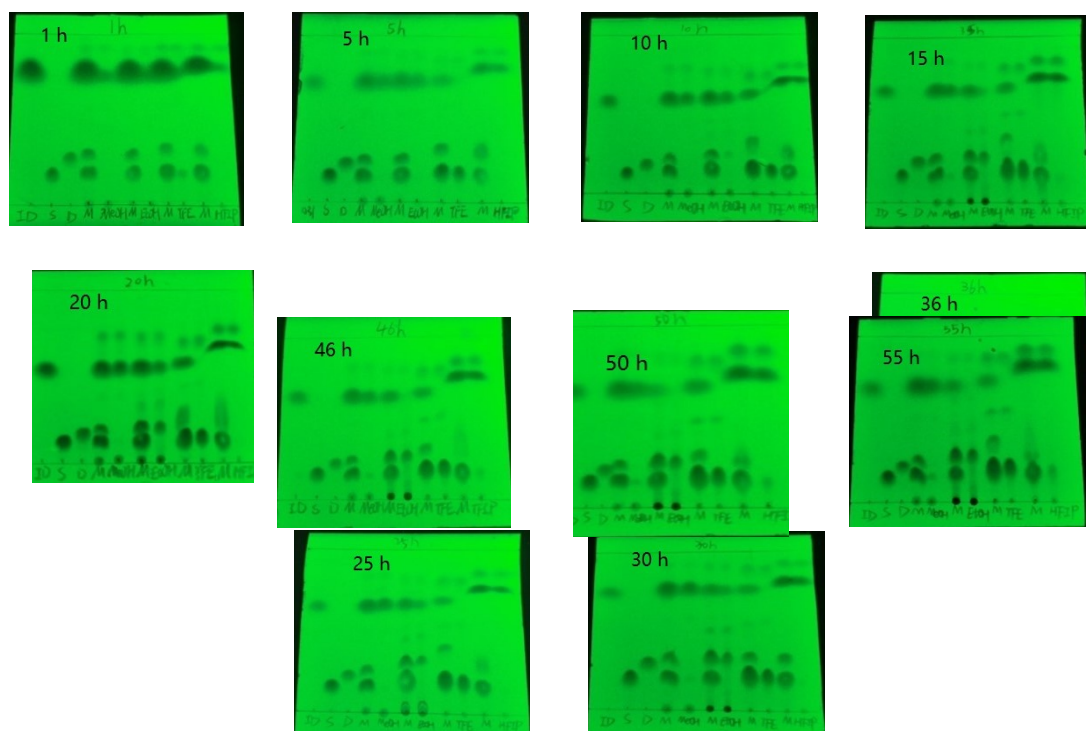

Fig 1: TLC monitoring reaction

(ID: Indole, S: **3a**, D: 3,3'-(2,2-difluoroethane-1,1-diyl)bis(1H-indole), M: Mixing point, MeOH, EtOH, TFE and HFIP represents the reaction of different solvents)

### 6.3 Effect of trifluoroethanol

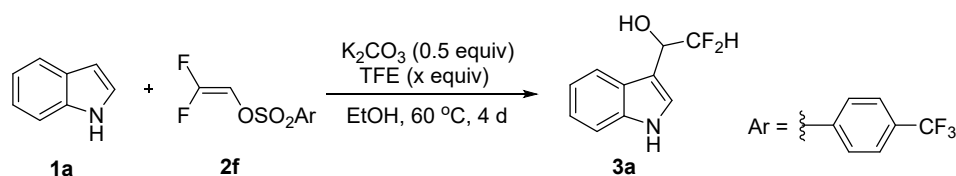

In an oven-dried Pressure tube, a mixture of Indoles **1a** (0.2 mmol, 1.0 equiv), 2,2-Difluorovinyl 4-(trifluoromethyl)benzenesulfonate (115.3 mg, 0.4 mmol, 2 equiv), TFE (x equiv),  $\text{K}_2\text{CO}_3$  (13.8 mg, 0.1 mmol, 0.5 equiv) in EtOH (1 ml) was stirred at 60 °C for 4 days. The reaction mixture was then diluted with Ethyl acetate (10 ml) and washed with brine. The aqueous phase was extracted with ethyl acetate. The organic layers were combined, washed with brine and dried over  $\text{Na}_2\text{SO}_4$ . The pure product was purified by flash column

chromatography on silica with an appropriate solvent to afford the pure product **3a**.

Table 1 Effect of trifluoroethanol on Yield

| TFE (x equiv) | Yield |
|---------------|-------|
| 0             | 0     |
| 10            | 9 %   |
| 20            | 14 %  |
| 30            | 19 %  |
| 40            | 22 %  |

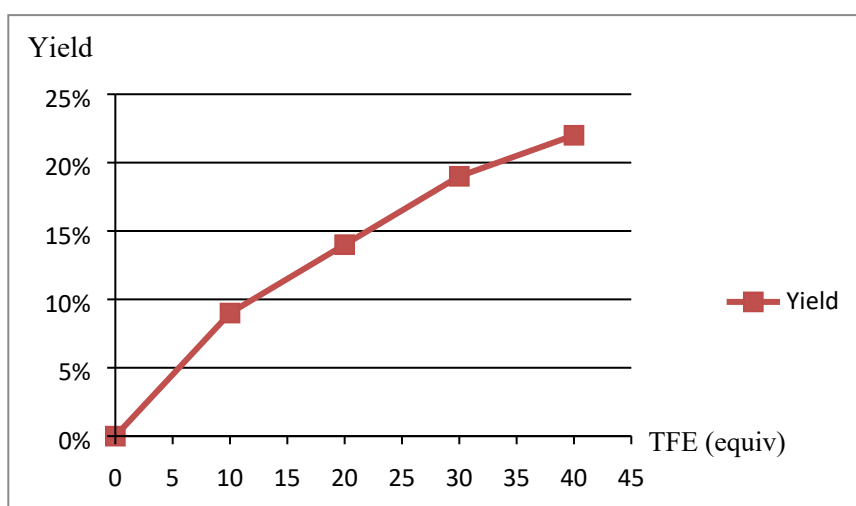

Fig. 2 Effect of trifluoroethanol on Yield

#### 6.4 Deuterium experiment

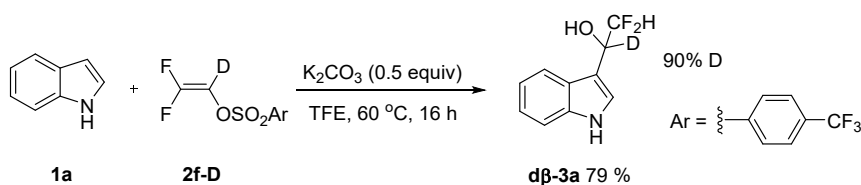

In an oven-dried Pressure tube, a mixture of Indoles **1a** (0.2 mmol, 1.0 equiv), 2,2-Difluorovinyl-1-D 4-(trifluoromethyl)benzenesulfonate **2f-D** (114.8 mg, 0.4 mmol, 2 equiv),  $K_2CO_3$  (13.8 mg, 0.1 mmol, 0.5 equiv) in TFE (1 ml) was stirred at 60 °C for 16 h. The reaction mixture was then diluted with Ethyl acetate (10 ml) and washed with brine. The aqueous phase was extracted with

ethyl acetate. The organic layers were combined, washed with brine and dried over Na<sub>2</sub>SO<sub>4</sub>. The pure product was purified by flash column chromatography on silica with an appropriate solvent to afford the pure product **dβ-3a**, yield: 79%.

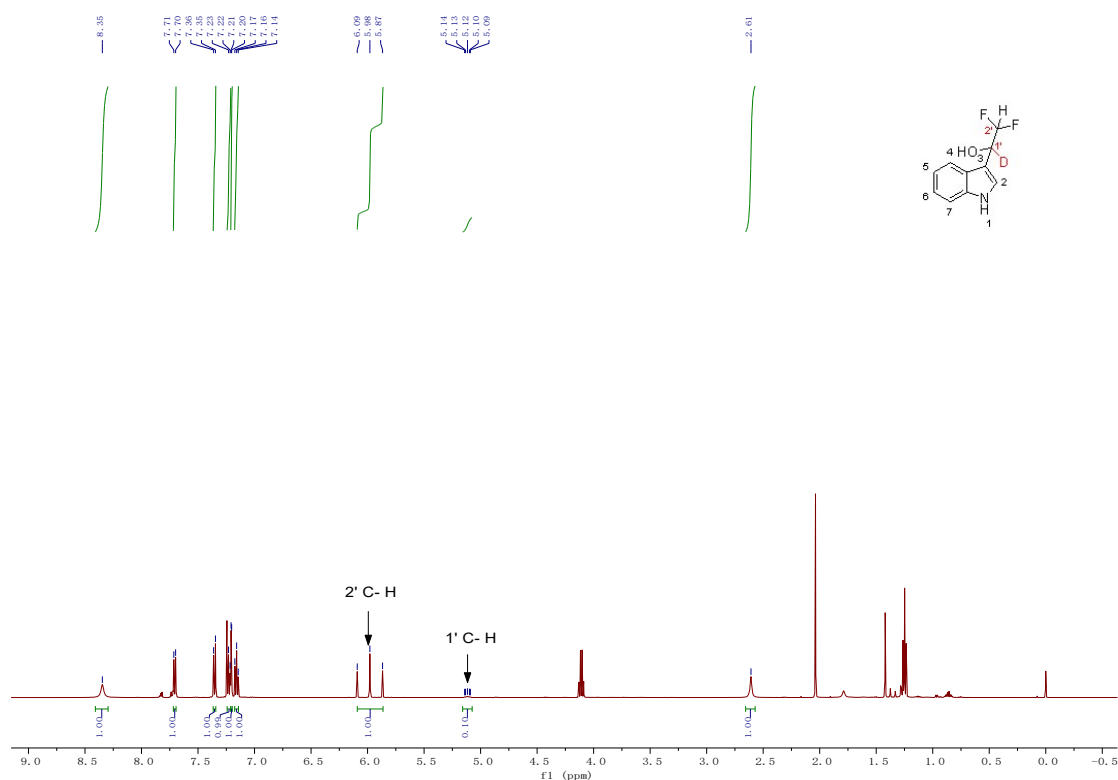

Supplementary scheme 5 <sup>1</sup>H NMR spectra for compound **dβ-3a**.

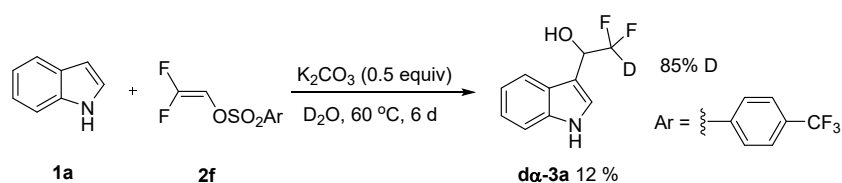

In an oven-dried Pressure tube, a mixture of Indoles **1a** (0.2 mmol, 1.0 equiv), 2,2-Difluorovinyl 4-(trifluoromethyl)benzenesulfonate (115.3mg, 0.4 mmol, 2 equiv), K<sub>2</sub>CO<sub>3</sub> (13.8 mg, 0.1 mmol, 0.5 equiv) in D<sub>2</sub>O (1 ml) was stirred at 60 °C for 6 days. The reaction mixture was then diluted with Ethyl acetate (10 ml) and washed with brine. The aqueous phase was extracted with ethyl acetate. The organic layers were combined, washed with brine and dried over Na<sub>2</sub>SO<sub>4</sub>. The pure product was purified by flash column chromatography on silica with

an appropriate solvent to afford the pure product **da-3a**, yield: 12%.

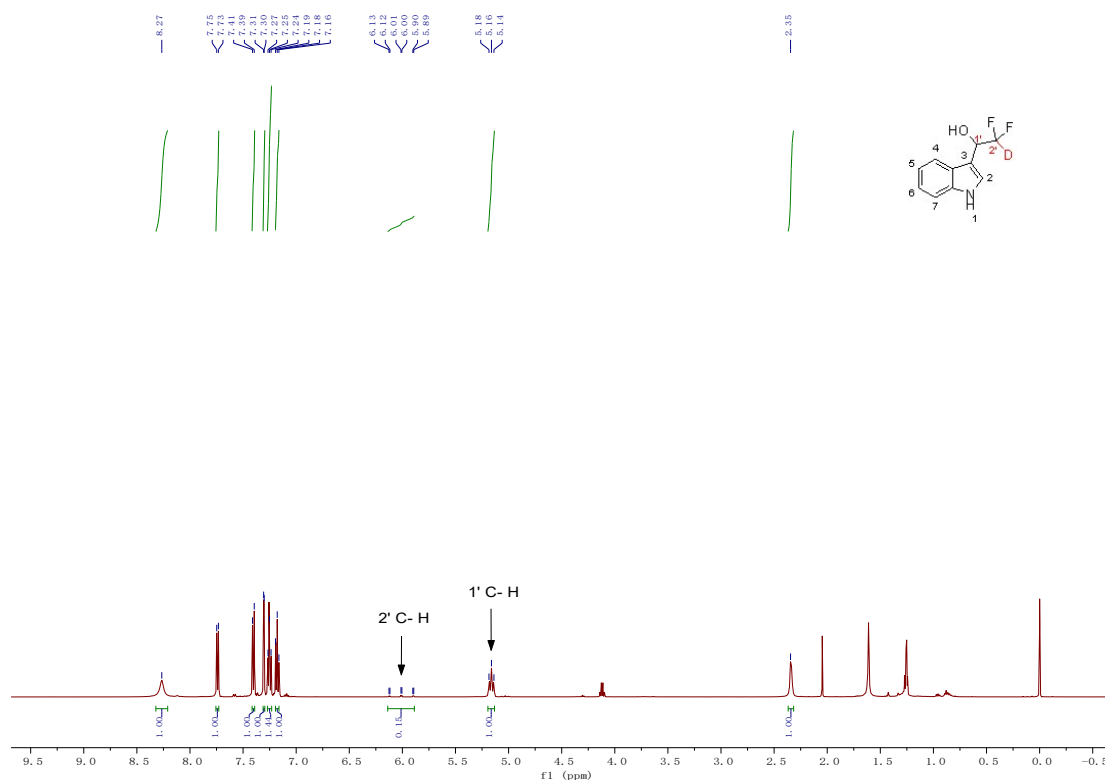

Supplementary scheme 5 <sup>1</sup>H NMR spectra for compound **da-3a**.

## 6.5 Capture of active difluoroacetaldehyde intermediate

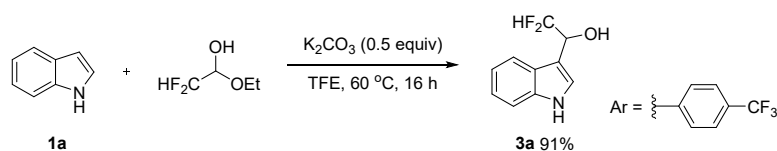

In an oven-dried Pressure tube, a mixture of Indoles **1a** (0.2 mmol, 1.0 equiv), 1-ethoxy-2,2-difluoroethan-1-ol (0.4 mmol, 2 equiv),  $K_2CO_3$  (13.8 mg, 0.1 mmol, 0.5 equiv) in TFE (1 ml) was stirred at 60 °C for 16 h. The reaction mixture was then diluted with Ethyl acetate (10 ml) and washed with brine. The aqueous phase was extracted with ethyl acetate. The organic layers were combined, washed with brine and dried over  $Na_2SO_4$ . The pure product was purified by flash column chromatography on silica with an appropriate solvent to afford the pure product **3a**, yield: 91%.

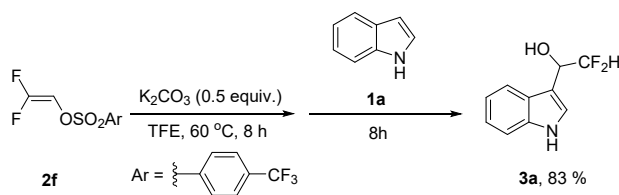

In an oven-dried Pressure tube, a mixture of 2,2-Difluorovinyl 4-(trifluoromethyl)benzenesulfonate **2f** (115.3 mg, 0.4 mmol, 2 equiv),  $\text{K}_2\text{CO}_3$  (13.8 mg, 0.1 mmol, 0.5 equiv) in TFE (1 ml) was stirred at 60 °C for 8 h. Then Indoles **1a** (0.2 mmol, 1.0 equiv) were added. The mixture was stirred at 60 °C for 8 h. The reaction mixture was then diluted with Ethyl acetate (10 ml) and washed with brine. The aqueous phase was extracted with ethyl acetate. The organic layers were combined, washed with brine and dried over  $\text{Na}_2\text{SO}_4$ . The pure product was purified by flash column chromatography on silica with an appropriate solvent to afford the pure product **3a**, yield: 83%.

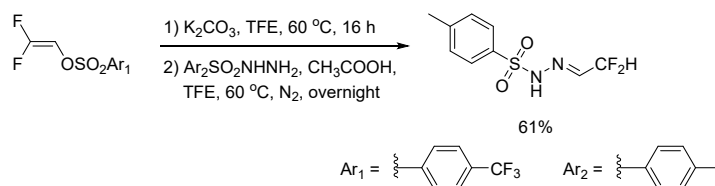

In an oven-dried Pressure tube, a mixture of 2,2-Difluorovinyl 4-(trifluoromethyl)benzenesulfonate (115.3 mg, 0.4 mmol, 2 equiv),  $\text{K}_2\text{CO}_3$  (13.8 mg, 0.1 mmol, 0.5 equiv) in TFE (1 ml) was stirred at 60 °C for 16 h. Then  $\text{CH}_3\text{COOH}$  (800  $\mu\text{l}$ ), P-toluenesulfonyl hydrazide (37.24 mg, 0.2 mmol, 1 equiv) were added dropwise under  $\text{N}_2$  atmosphere. Then the mixture was transferred to 60 °C and stirred for overnight,<sup>5</sup> and monitored by TLC (PE:EA=4:1). The pure product was purified by flash column chromatography on silica with an appropriate solvent to afford the product Difluoroacetaldehyde N-tosylhydrazone, yield: 61%. The index of this compound is consistent with the reference.

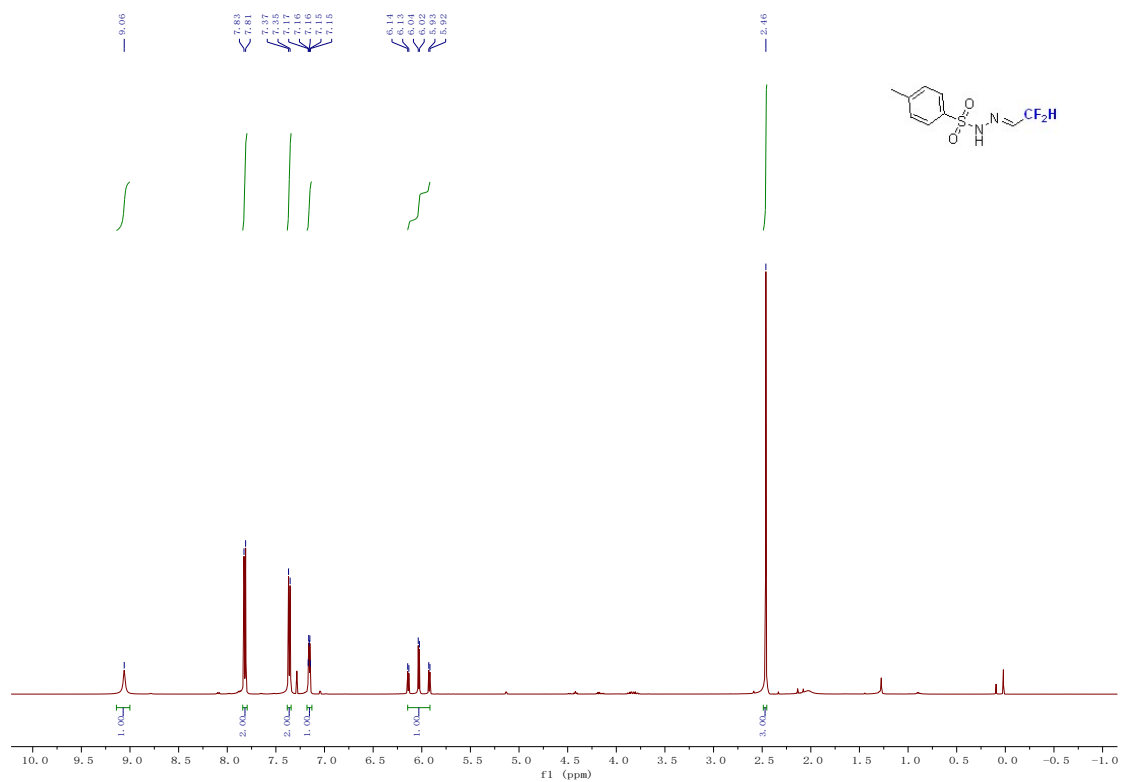

**Supplementary scheme 5**  $^1\text{H}$  NMR spectra for product Difluoroacetaldehyde N-tosylhydrazone.



## 7 References

1. (a) Gøgsig, T. M.; Søbjerg, L. S.; Lindhardt (né Hansen), A. T.; Jensen, K. L.; Skrydstrup, T.; *J. Org. Chem.* **2008**, *73*, 3404. (b) Zhang, B.; Zhang, X. *Chem. Commun.* **2016**, *52*, 1238.
2. Xu Z, Hang Z, Chai L, Liu ZQ. *Org Lett.* **2016**, *18*, 4662.
3. Wang W, Xiong W, Wang J, Wang QA, Yang W. Brønsted. *J Org Chem.* **2020**, *85*, 4398.
4. Guo, S., Chen, J., Yi, M., Dong, L., Lin, A., Yao, H. *Org. Chem. Front.* **2021**, *8*, 1783.
5. Bi, X., Gai, Y., Zhang, X., Dong, Y., Sivaguru, P., Wang, Y., Ning, Y. *Angew Chem Int Ed Engl.* **2020**, *59*, 6473.

## 8 <sup>1</sup>H, <sup>13</sup>C and <sup>19</sup>F NMR Spectra of Synthesized Compounds

<sup>1</sup>H NMR (500 MHz, Chloroform-*d*) spectra of **3a**

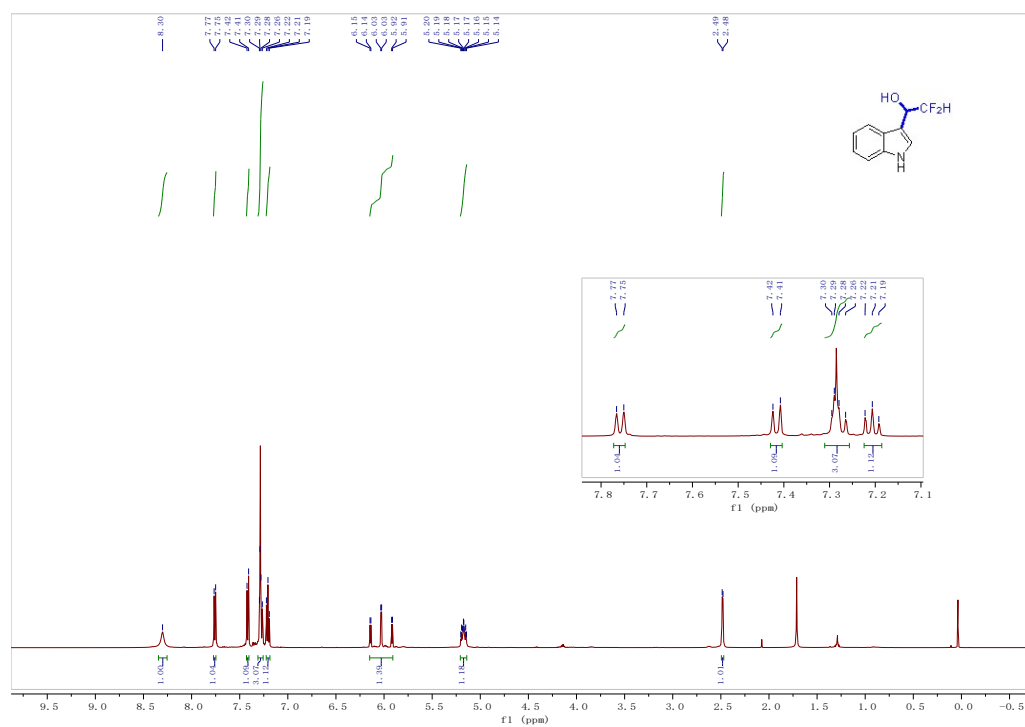

<sup>13</sup>C NMR (125 MHz, Chloroform-*d*) spectra of **3a**

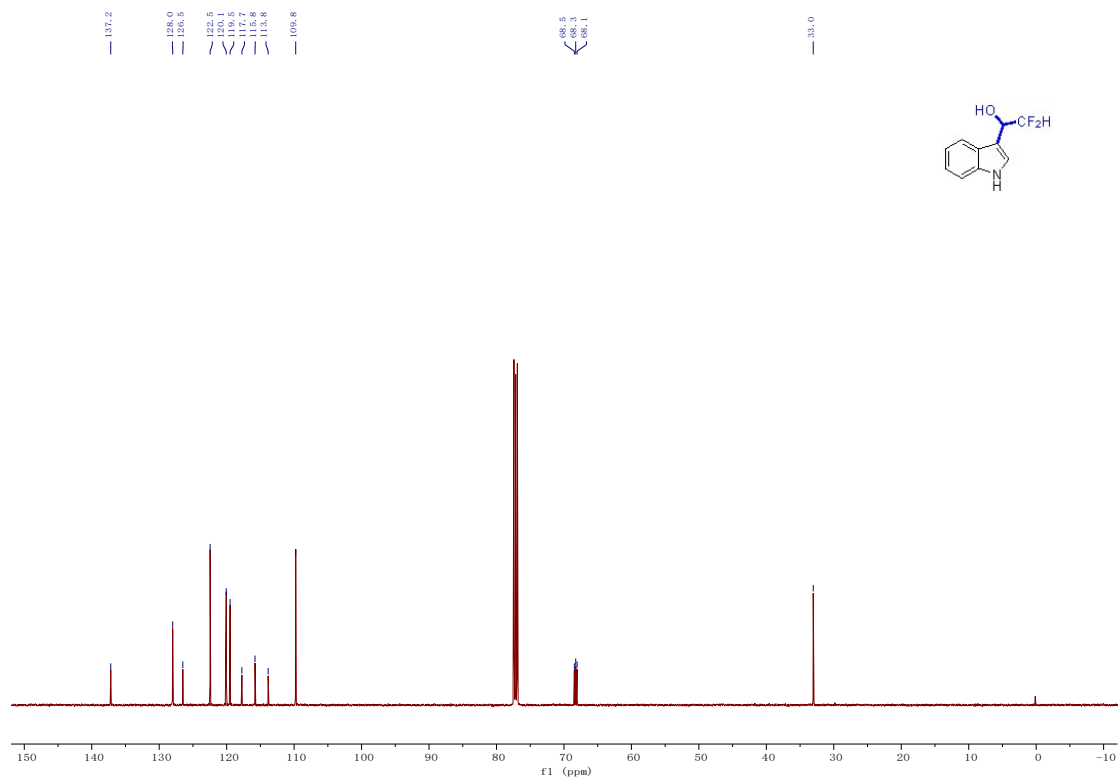

<sup>19</sup>F NMR (470 MHz, Chloroform-*d*) spectra of **3a**

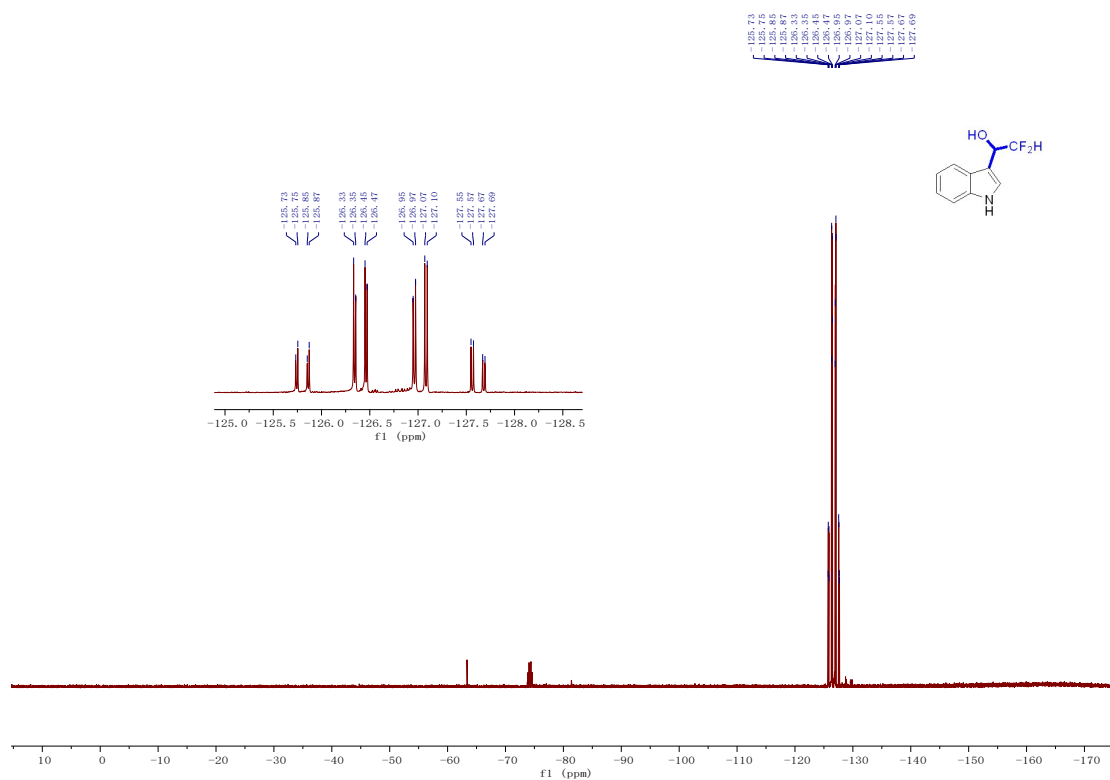

<sup>1</sup>H NMR (500 MHz, Chloroform-*d*) spectra of **3b**

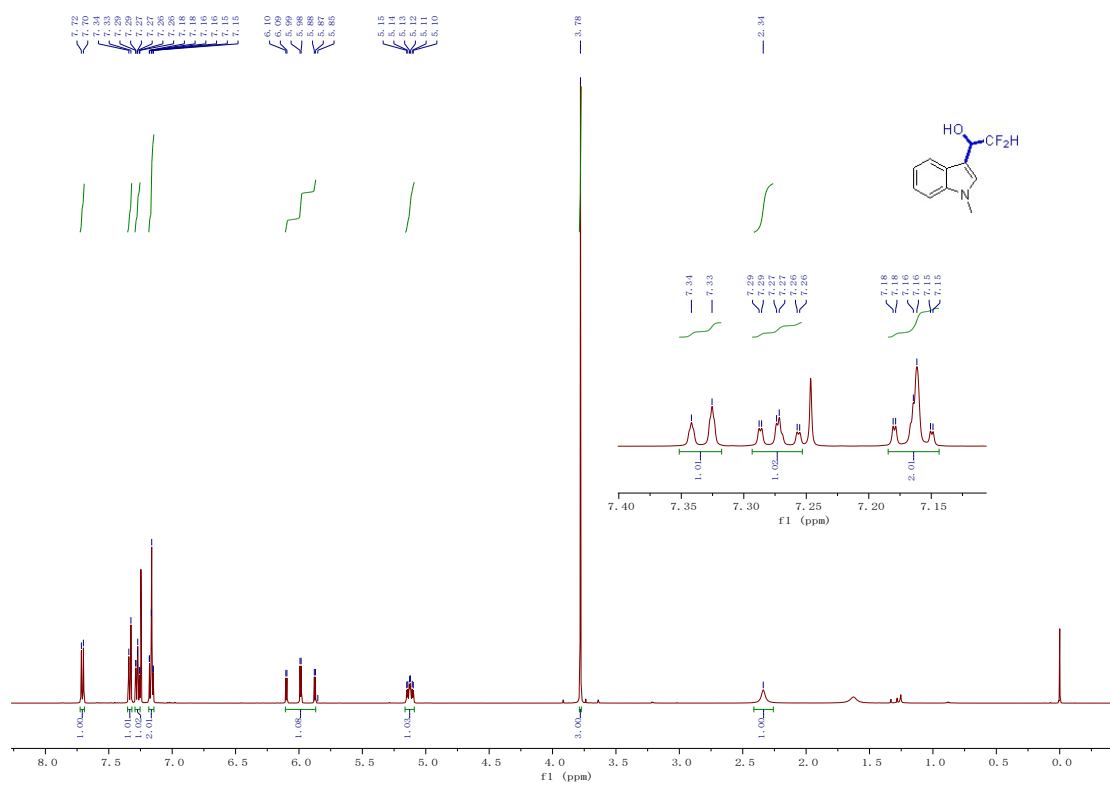

$^{13}\text{C}$  NMR (125 MHz, Chloroform-*d*) spectra of **3b**

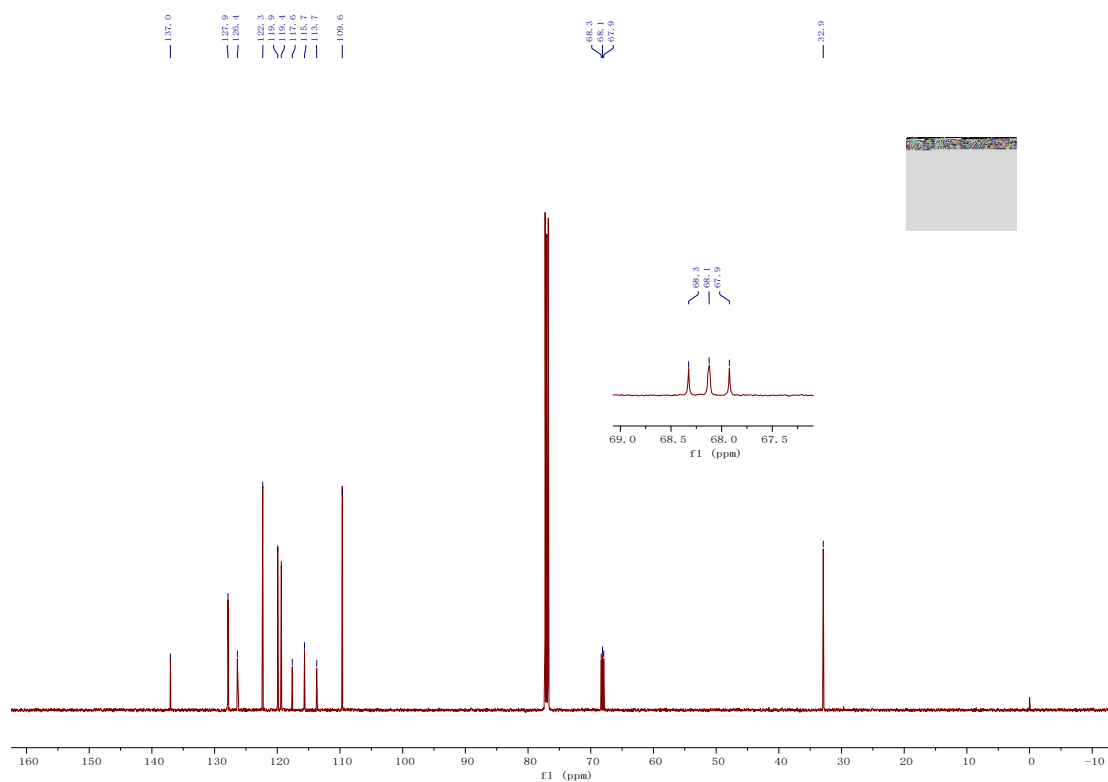

$^{19}\text{F}$  NMR (470 MHz, Chloroform-*d*) spectra of **3b**

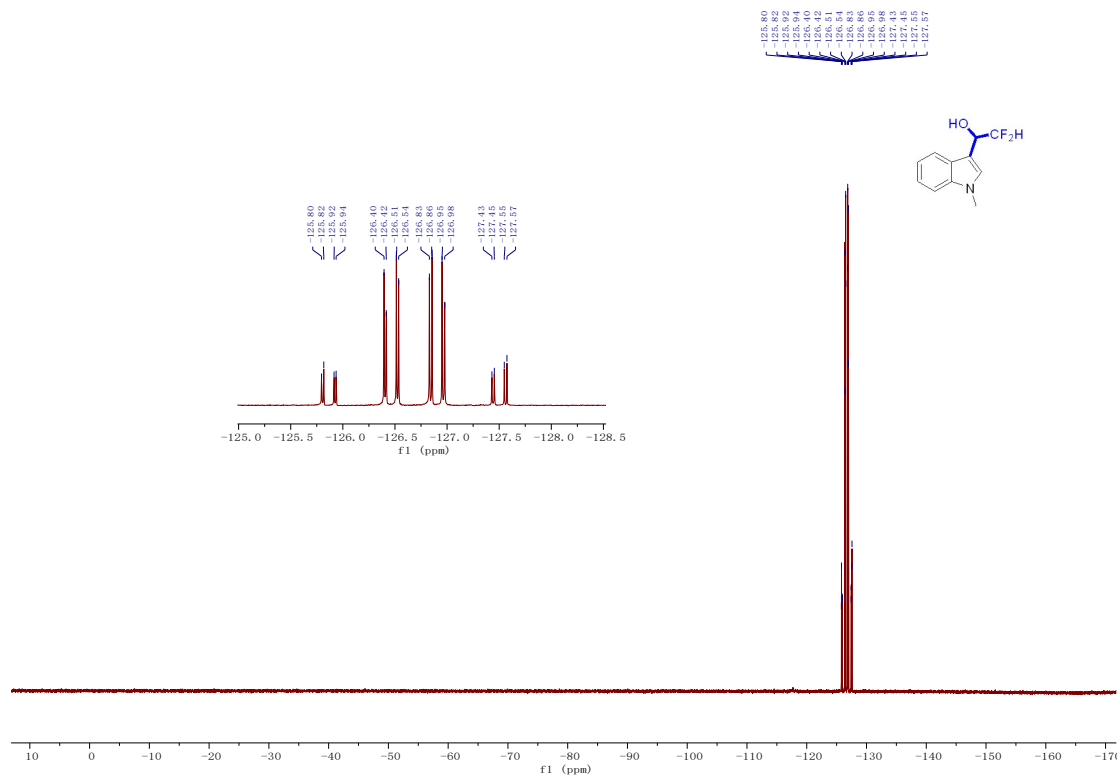

$^1\text{H}$  NMR (500 MHz, Chloroform-*d*) spectra of **3c**

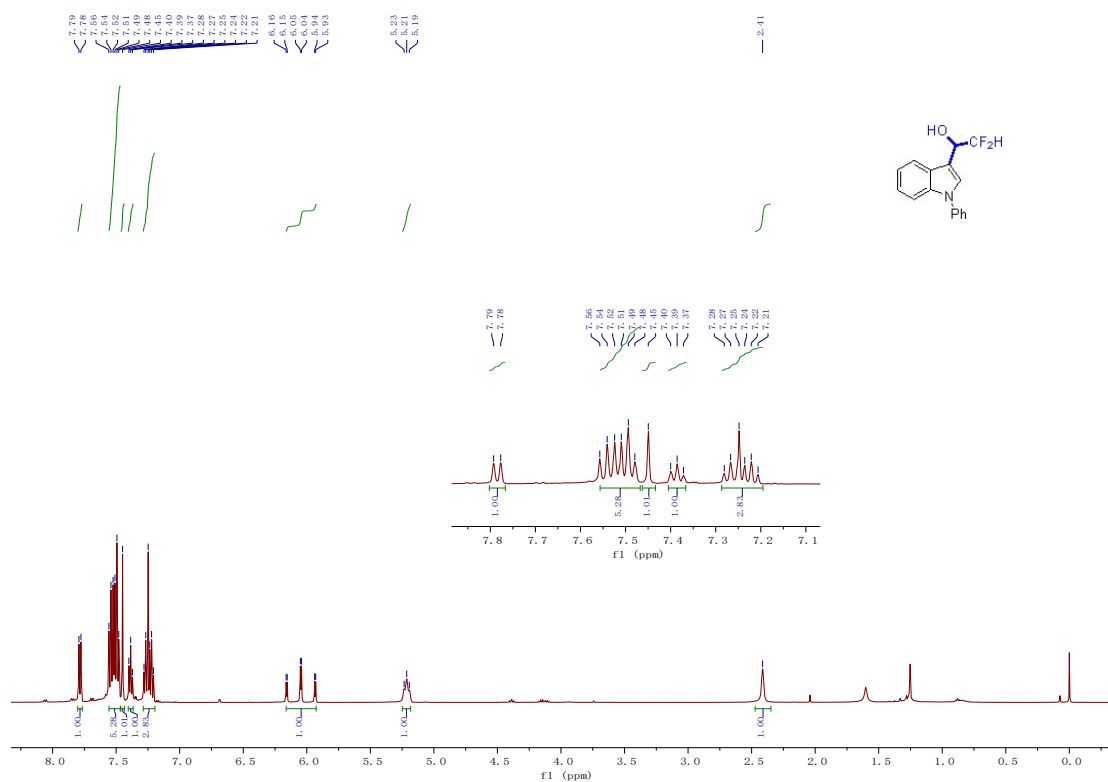

$^{13}\text{C}$  NMR (125 MHz, Chloroform-*d*) spectra of **3c**

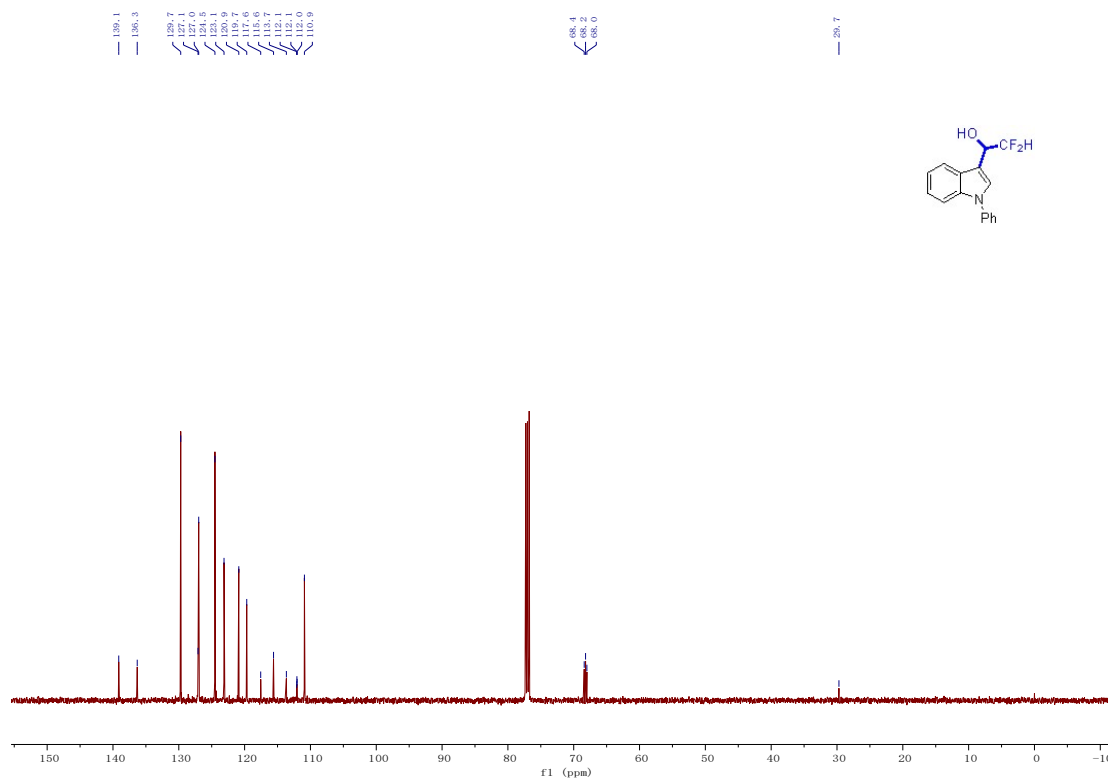

<sup>19</sup>F NMR (470 MHz, Chloroform-*d*) spectra of **3c**

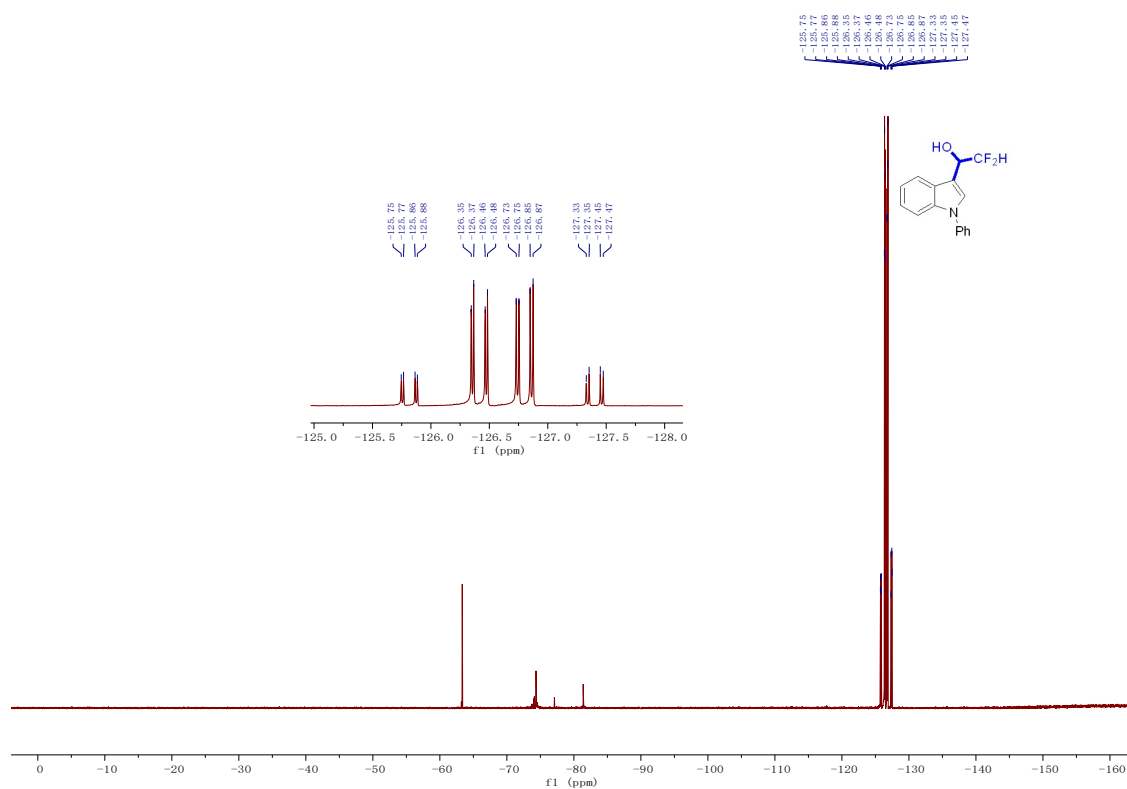

<sup>1</sup>H NMR (500 MHz, Chloroform-*d*) spectra of **3d**

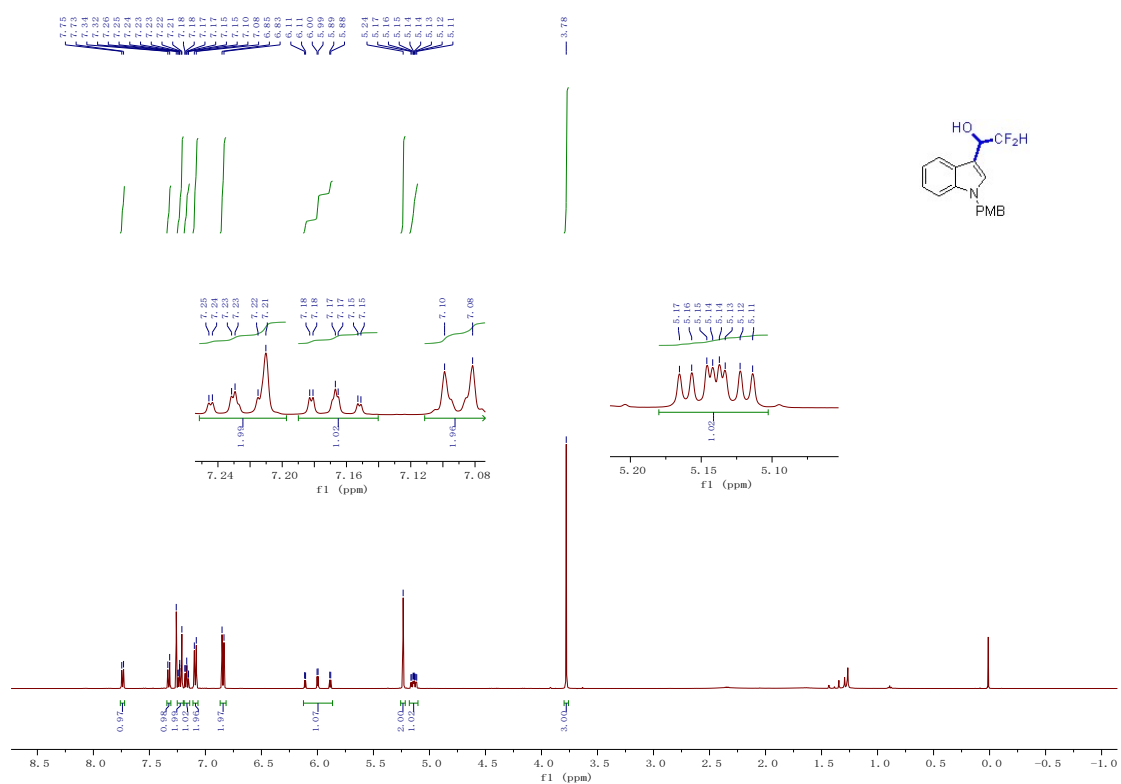

<sup>13</sup>C NMR (125 MHz, Chloroform-*d*) spectra of **3d**

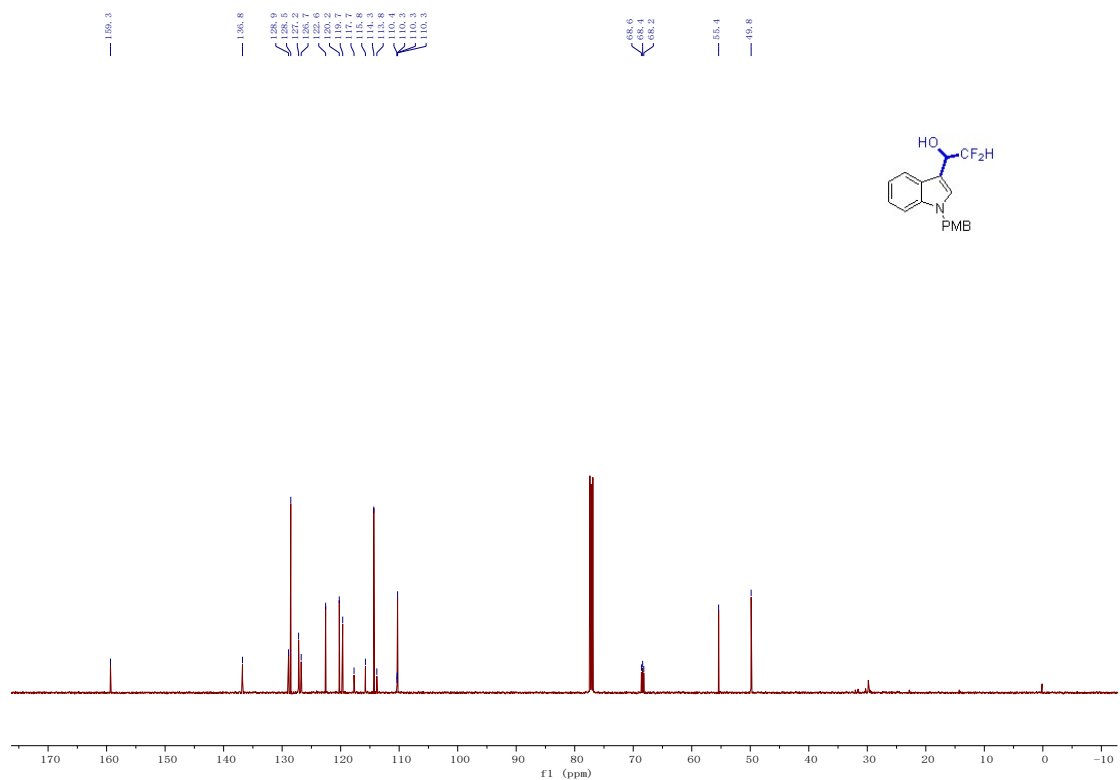

<sup>19</sup>F NMR (470 MHz, Chloroform-*d*) spectra of **3d**

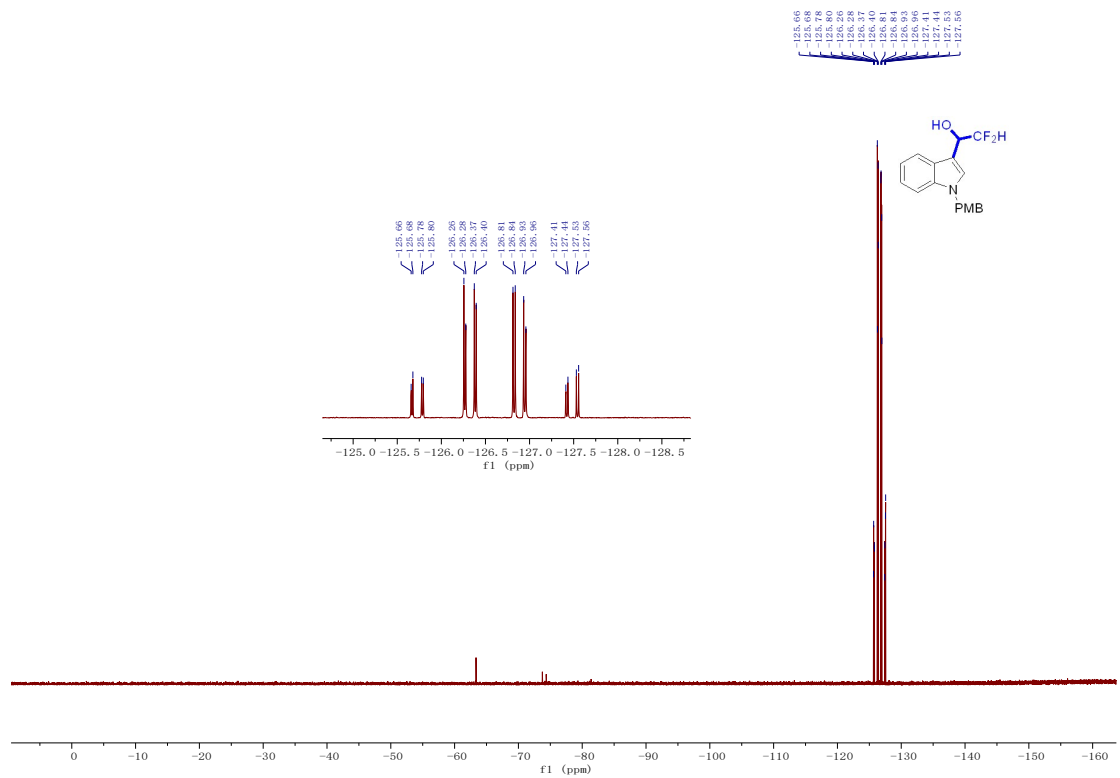

$^1\text{H}$  NMR (500 MHz, Chloroform-*d*) spectra of **3e**

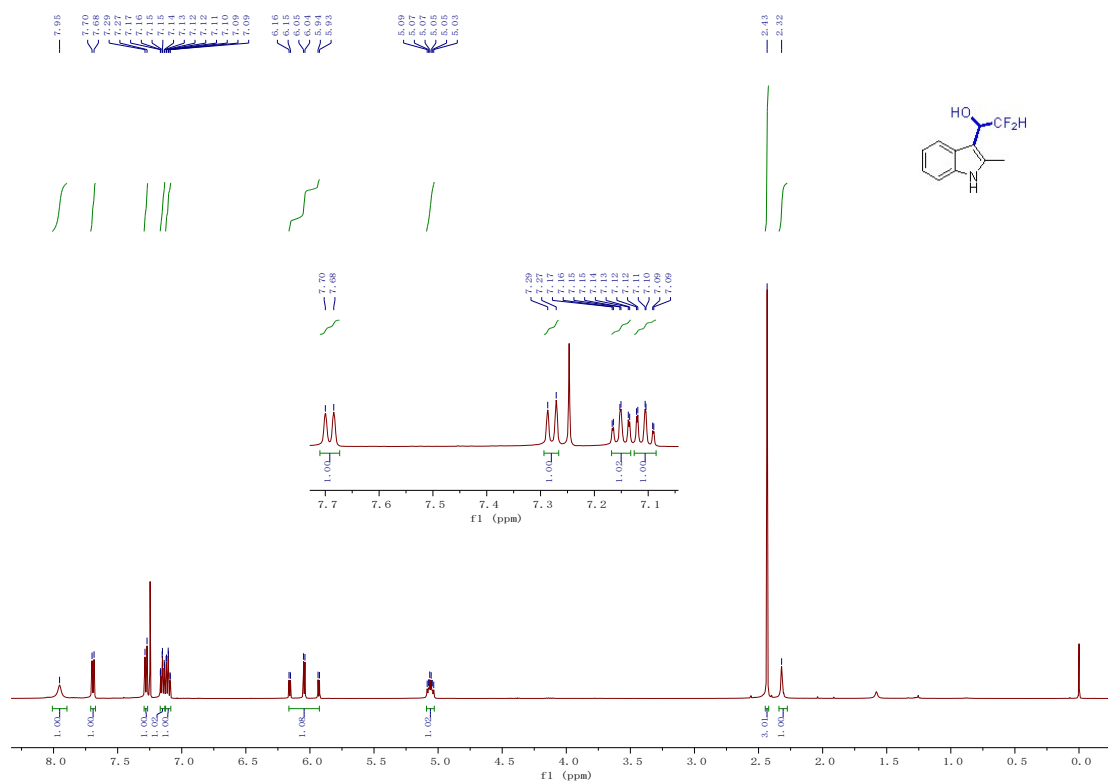

$^{13}\text{C}$  NMR (125 MHz, Chloroform-*d*) spectra of **3e**

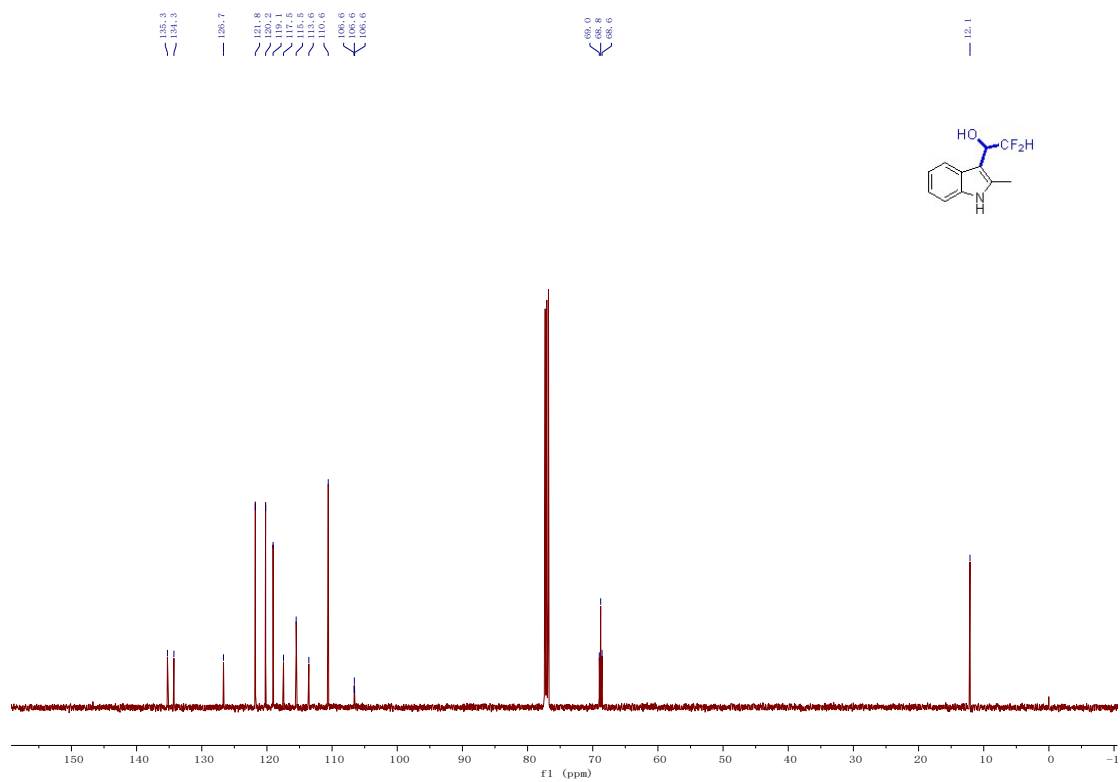



$^{19}\text{F}$  NMR (470 MHz, Chloroform-*d*) spectra of **3e**

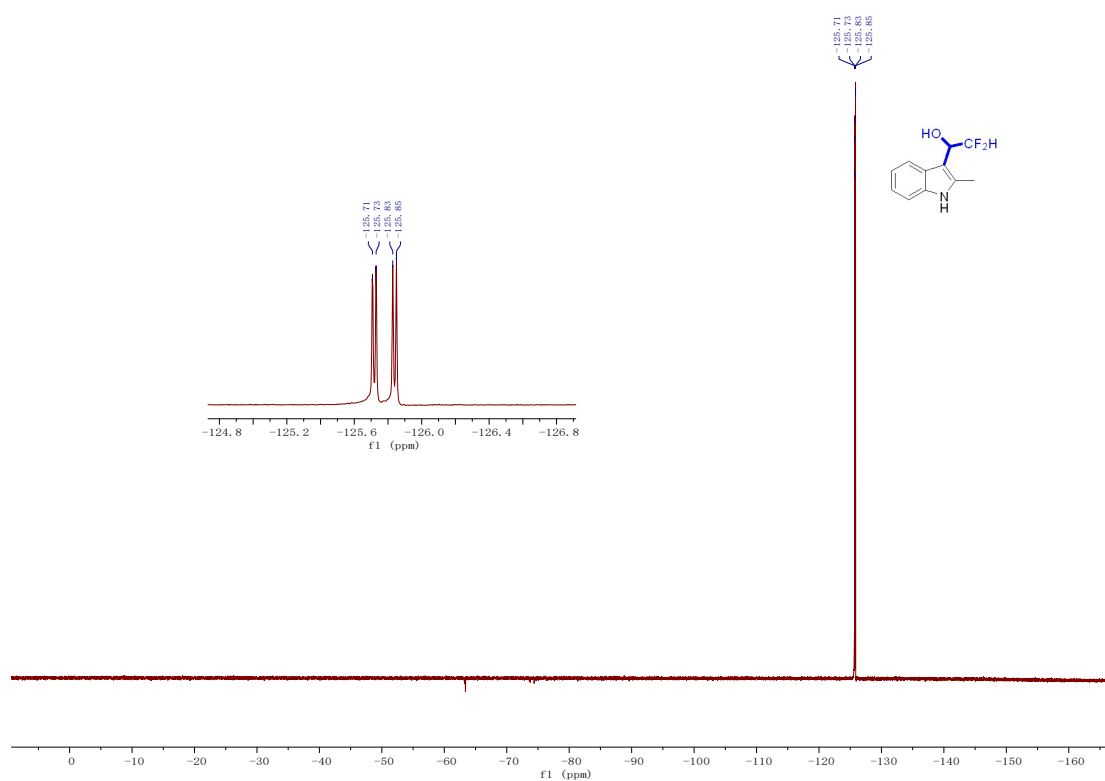

$^1\text{H}$  NMR (500 MHz, Chloroform-*d*) spectra of **3f**

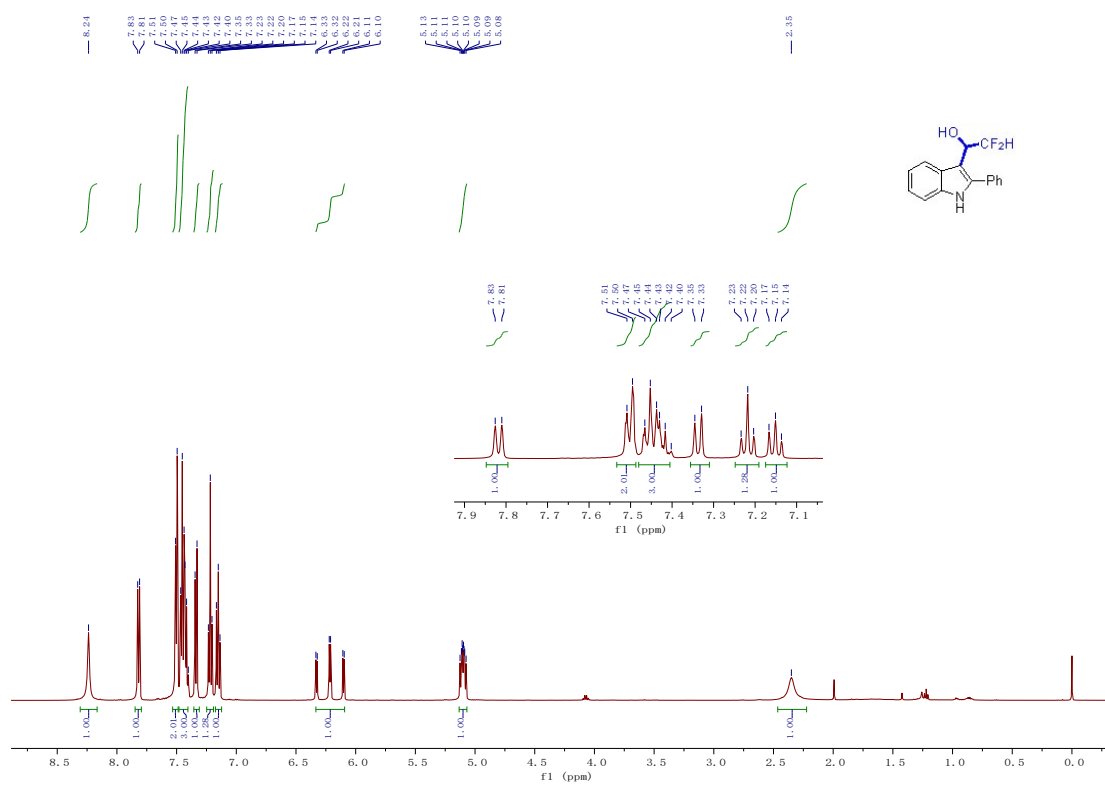

$^{13}\text{C}$  NMR (125 MHz, Chloroform-*d*) spectra of **3f**

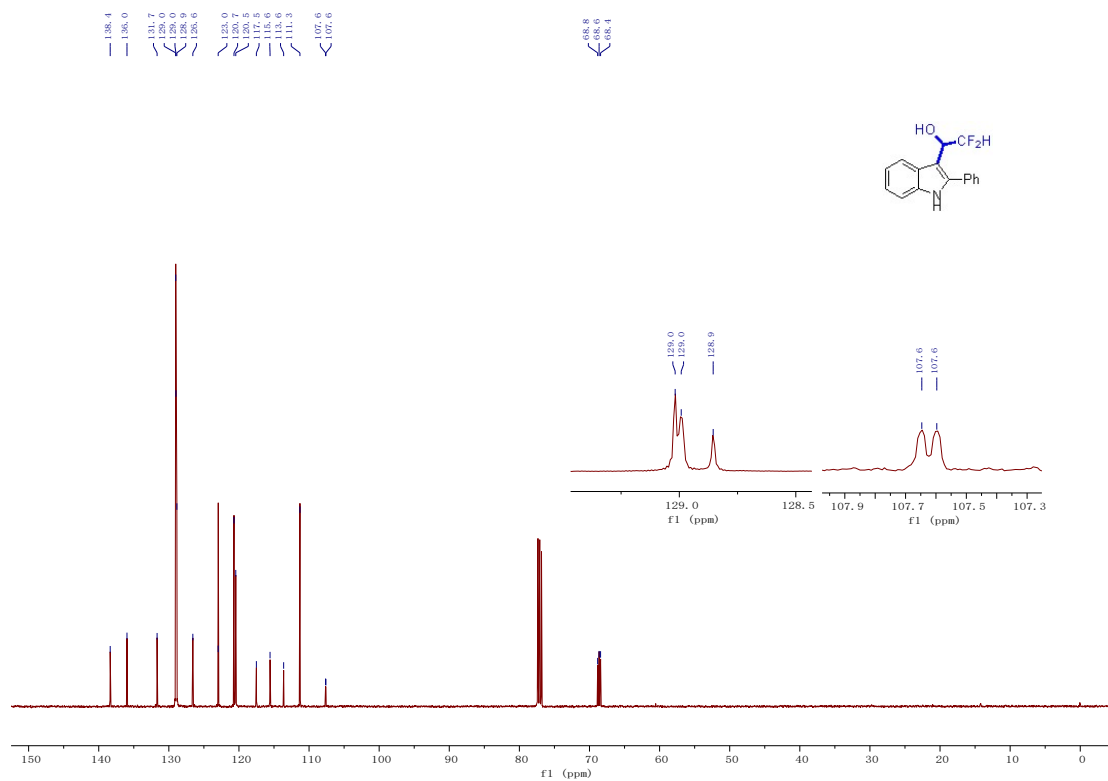

$^{19}\text{F}$  NMR (470 MHz, Chloroform-*d*) spectra of **3f**

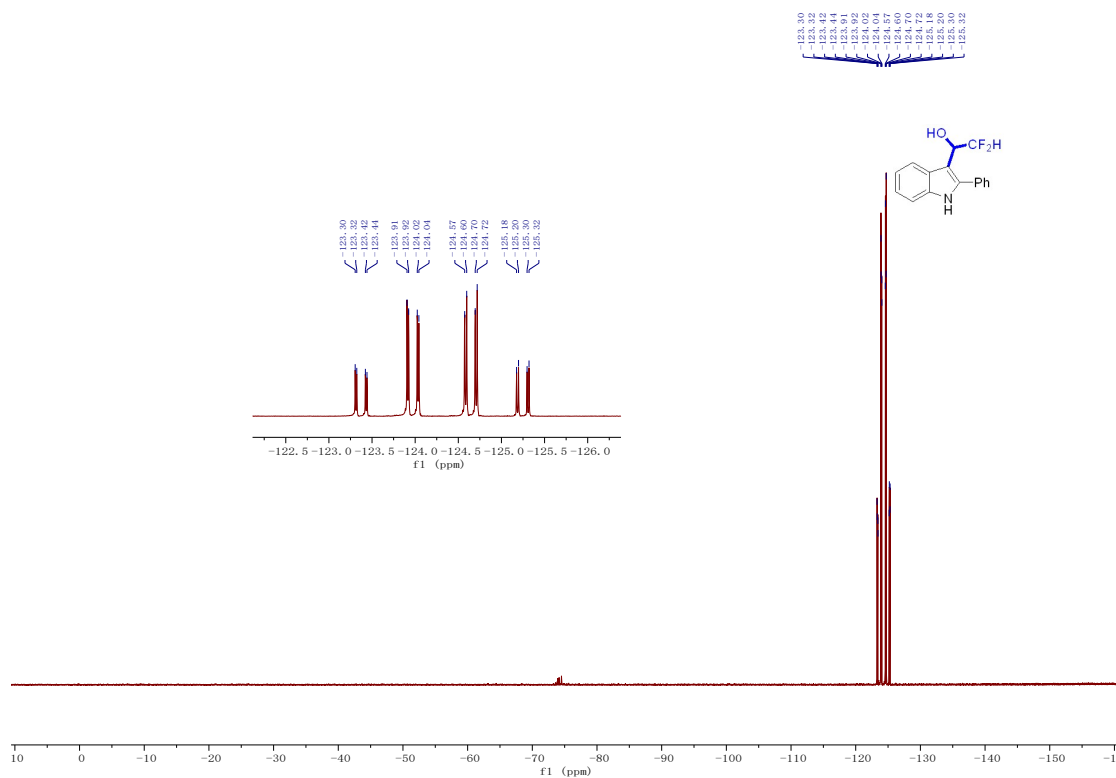

<sup>1</sup>H NMR (500 MHz, Chloroform-*d*) spectra of **3g**

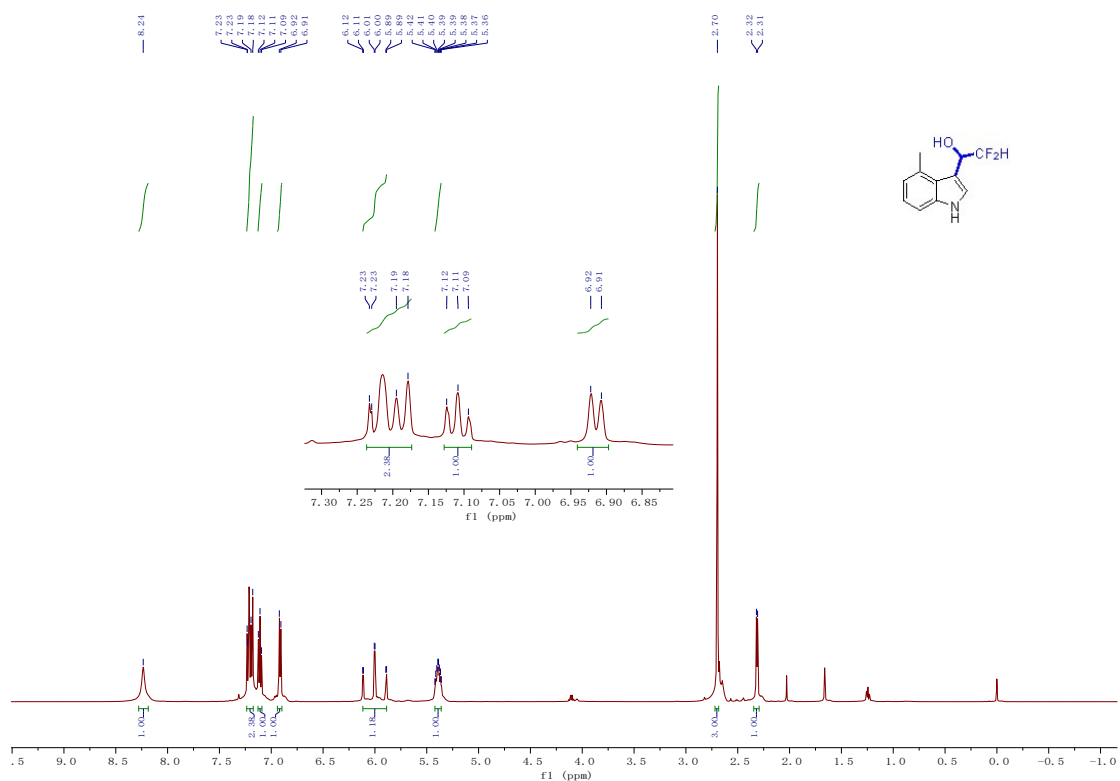

<sup>13</sup>C NMR (125 MHz, Chloroform-*d*) spectra of **3g**

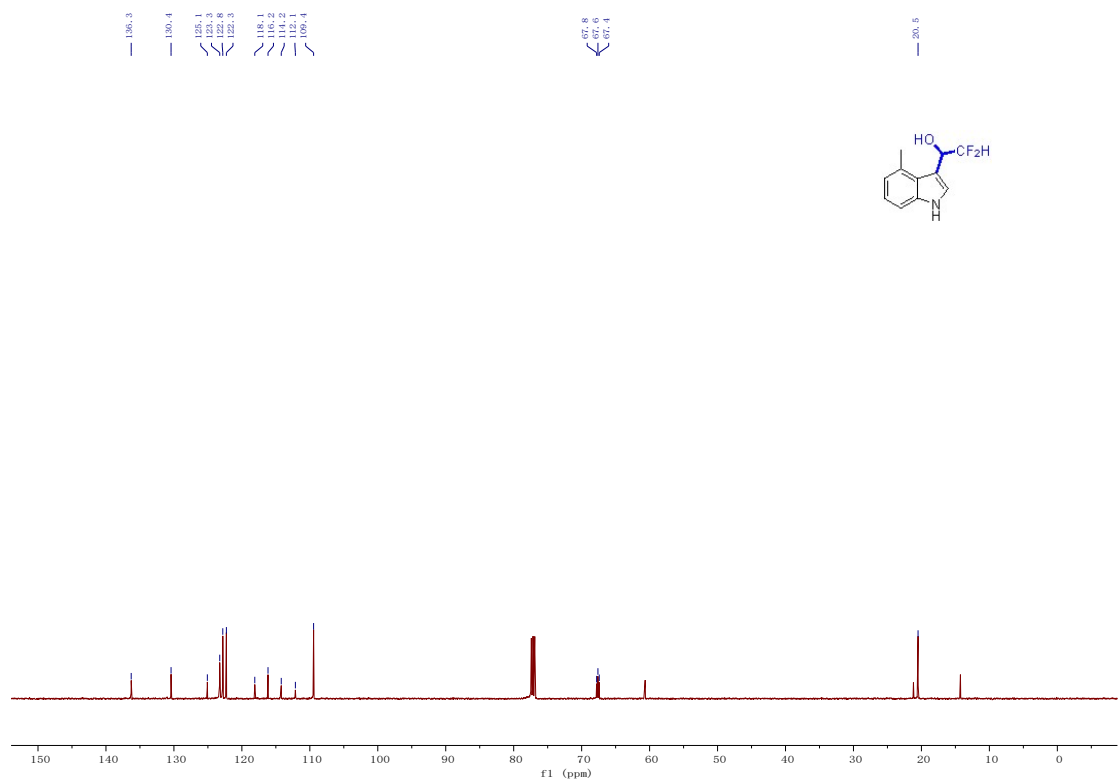

<sup>19</sup>F NMR (470 MHz, Chloroform-*d*) spectra of **3g**

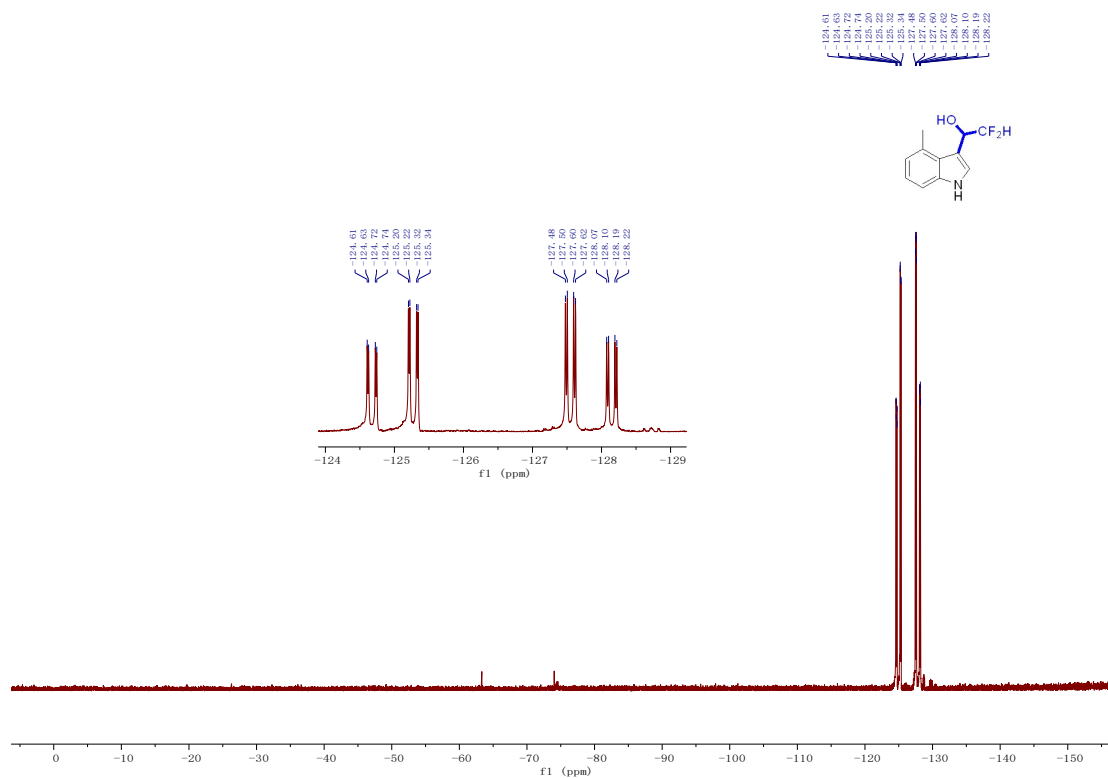

<sup>1</sup>H NMR (500 MHz, Chloroform-*d*) spectra of **3h**

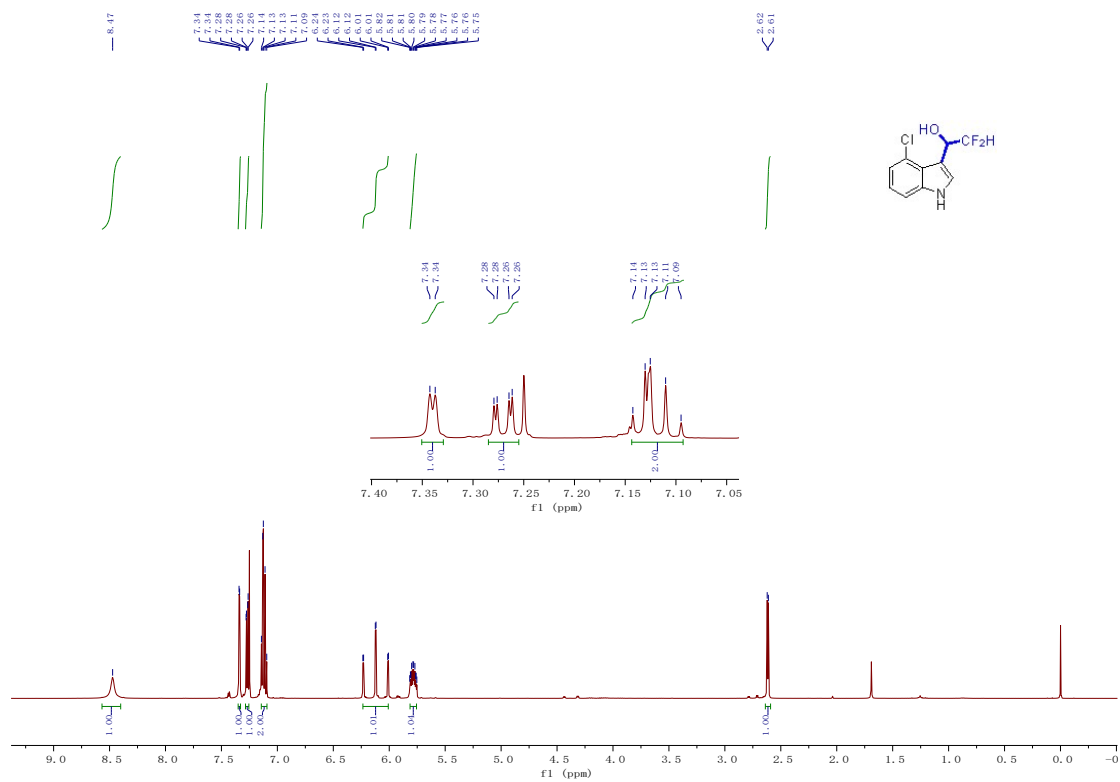

<sup>13</sup>C NMR (125 MHz, Chloroform-*d*) spectra of **3h**

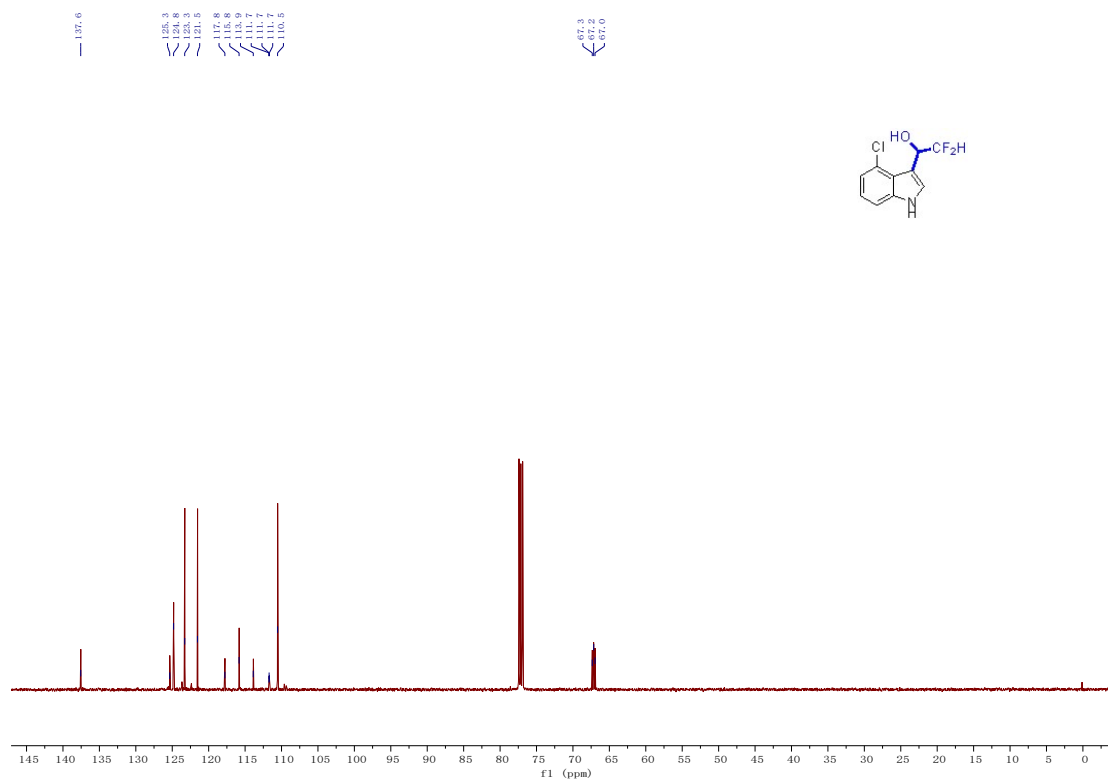

<sup>19</sup>F NMR (470 MHz, Chloroform-*d*) spectra of **3h**

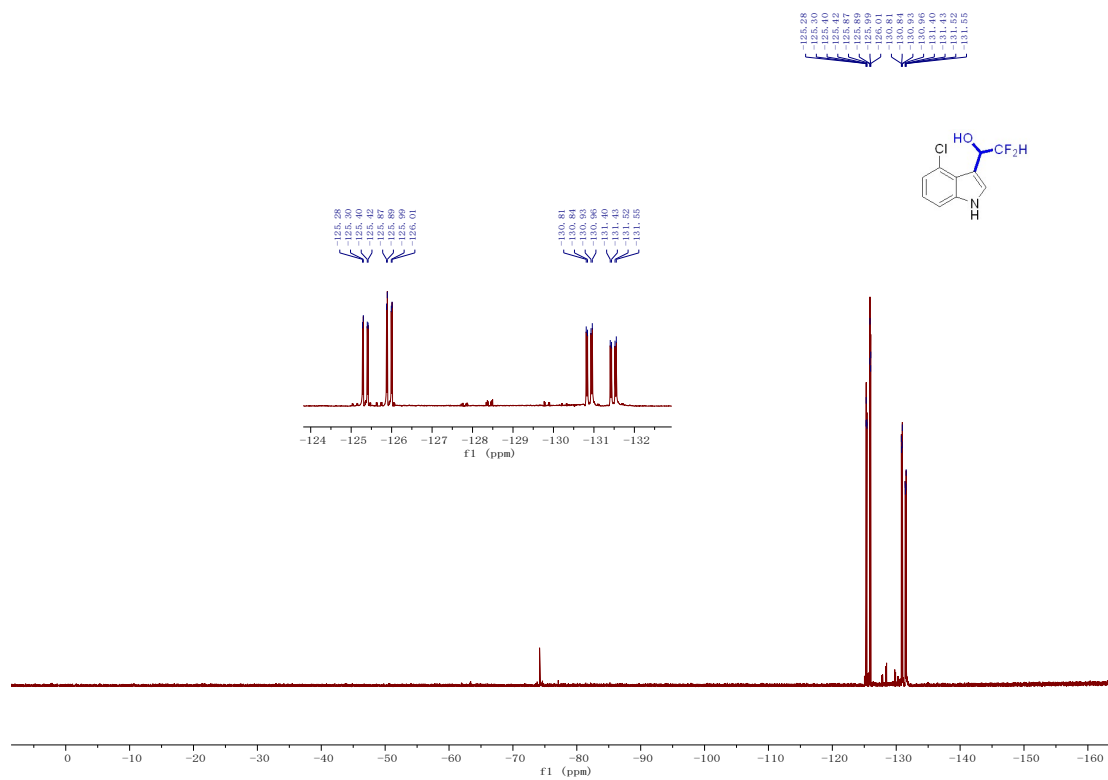

<sup>1</sup>H NMR (500 MHz, DMSO-*d*<sub>6</sub>) spectra of **3i**

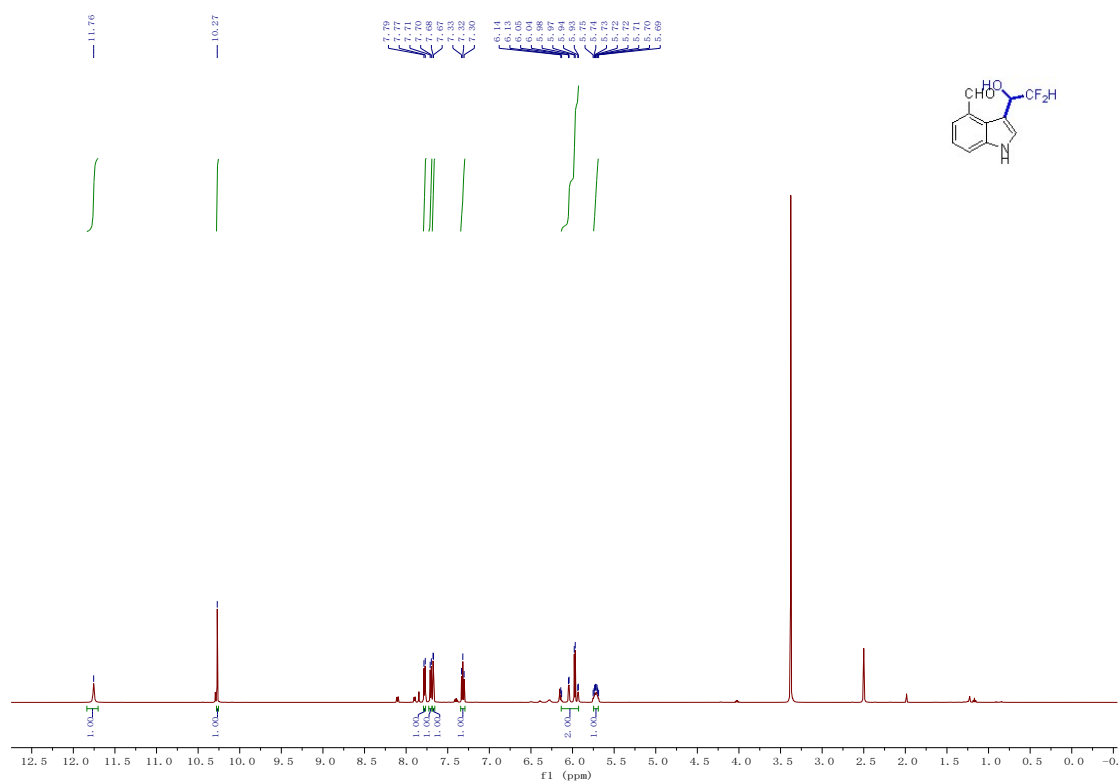

<sup>13</sup>C NMR (125 MHz, DMSO-*d*<sub>6</sub>) spectra of **3i**

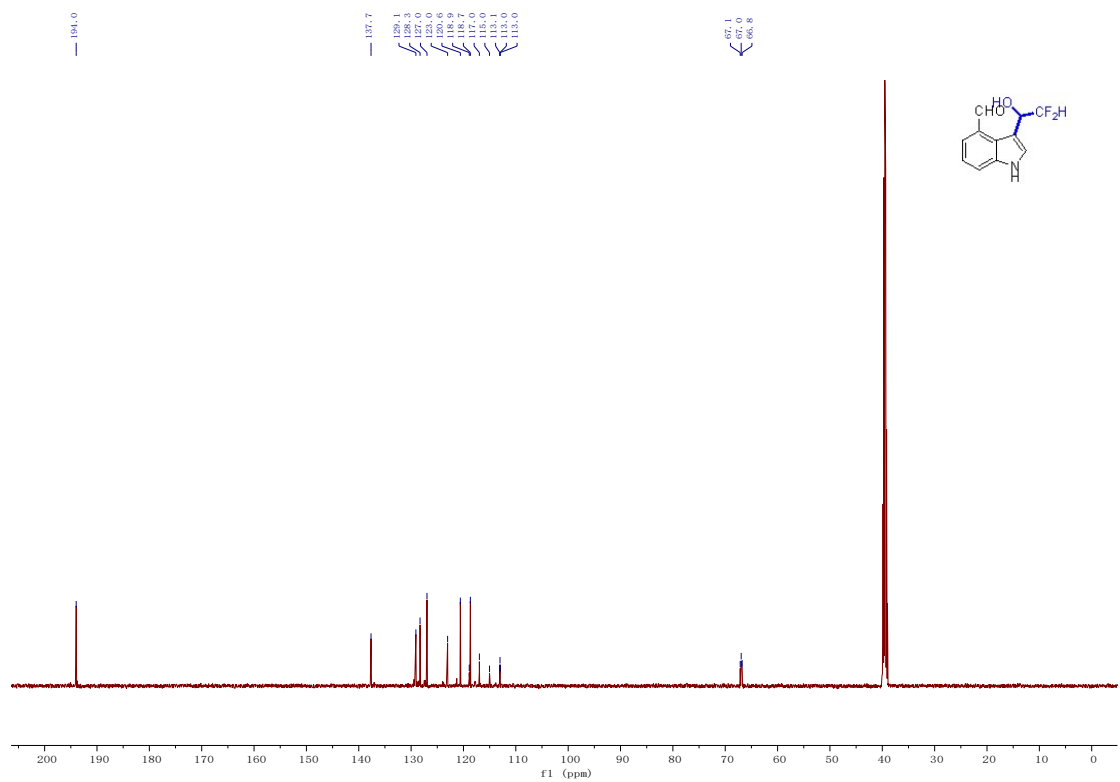

$^{19}\text{F}$  NMR (470 MHz,  $\text{DMSO-}d_6$ ) spectra of **3i**

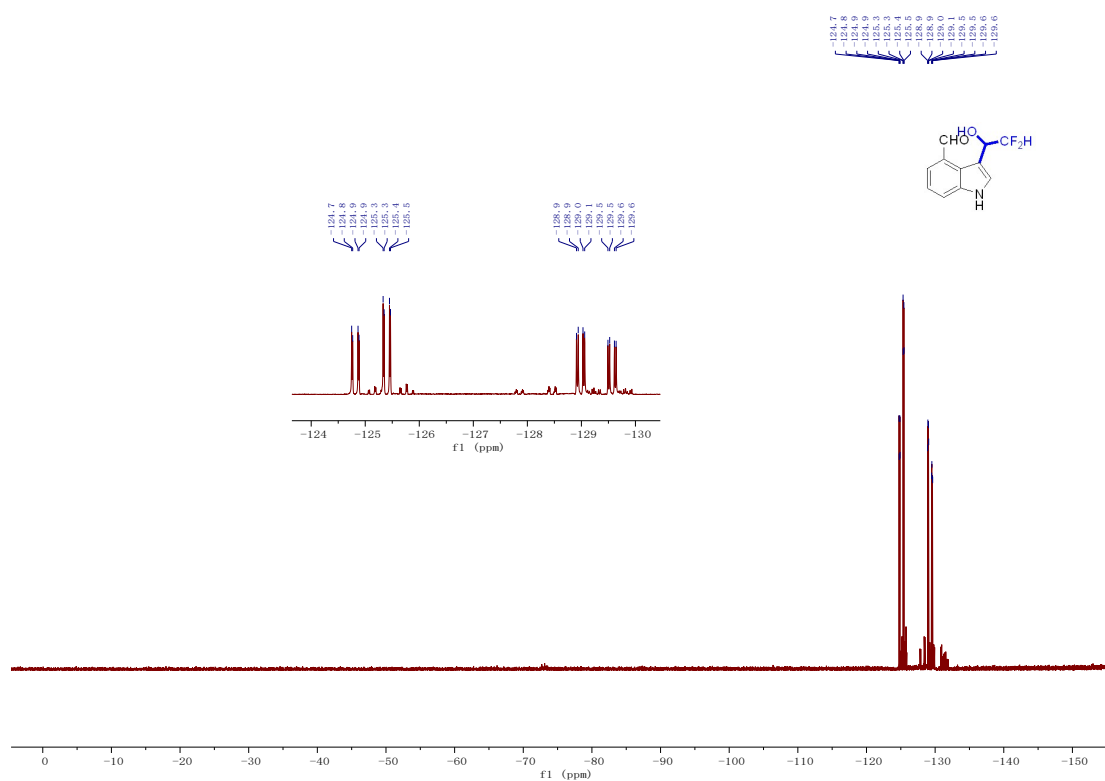

$^1\text{H}$  NMR (500 MHz,  $\text{Methanol-}d_4$ ) spectra of **3j**

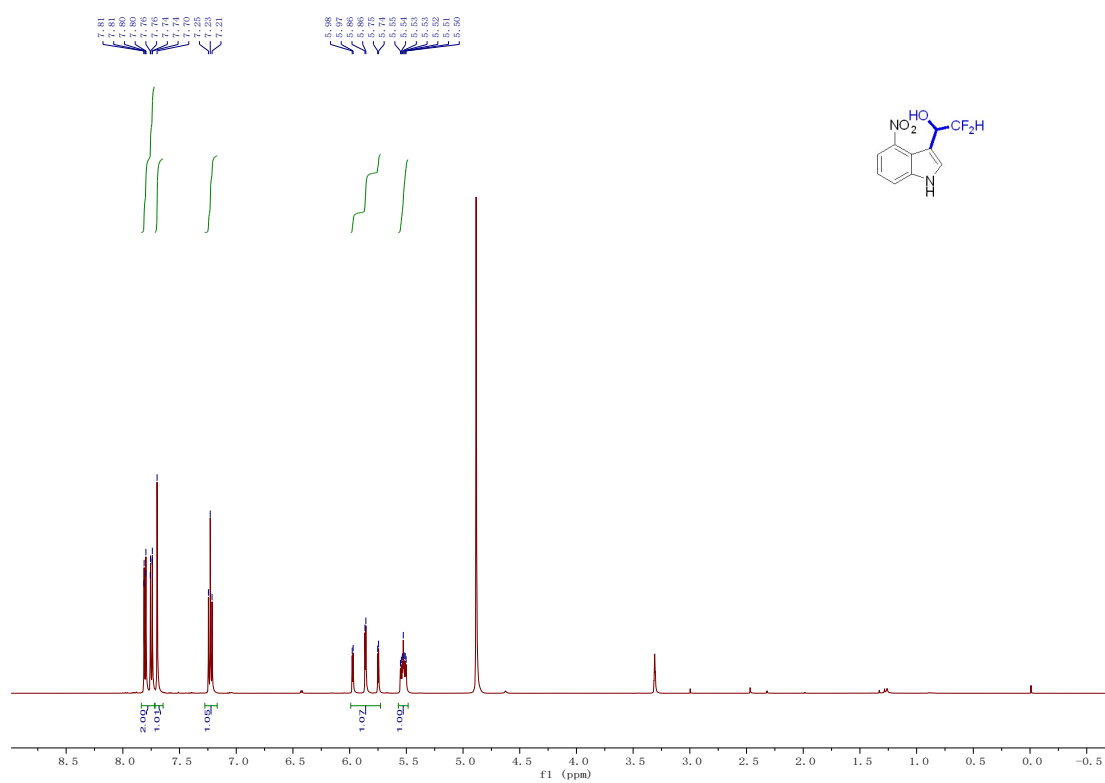

<sup>13</sup>C NMR (125 MHz, Methanol-*d*<sub>4</sub>) spectra of **3j**

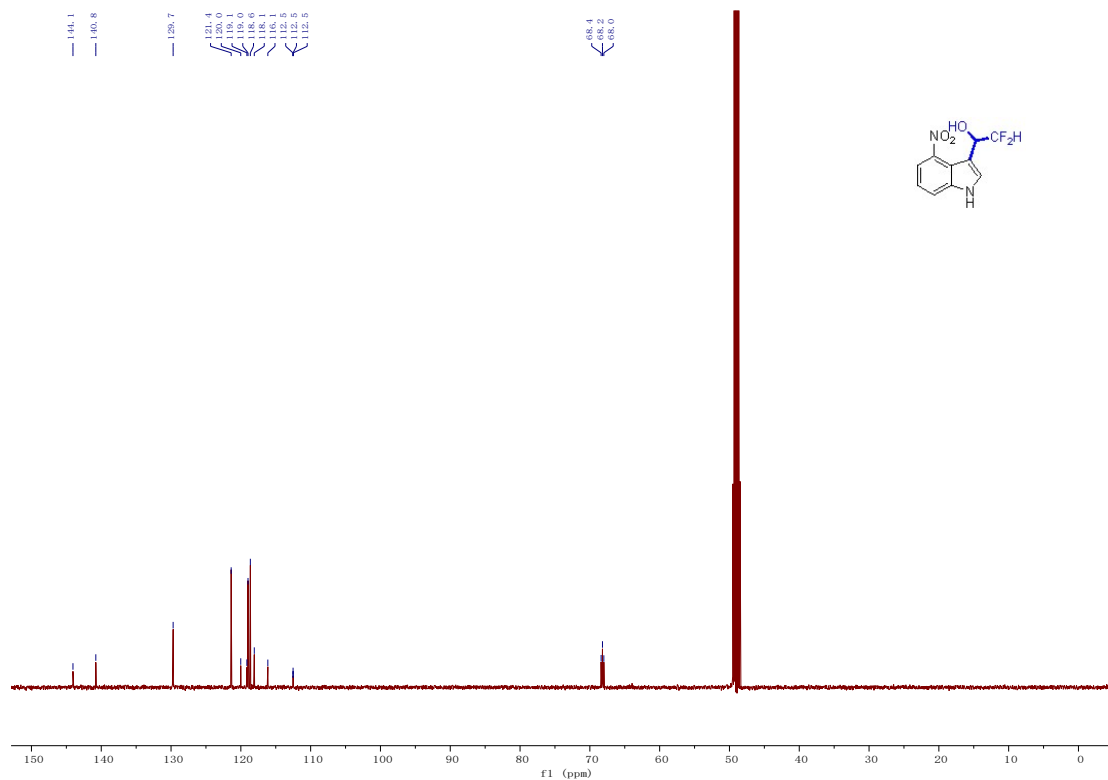

<sup>19</sup>F NMR (470 MHz, Methanol-*d*<sub>4</sub>) spectra of **3j**

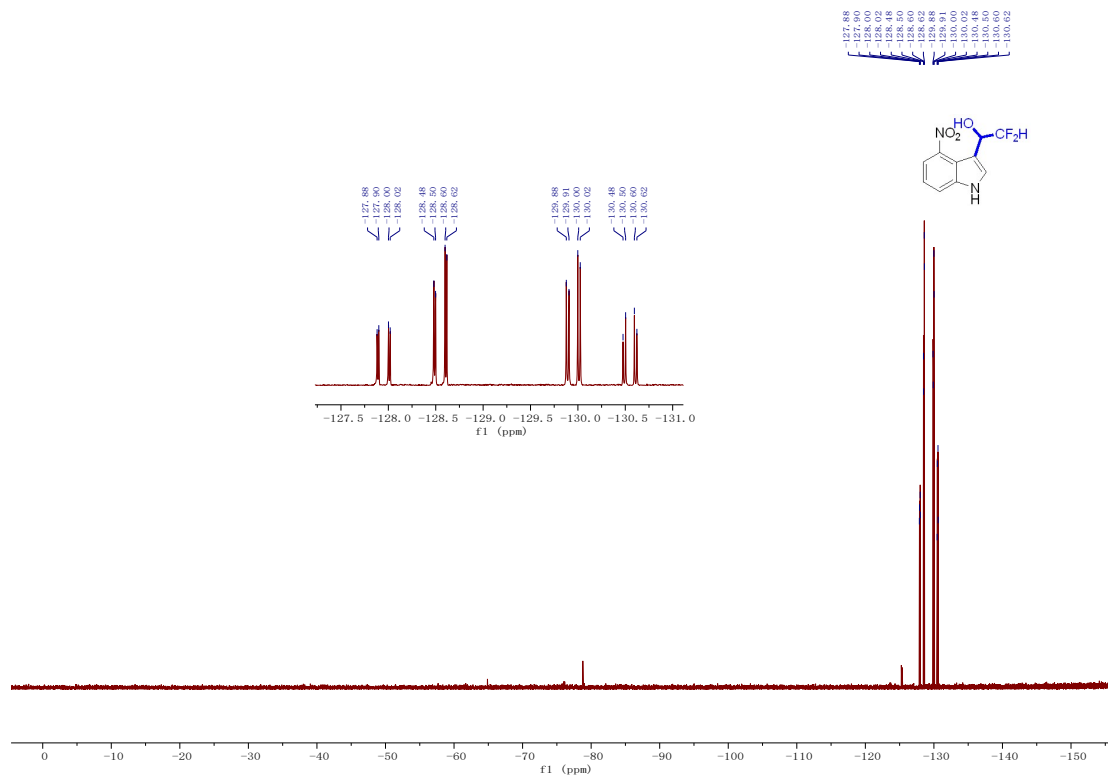



<sup>1</sup>H NMR (500 MHz, Chloroform-*d*) spectra of **3k**

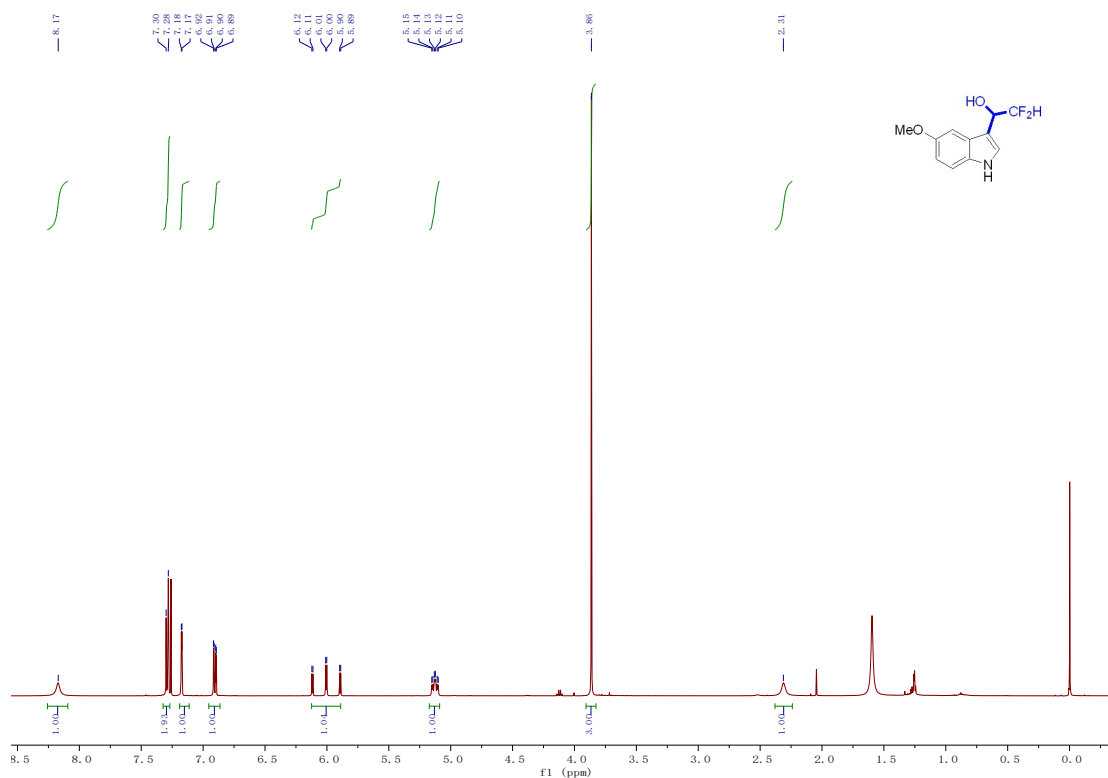

<sup>13</sup>C NMR (125 MHz, Chloroform-*d*) spectra of **3k**

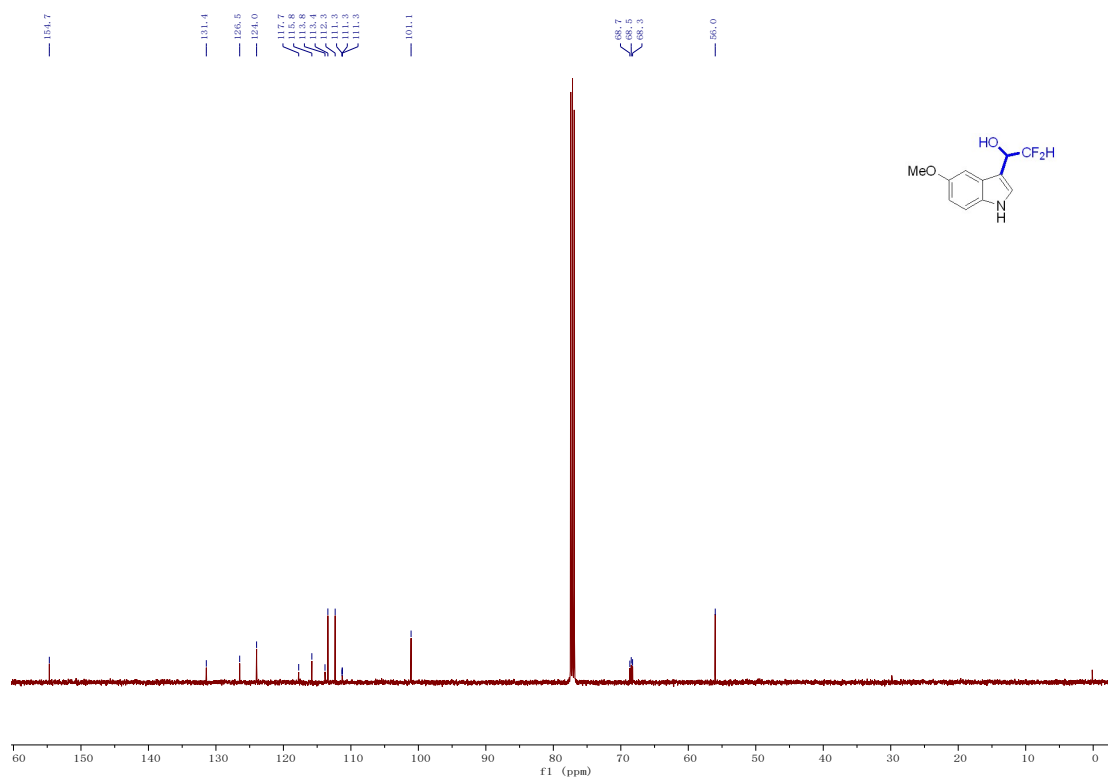

$^{19}\text{F}$  NMR (470 MHz, Chloroform-*d*) spectra of **3k**

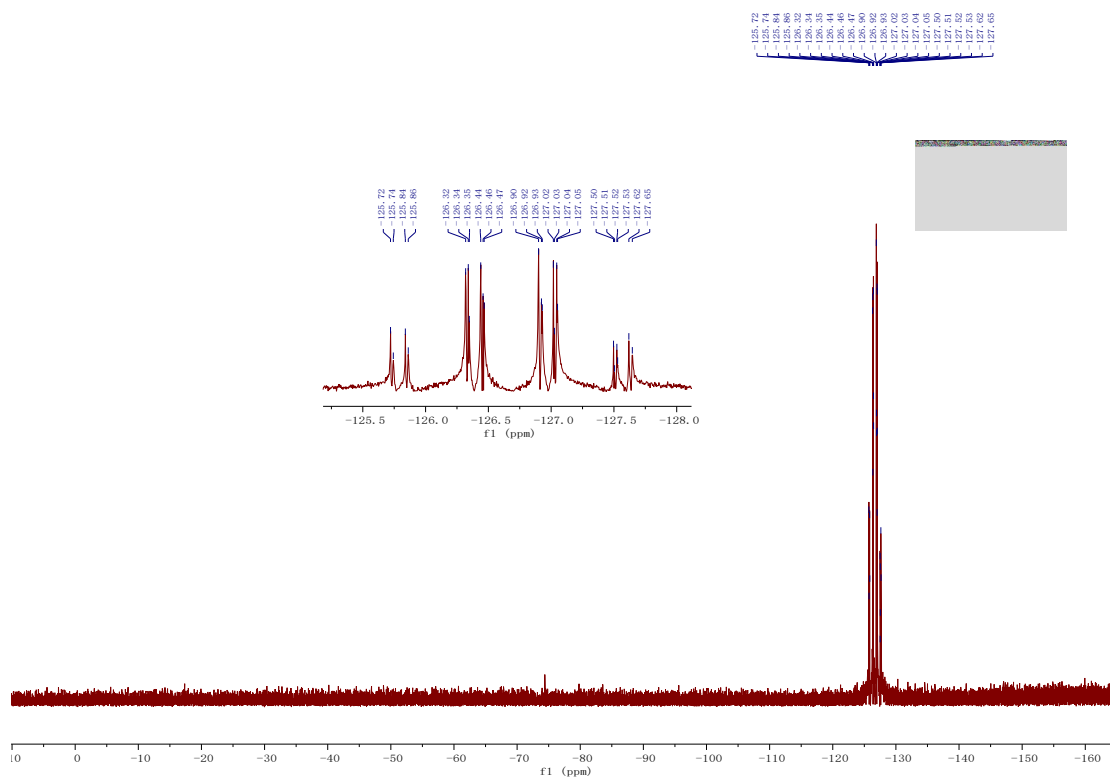

$^1\text{H}$  NMR (500 MHz, DMSO-*d*<sub>6</sub>) spectra of **3l**

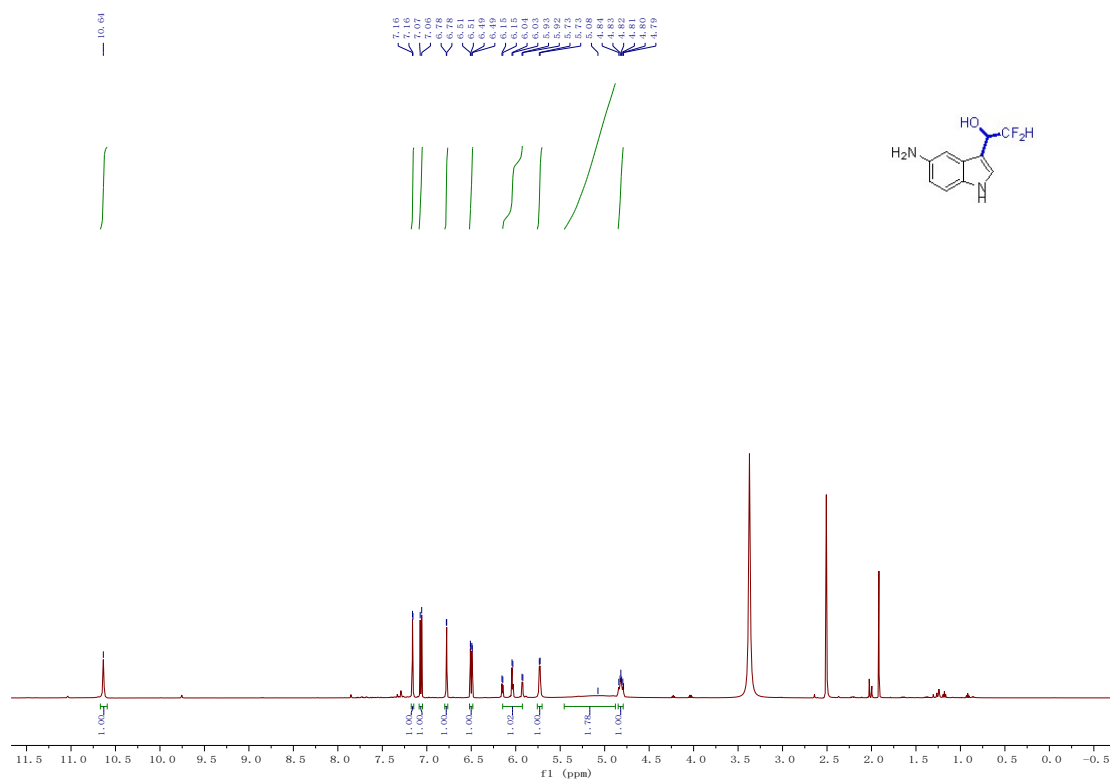

$^{13}\text{C}$  NMR (125 MHz,  $\text{DMSO-}d_6$ ) spectra of **31**

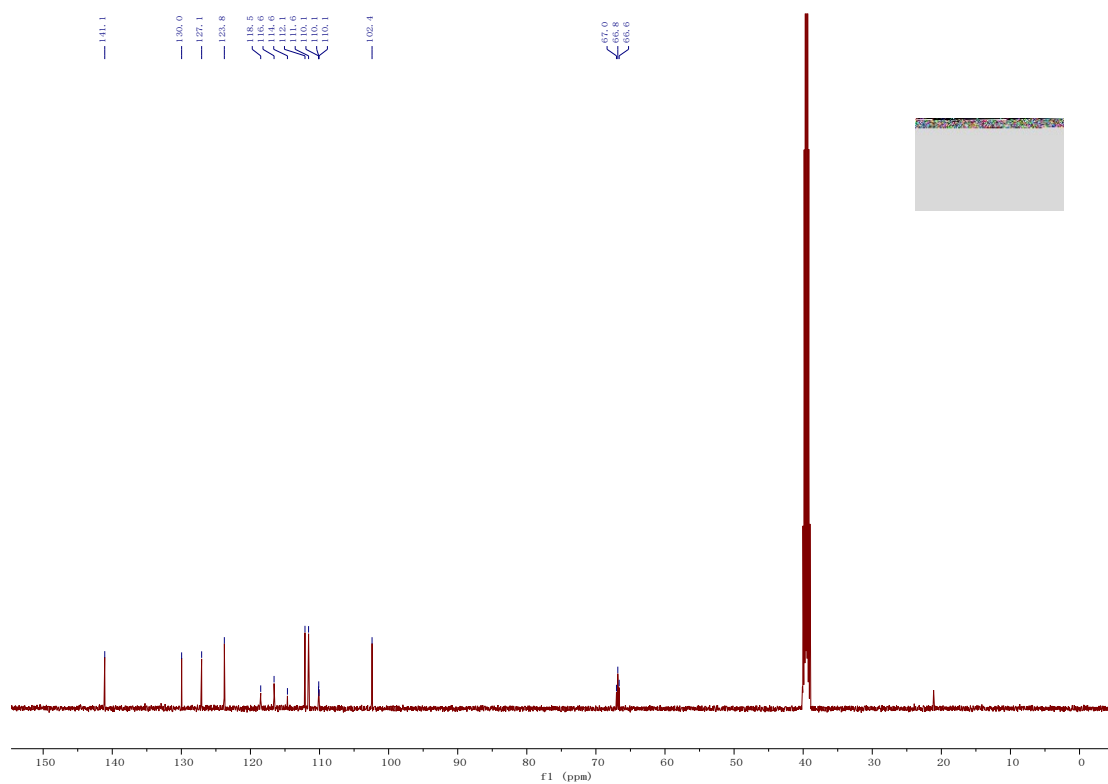

$^{19}\text{F}$  NMR (470 MHz,  $\text{DMSO-}d_6$ ) spectra of **31**

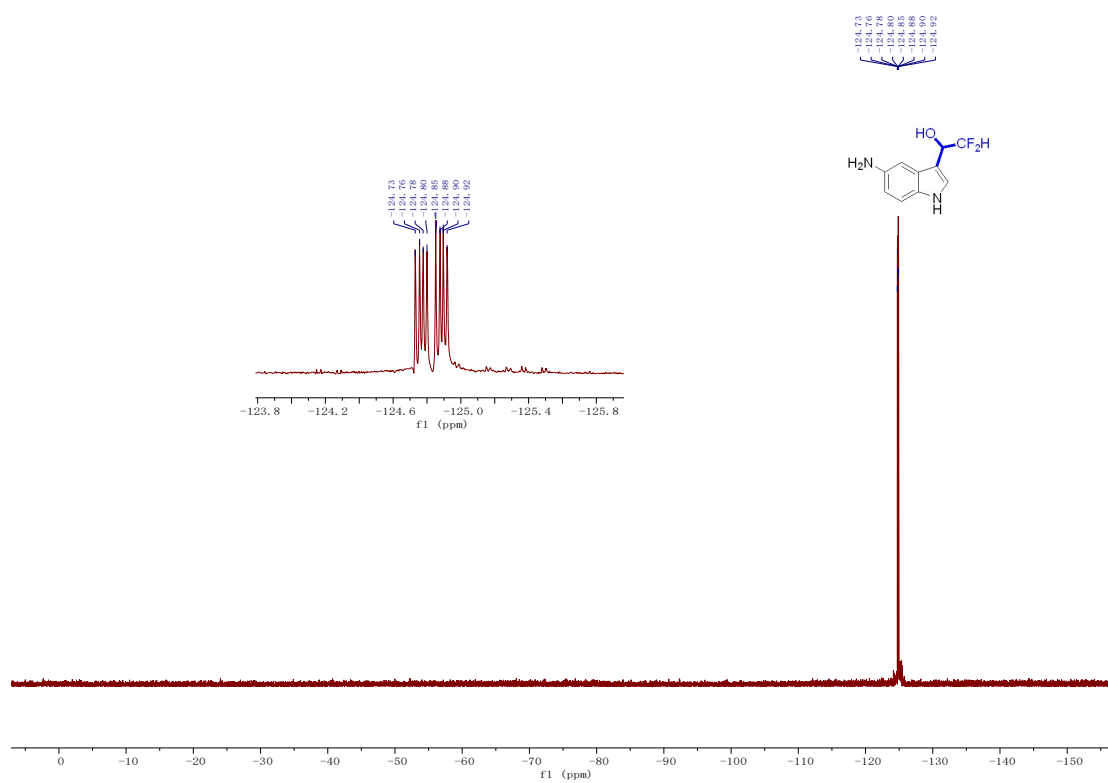

### $^1\text{H}$ NMR (500 MHz, Chloroform-*d*) spectra of **3m**

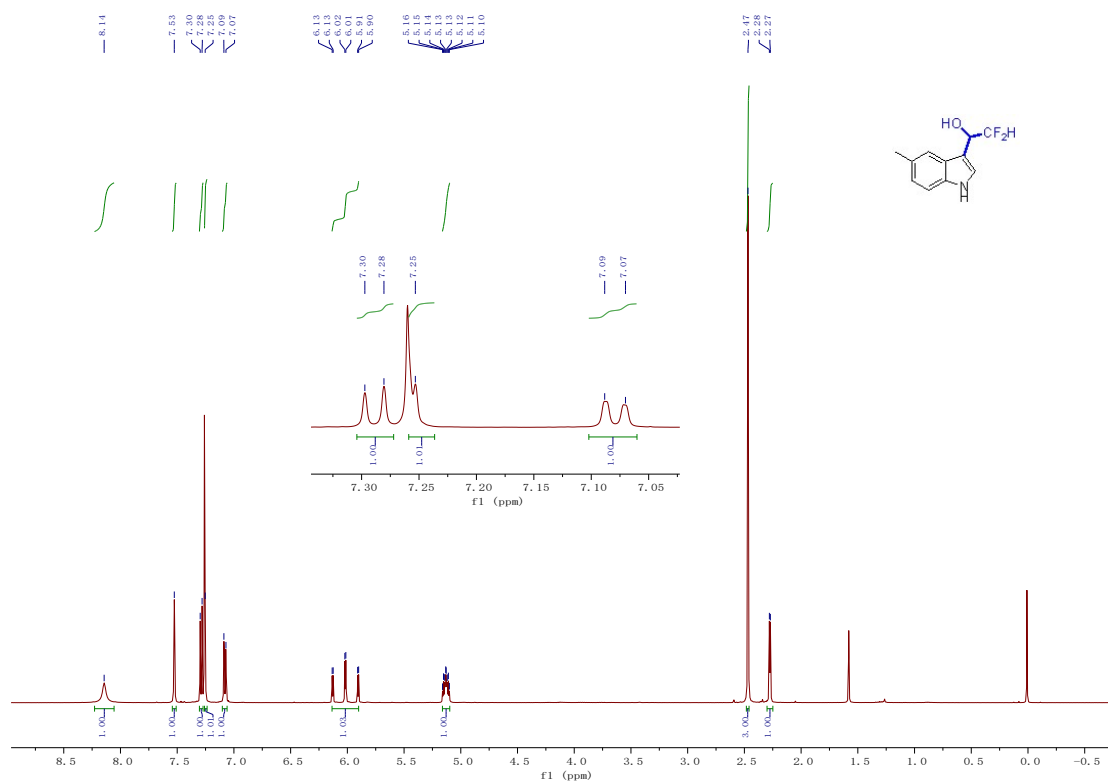

### $^{13}\text{C}$ NMR (125 MHz, Chloroform-*d*) spectra of **3m**

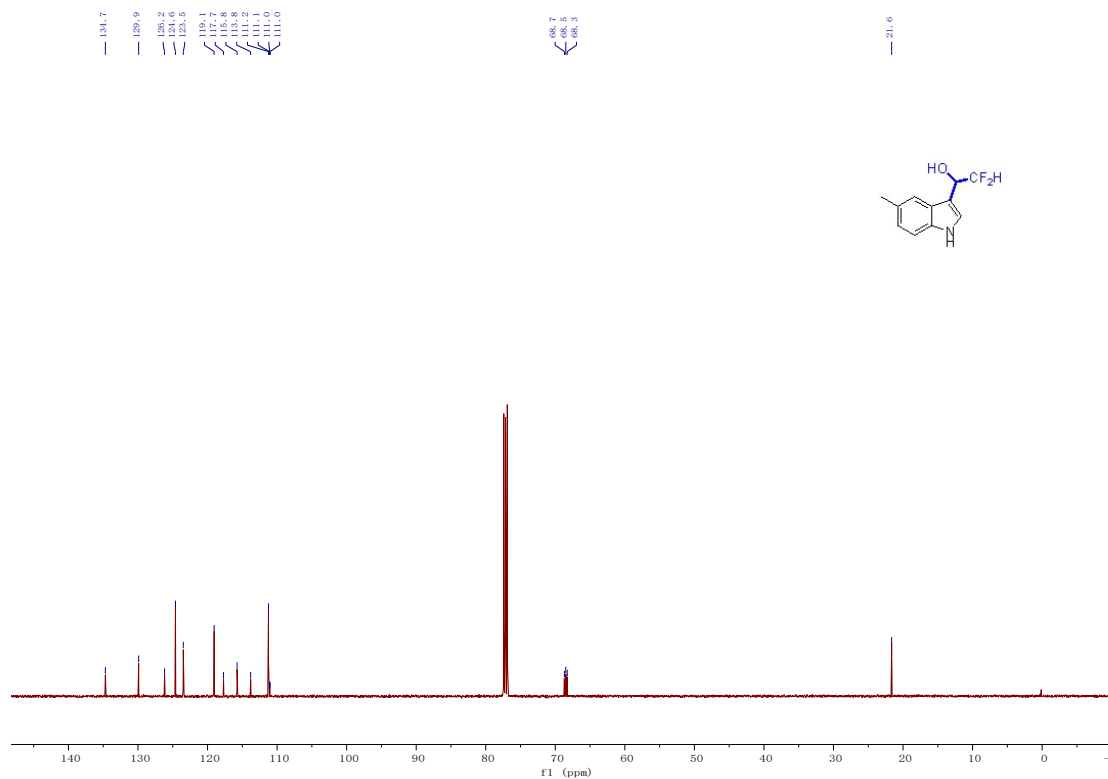

$^{19}\text{F}$  NMR (470 MHz, Chloroform-*d*) spectra of **3m**

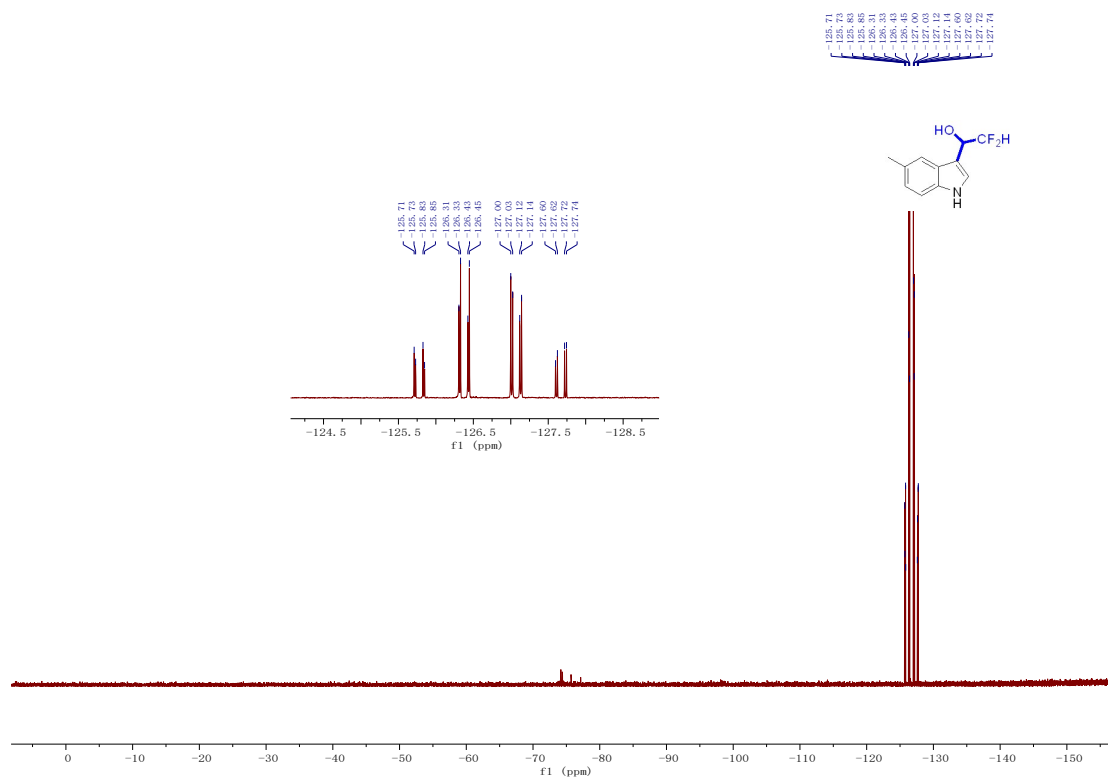

$^1\text{H}$  NMR (500 MHz, Chloroform-*d*) spectra of **3n**

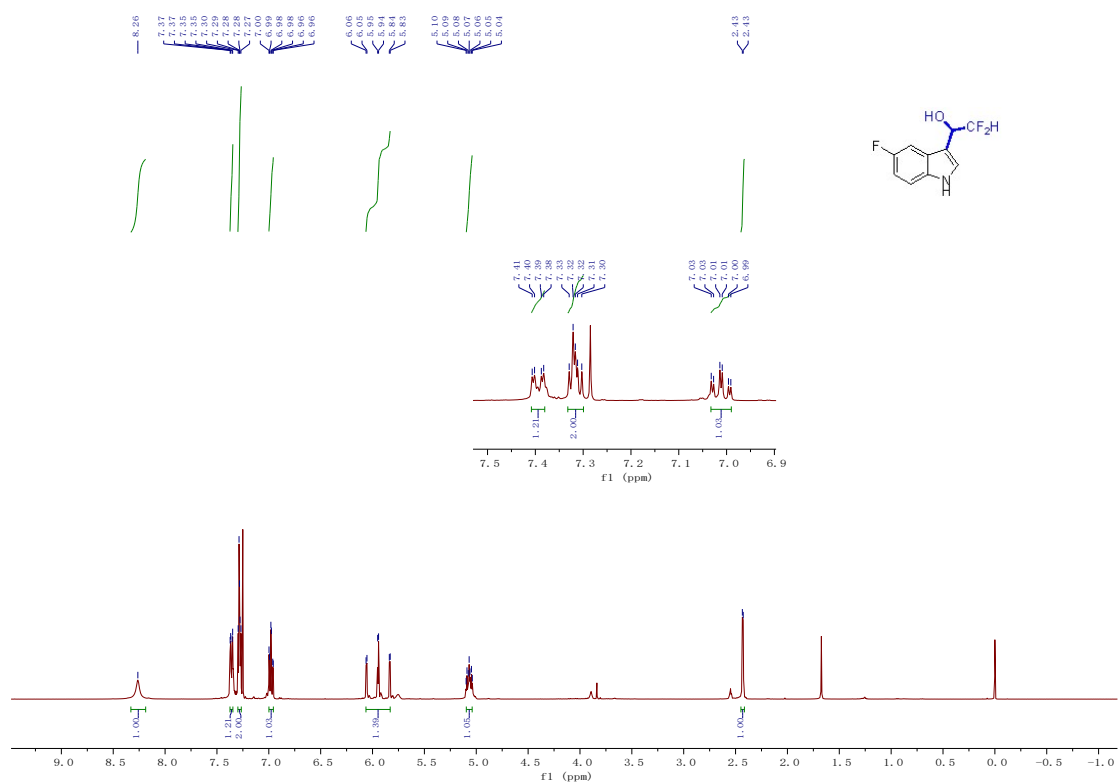

$^{13}\text{C}$  NMR (125 MHz, Chloroform-*d*) spectra of **3n**

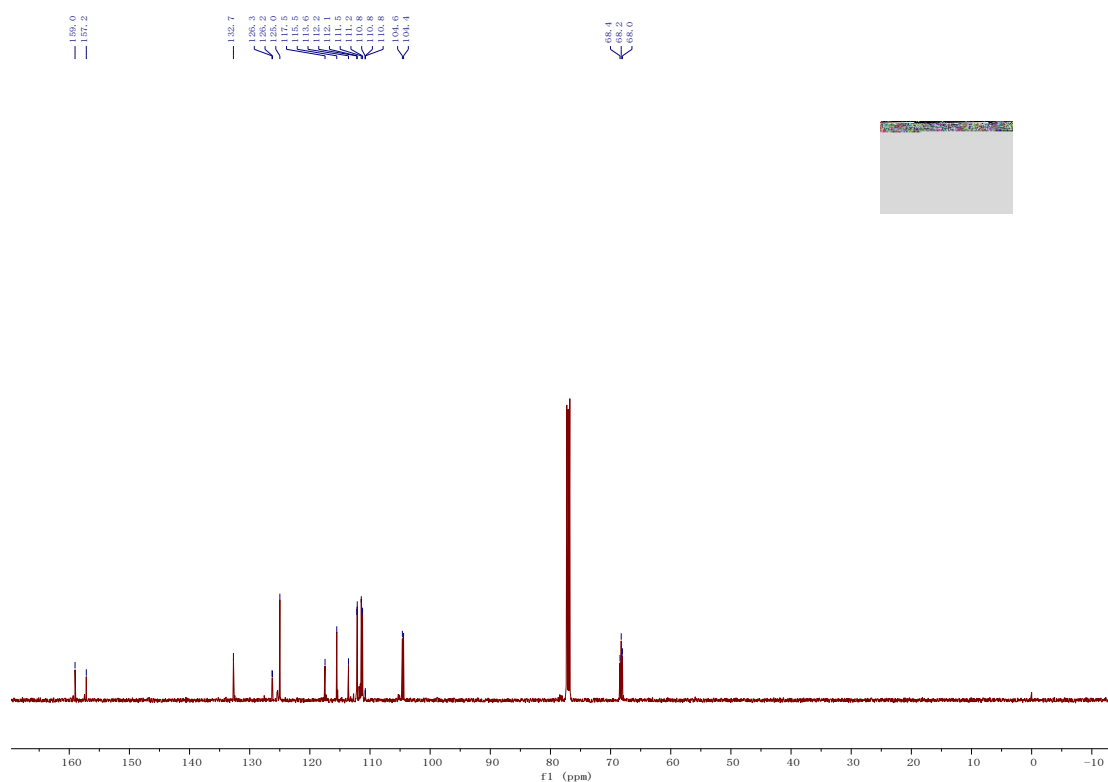

$^{19}\text{F}$  NMR (470 MHz, Chloroform-*d*) spectra of **3n**

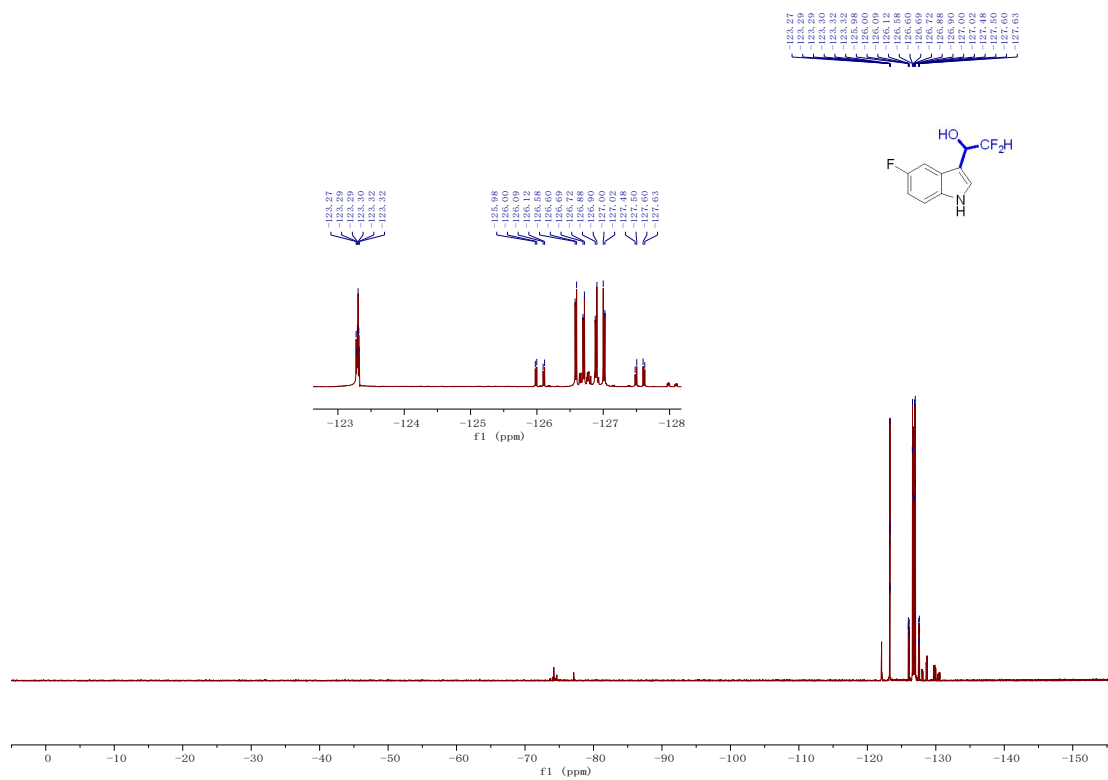

$^1\text{H}$  NMR (500 MHz, Chloroform-*d*) spectra of **3o**

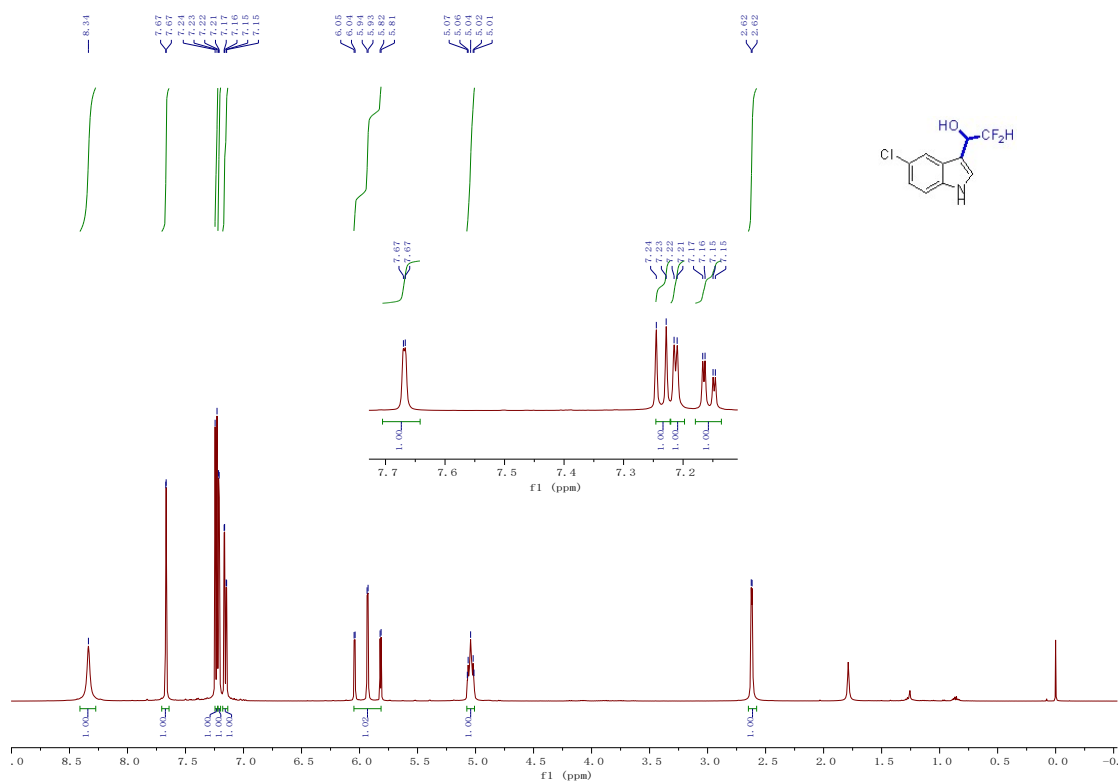

$^{13}\text{C}$  NMR (125 MHz, Chloroform-*d*) spectra of **3o**

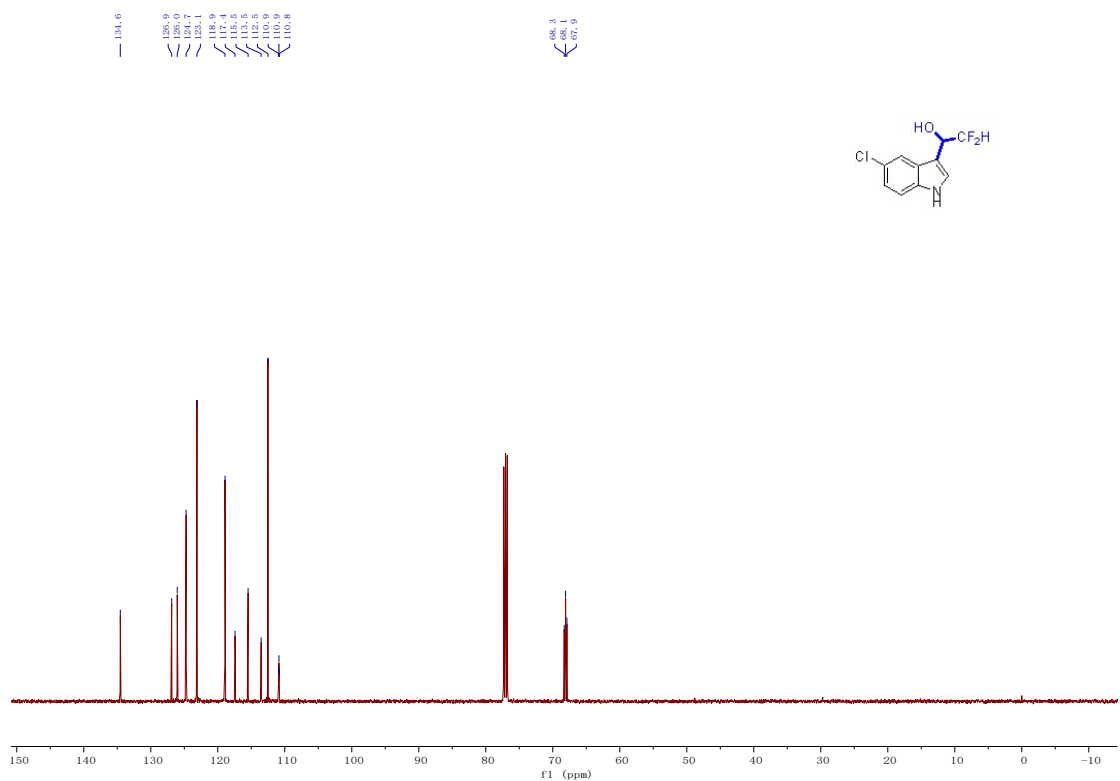

$^{19}\text{F}$  NMR (470 MHz, Chloroform-*d*) spectra of **3o**

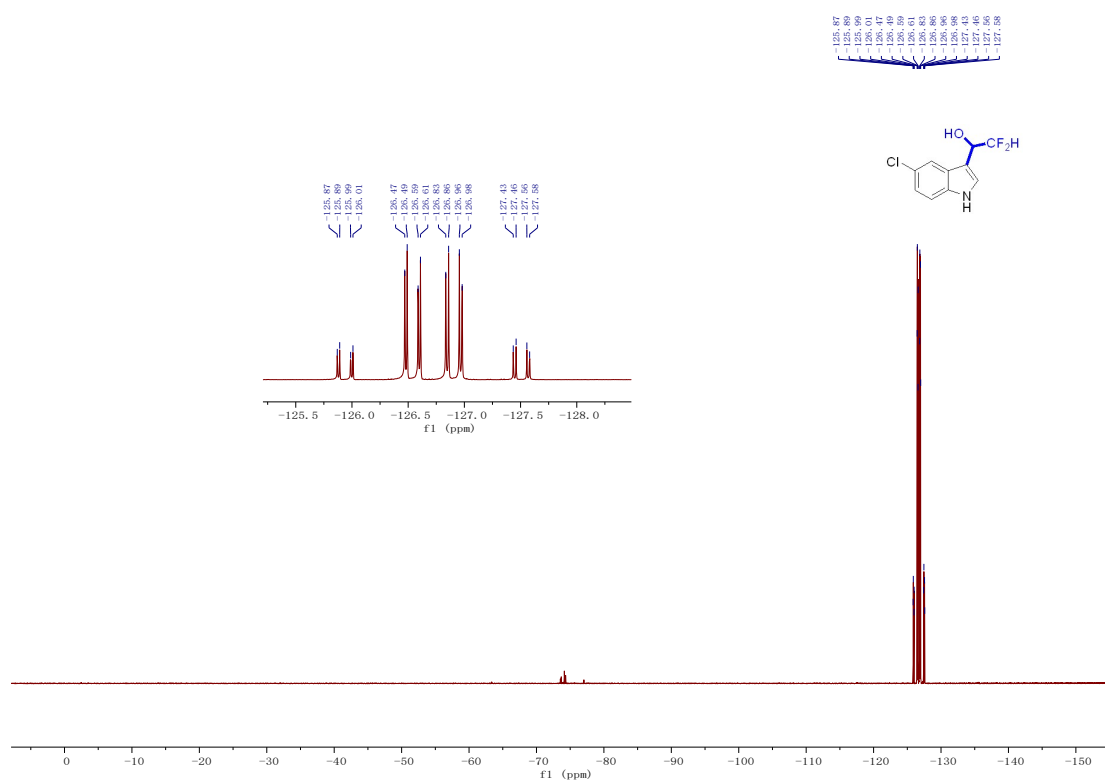

$^1\text{H}$  NMR (500 MHz, Chloroform-*d*) spectra of **3p**

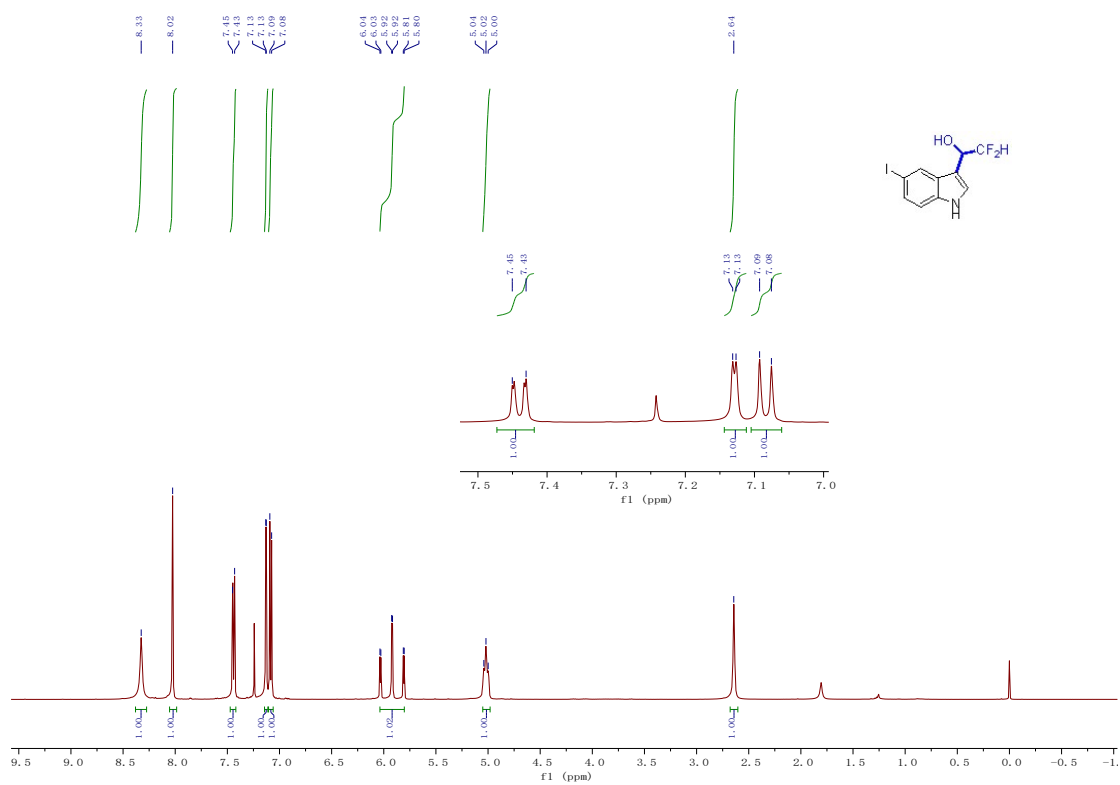



$^{13}\text{C}$  NMR (125 MHz, Chloroform-*d*) spectra of **3p**

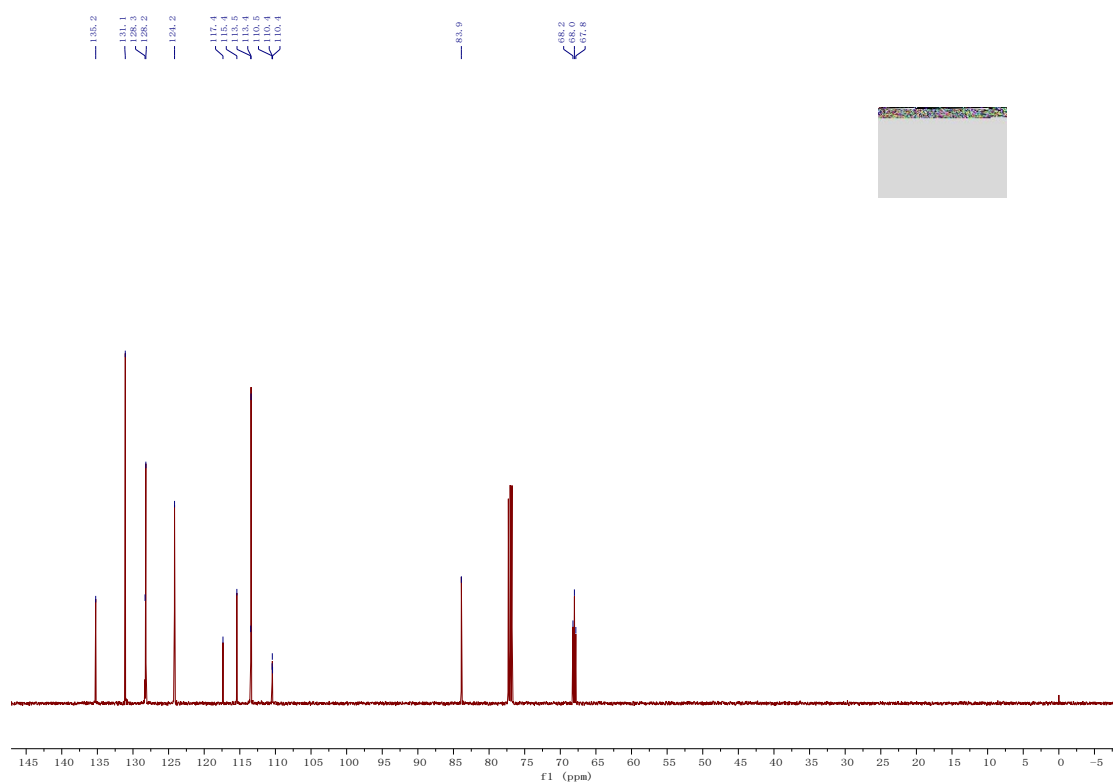

$^{19}\text{F}$  NMR (470 MHz, Chloroform-*d*) spectra of **3p**

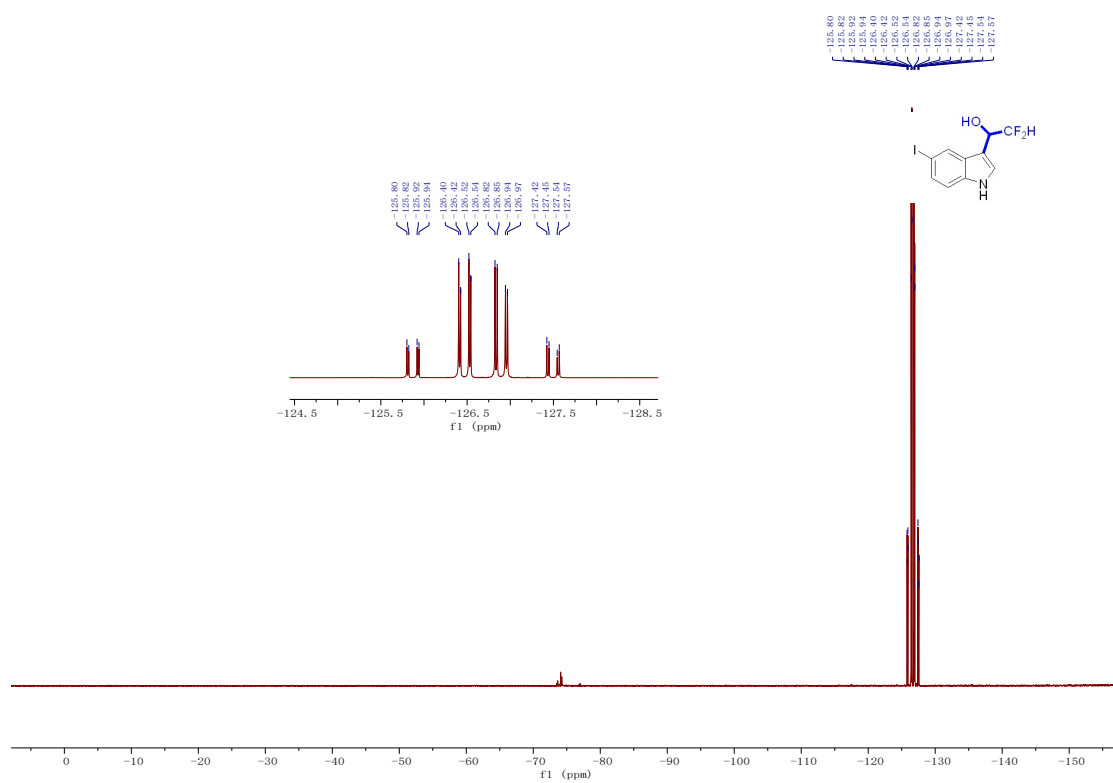

<sup>1</sup>H NMR (500 MHz, DMSO-*d*<sub>6</sub>) spectra of **3q**

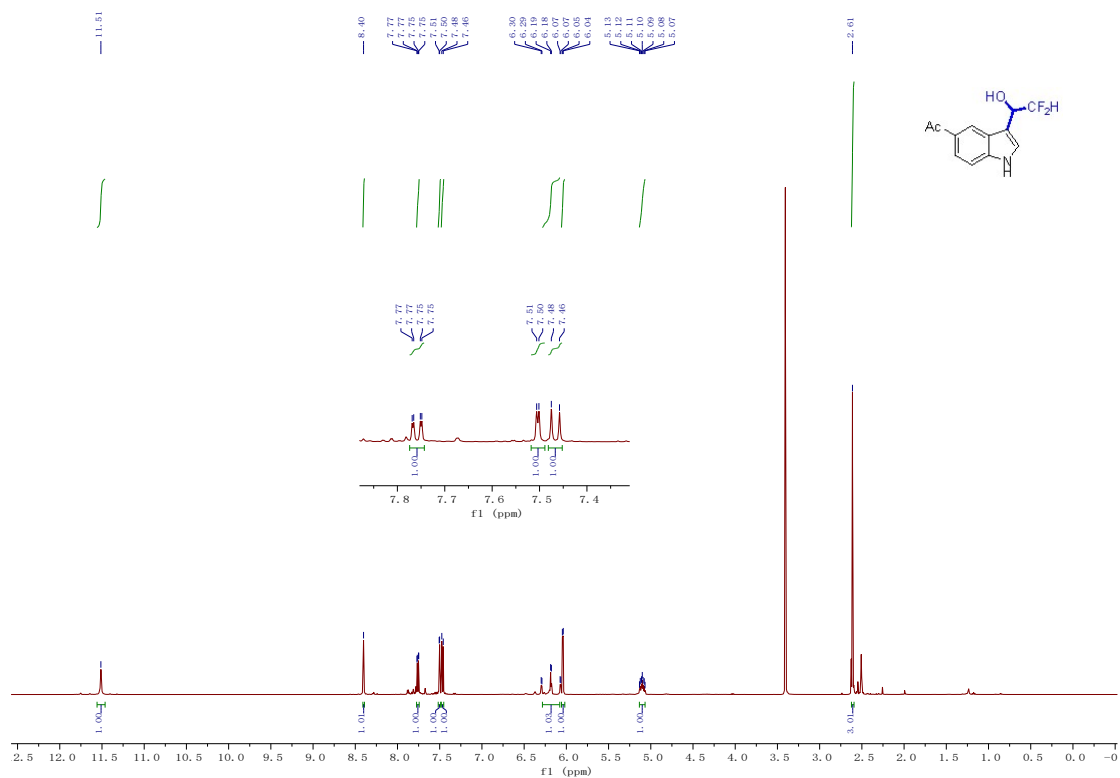

<sup>13</sup>C NMR (125 MHz, DMSO-*d*<sub>6</sub>) spectra of **3q**

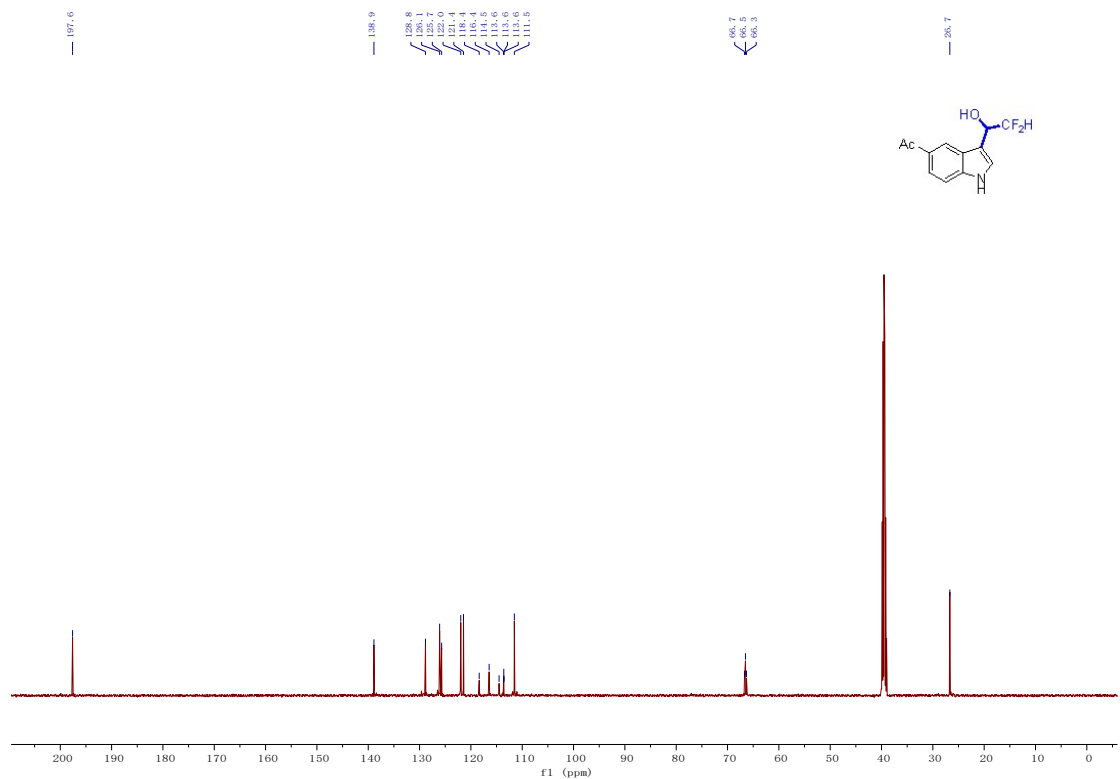

<sup>19</sup>F NMR (470 MHz, DMSO-*d*<sub>6</sub>) spectra of **3q**

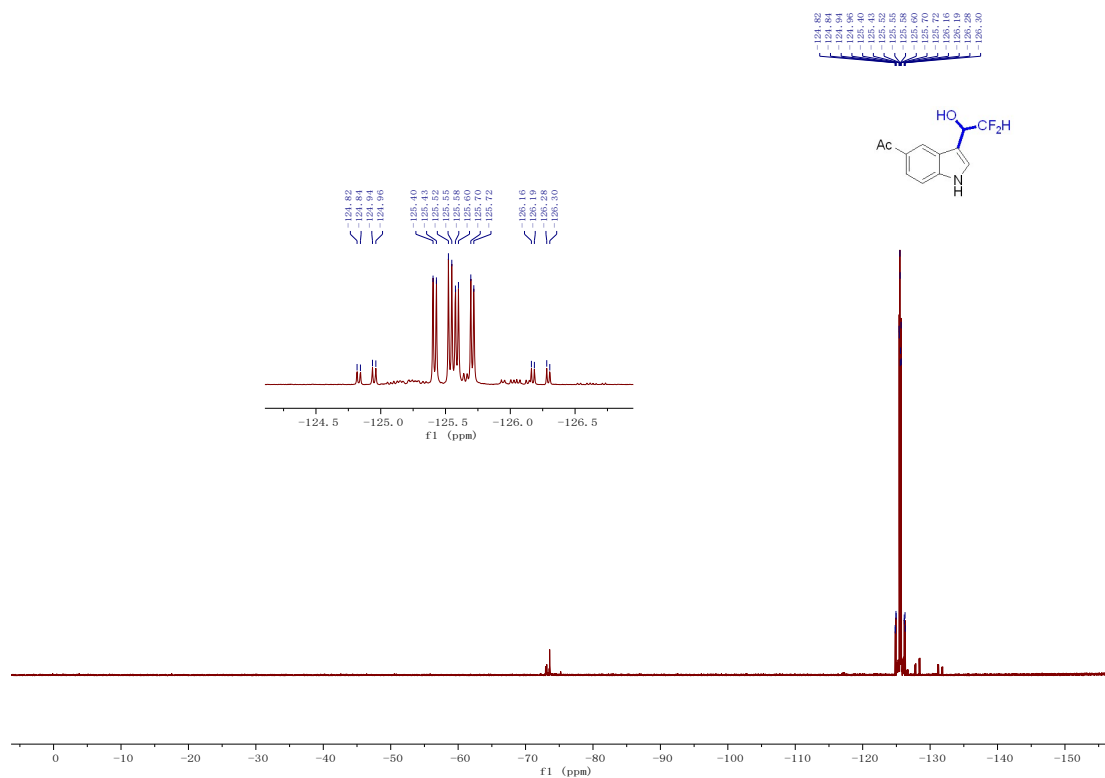

<sup>1</sup>H NMR (500 MHz, Methanol-*d*<sub>4</sub>) spectra of **3r**

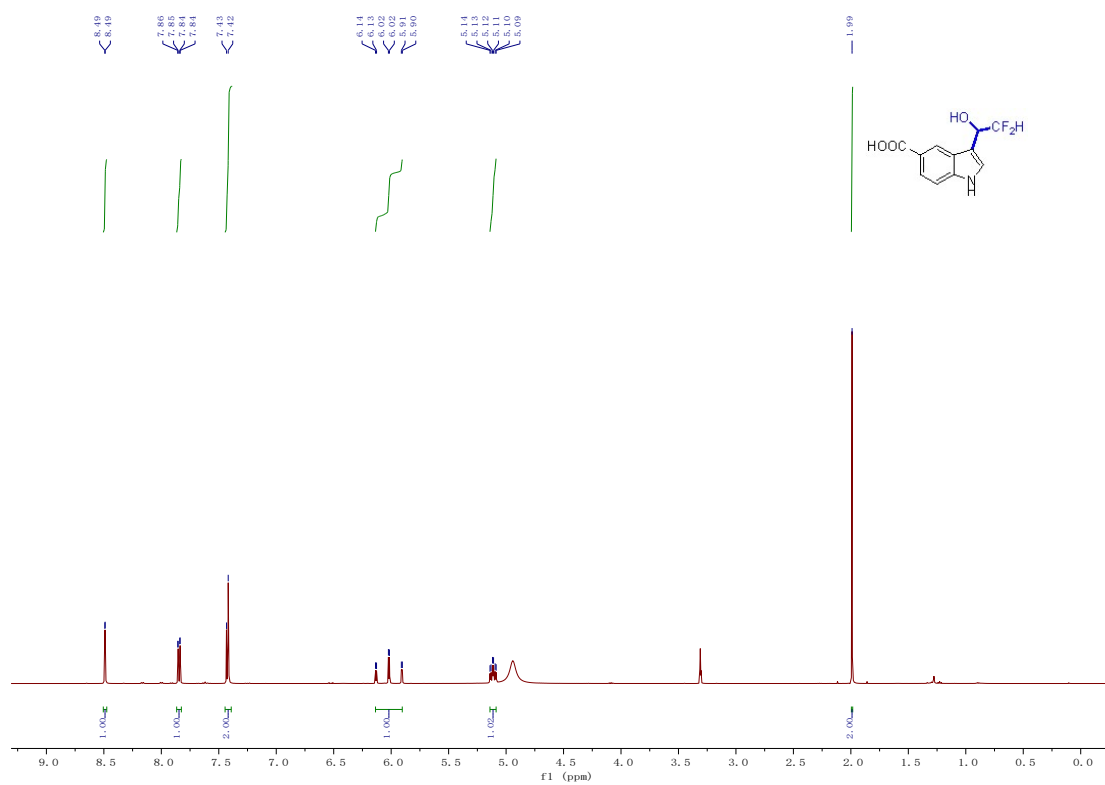

<sup>13</sup>C NMR (125 MHz, Methanol-*d*<sub>4</sub>) spectra of **3r**

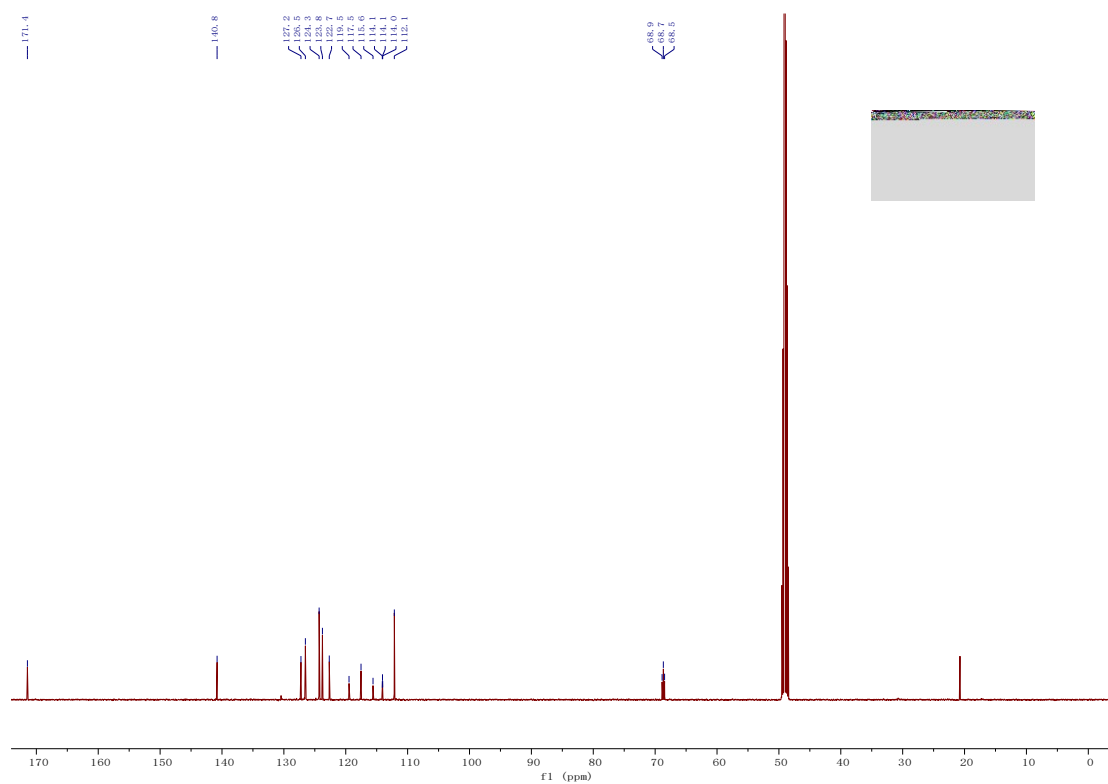

<sup>19</sup>F NMR (470 MHz, Methanol-*d*<sub>4</sub>) spectra of **3r**

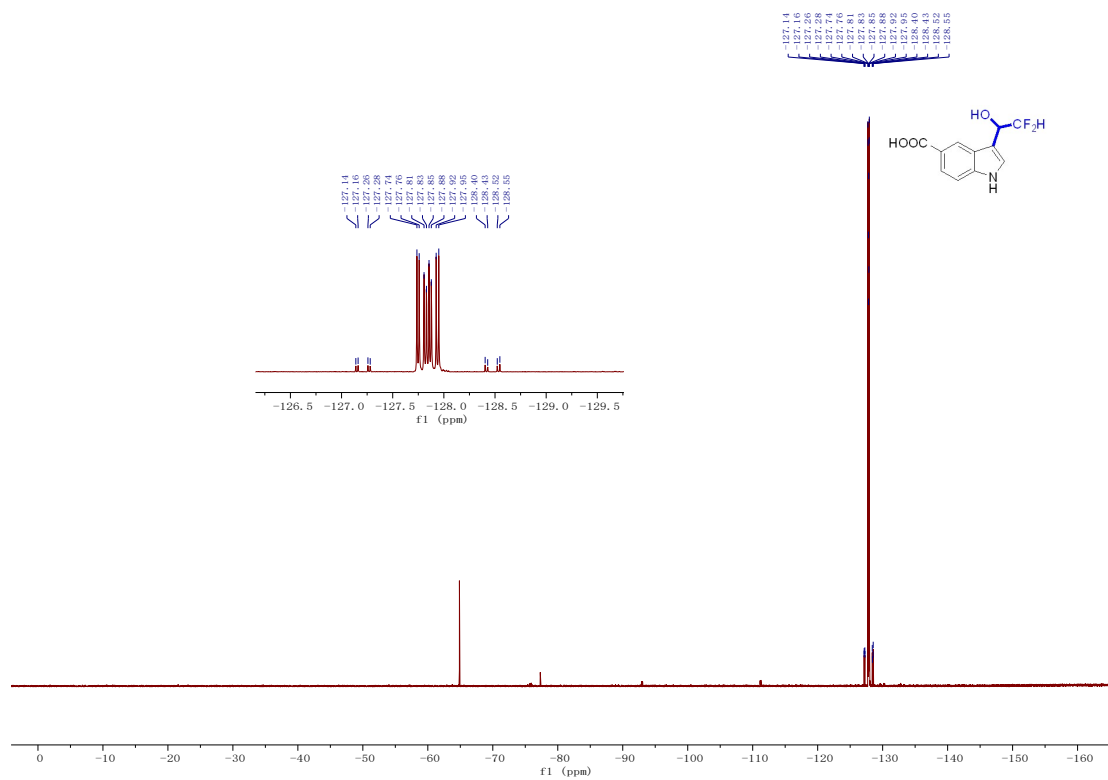

<sup>1</sup>H NMR (500 MHz, Methanol-*d*<sub>4</sub>) spectra of **3s**

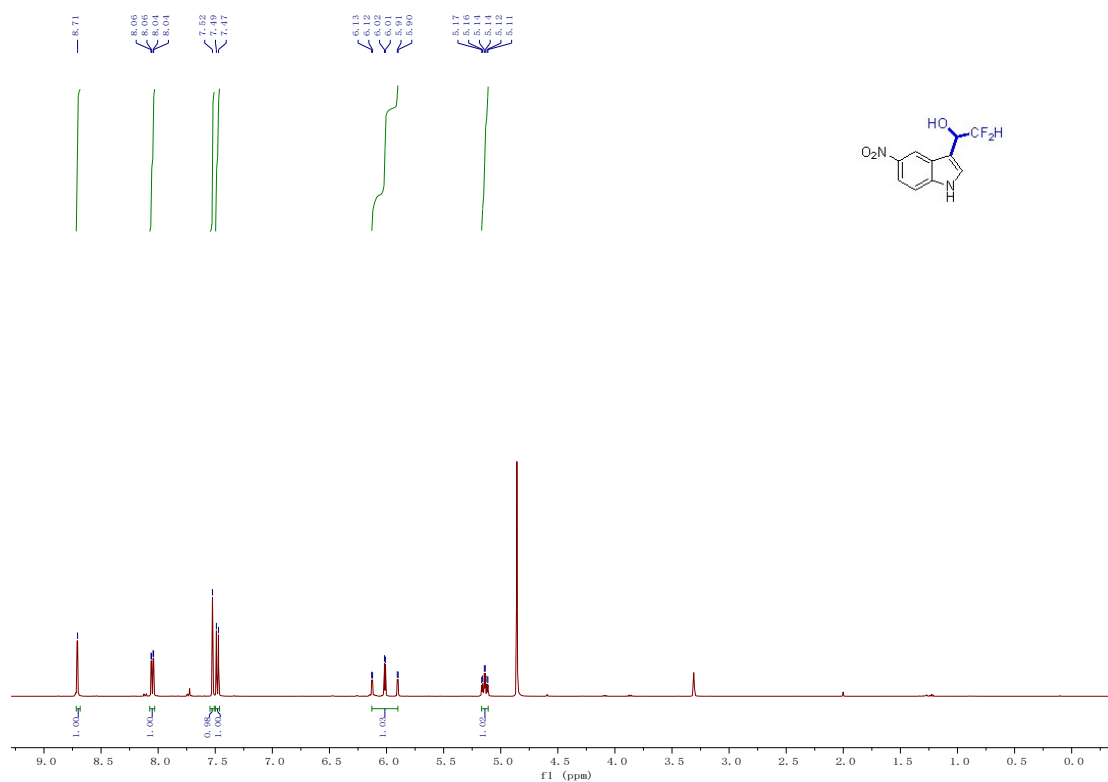

<sup>13</sup>C NMR (125 MHz, Methanol-*d*<sub>4</sub>) spectra of **3s**

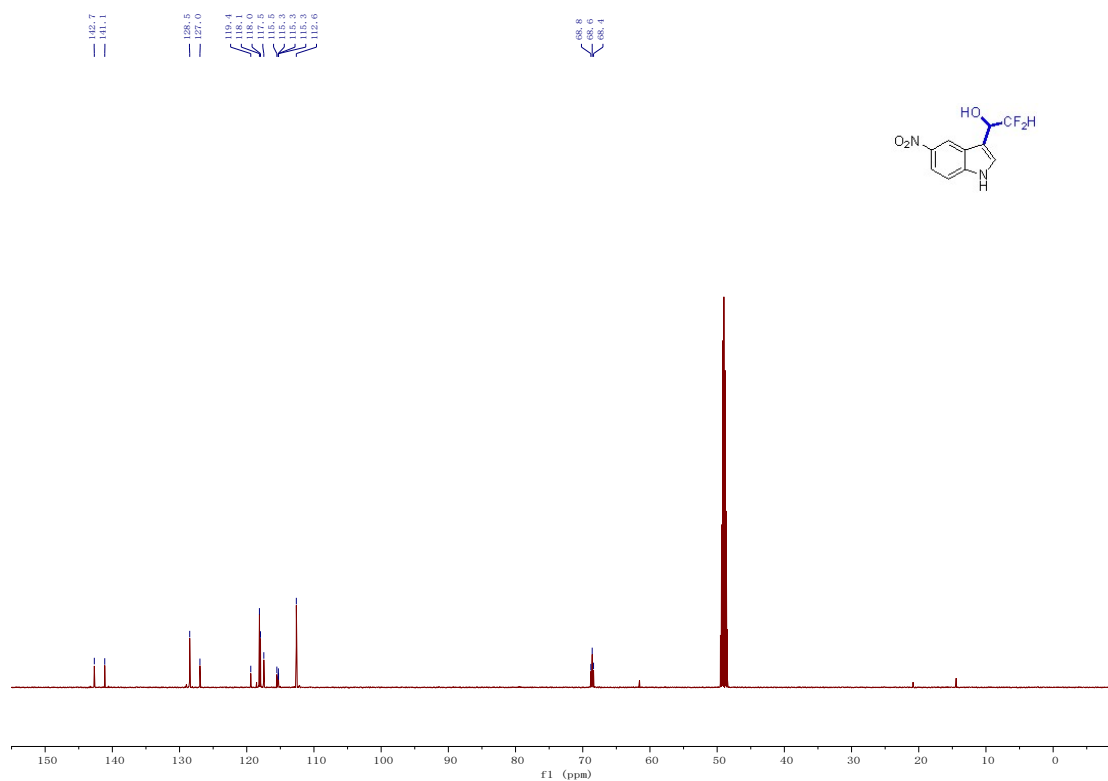

$^{19}\text{F}$  NMR (470 MHz, Methanol- $d_4$ ) spectra of **3s**

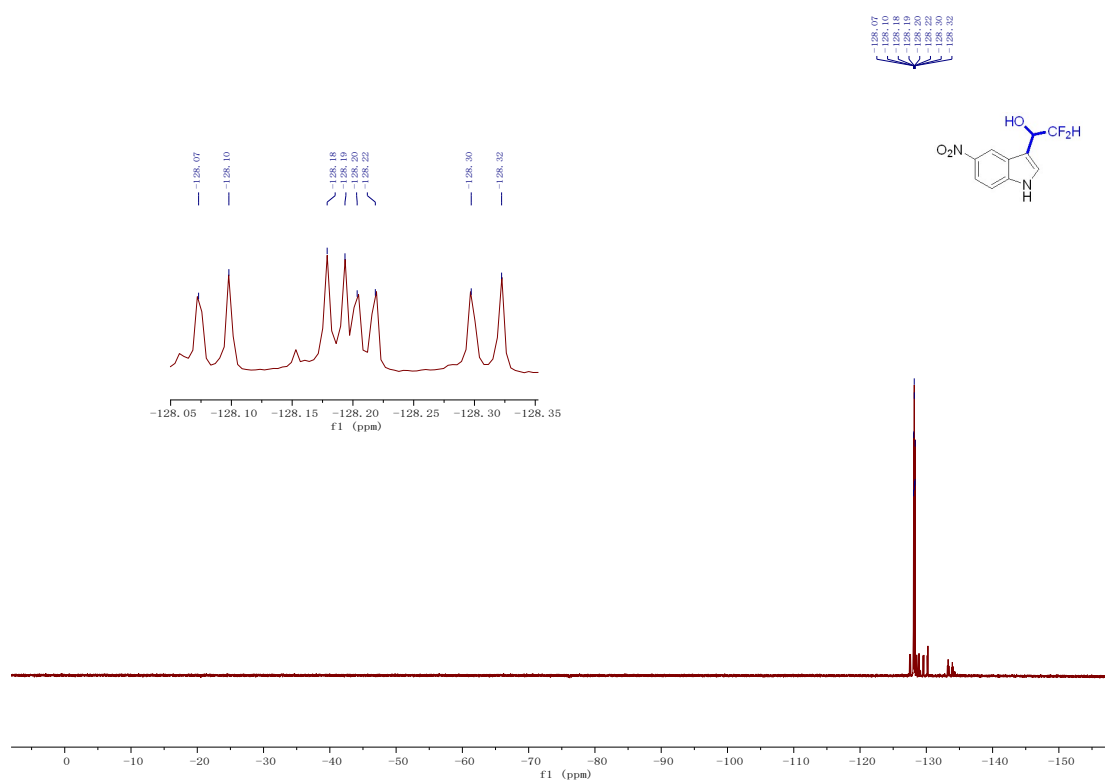

$^1\text{H}$  NMR (500 MHz, Chloroform- $d$ ) spectra of **3t**

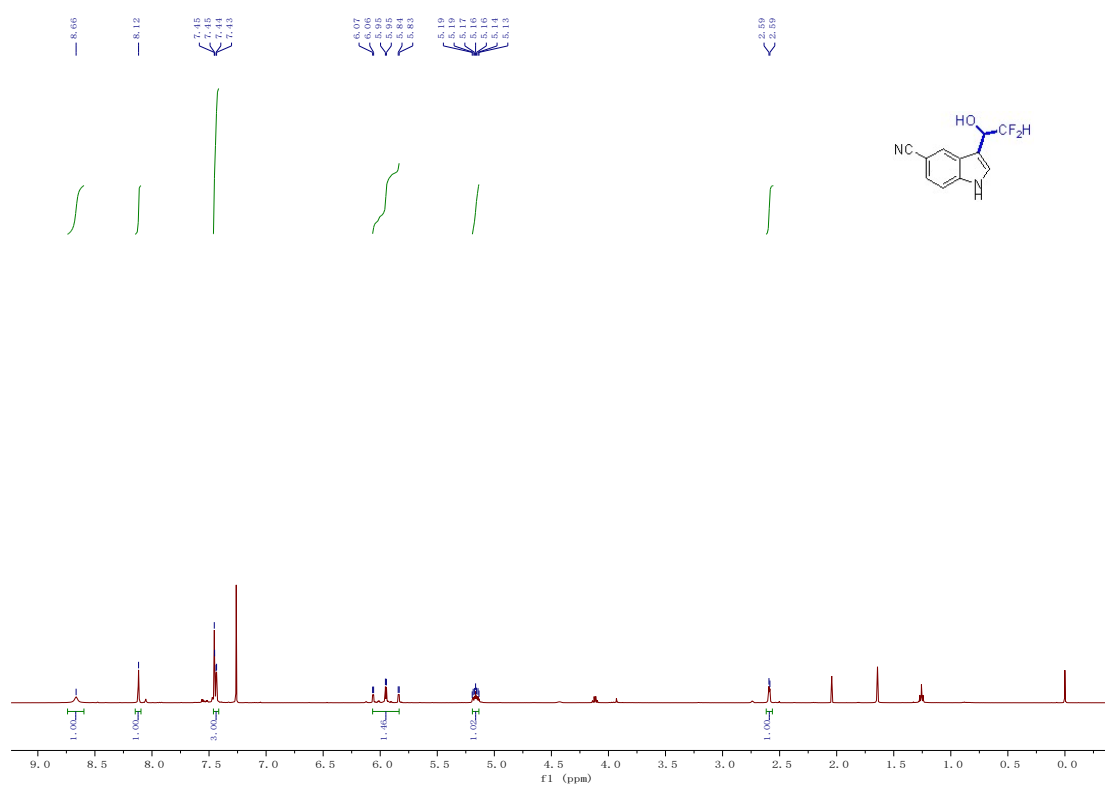

$^{13}\text{C}$  NMR (125 MHz, Chloroform-*d*) spectra of **3t**

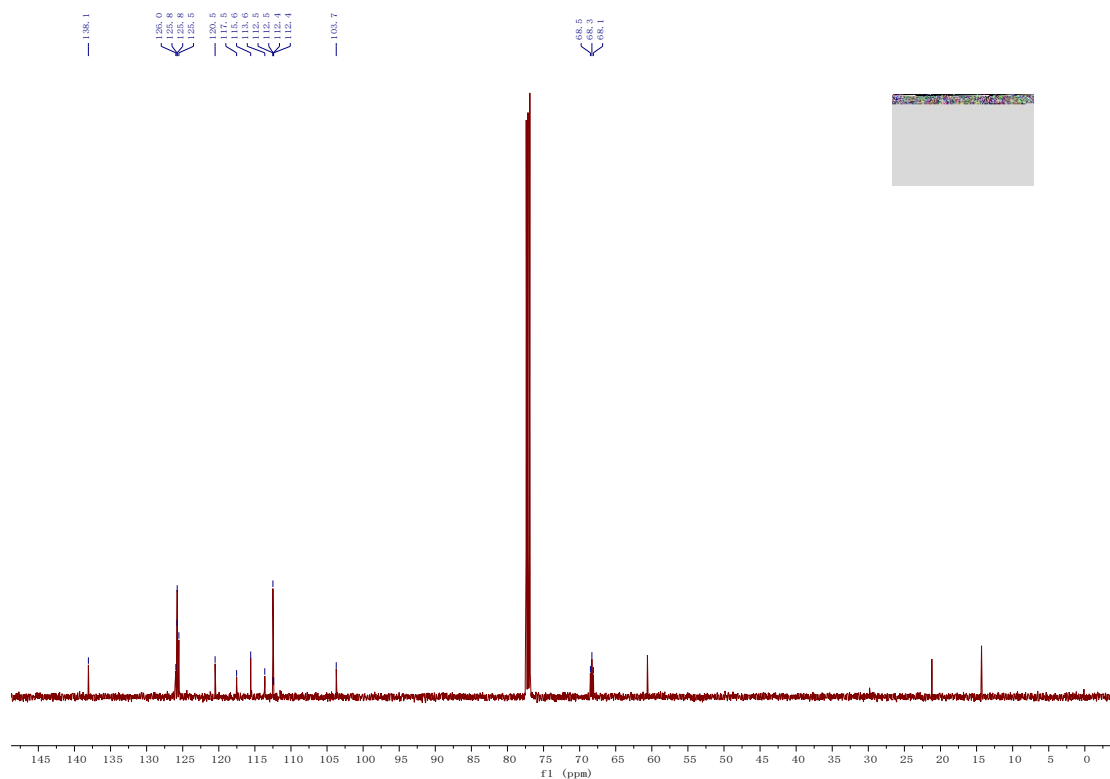

$^{19}\text{F}$  NMR (470 MHz, Chloroform-*d*) spectra of **3t**

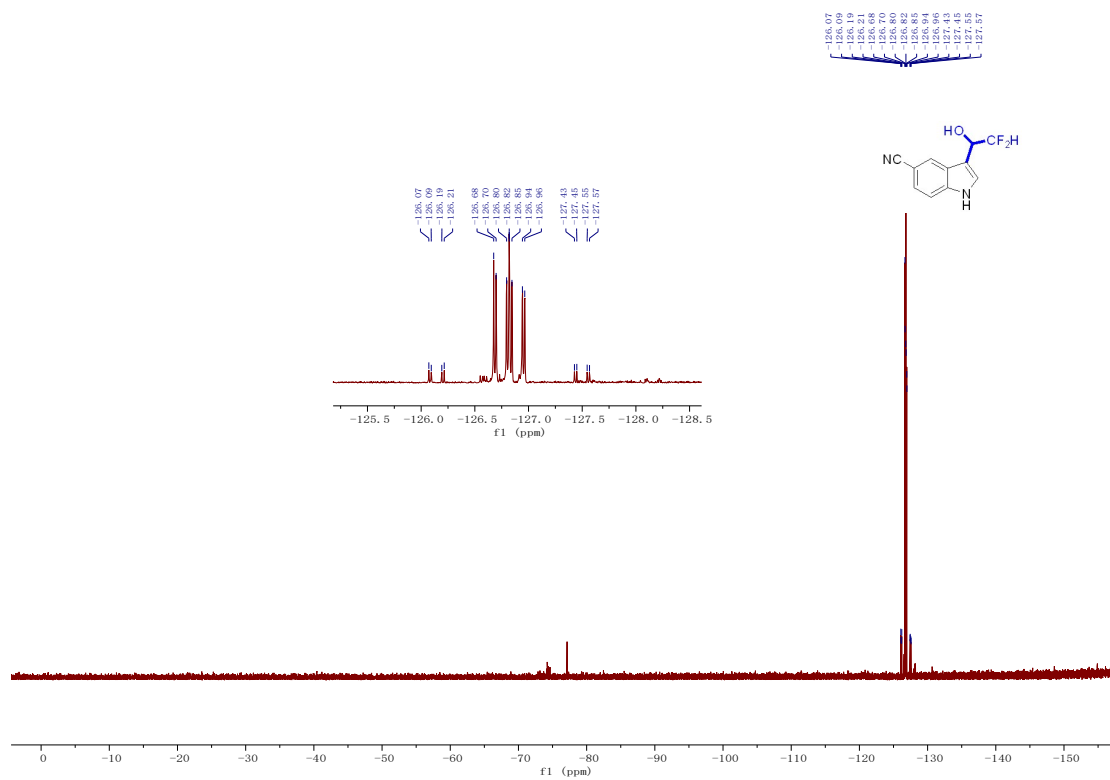

$^1\text{H}$  NMR (500 MHz,  $\text{DMSO-}d_6$ ) spectra of **3u**

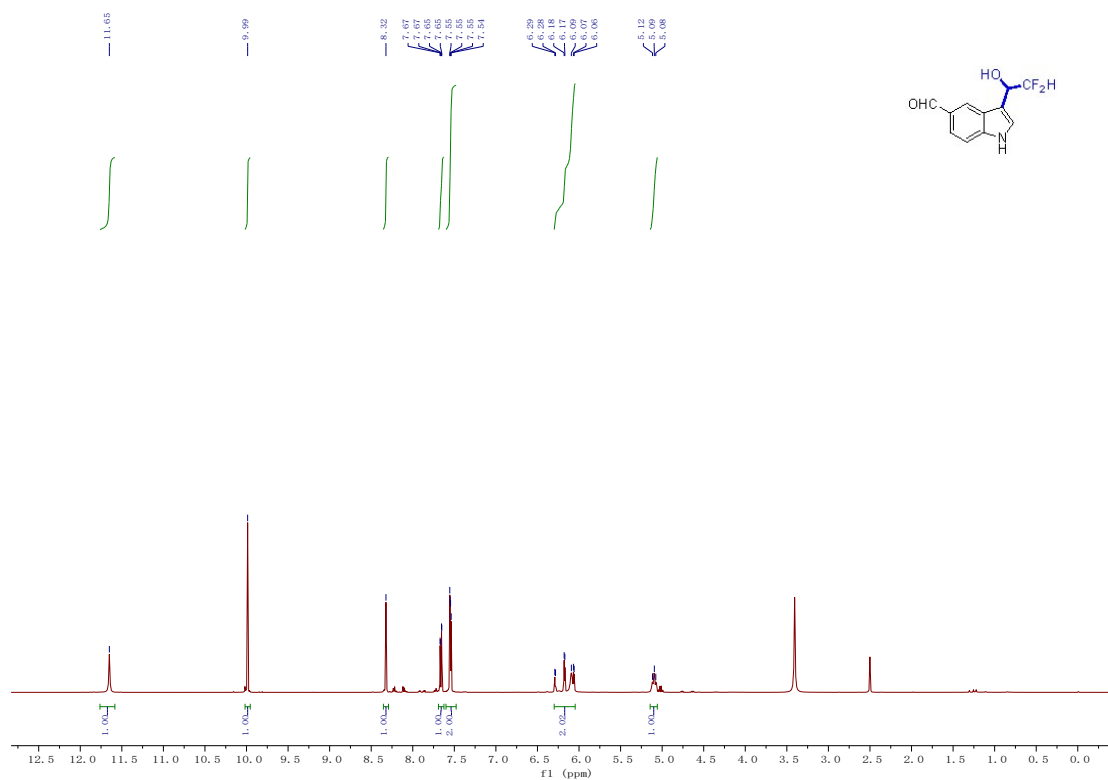

$^{13}\text{C}$  NMR (125 MHz,  $\text{DMSO-}d_6$ ) spectra of **3u**

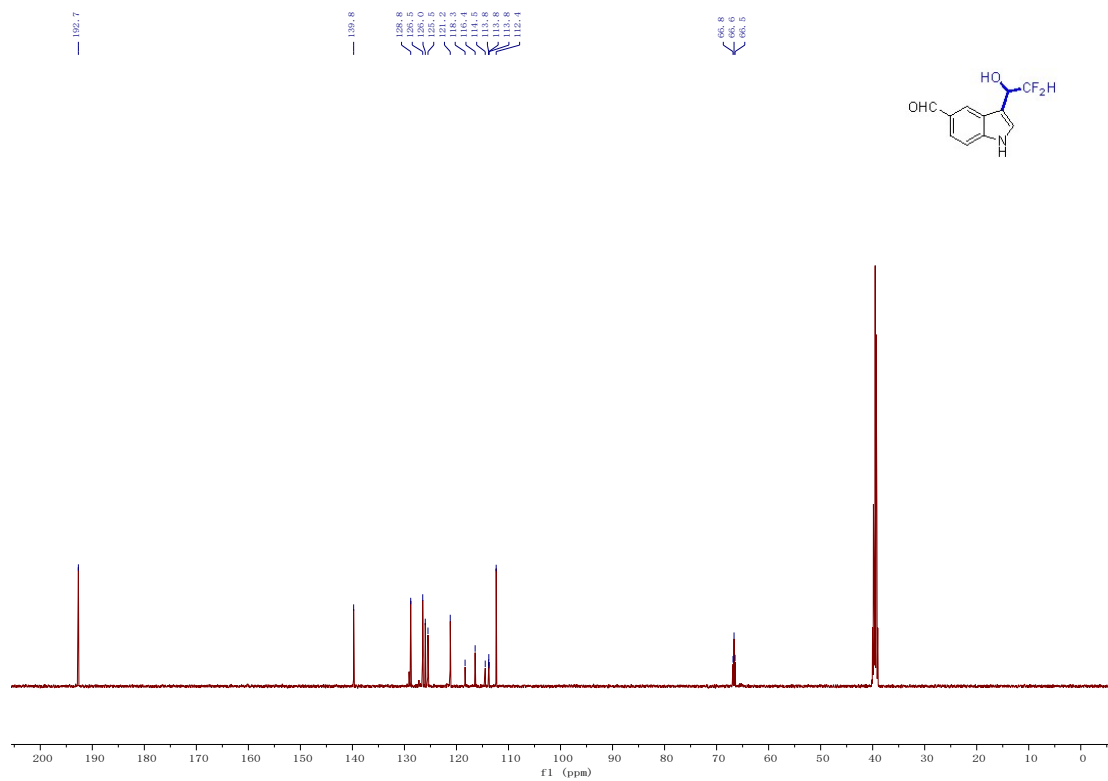



$^{19}\text{F}$  NMR (470 MHz,  $\text{DMSO-}d_6$ ) spectra of **3u**

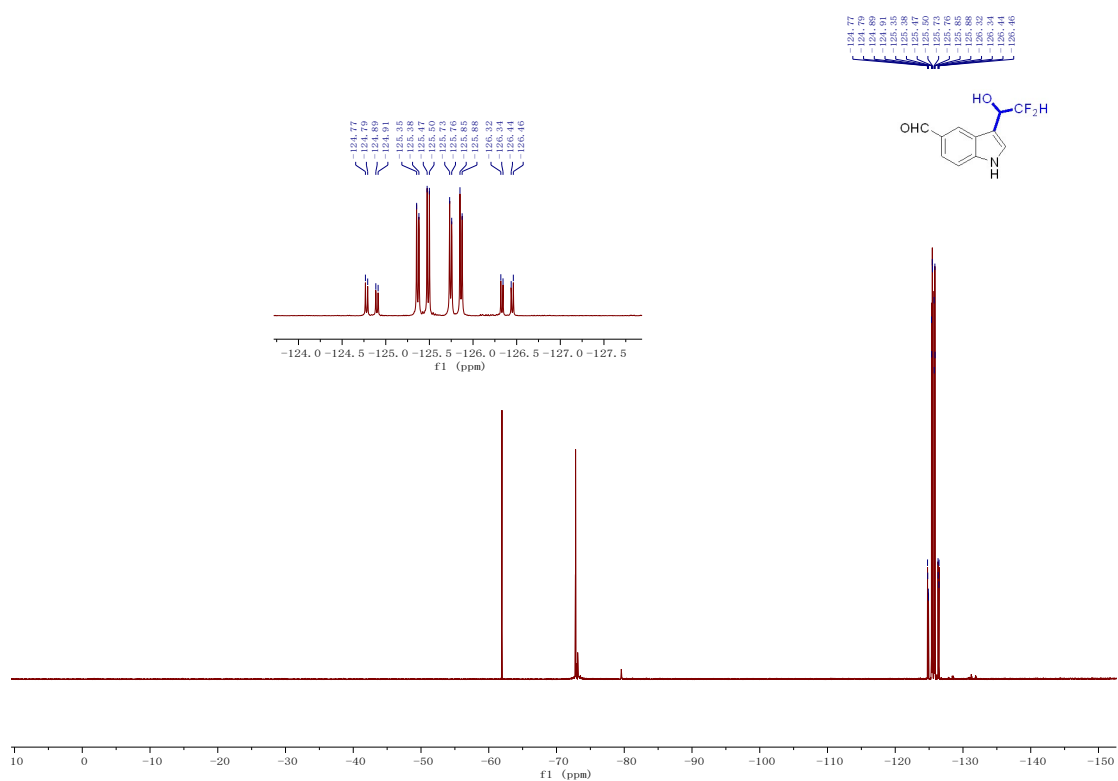

$^1\text{H}$  NMR (500 MHz,  $\text{Methanol-}d_4$ ) spectra of **3v**

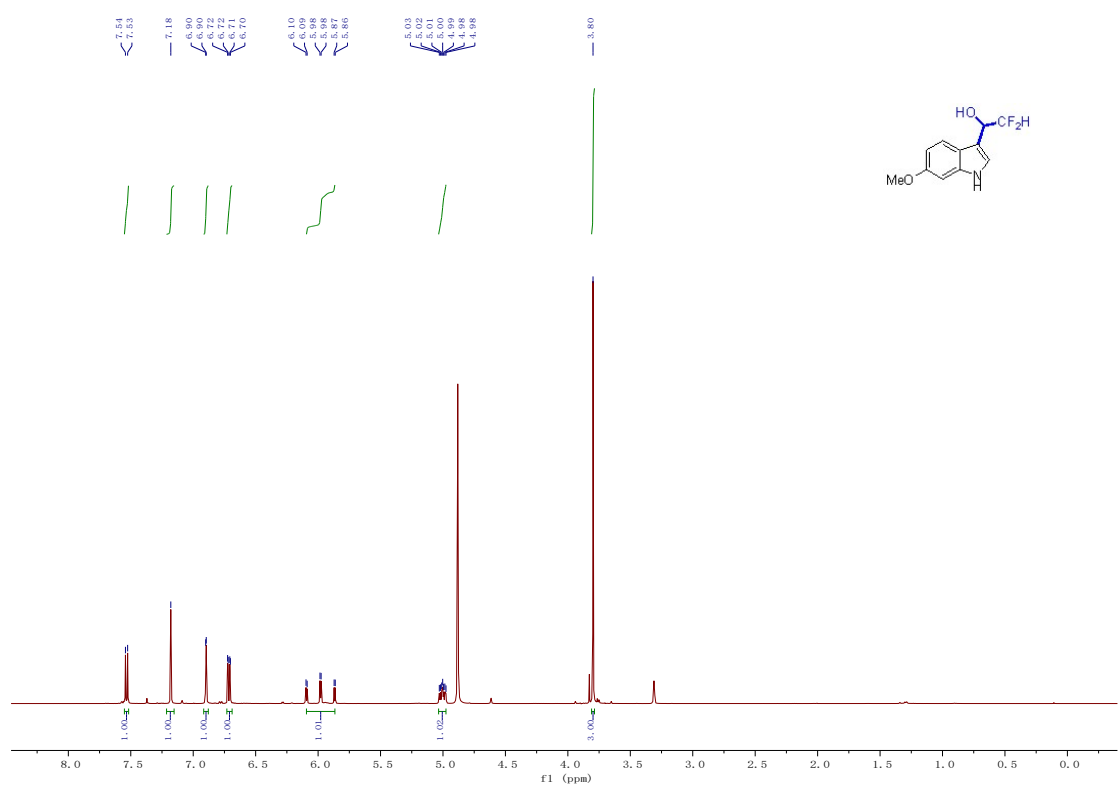

<sup>13</sup>C NMR (125 MHz, Methanol-*d*<sub>4</sub>) spectra of **3v**

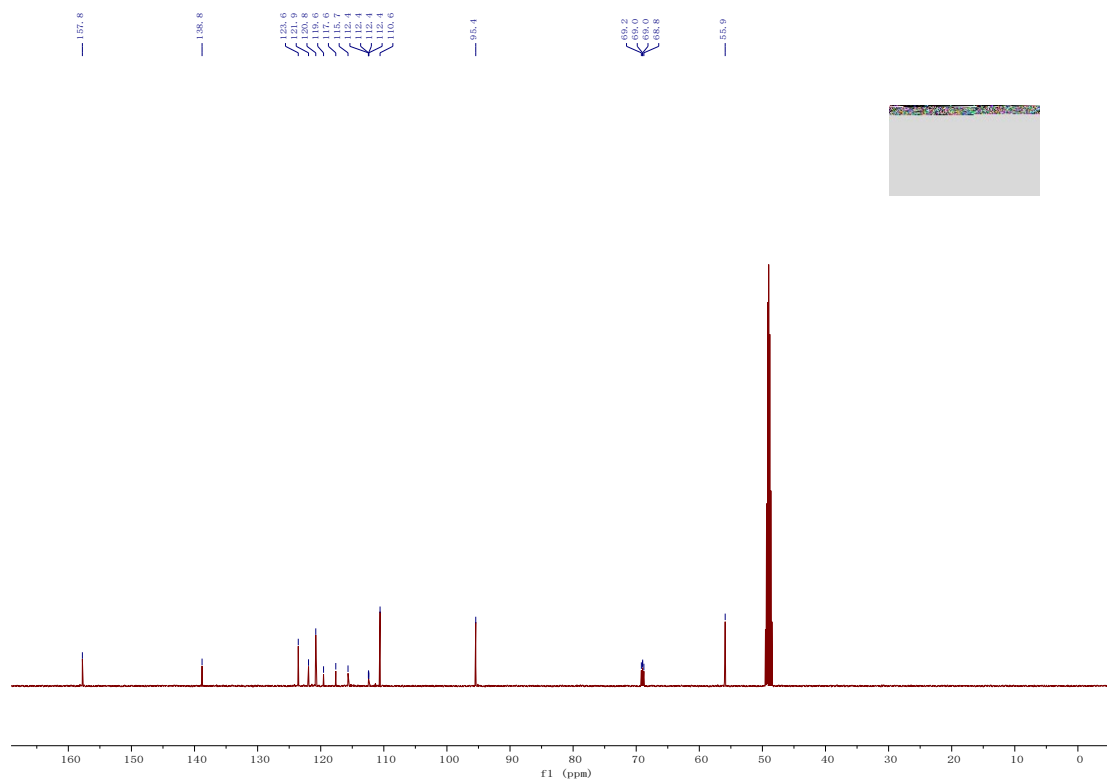

<sup>19</sup>F NMR (470 MHz, Methanol-*d*<sub>4</sub>) spectra of **3v**

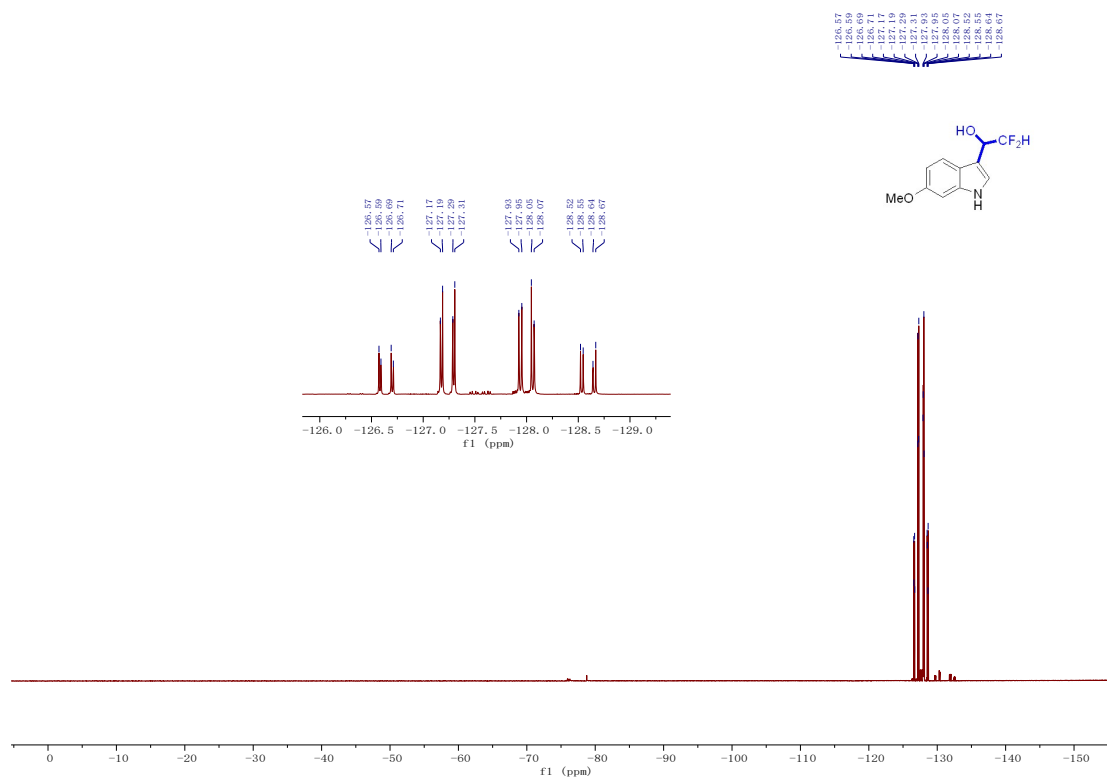

$^1\text{H}$  NMR (500 MHz, Chloroform-*d*) spectra of **3w**

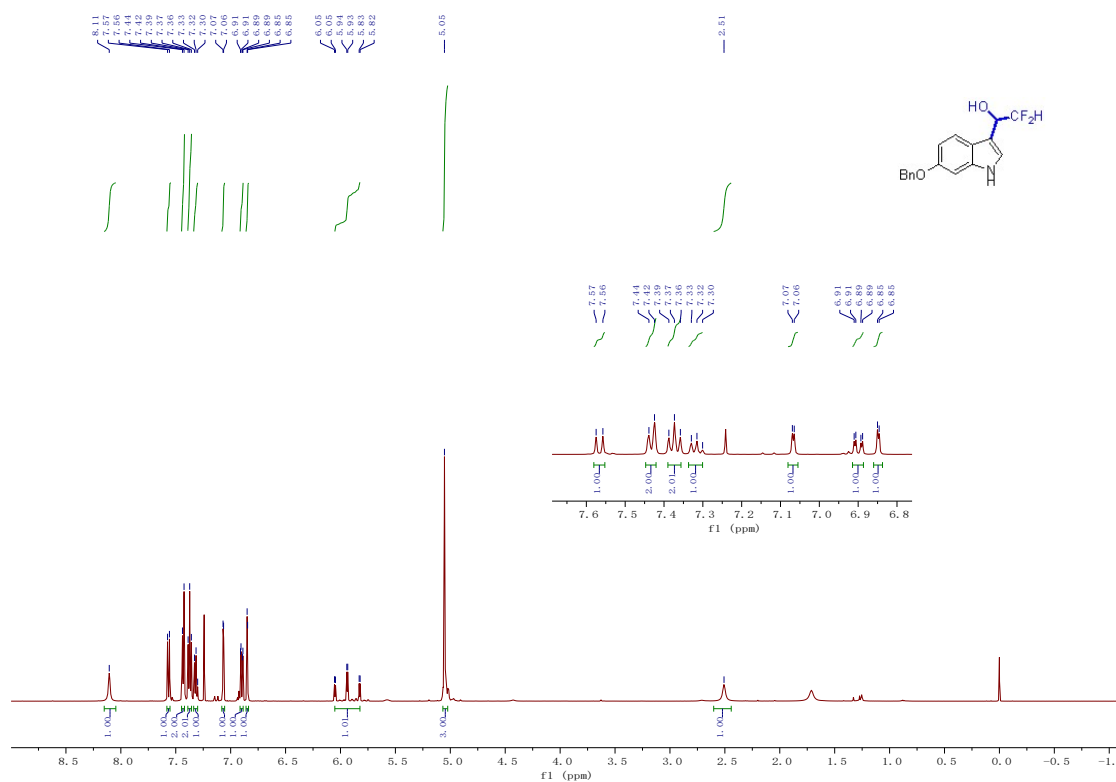

$^{13}\text{C}$  NMR (125 MHz, Chloroform-*d*) spectra of **3w**

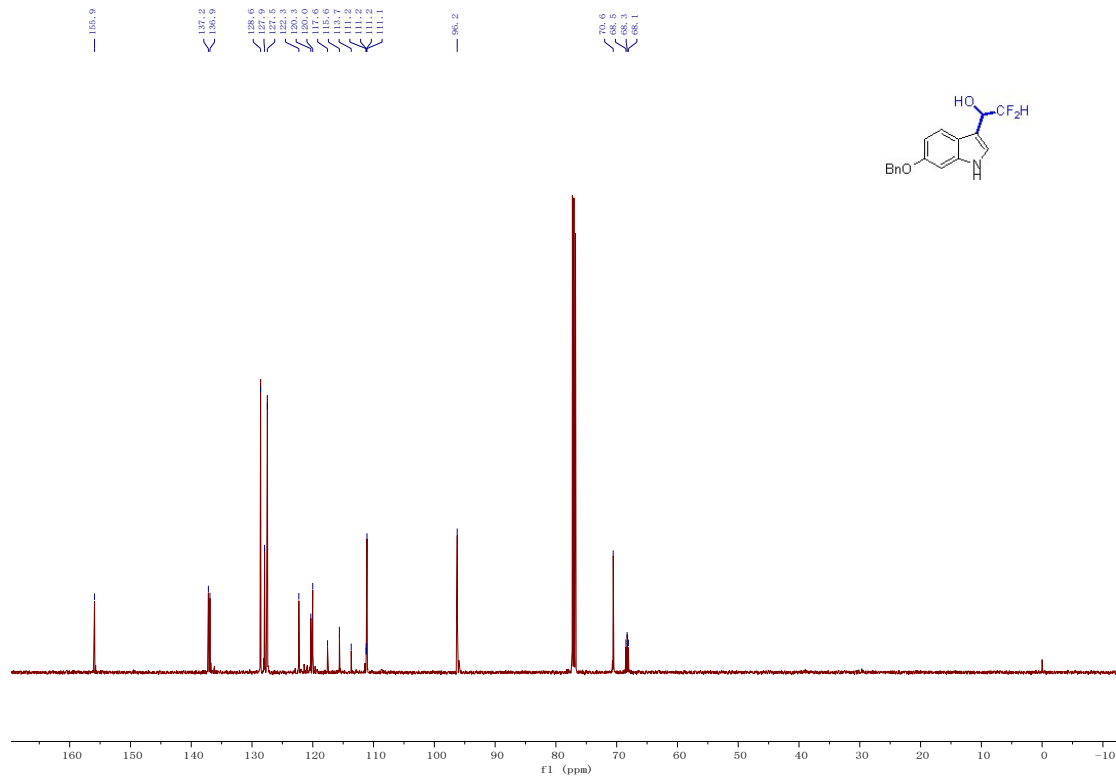

$^{19}\text{F}$  NMR (470 MHz, Chloroform-*d*) spectra of **3w**

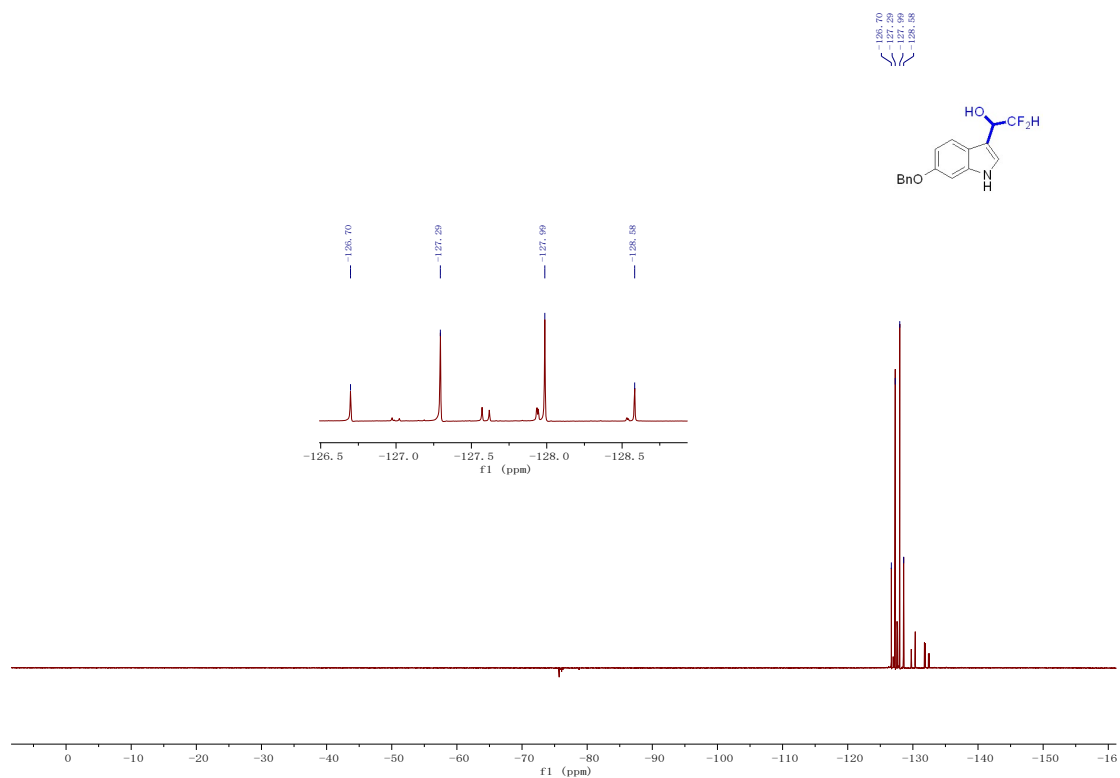

$^1\text{H}$  NMR (500 MHz, Chloroform-*d*) spectra of **3x**

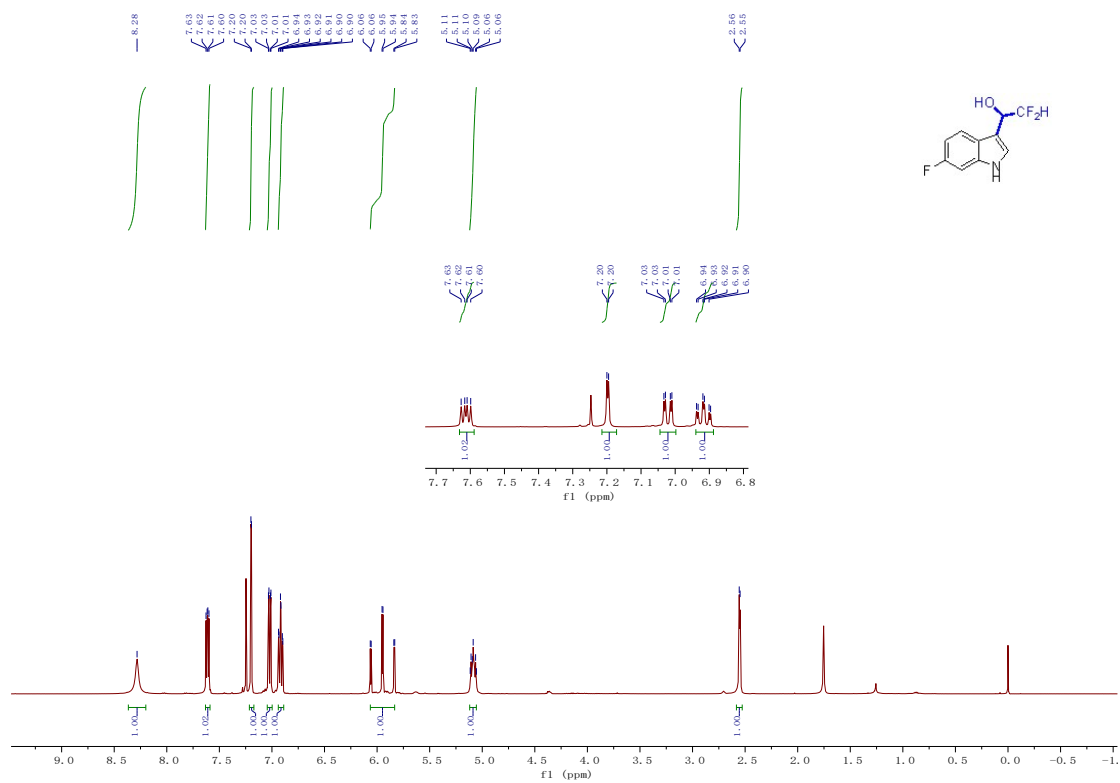

<sup>13</sup>C NMR (125 MHz, Chloroform-*d*) spectra of **3x**

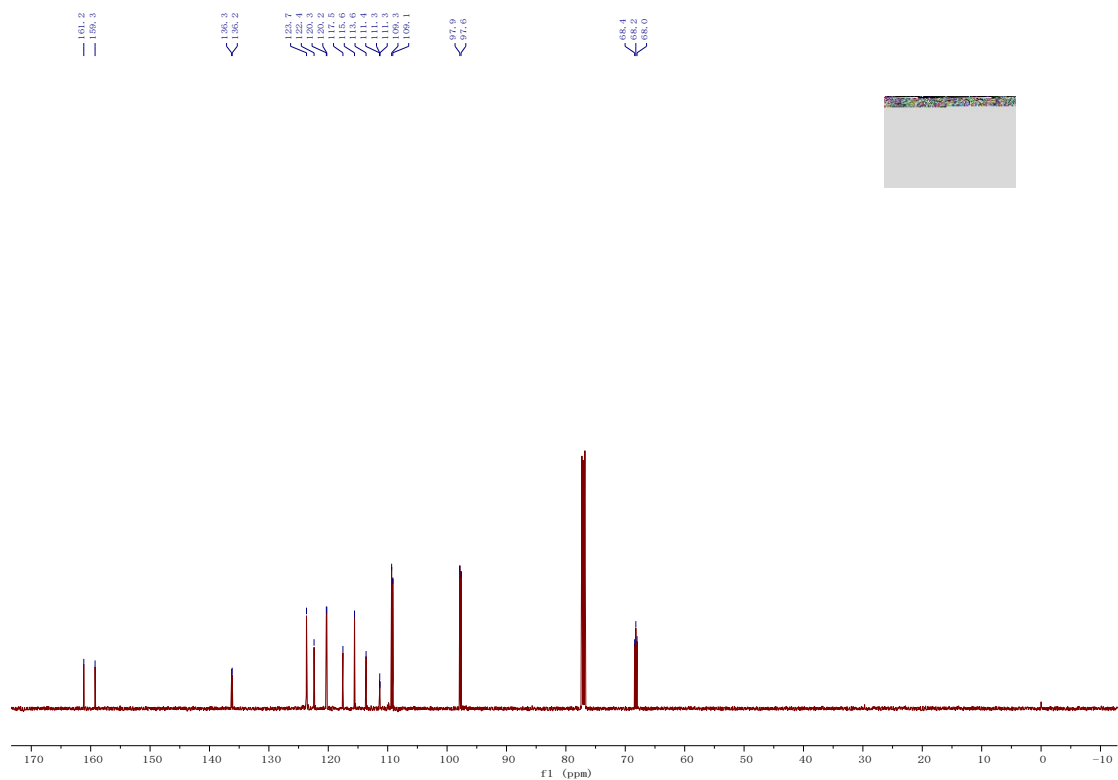

<sup>19</sup>F NMR (470 MHz, Chloroform-*d*) spectra of **3x**

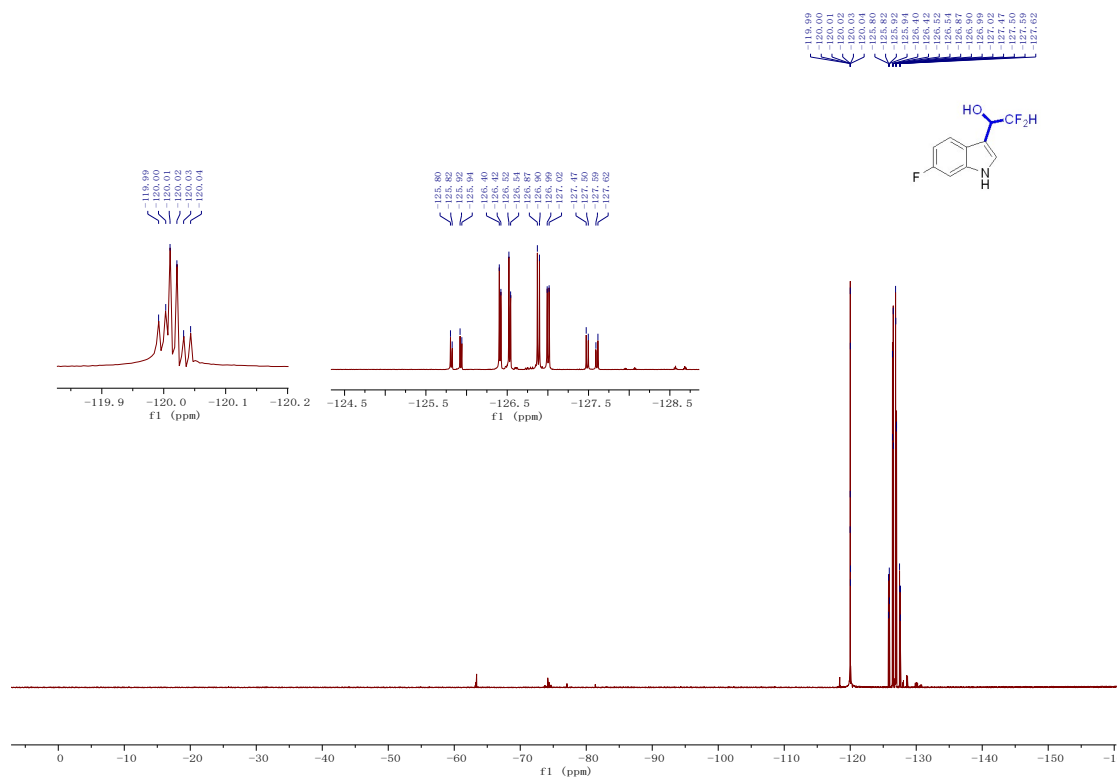

<sup>1</sup>H NMR (500 MHz, Chloroform-*d*) spectra of **3y**

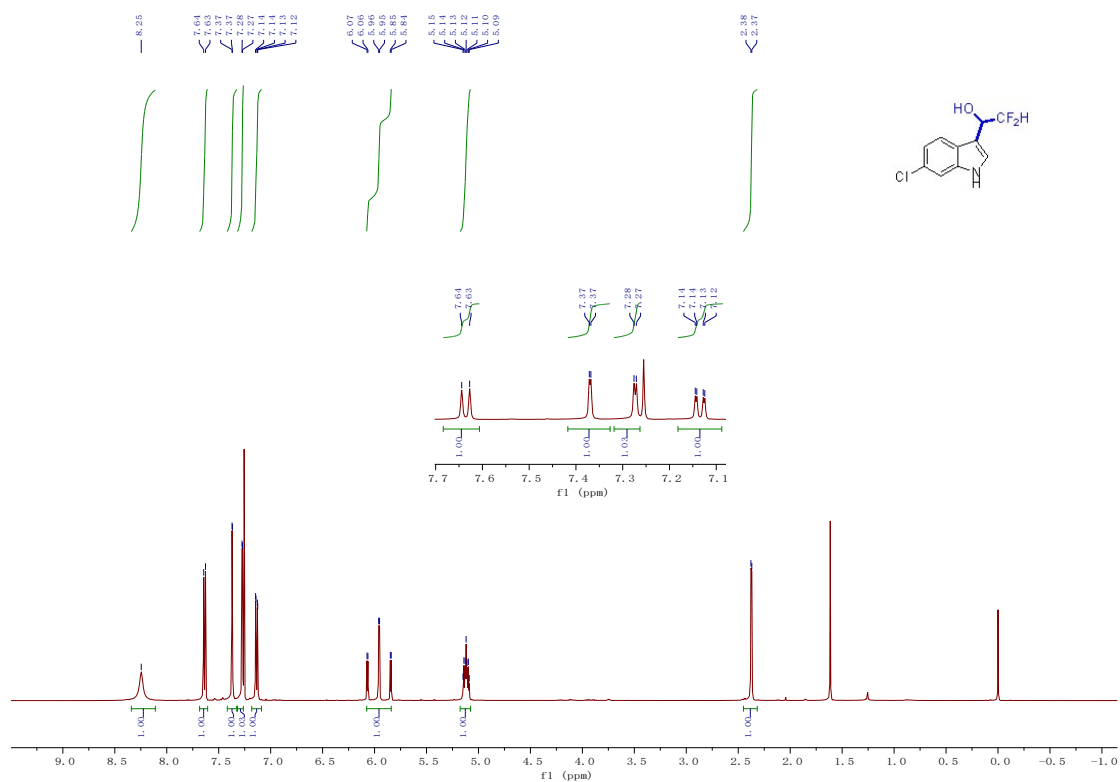

<sup>13</sup>C NMR (125 MHz, Chloroform-*d*) spectra of **3y**

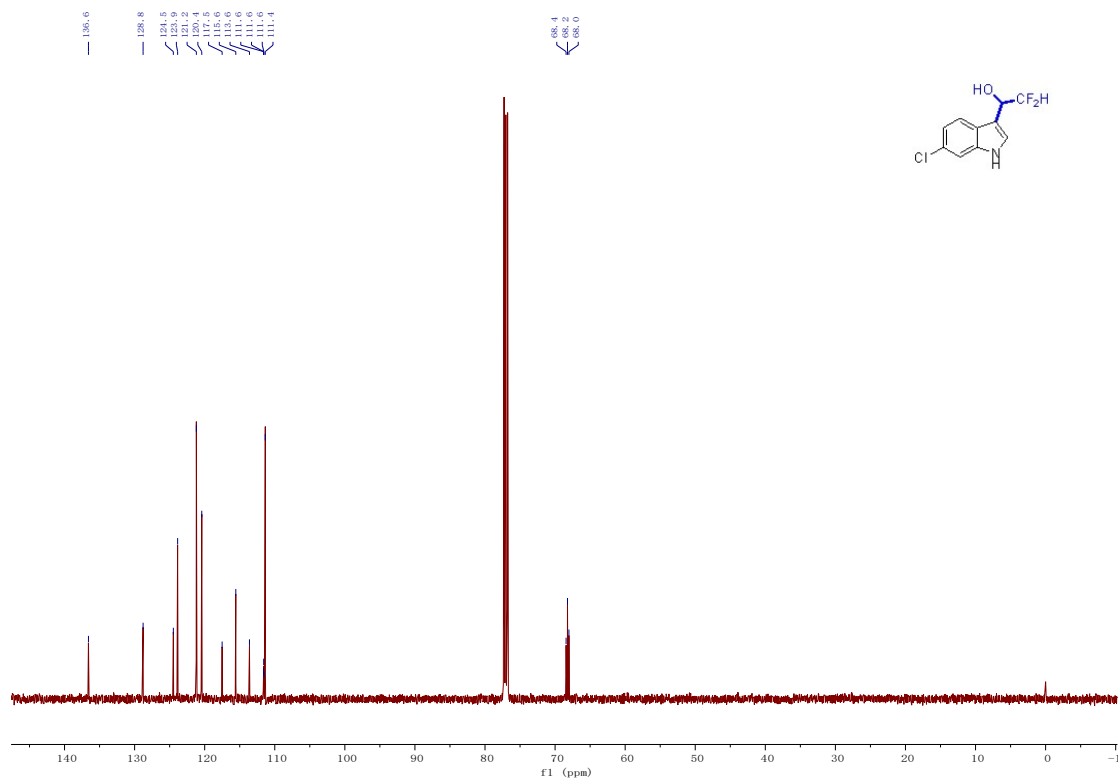

<sup>19</sup>F NMR (470 MHz, Chloroform-*d*) spectra of **3y**

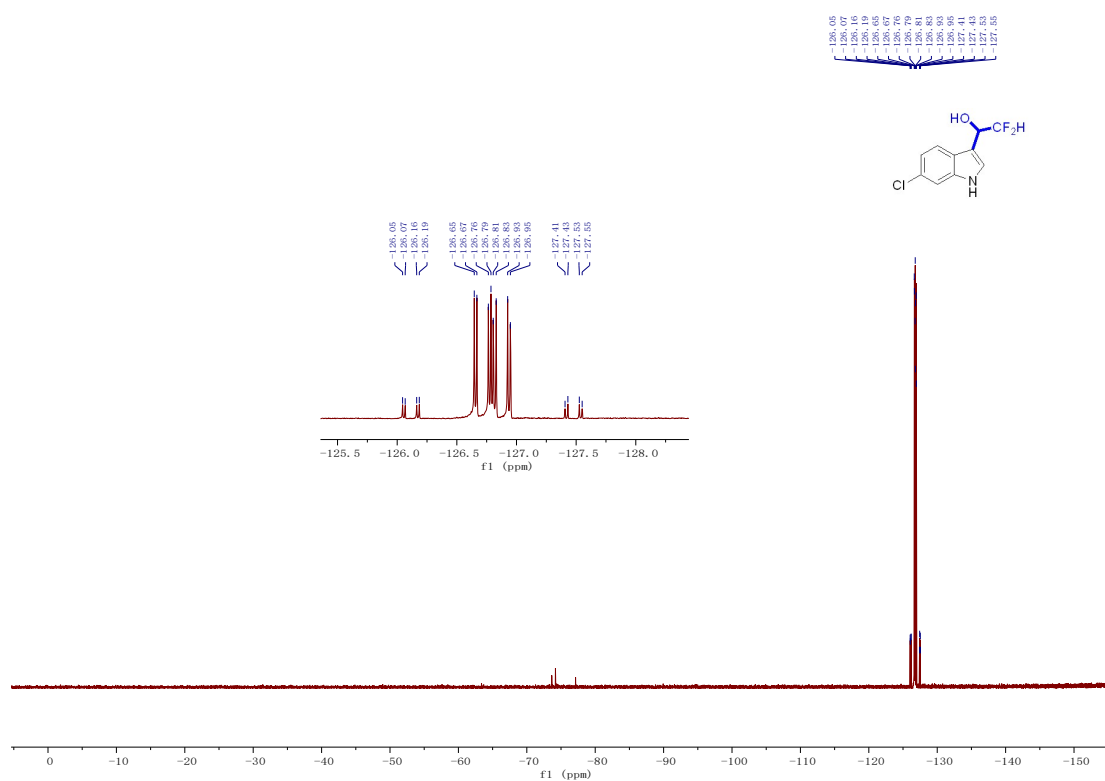

<sup>1</sup>H NMR (500 MHz, Chloroform-*d*) spectra of **3z**

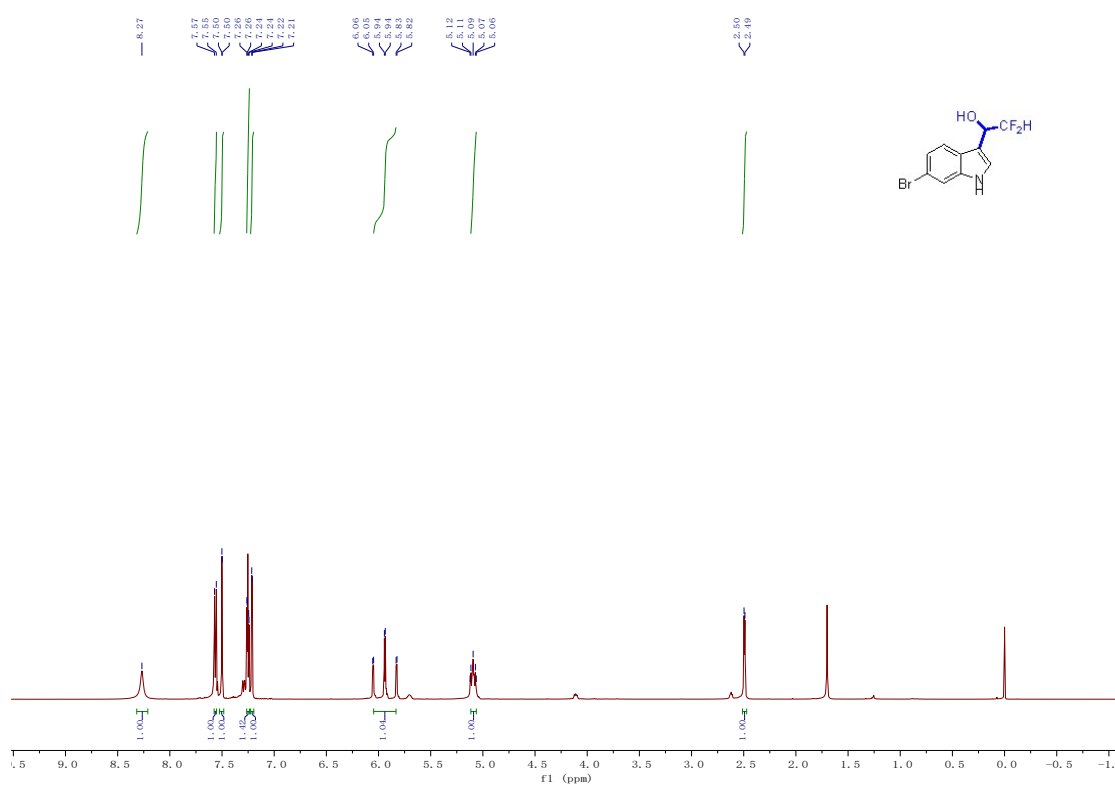

$^{13}\text{C}$  NMR (125 MHz, Chloroform-*d*) spectra of **3z**

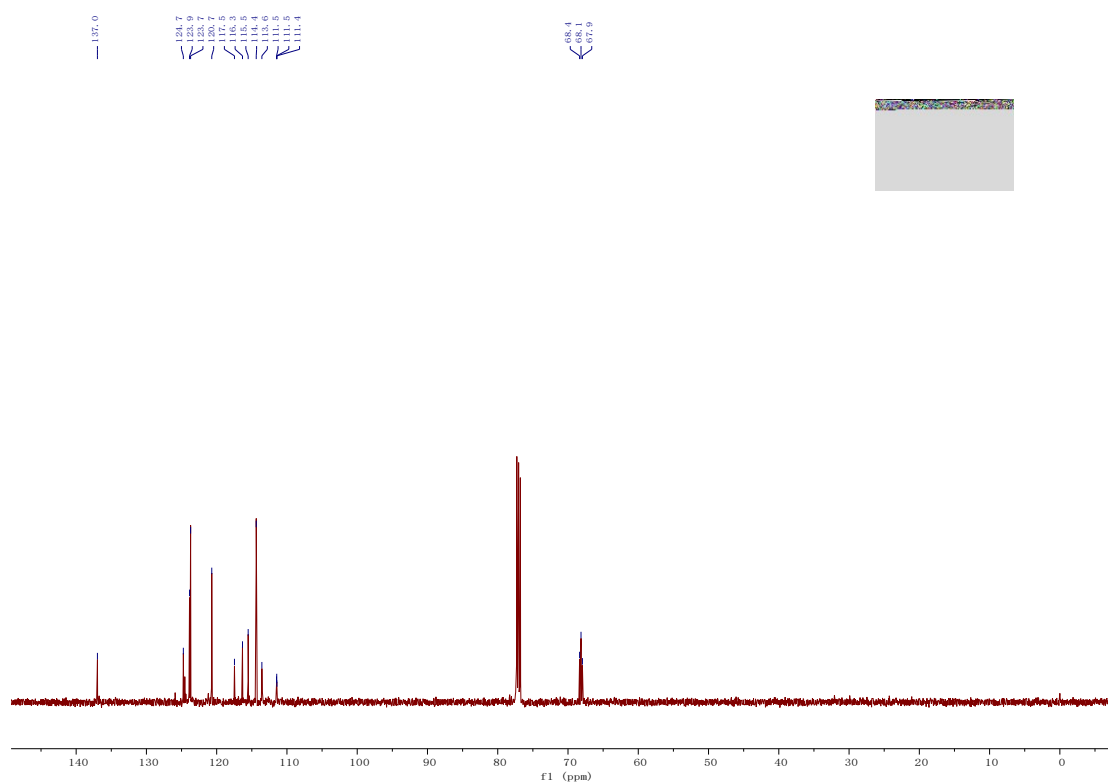

$^{19}\text{F}$  NMR (470 MHz, Chloroform-*d*) spectra of **3z**

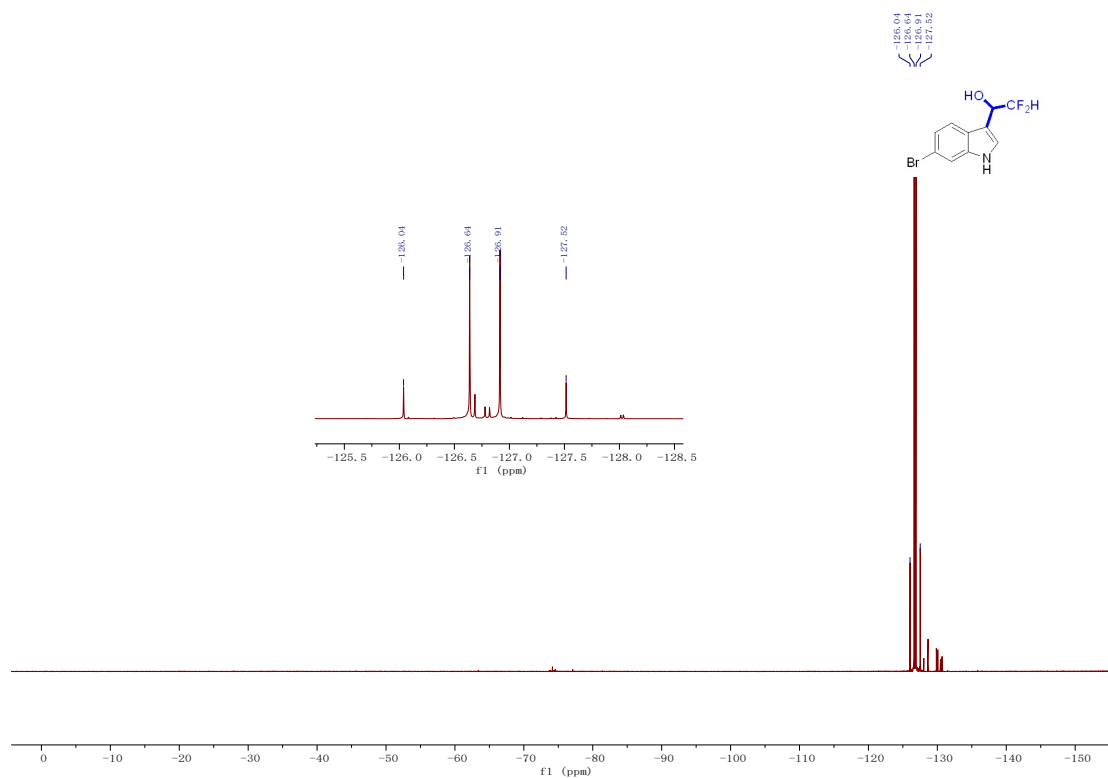



$^1\text{H}$  NMR (500 MHz, Chloroform-*d*) spectra of **3a'**

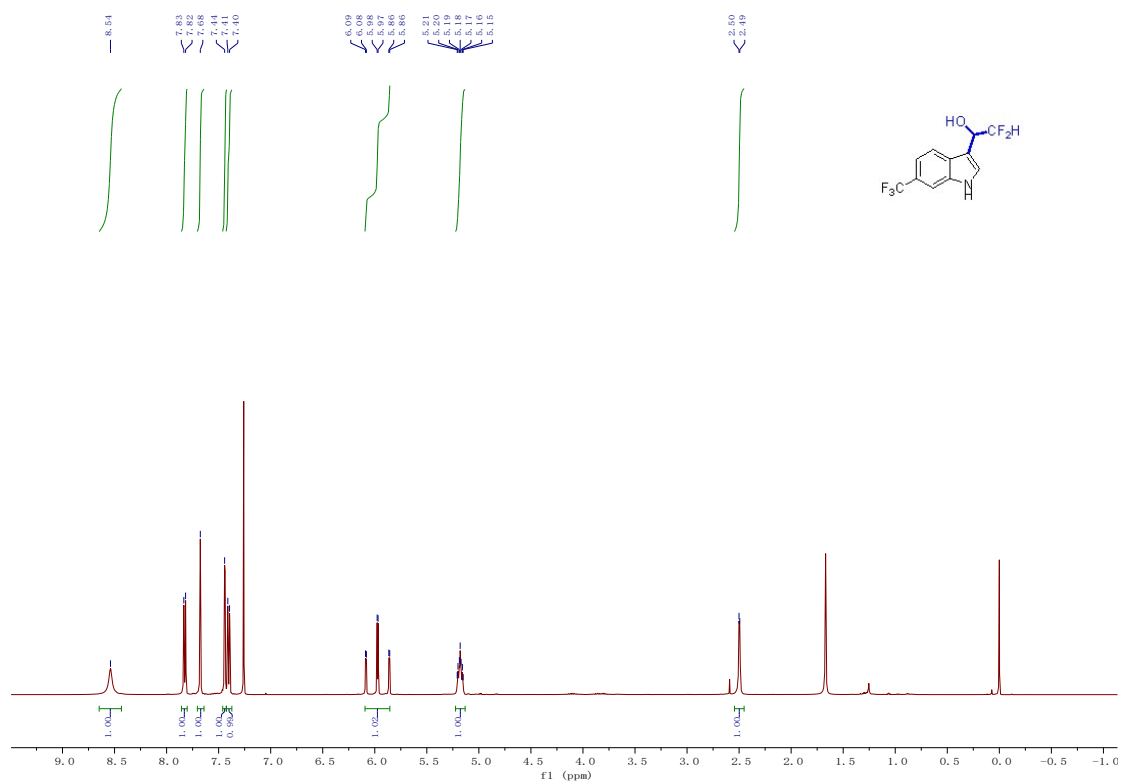

$^{13}\text{C}$  NMR (125 MHz, Chloroform-*d*) spectra of **3a'**

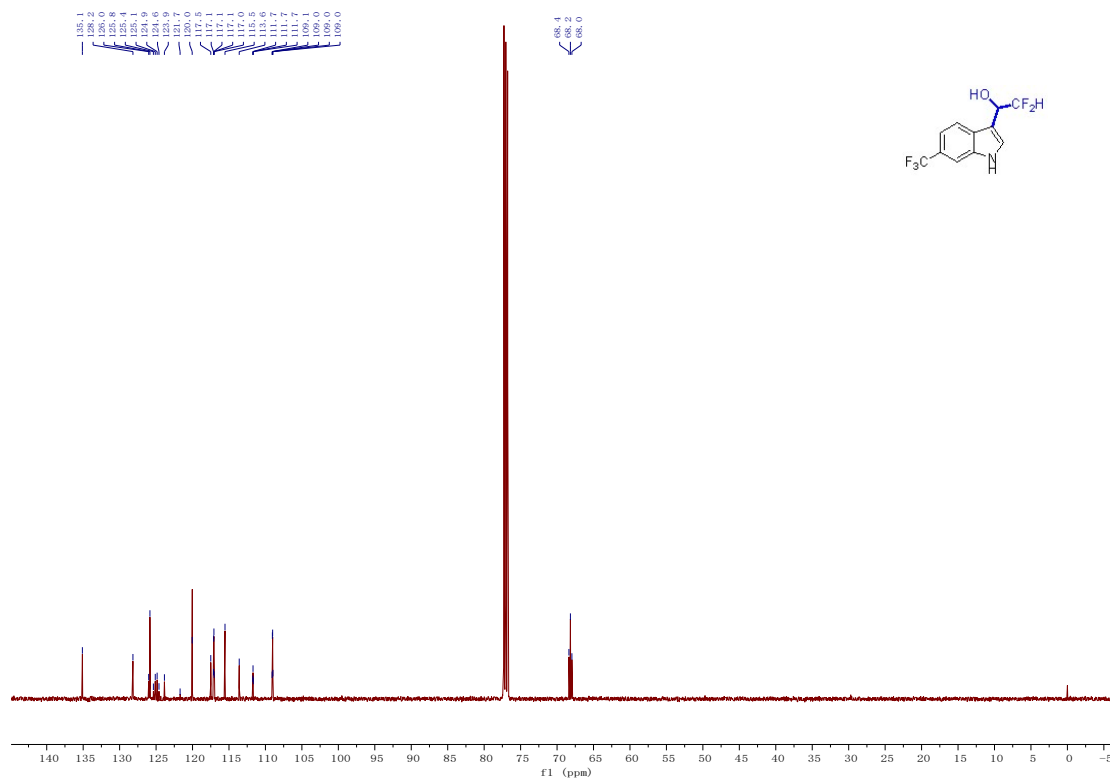

$^{19}\text{F}$  NMR (470 MHz, Chloroform- $d$ ) spectra of **3a'**

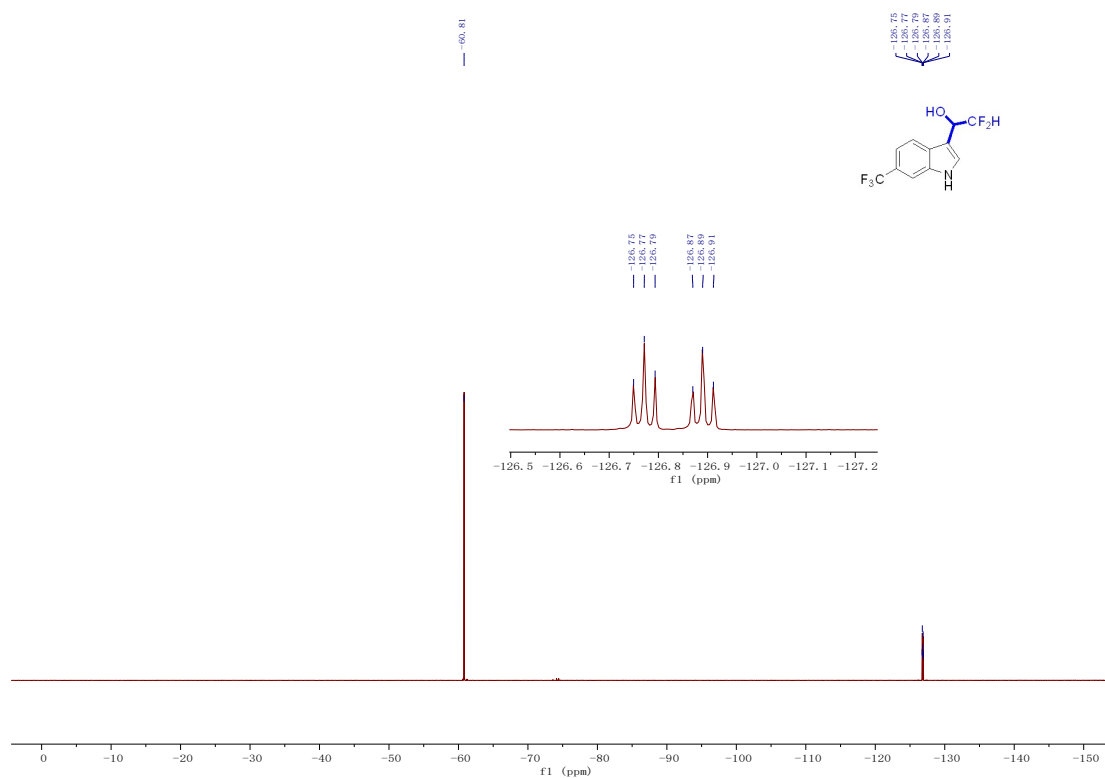

$^1\text{H}$  NMR (500 MHz, Methanol- $d_4$ ) spectra of **3b'**

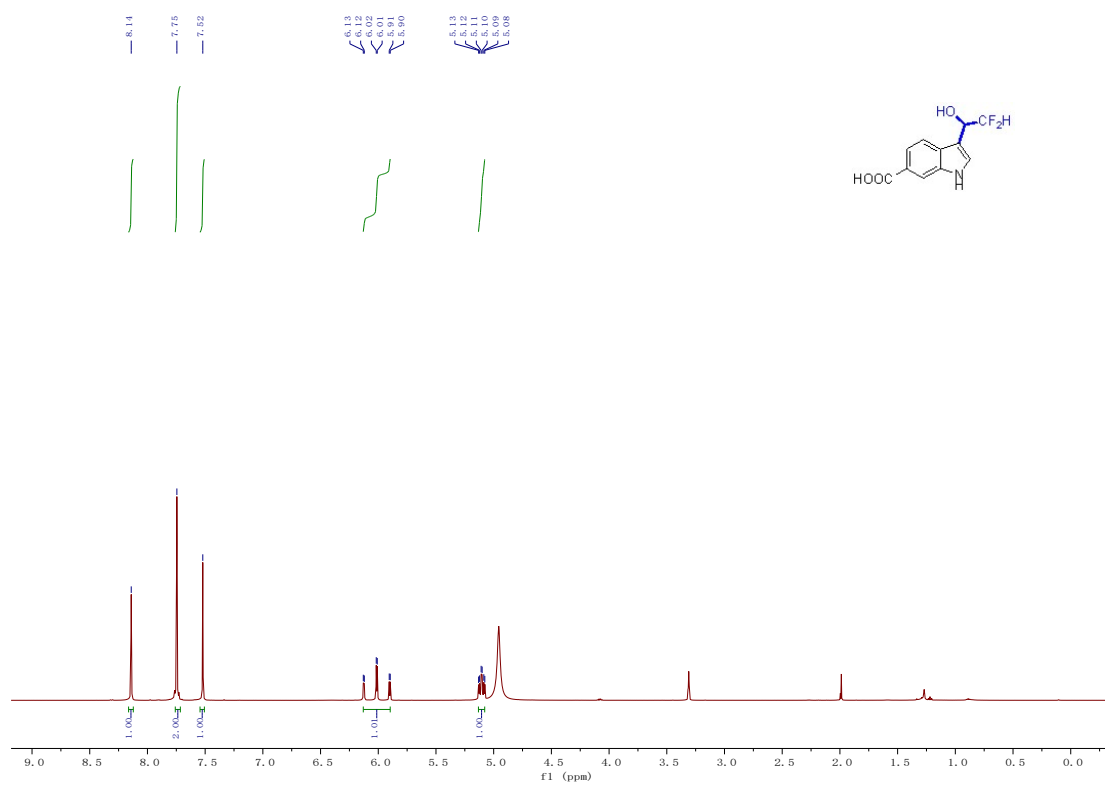

$^{13}\text{C}$  NMR (125 MHz, Methanol- $d_4$ ) spectra of **3b'**

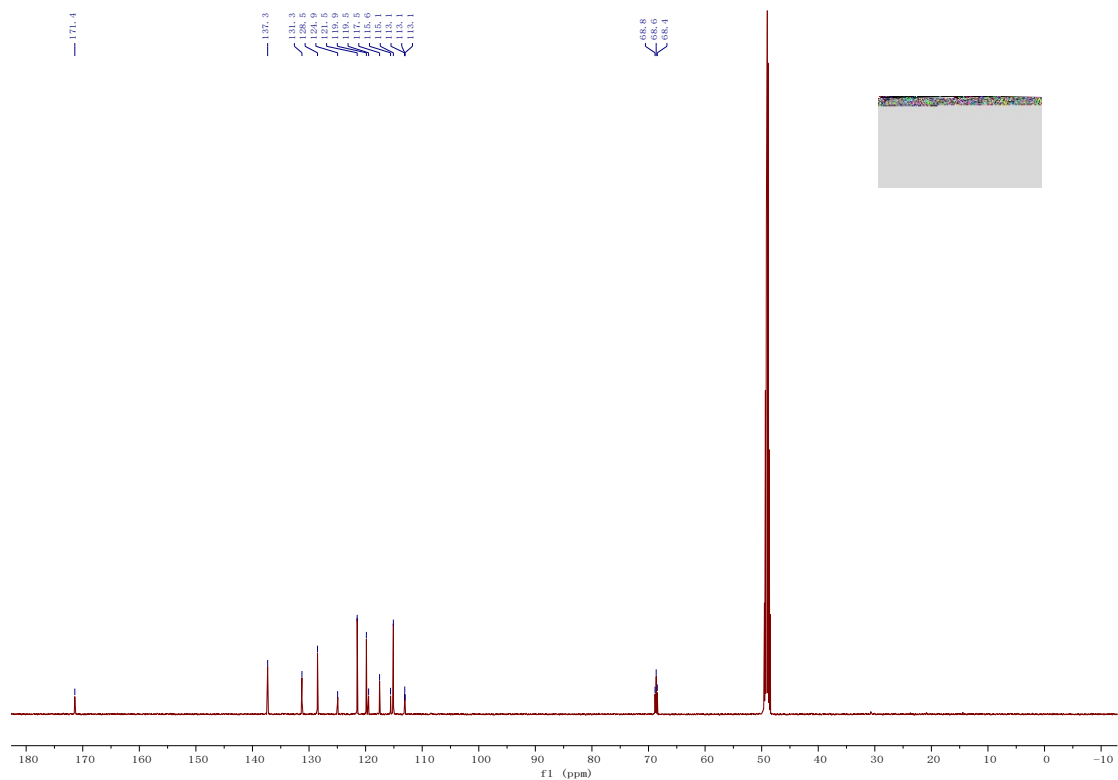

$^{19}\text{F}$  NMR (470 MHz, Methanol- $d_4$ ) spectra of **3b'**

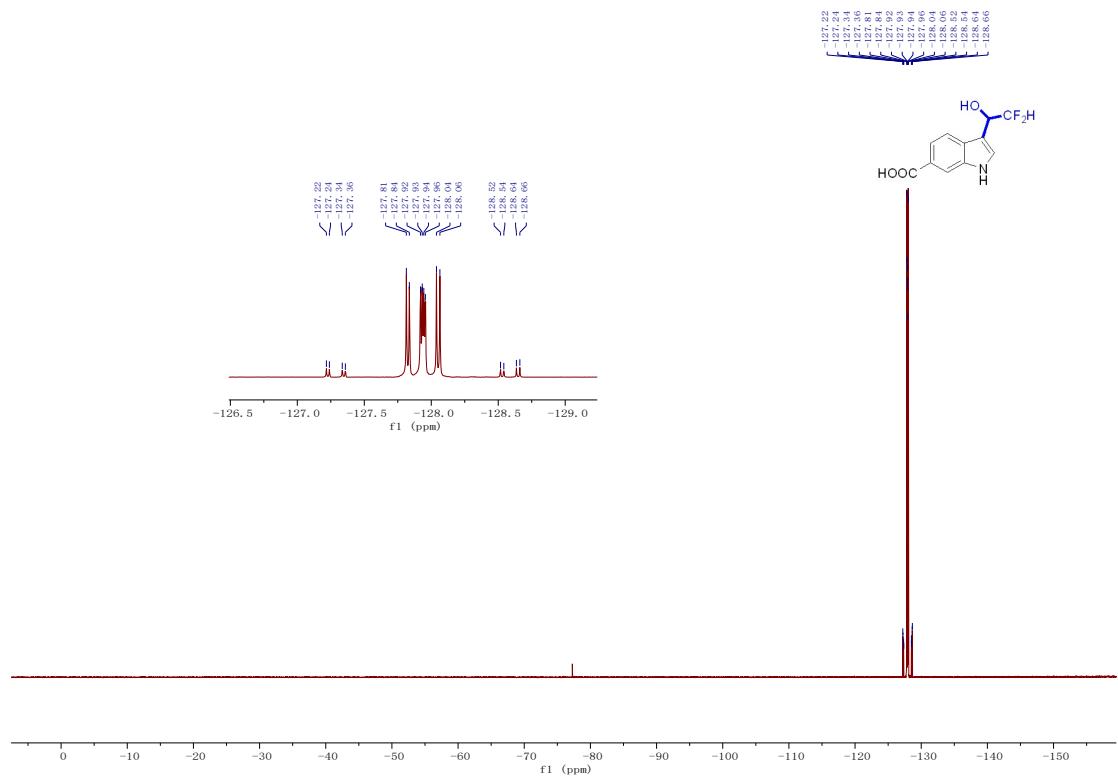

$^1\text{H}$  NMR (500 MHz, Methanol- $d_4$ ) spectra of **3c'**

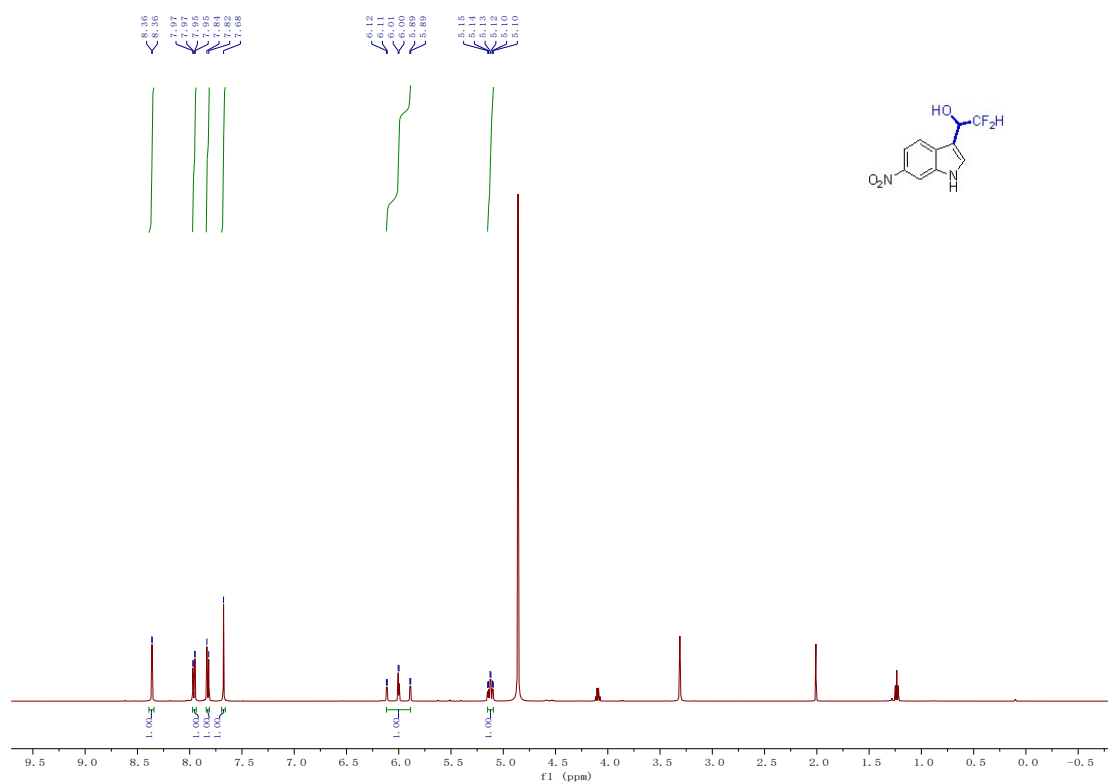

$^{13}\text{C}$  NMR (125 MHz, Methanol- $d_4$ ) spectra of **3c'**

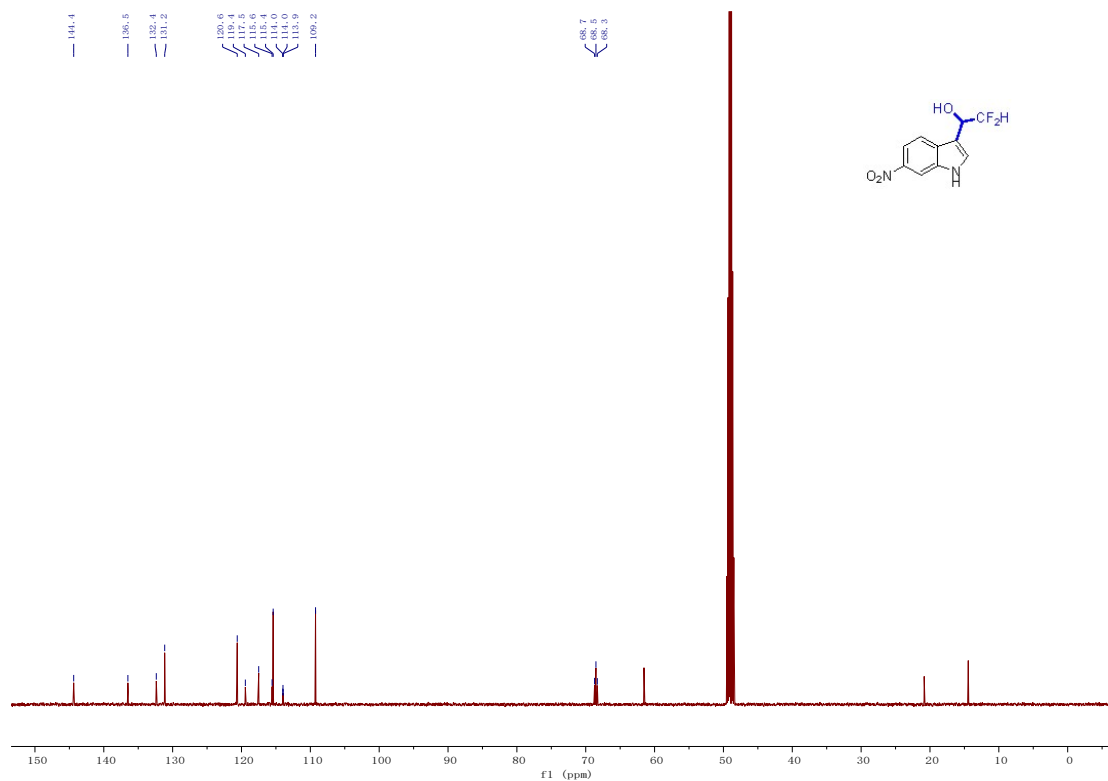

$^{19}\text{F}$  NMR (470 MHz, Methanol- $d_4$ ) spectra of **3c'**

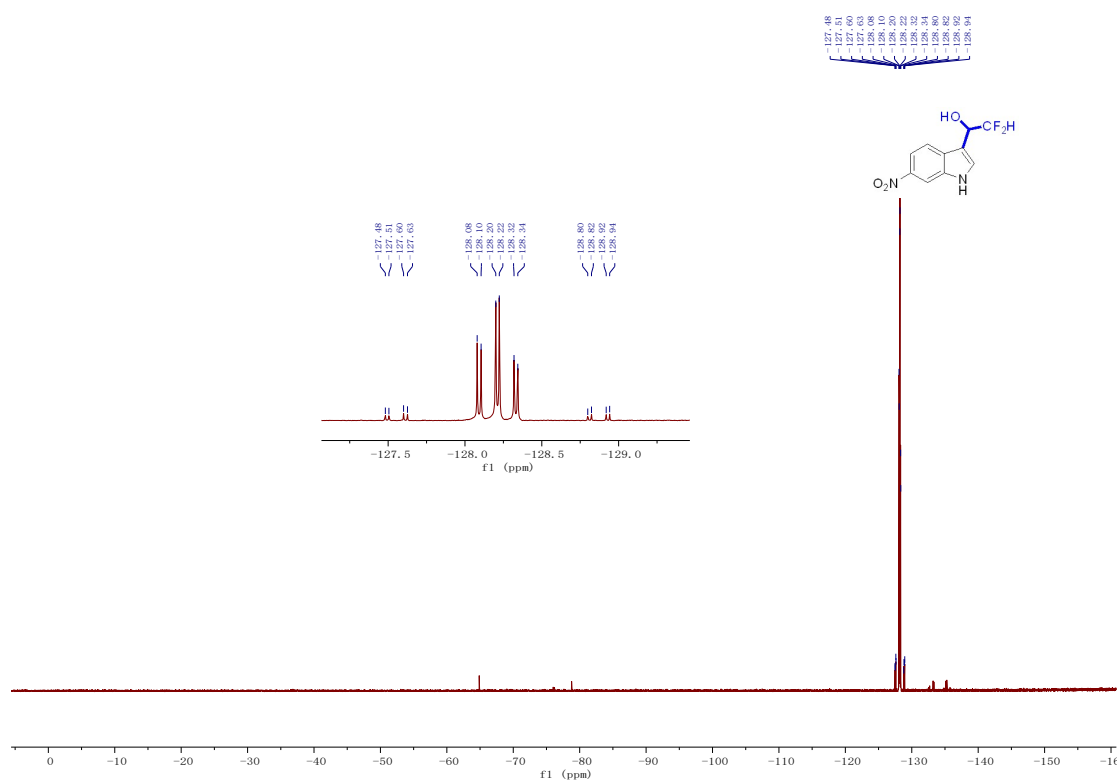

$^1\text{H}$  NMR (500 MHz, Methanol- $d_4$ ) spectra of **3d'**

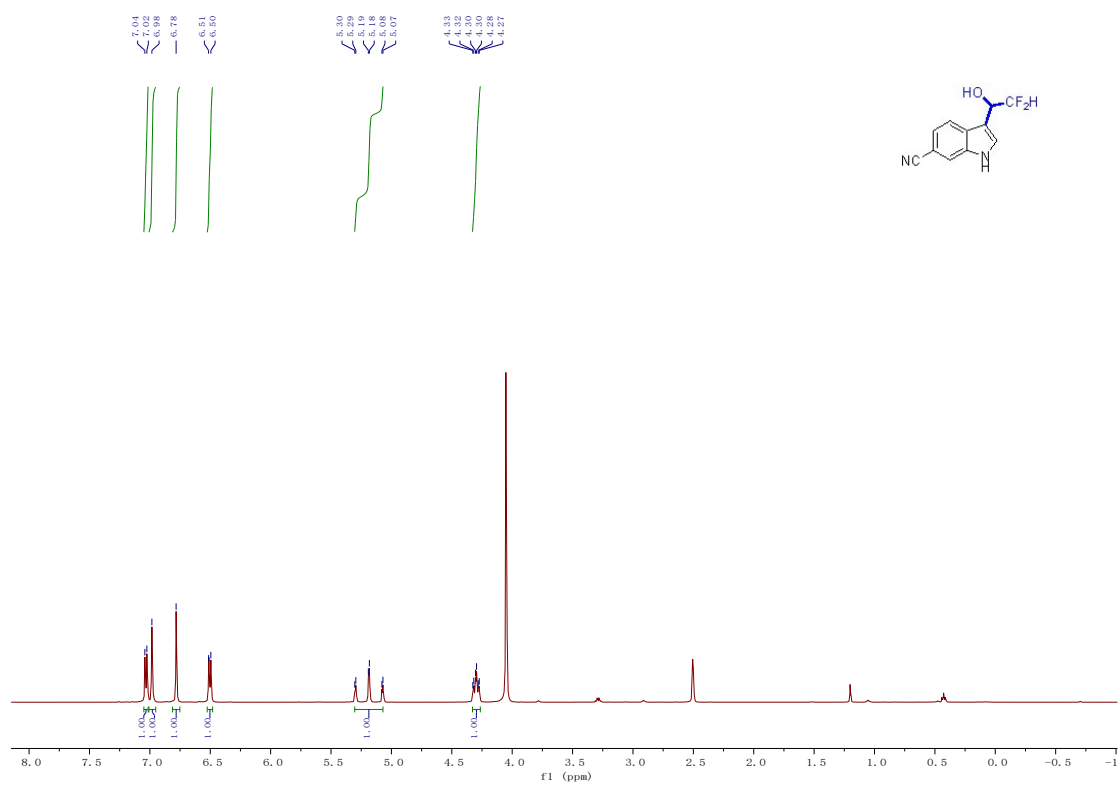

$^{13}\text{C}$  NMR (125 MHz, Methanol- $d_4$ ) spectra of **3d**'

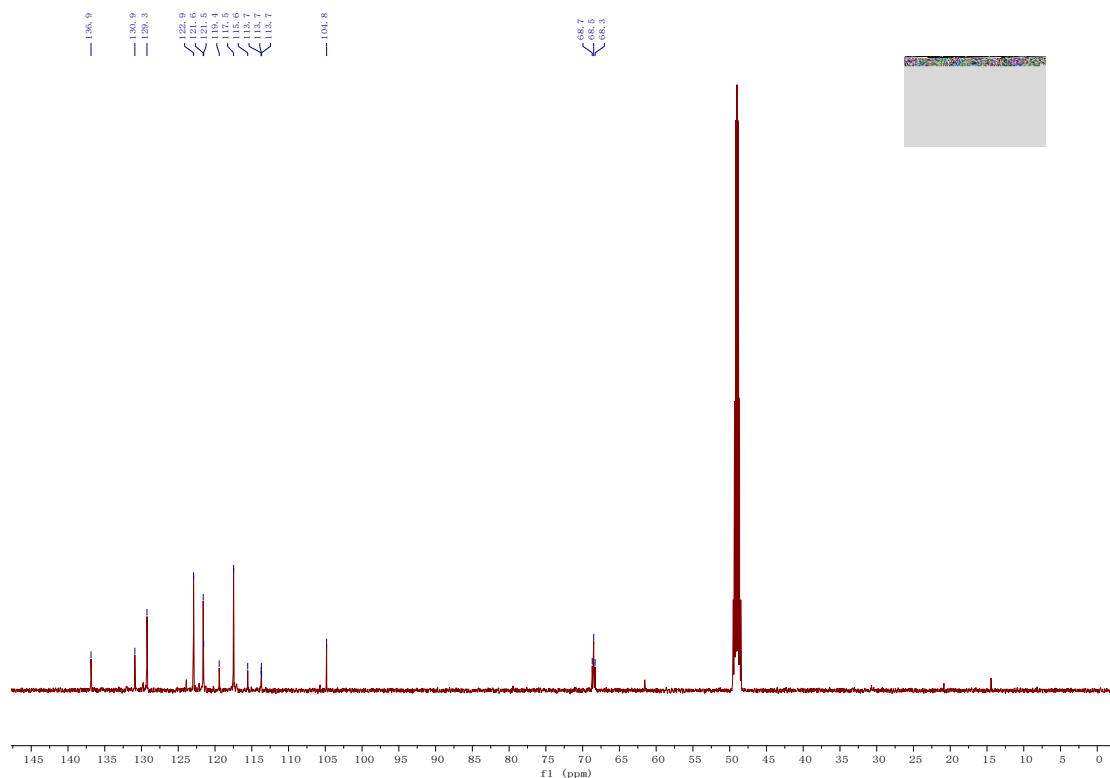

$^{19}\text{F}$  NMR (470 MHz, Methanol- $d_4$ ) spectra of **3d**'

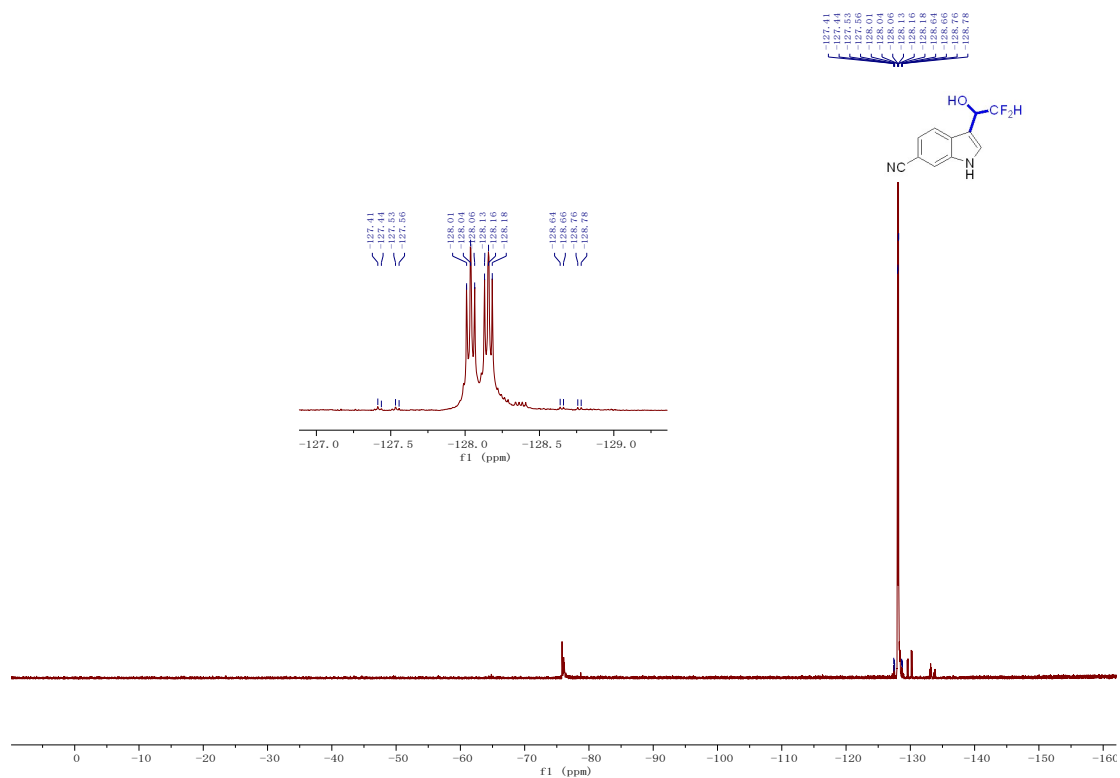

<sup>1</sup>H NMR (500 MHz, Chloroform-*d*) spectra of **3e'**

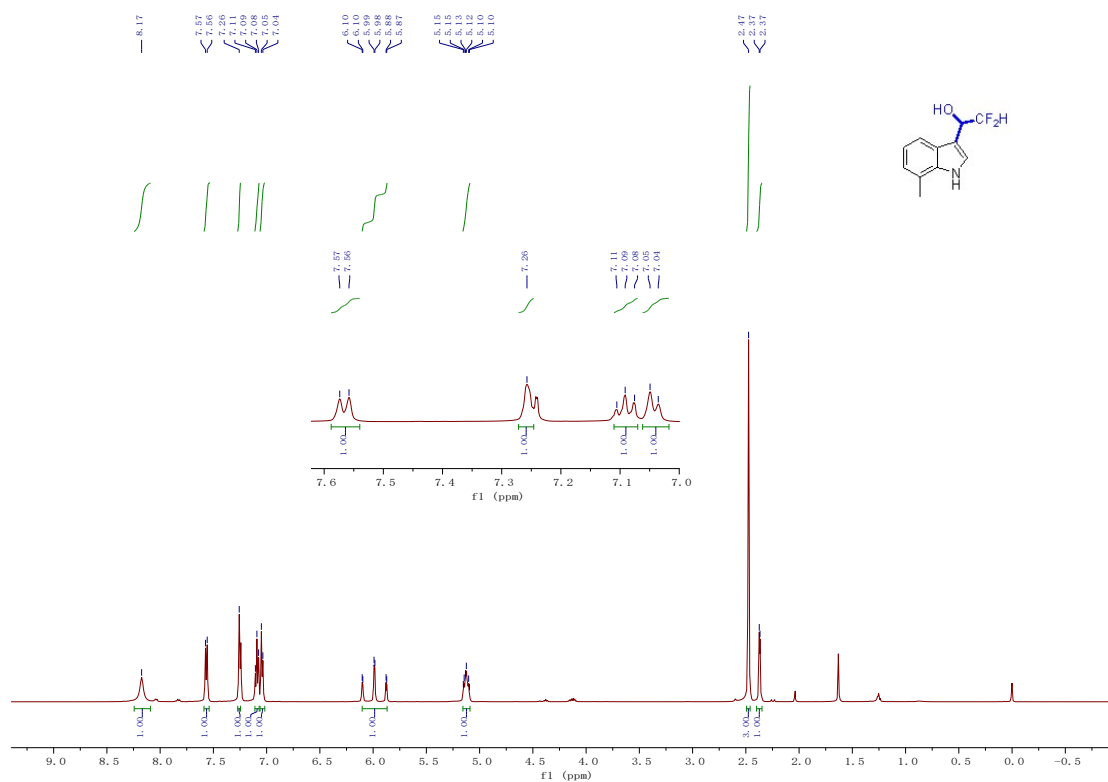

<sup>13</sup>C NMR (125 MHz, Chloroform-*d*) spectra of **3e'**

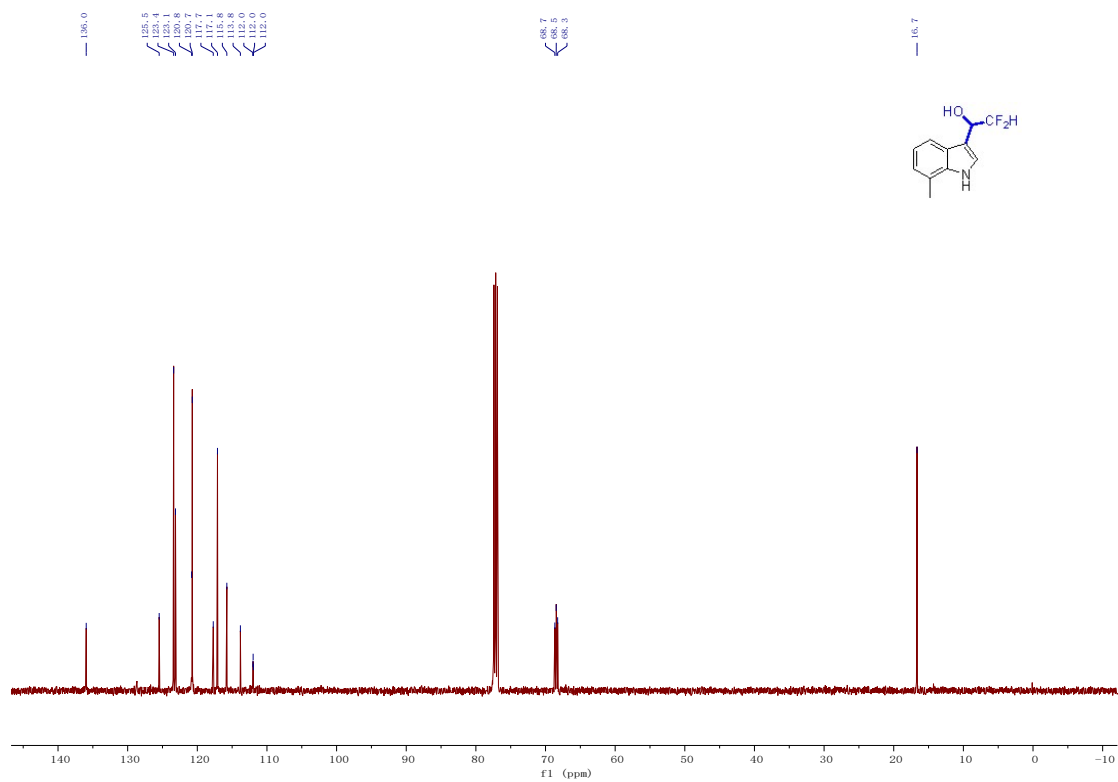

$^{19}\text{F}$  NMR (470 MHz, Chloroform-*d*) spectra of **3e'**

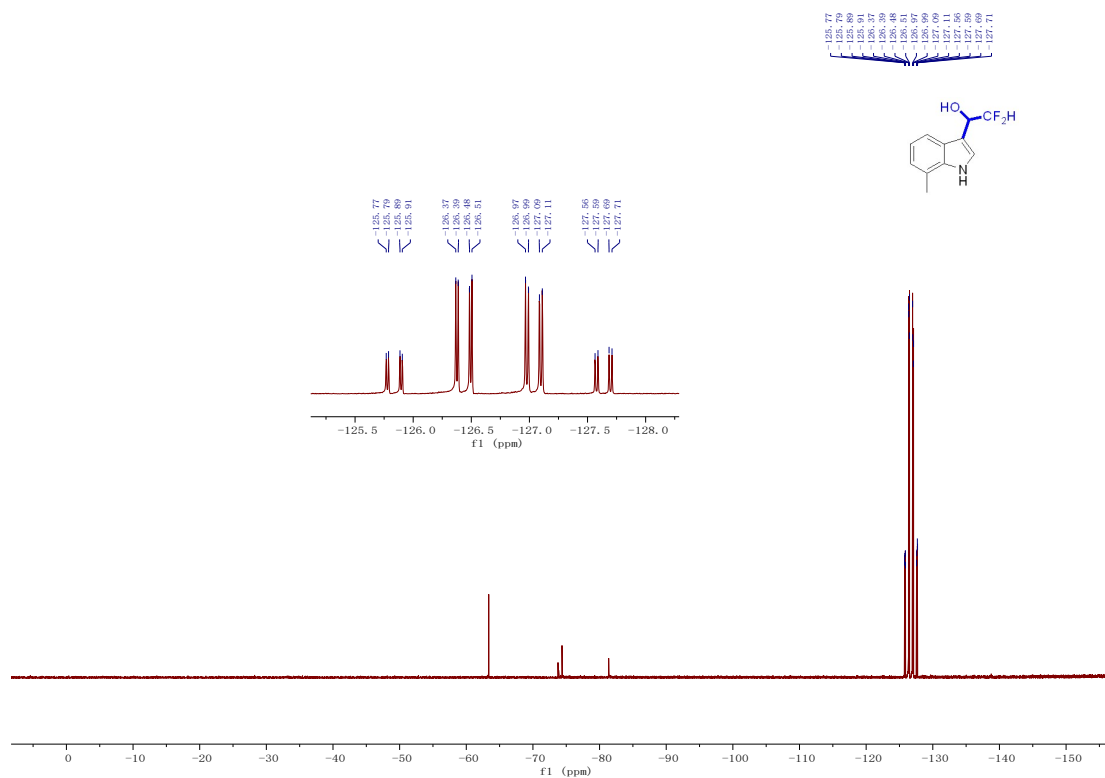

$^1\text{H}$  NMR (500 MHz, Chloroform-*d*) spectra of **3f'**

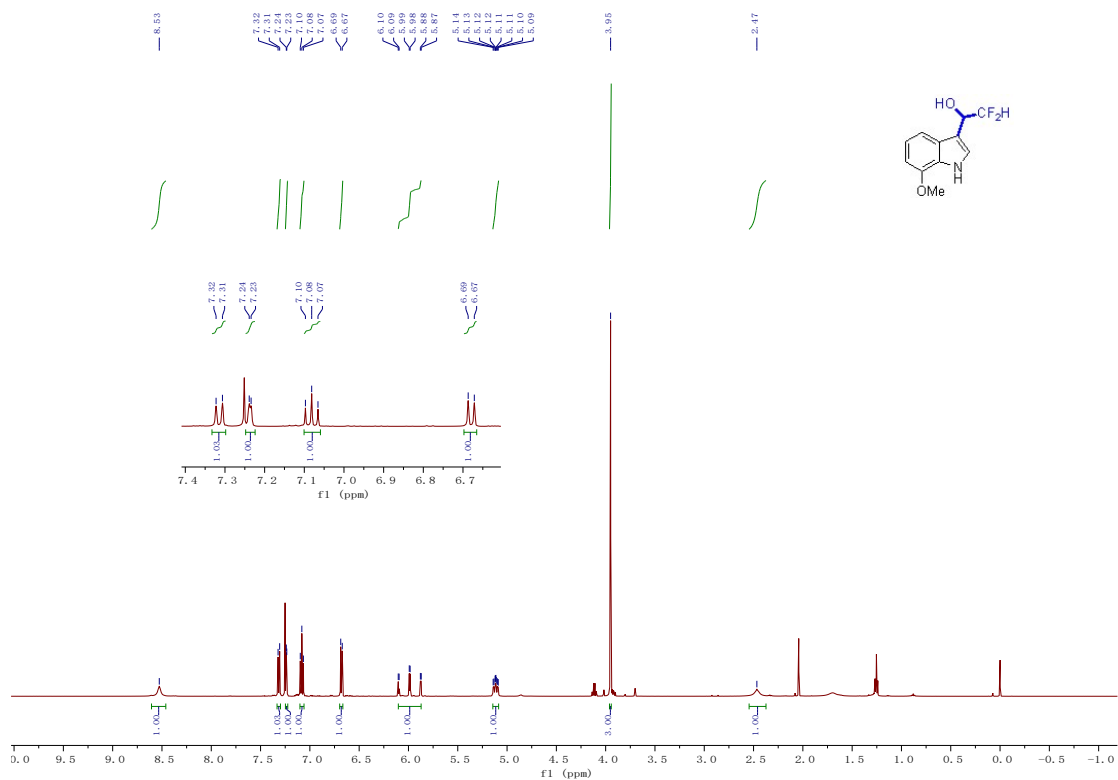



$^{13}\text{C}$  NMR (125 MHz, Chloroform-*d*) spectra of **3f**

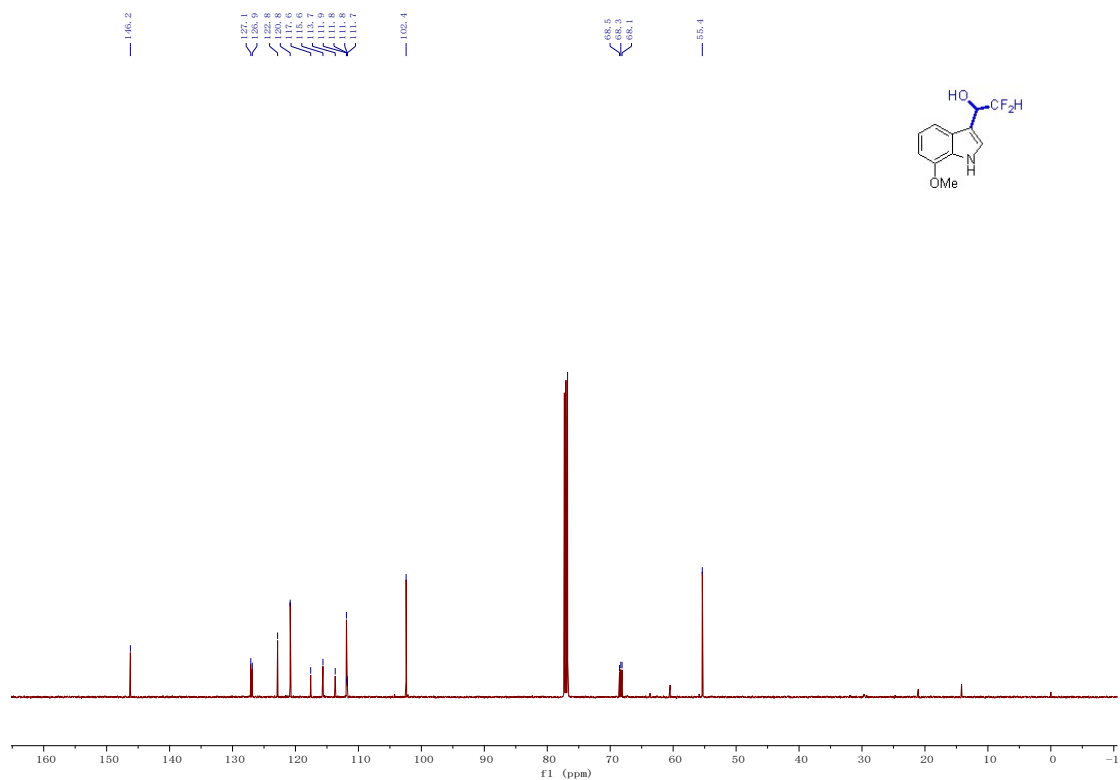

$^{19}\text{F}$  NMR (470 MHz, Chloroform-*d*) spectra of **3f**

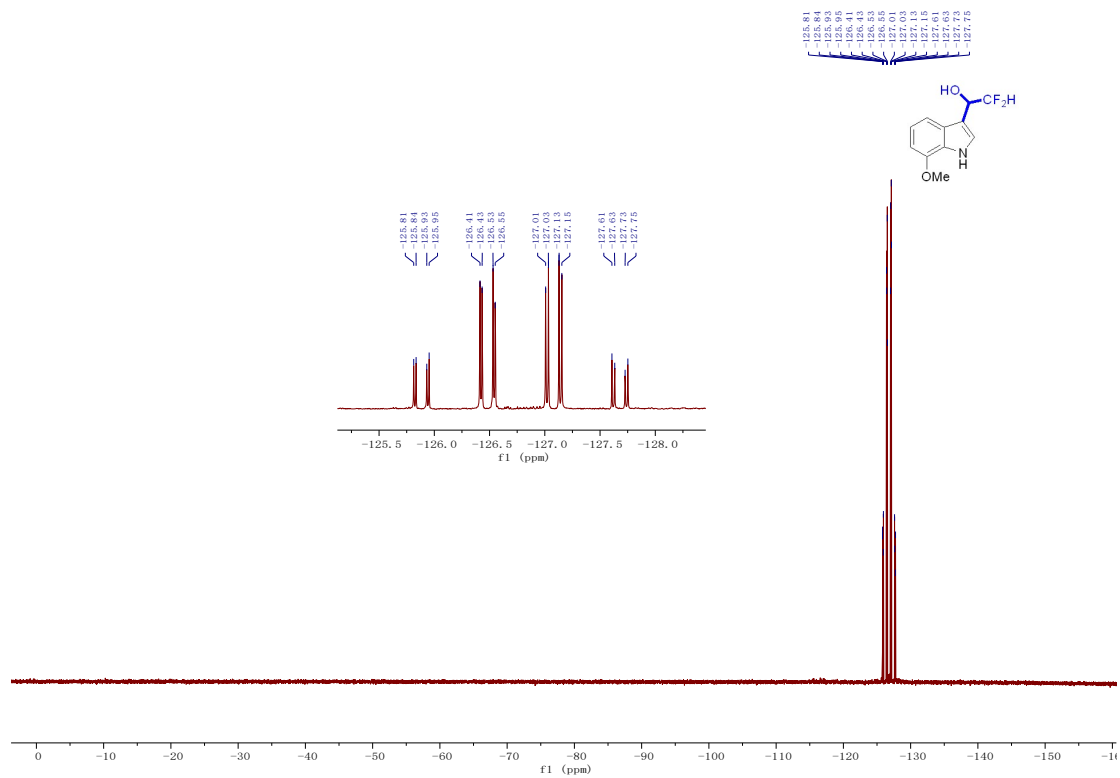

$^1\text{H}$  NMR (500 MHz, Chloroform-*d*) spectra of **3g'**

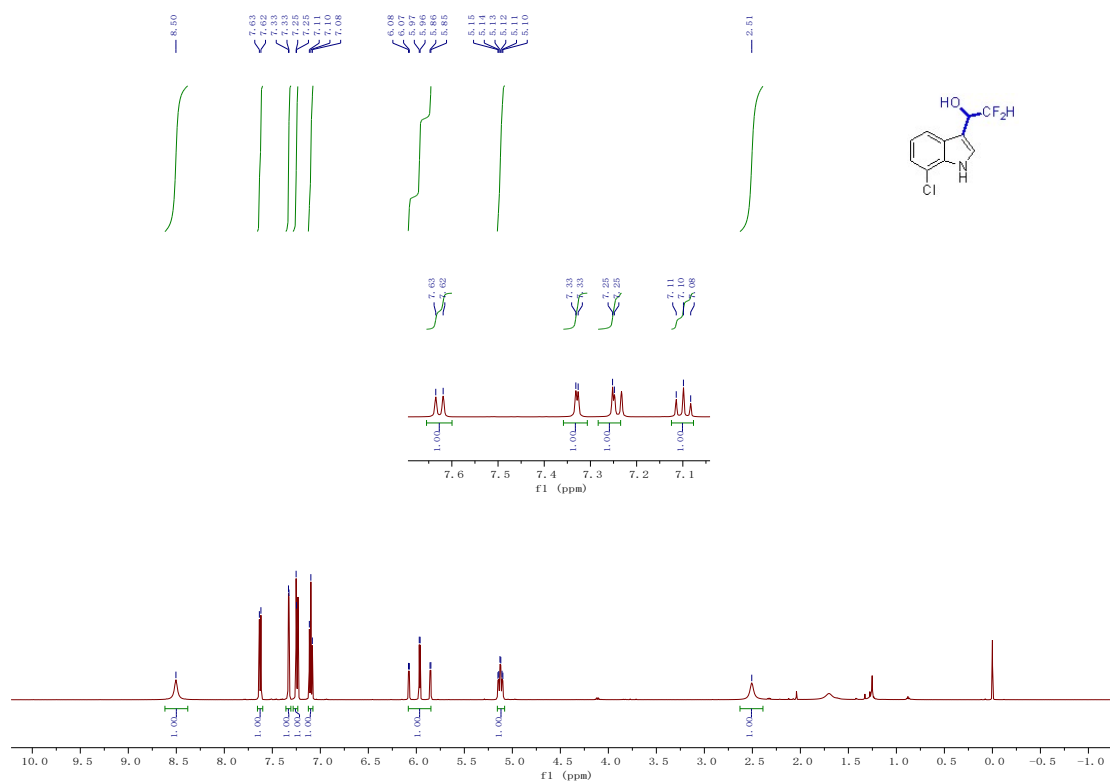

$^{13}\text{C}$  NMR (125 MHz, Chloroform-*d*) spectra of **3g'**

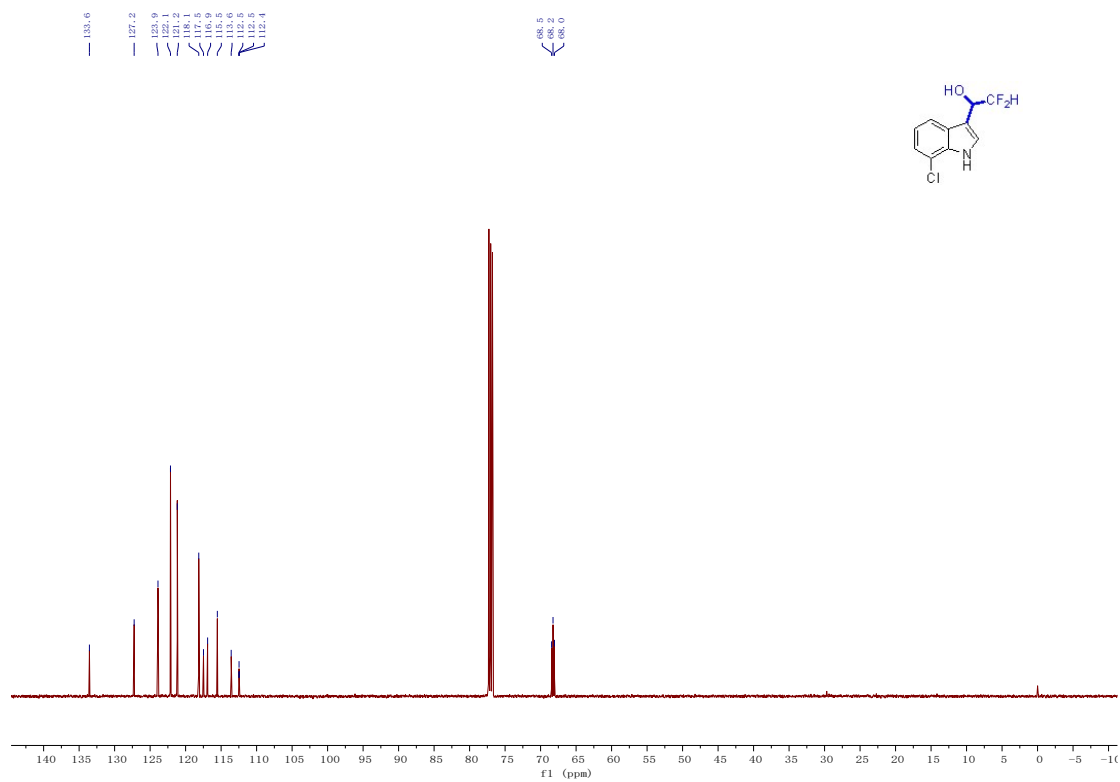

<sup>19</sup>F NMR (470 MHz, Chloroform-*d*) spectra of **3g'**

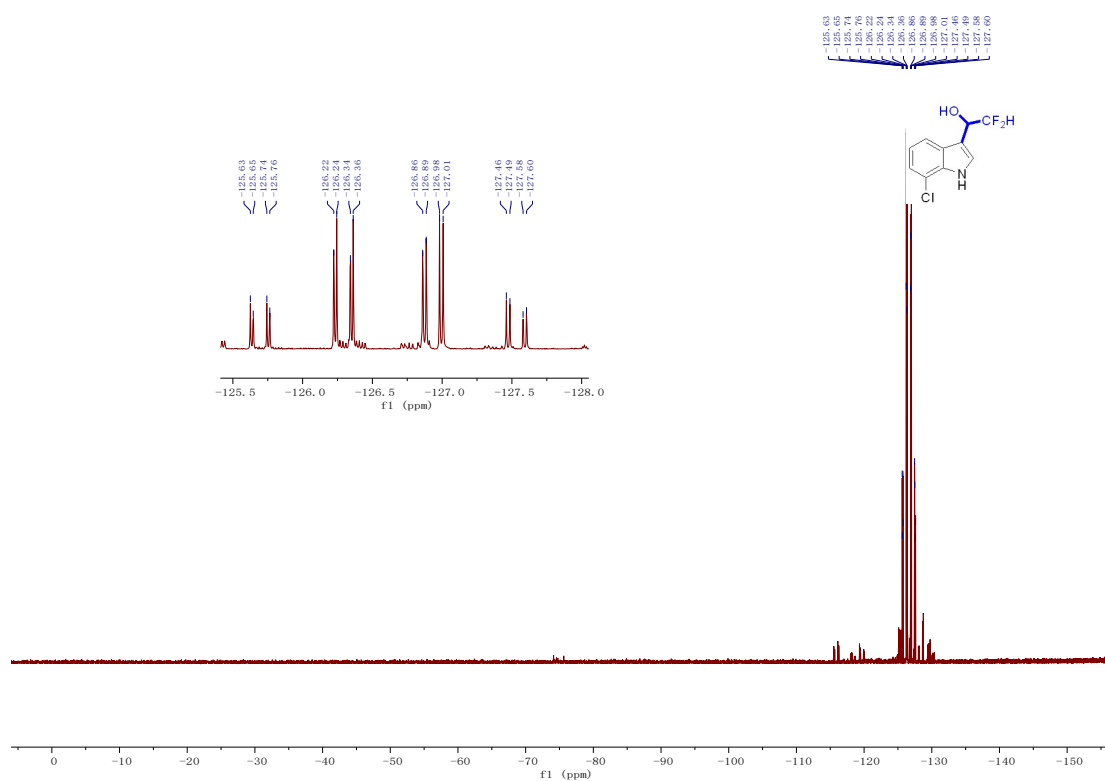

<sup>1</sup>H NMR (500 MHz, Chloroform-*d*) spectra of **3h'**

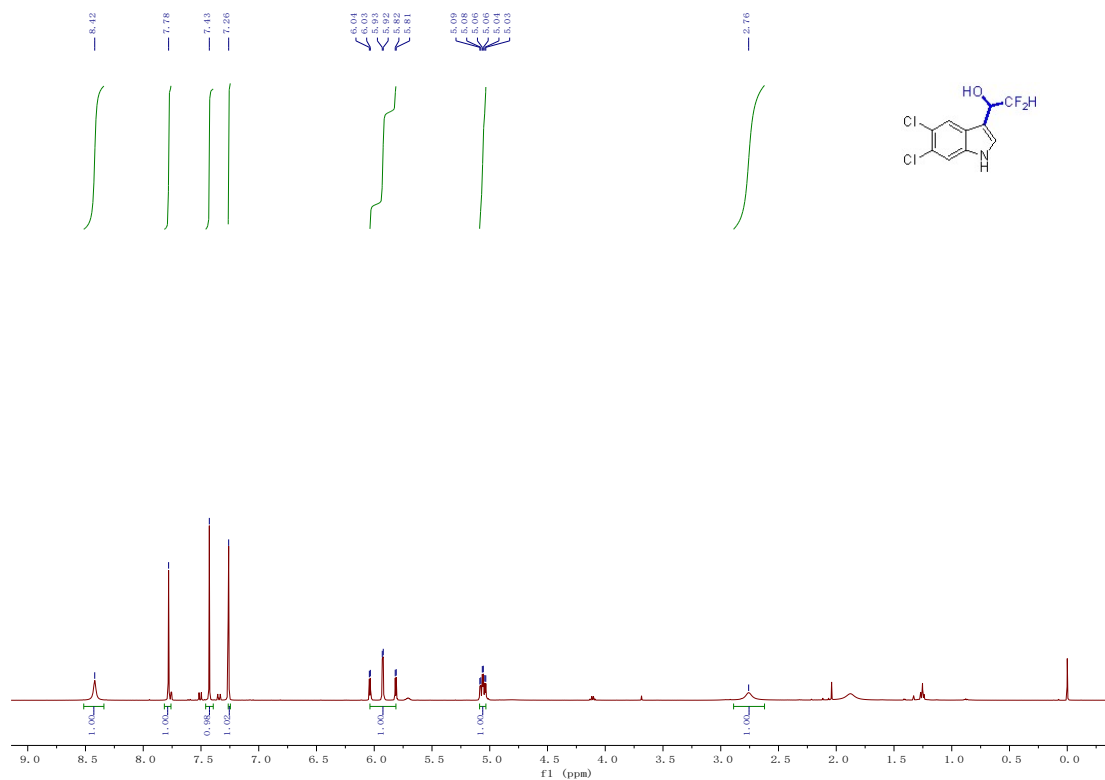

$^{13}\text{C}$  NMR (125 MHz, Chloroform-*d*) spectra of **3h'**

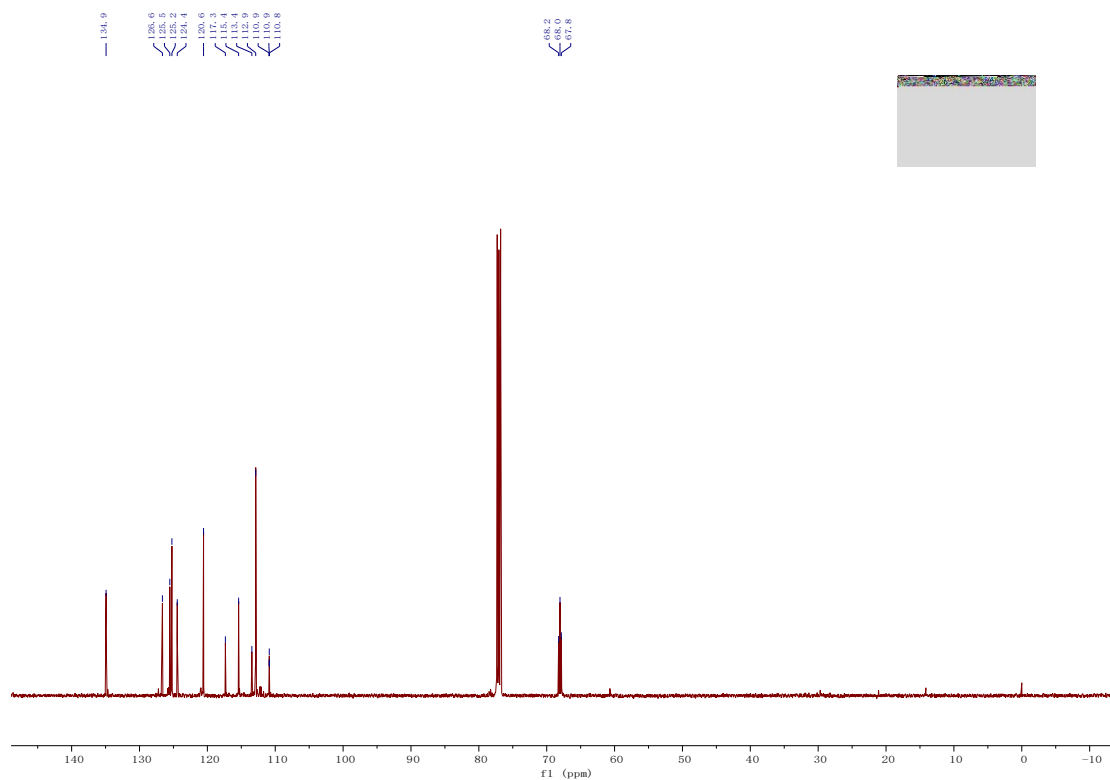

$^{19}\text{F}$  NMR (470 MHz, Chloroform-*d*) spectra of **3h'**

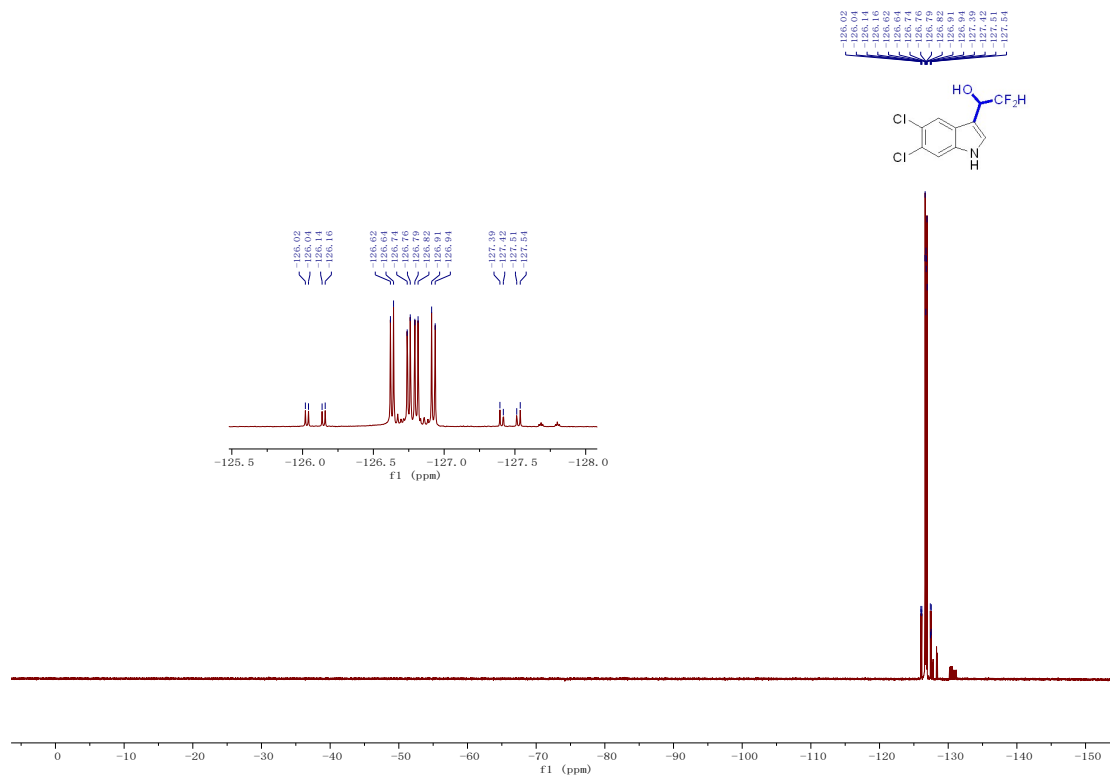

$^1\text{H}$  NMR (500 MHz, Methanol- $d_4$ ) spectra of **3i'**

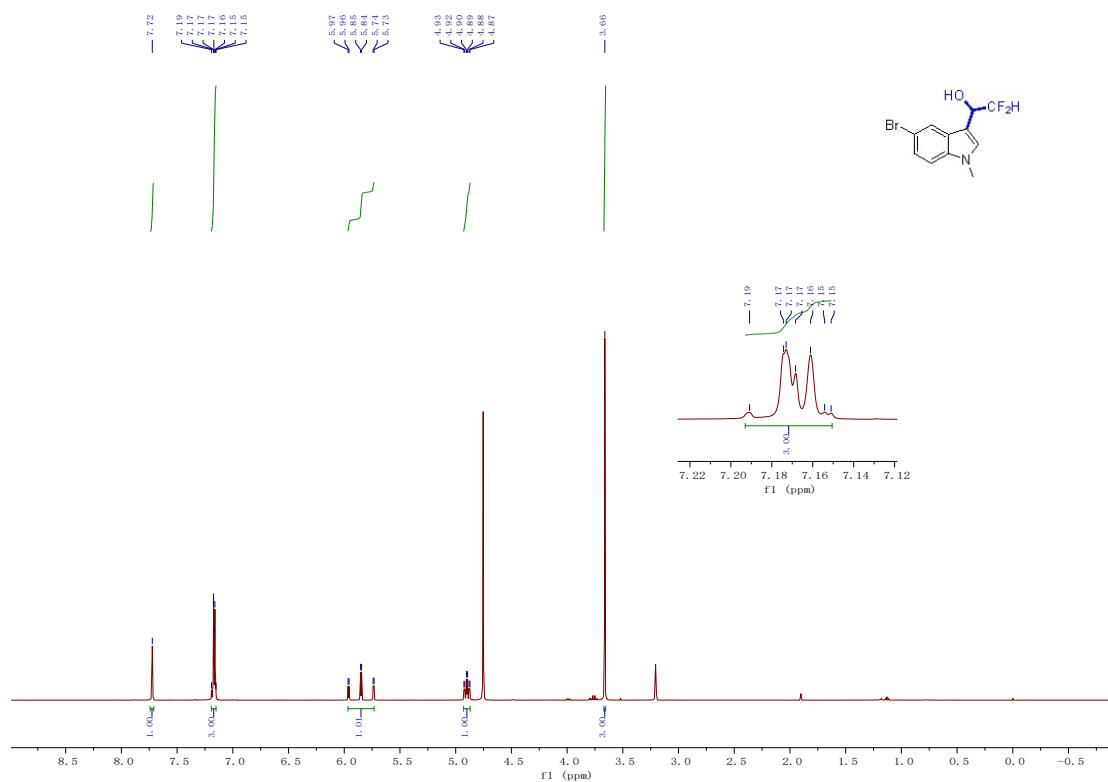

$^{13}\text{C}$  NMR (125 MHz, Methanol- $d_4$ ) spectra of **3i'**

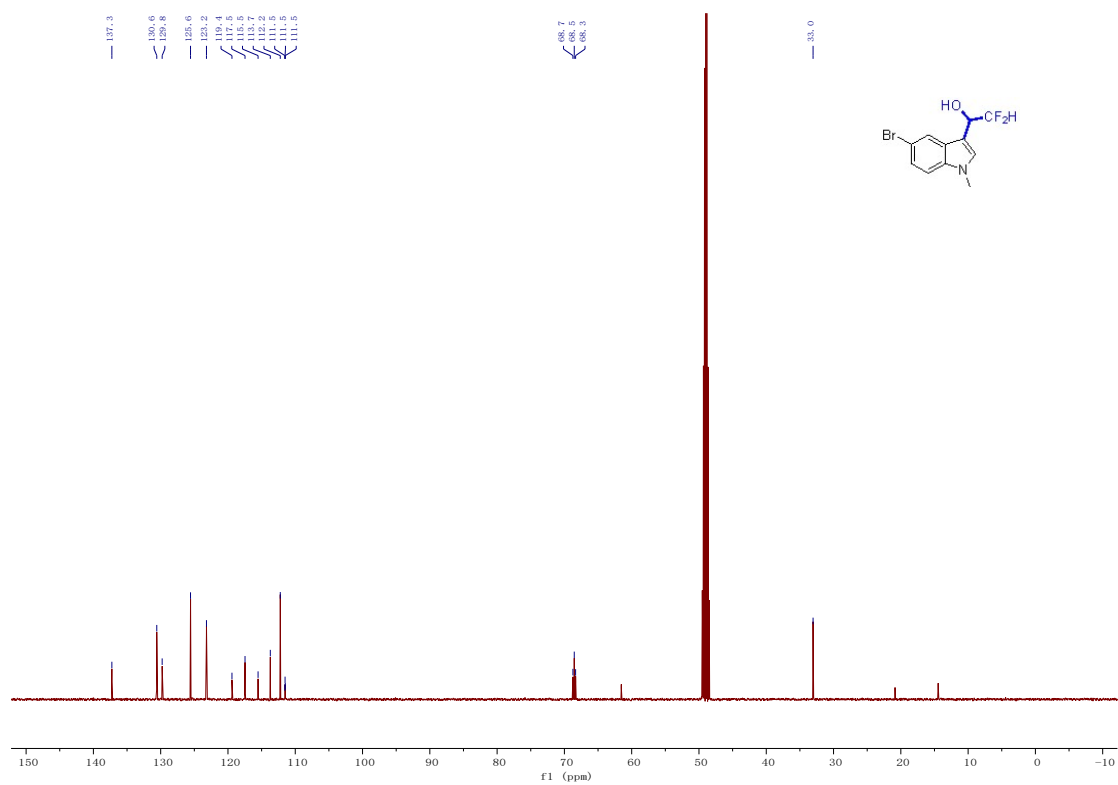

$^{19}\text{F}$  NMR (470 MHz, Methanol- $d_4$ ) spectra of **3i'**

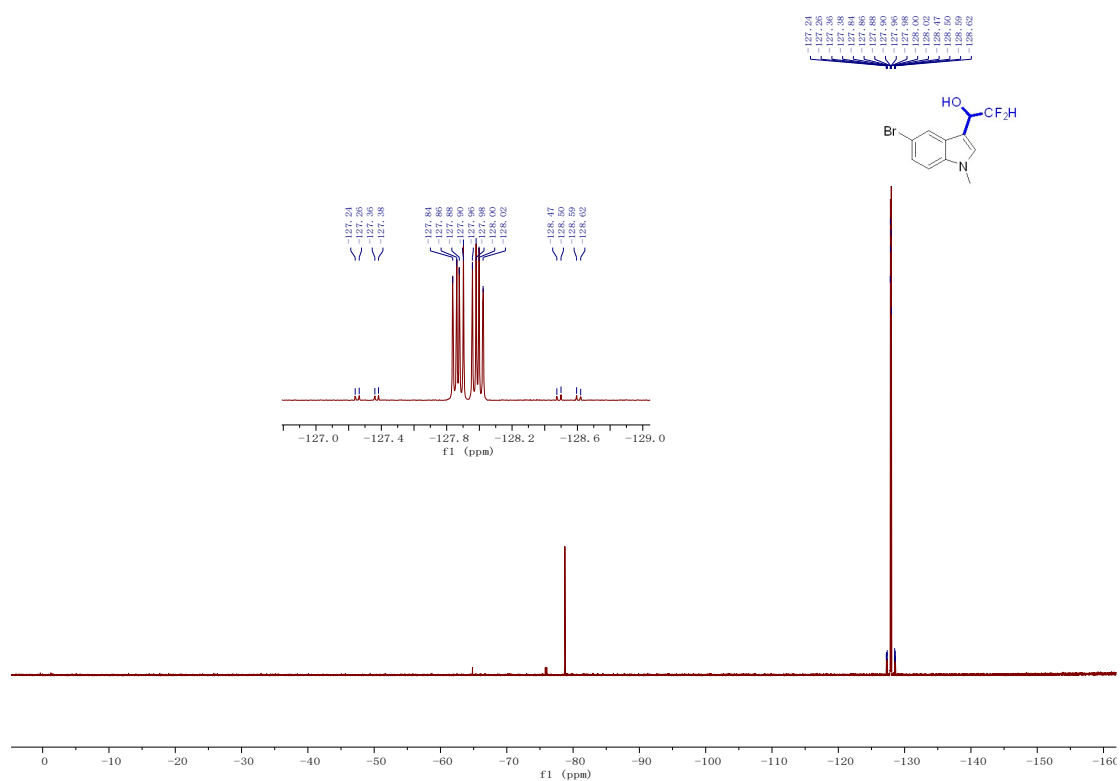

$^1\text{H}$  NMR (500 MHz, Chloroform- $d$ ) spectra of **3j'**

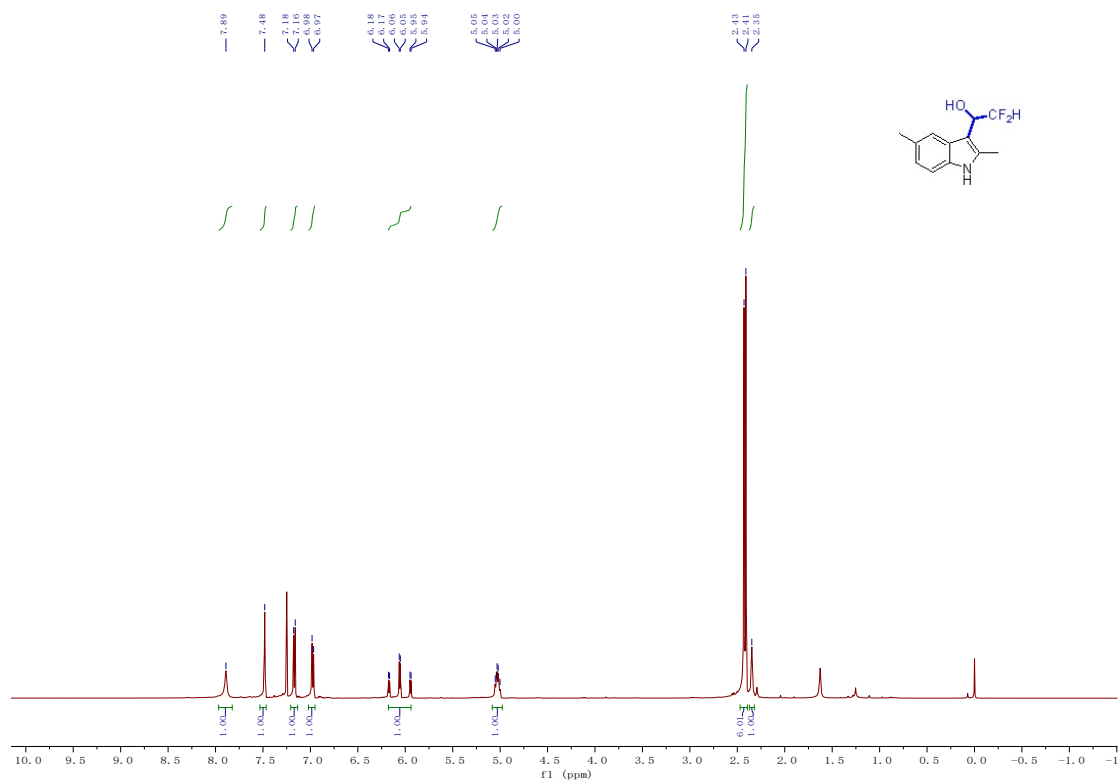

$^{13}\text{C}$  NMR (125 MHz, Chloroform-*d*) spectra of **3j'**

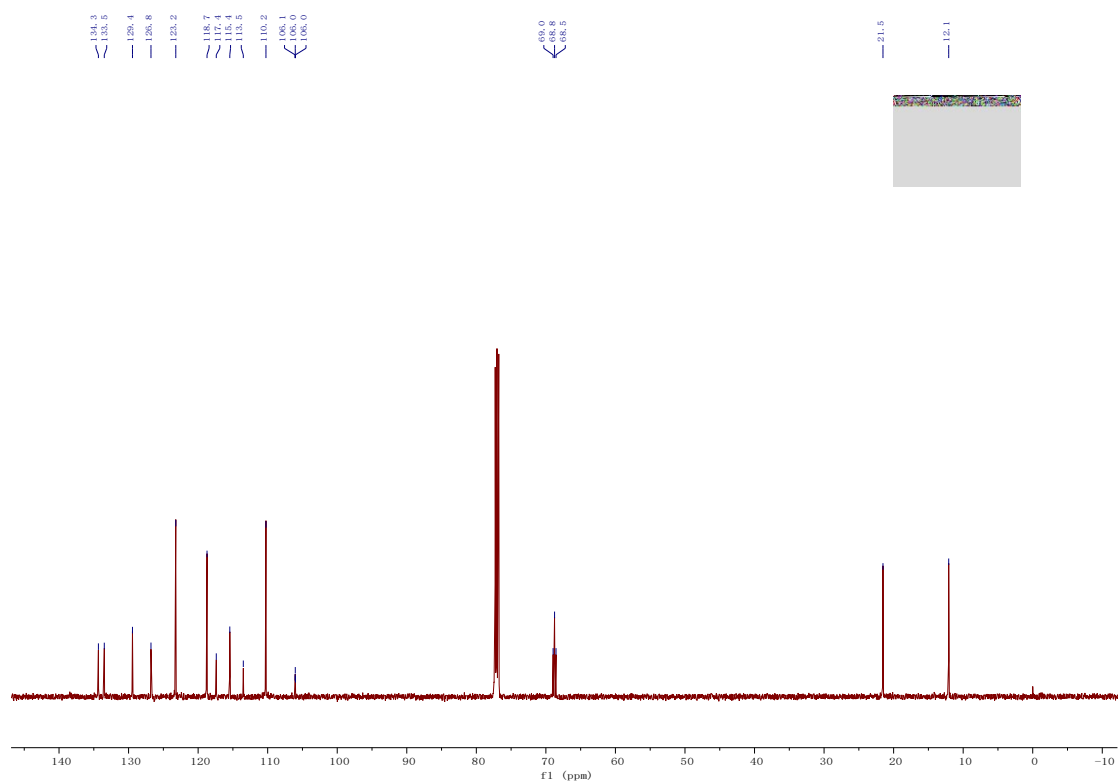

$^{19}\text{F}$  NMR (470 MHz, Chloroform-*d*) spectra of **3j'**

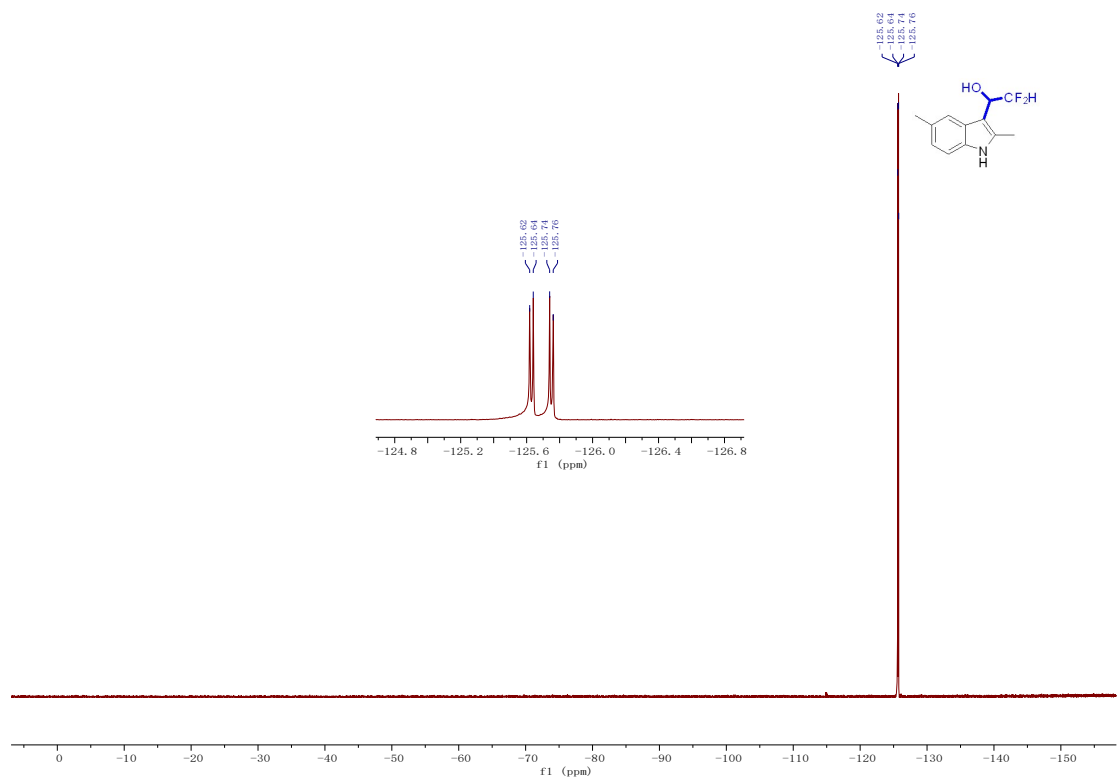

$^1\text{H}$  NMR (500 MHz, Chloroform-*d*) spectra of **31'**

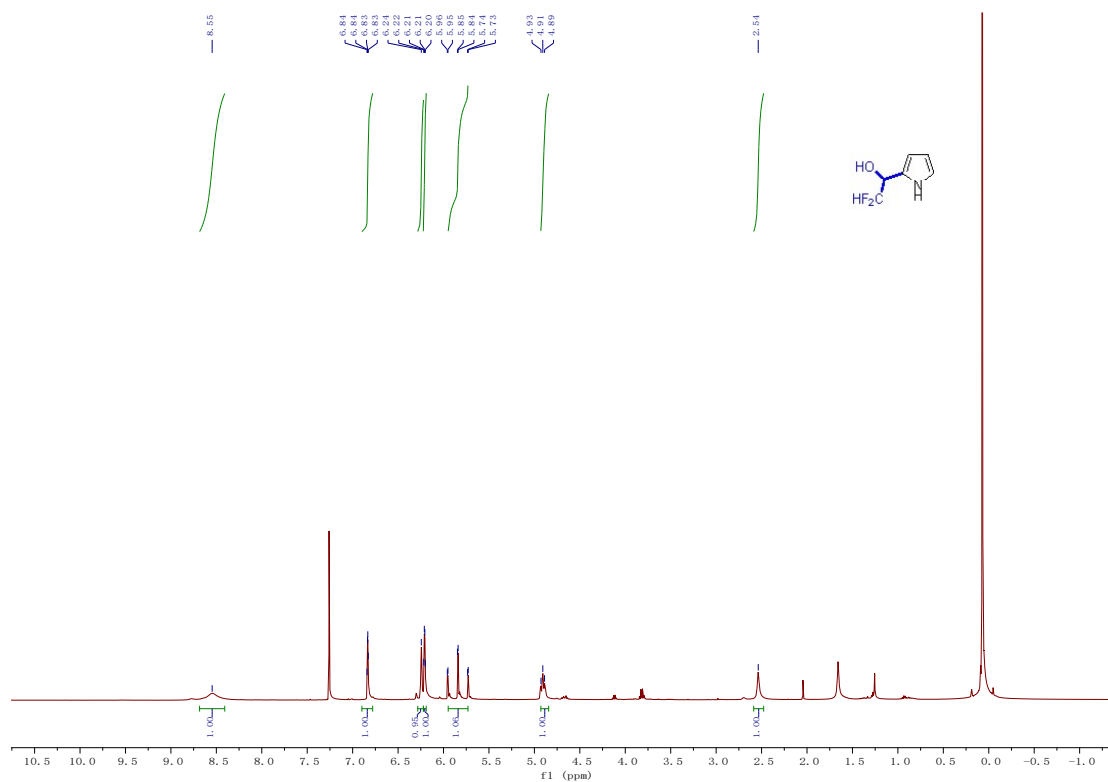

$^{13}\text{C}$  NMR (125 MHz, Chloroform-*d*) spectra of **31'**

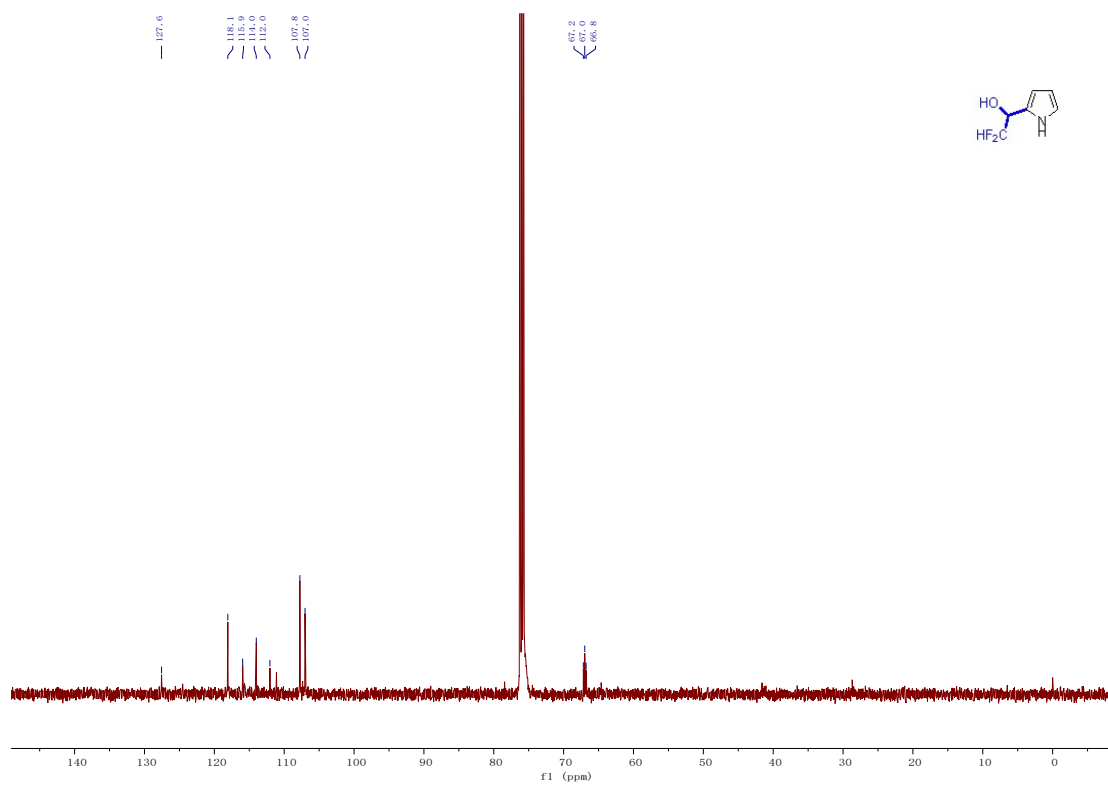



$^{19}\text{F}$  NMR (470 MHz, Chloroform-*d*) spectra of **3I'**

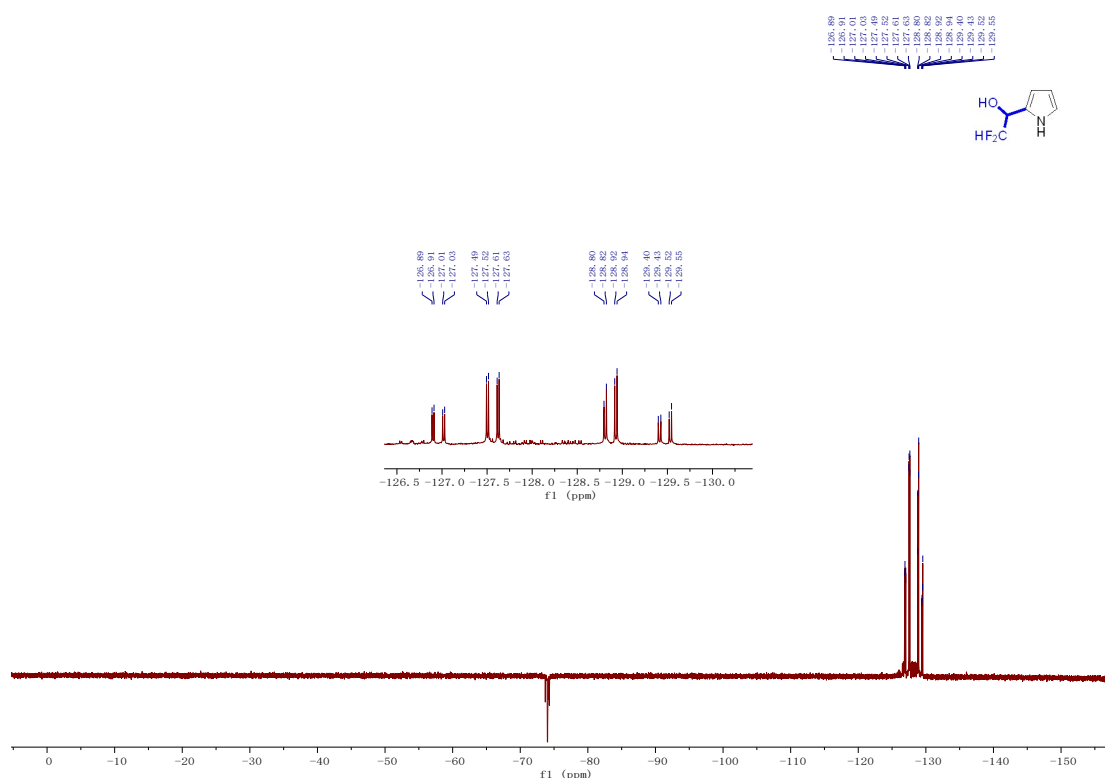

$^1\text{H}$  NMR (500 MHz, Chloroform-*d*) spectra of **3I''**

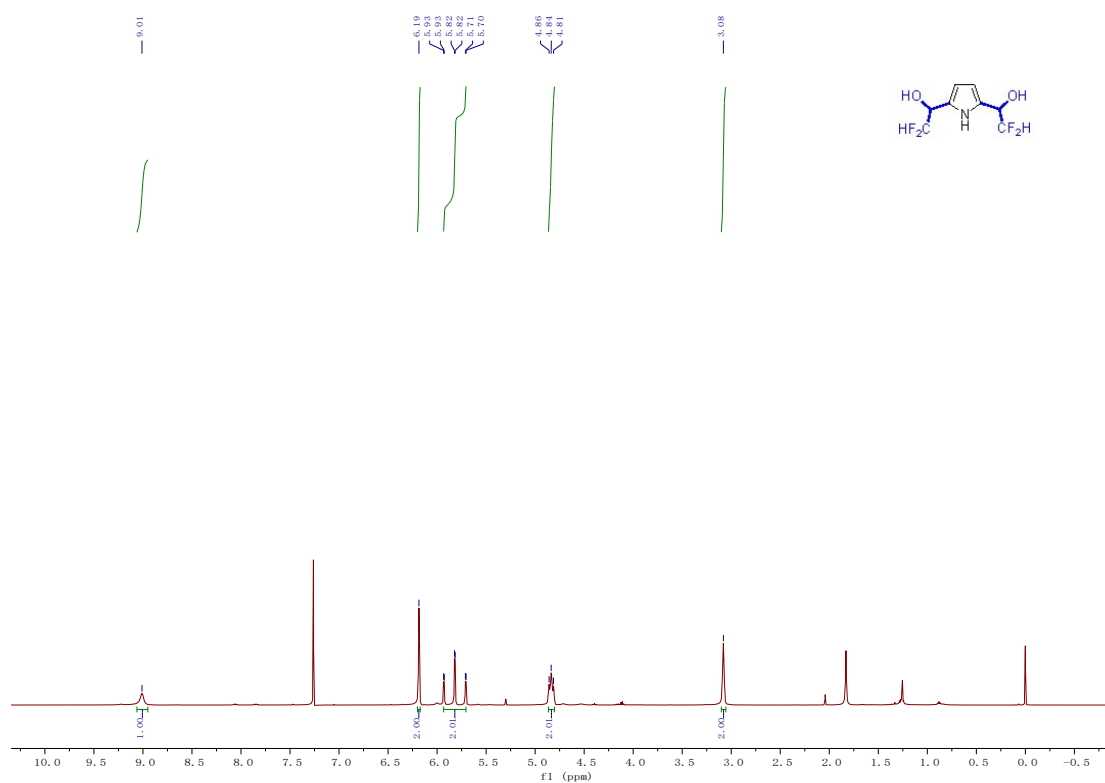

$^{13}\text{C}$  NMR (125 MHz, Chloroform-*d*) spectra of **31''**

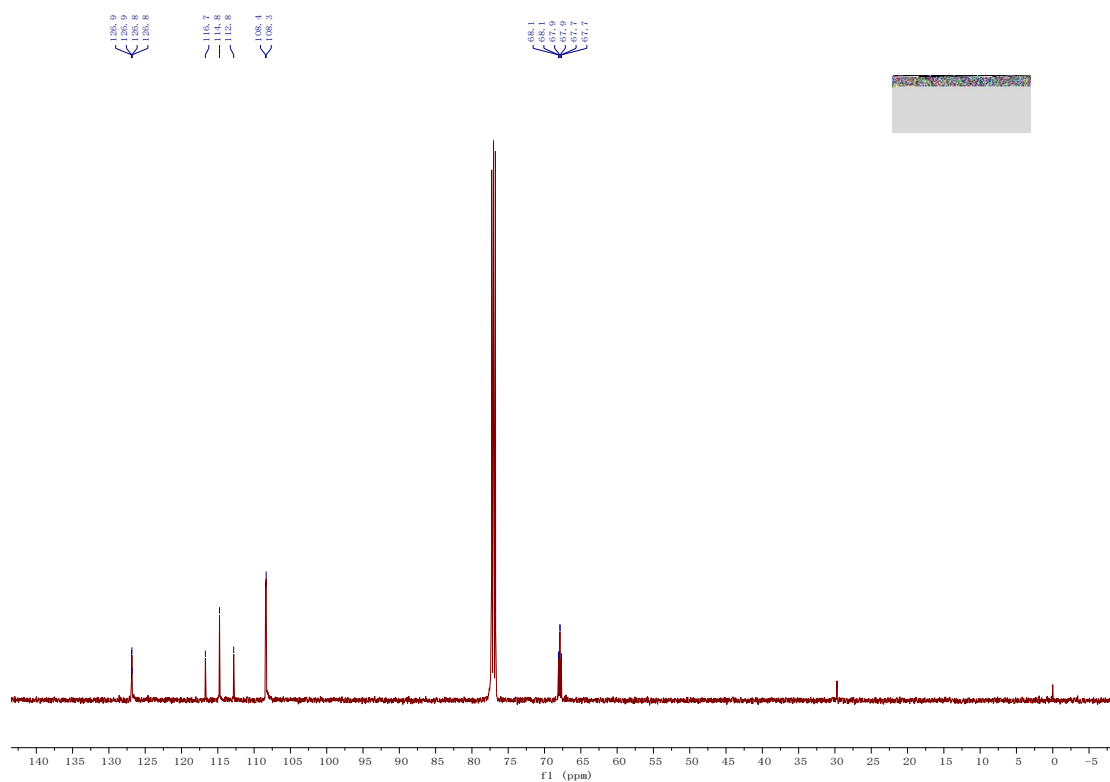

$^{19}\text{F}$  NMR (470 MHz, Chloroform-*d*) spectra of **31''**

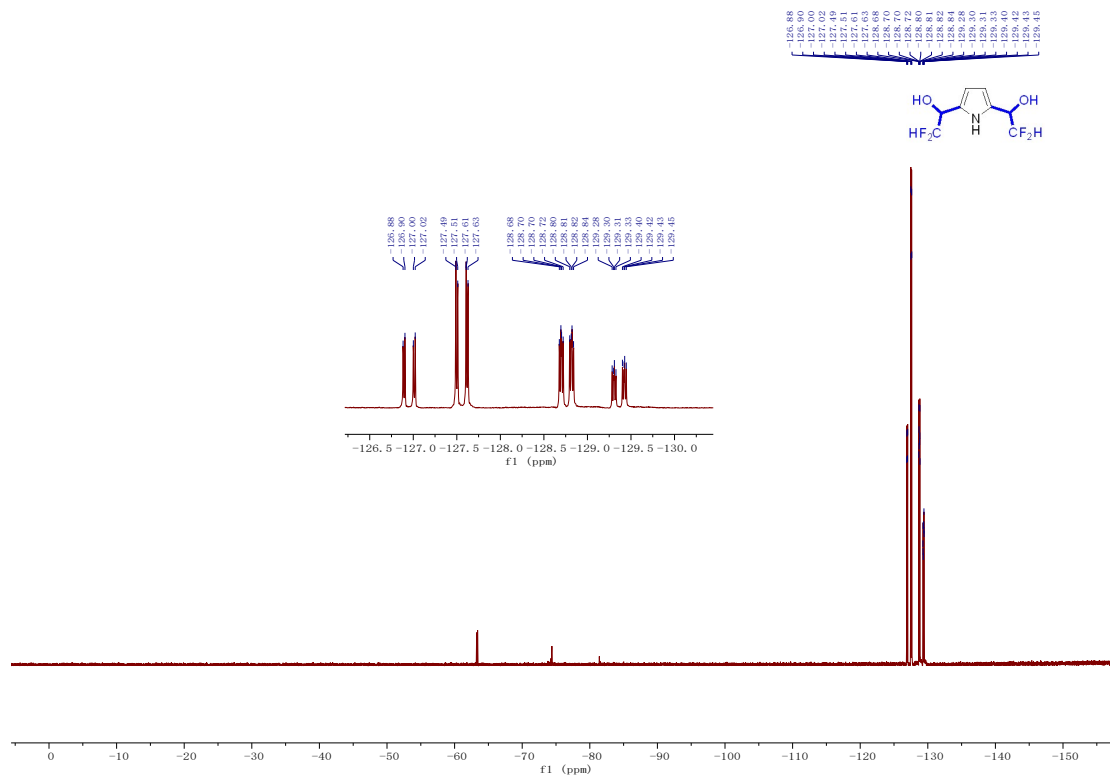

$^1\text{H}$  NMR (500 MHz, Chloroform-*d*) spectra of **3m'**

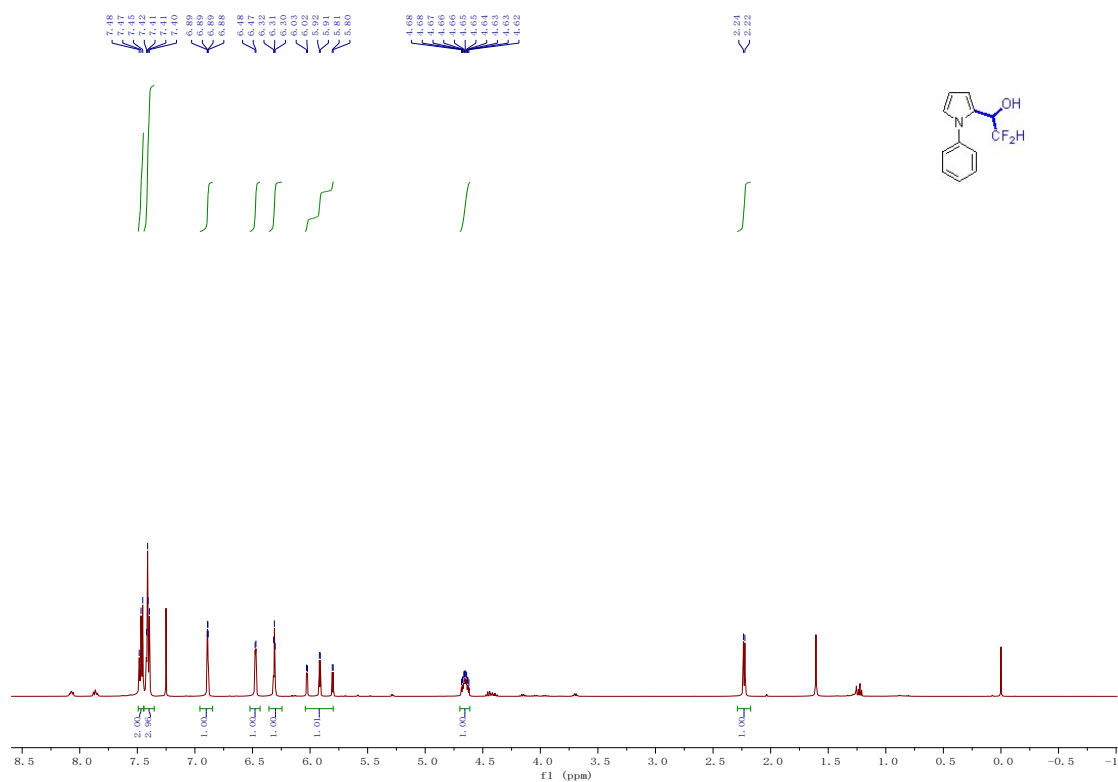

$^{13}\text{C}$  NMR (125 MHz, Chloroform-*d*) spectra of **3m'**

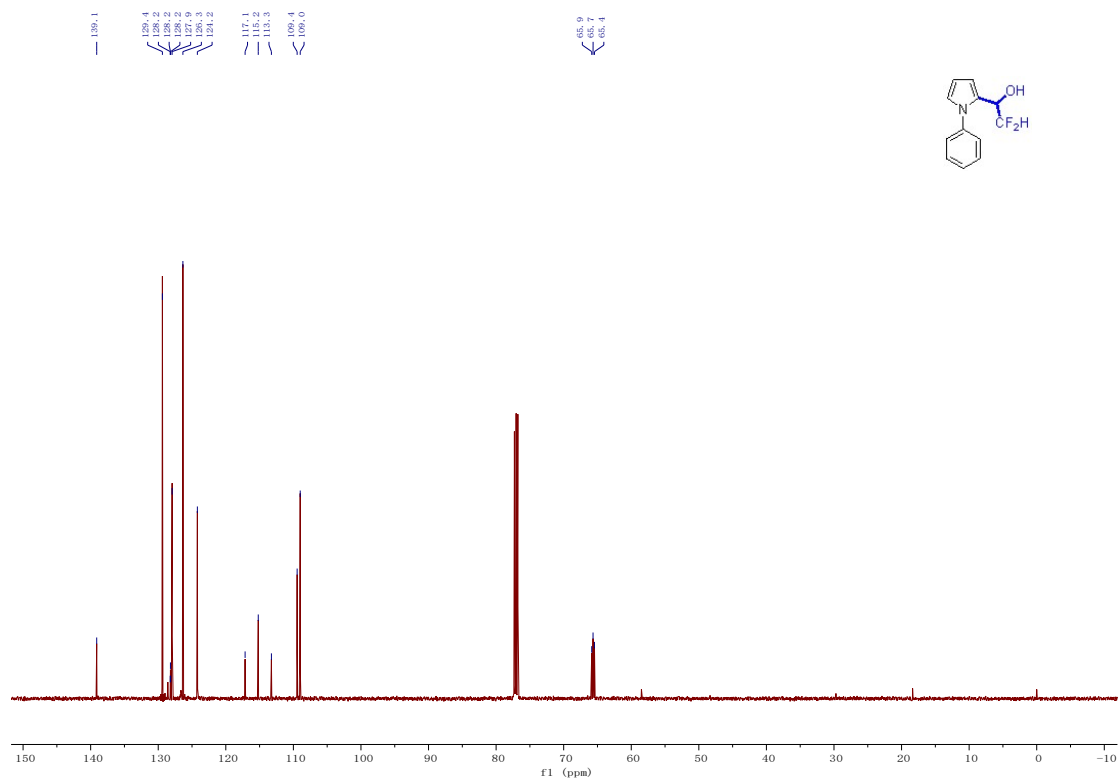

<sup>19</sup>F NMR (470 MHz, Chloroform-*d*) spectra of **3m'**

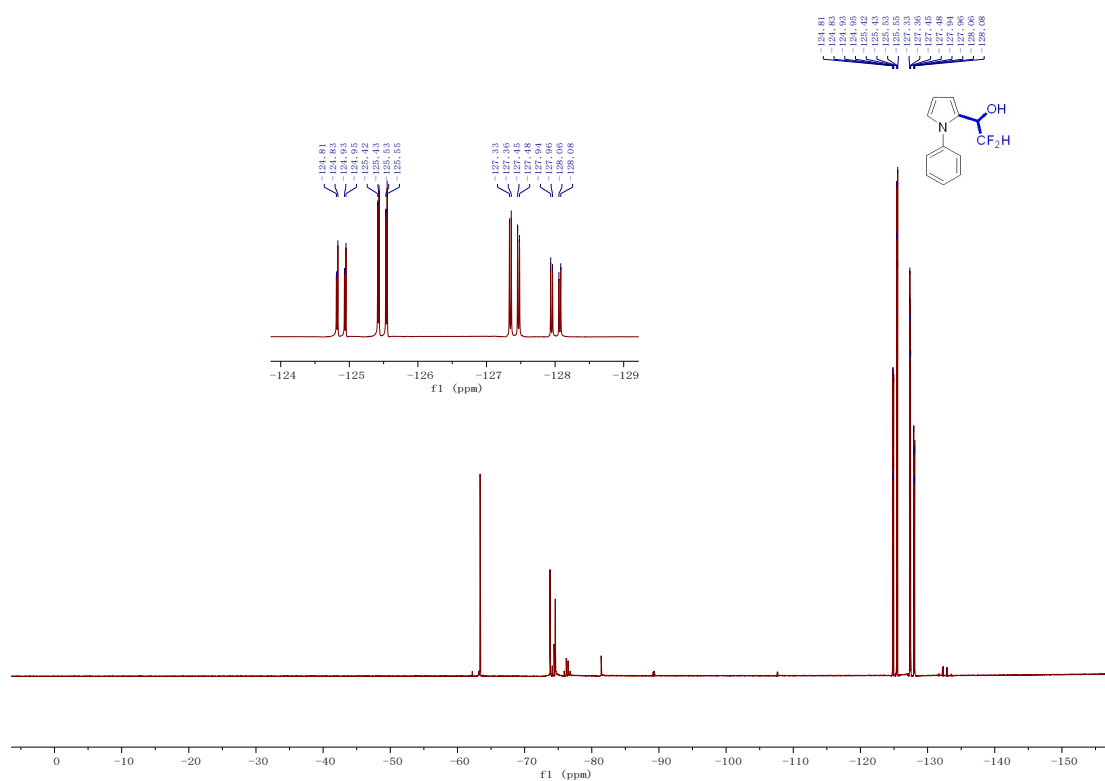

<sup>1</sup>H NMR (500 MHz, Chloroform-*d*) spectra of **5a**

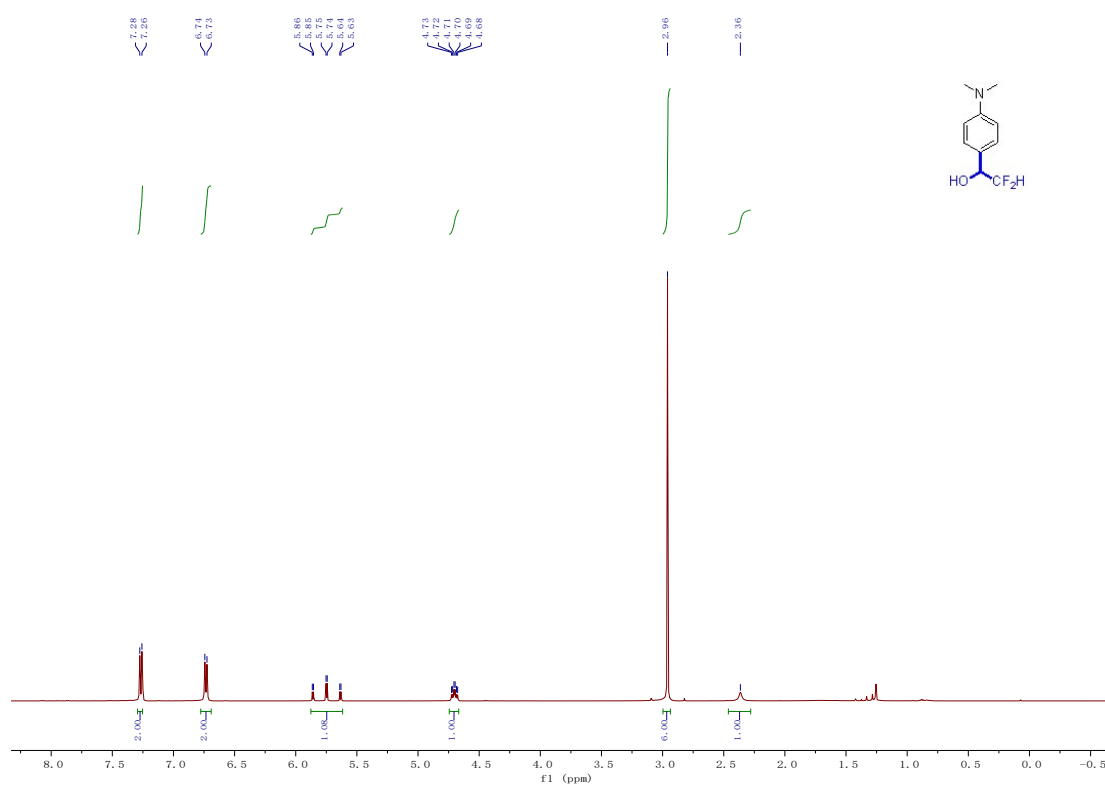

<sup>13</sup>C NMR (125 MHz, Chloroform-*d*) spectra of **5a**

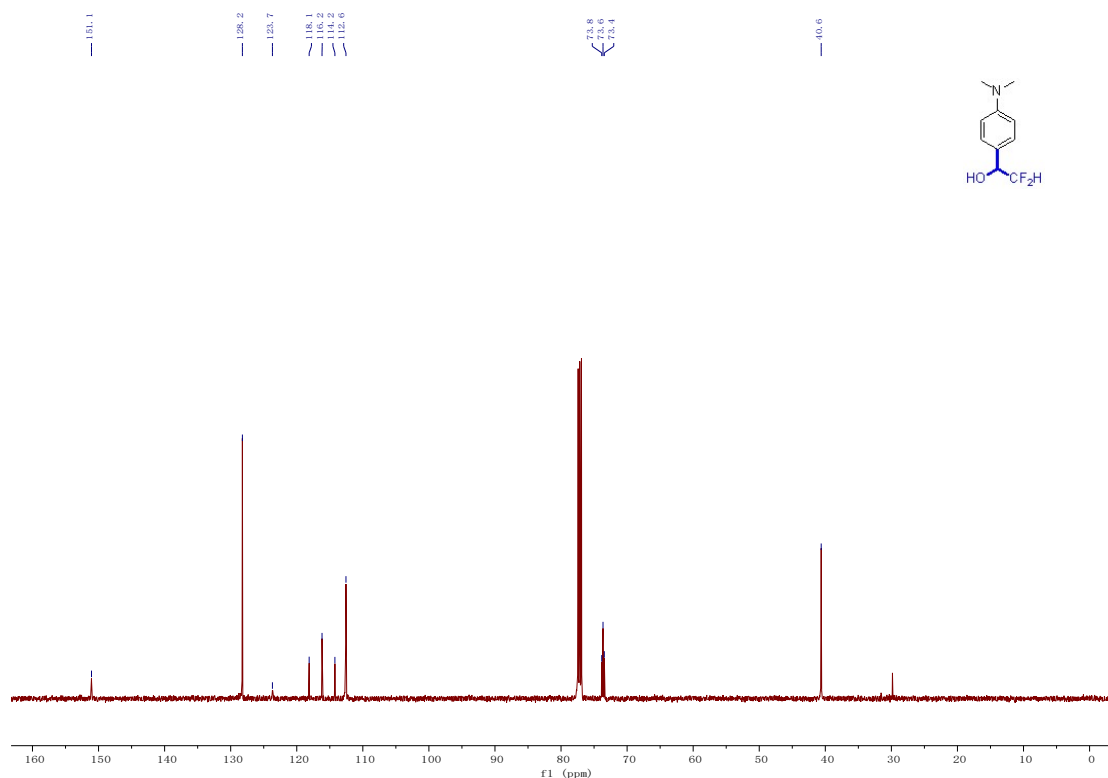

<sup>19</sup>F NMR (470 MHz, Chloroform-*d*) spectra of **5a**

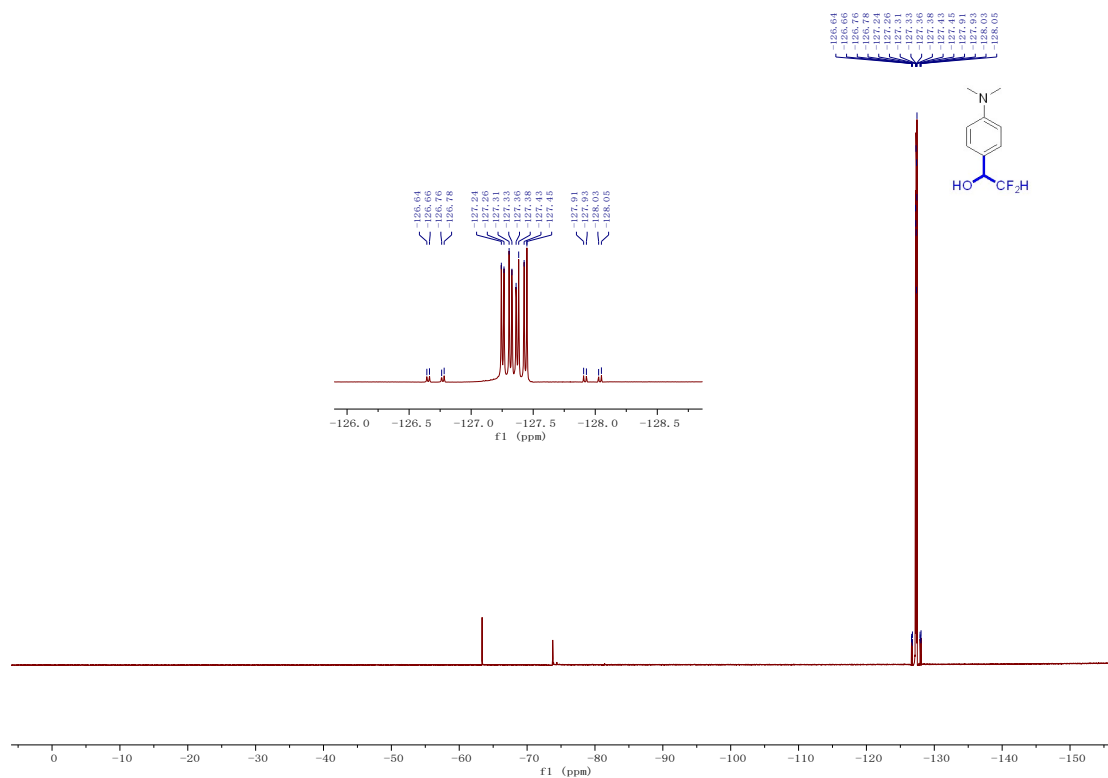

<sup>1</sup>H NMR (500 MHz, Chloroform-*d*) spectra of **5b**

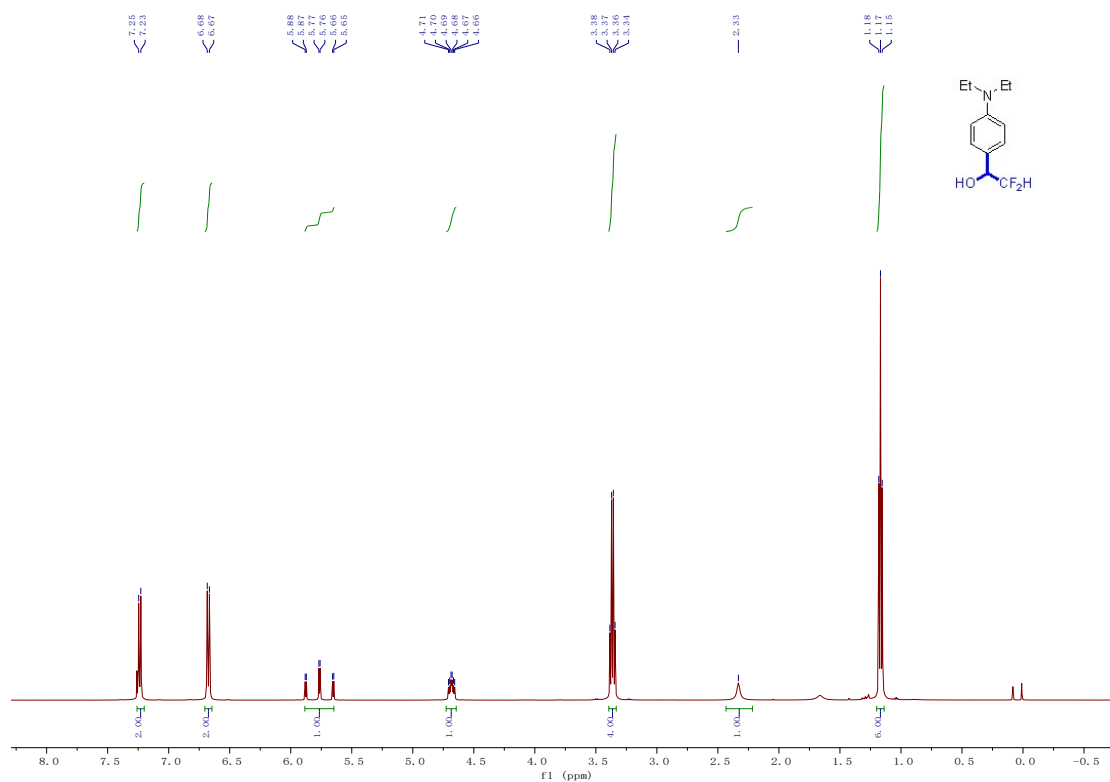

<sup>13</sup>C NMR (125 MHz, Chloroform-*d*) spectra of **5b**

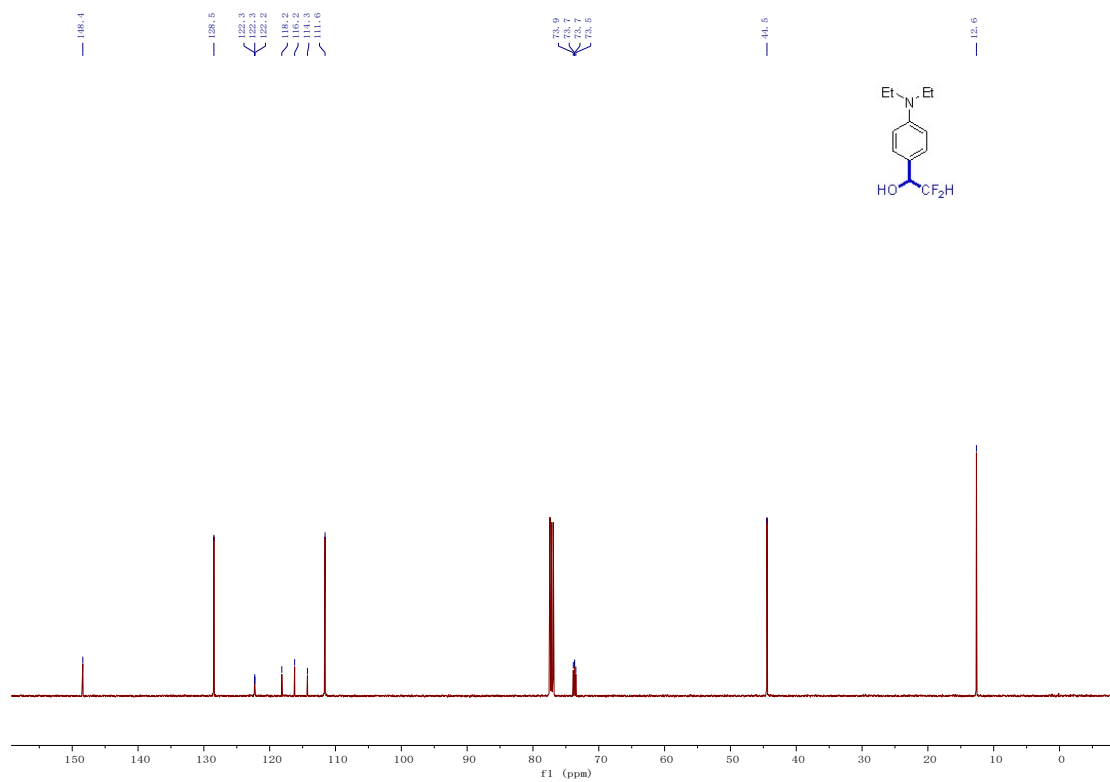

$^{19}\text{F}$  NMR (470 MHz, Chloroform-*d*) spectra of **5b**

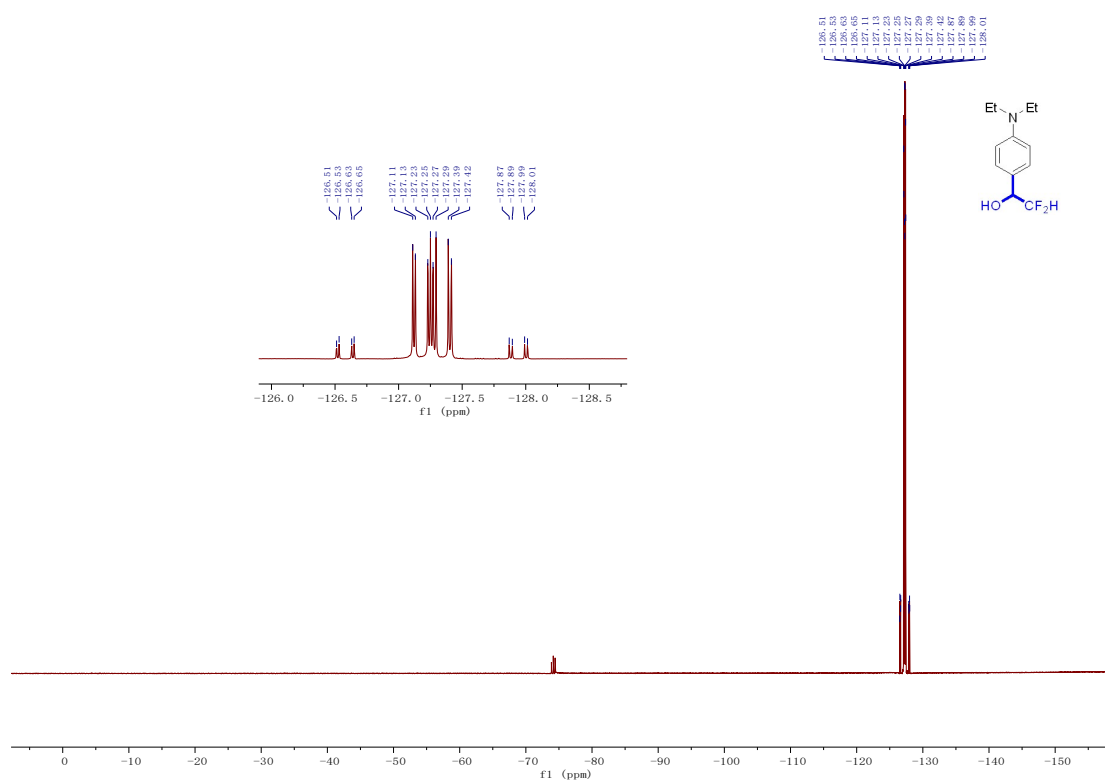

$^1\text{H}$  NMR (500 MHz, Chloroform-*d*) spectra of **5c**

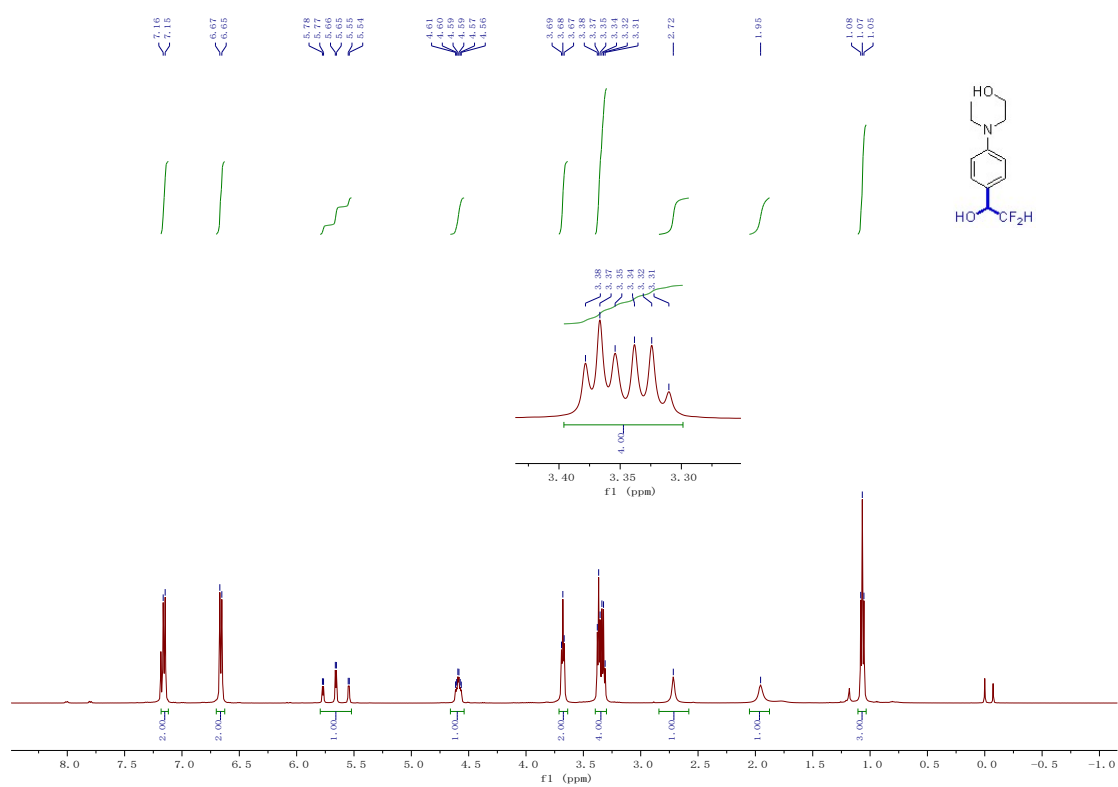

$^{13}\text{C}$  NMR (125 MHz, Chloroform-*d*) spectra of **5c**

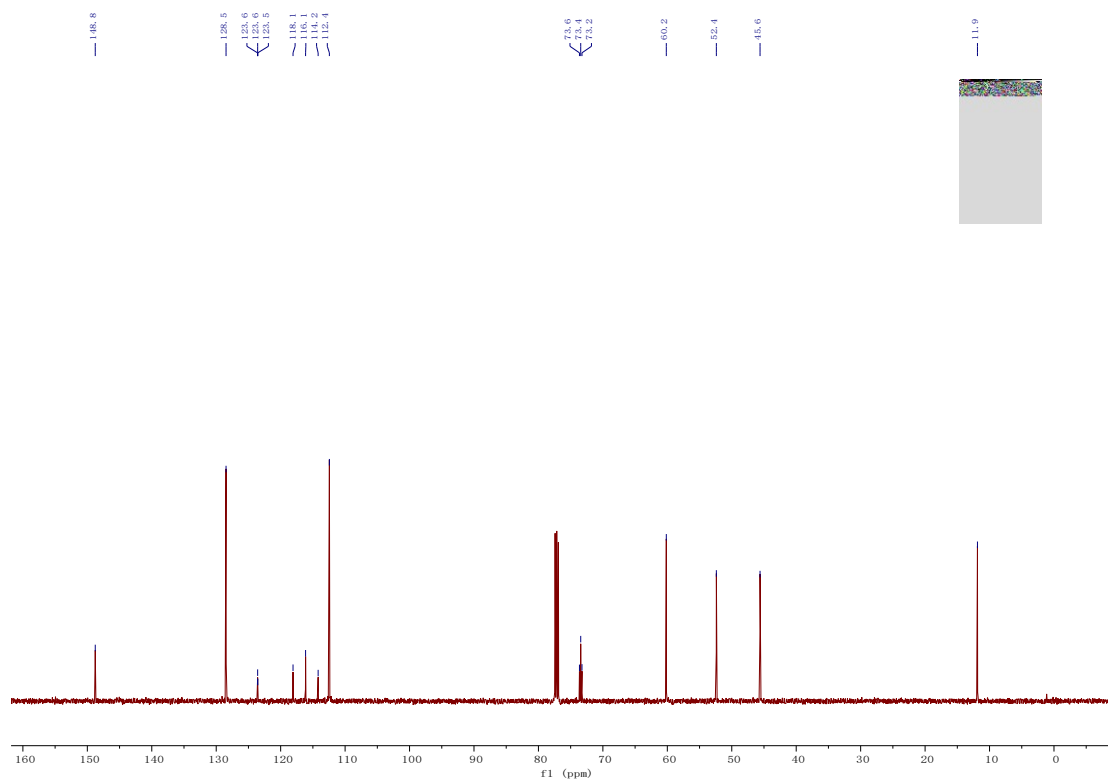

$^{19}\text{F}$  NMR (470 MHz, Chloroform-*d*) spectra of **5c**

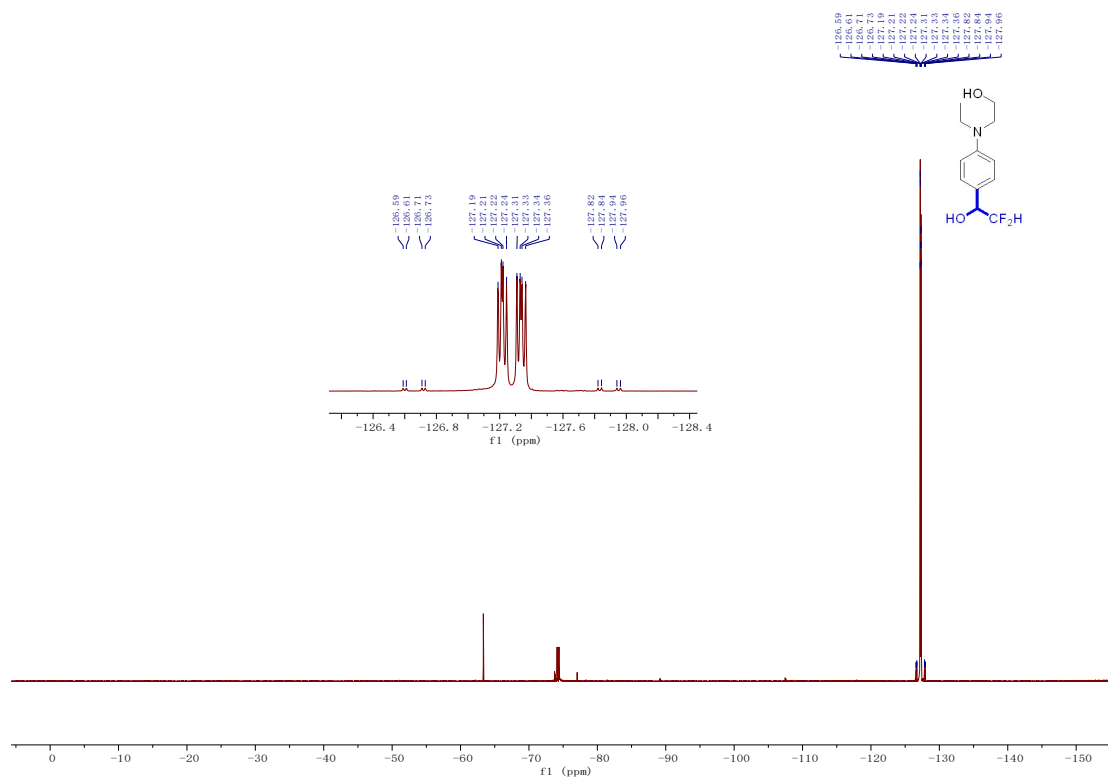



<sup>1</sup>H NMR (500 MHz, Chloroform-*d*) spectra of **5d**

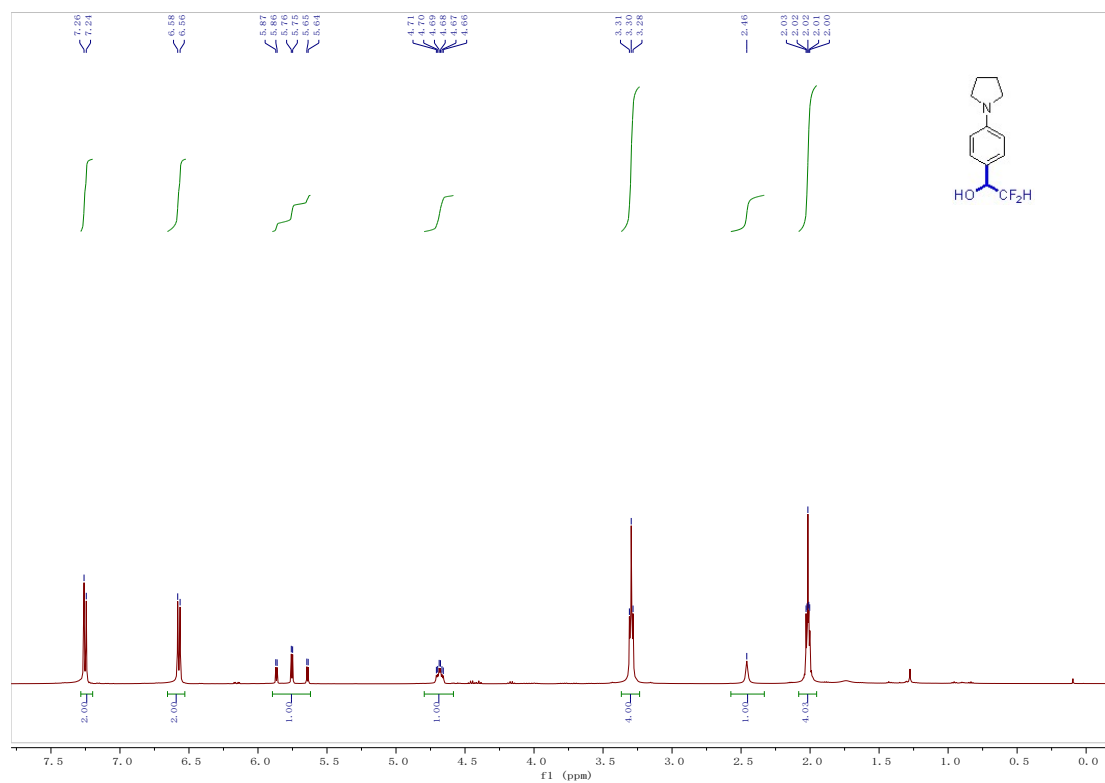

<sup>13</sup>C NMR (125 MHz, Chloroform-*d*) spectra of **5d**

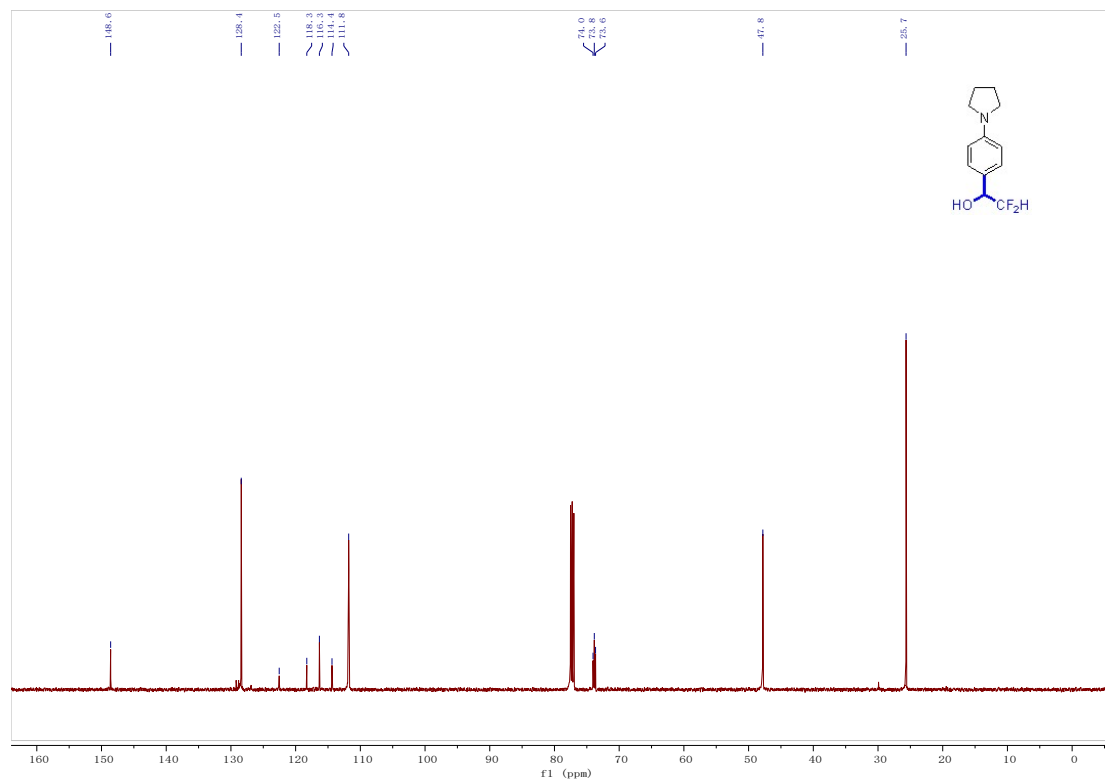

$^{19}\text{F}$  NMR (470 MHz, Chloroform-*d*) spectra of **5d**

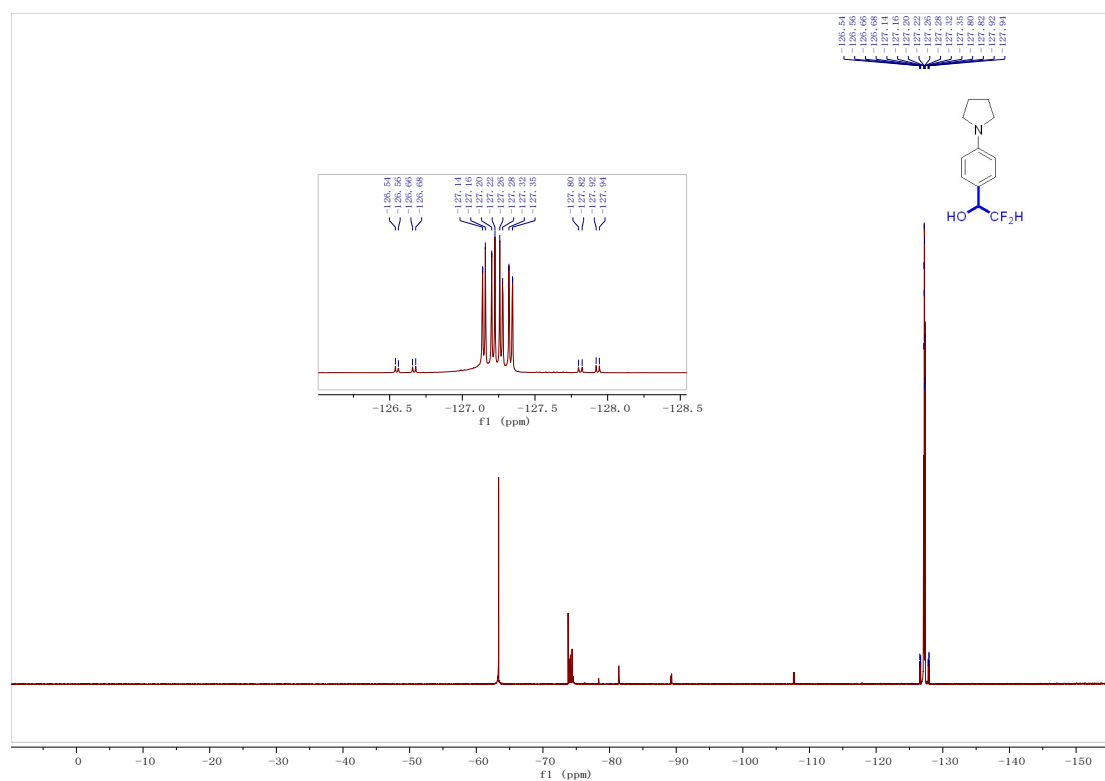

$^1\text{H}$  NMR (500 MHz, Chloroform-*d*) spectra of **5e**

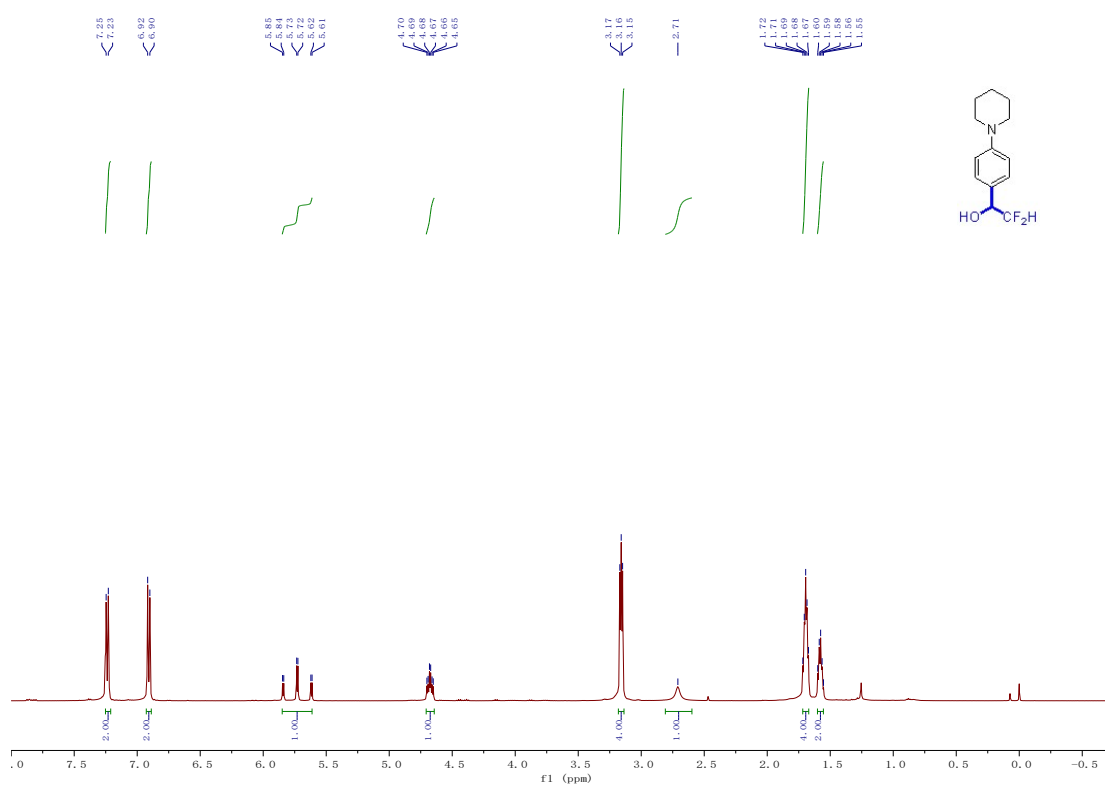

$^{13}\text{C}$  NMR (125 MHz, Chloroform-*d*) spectra of **5e**

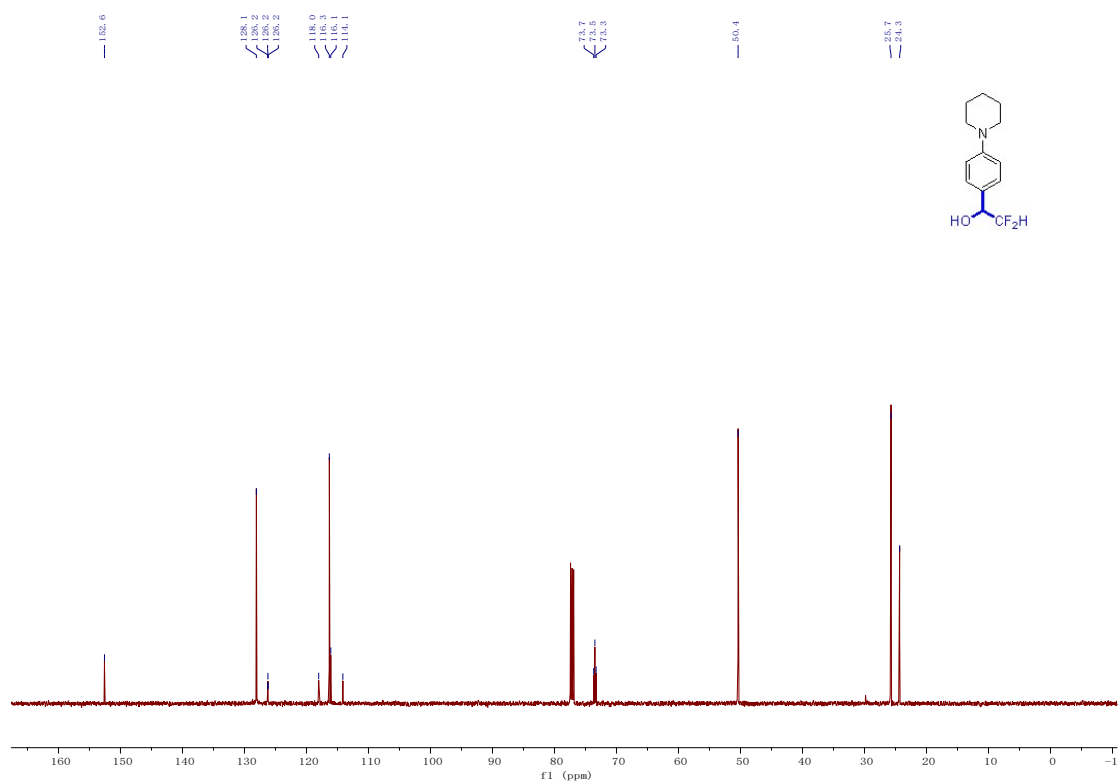

$^{19}\text{F}$  NMR (470 MHz, Chloroform-*d*) spectra of **5e**

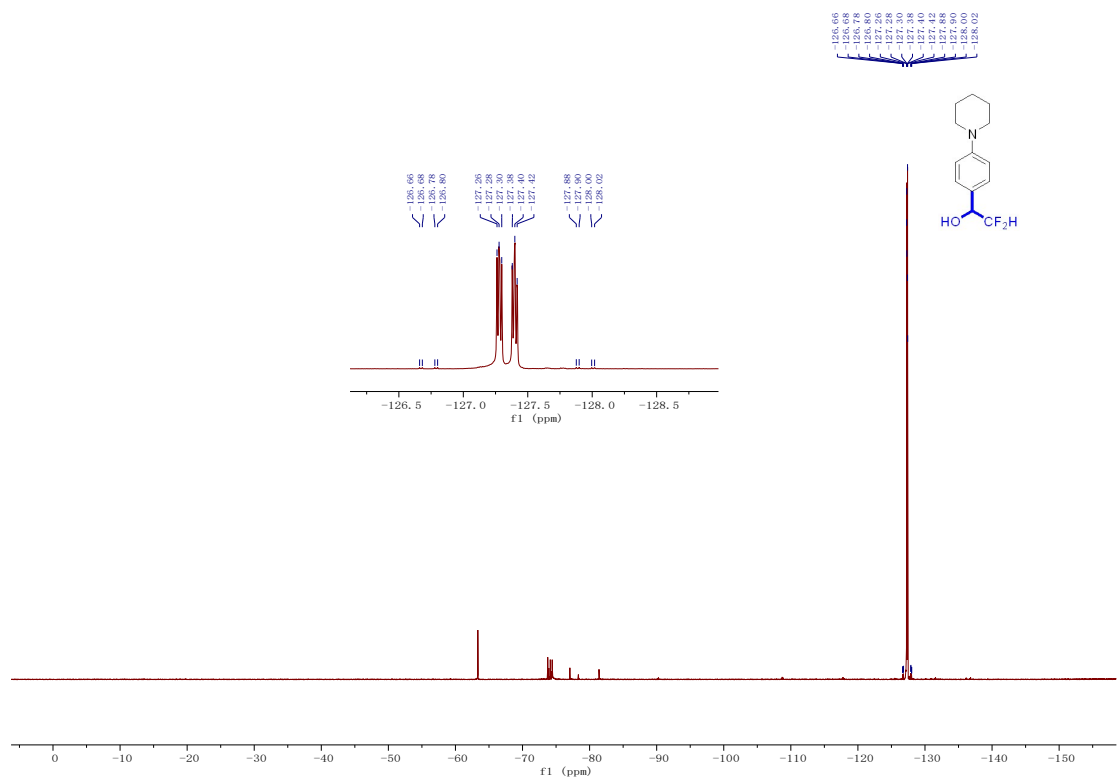

<sup>1</sup>H NMR (500 MHz, Chloroform-*d*) spectra of **5f**

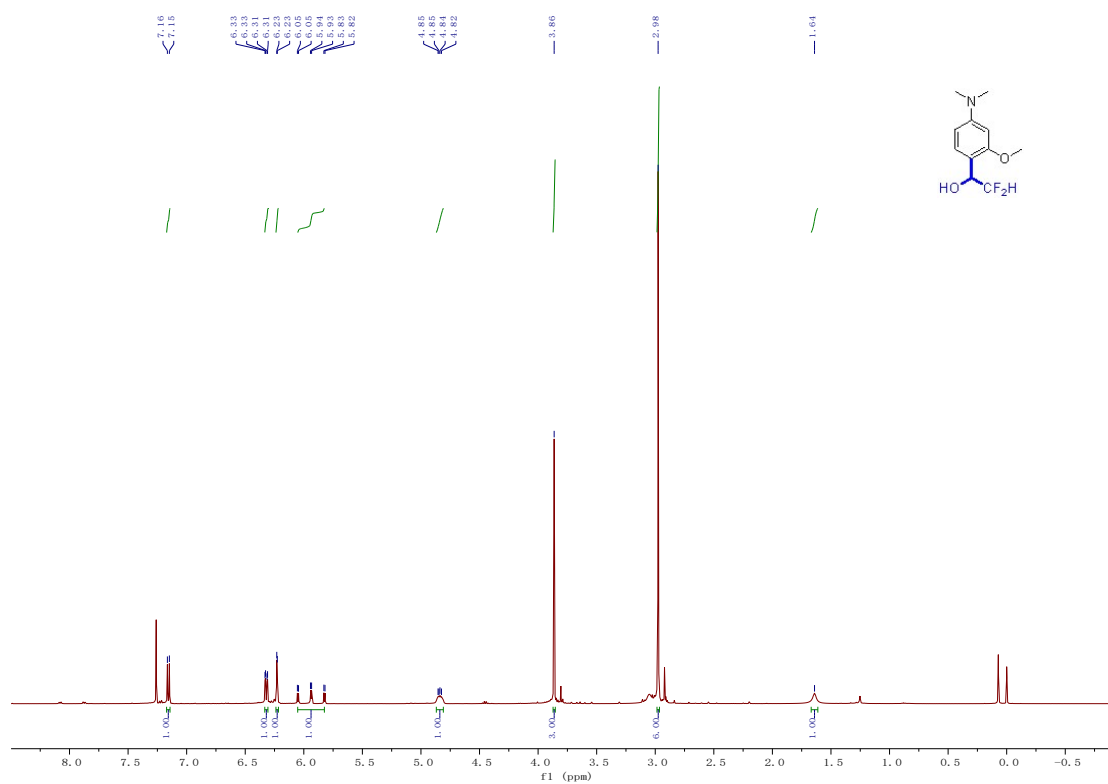

<sup>13</sup>C NMR (125 MHz, Chloroform-*d*) spectra of **5f**

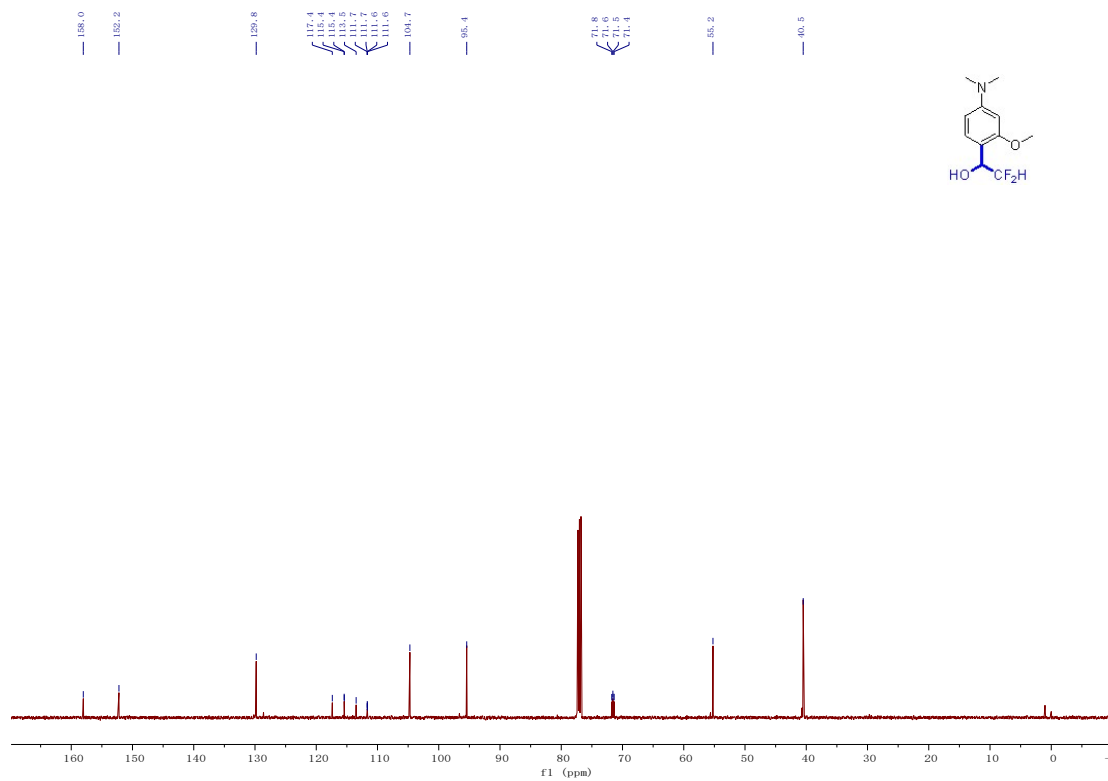

$^{19}\text{F}$  NMR (470 MHz, Chloroform-*d*) spectra of **5f**

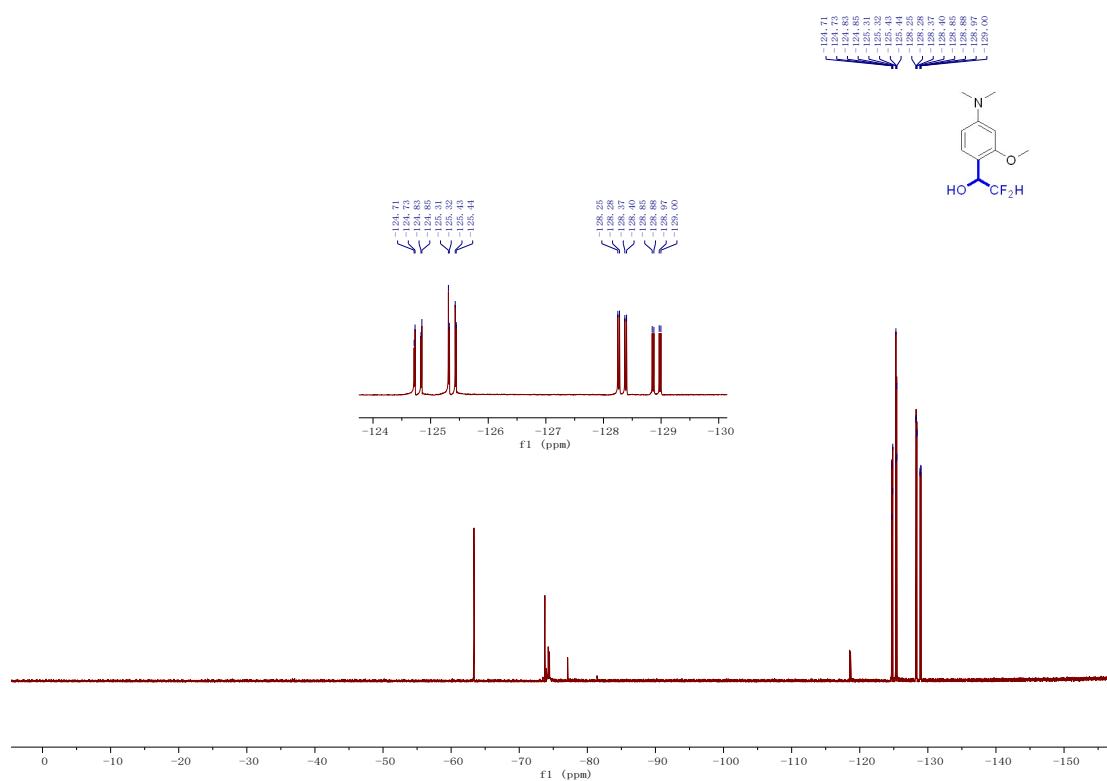

$^1\text{H}$  NMR (500 MHz, Chloroform-*d*) spectra of **5g**

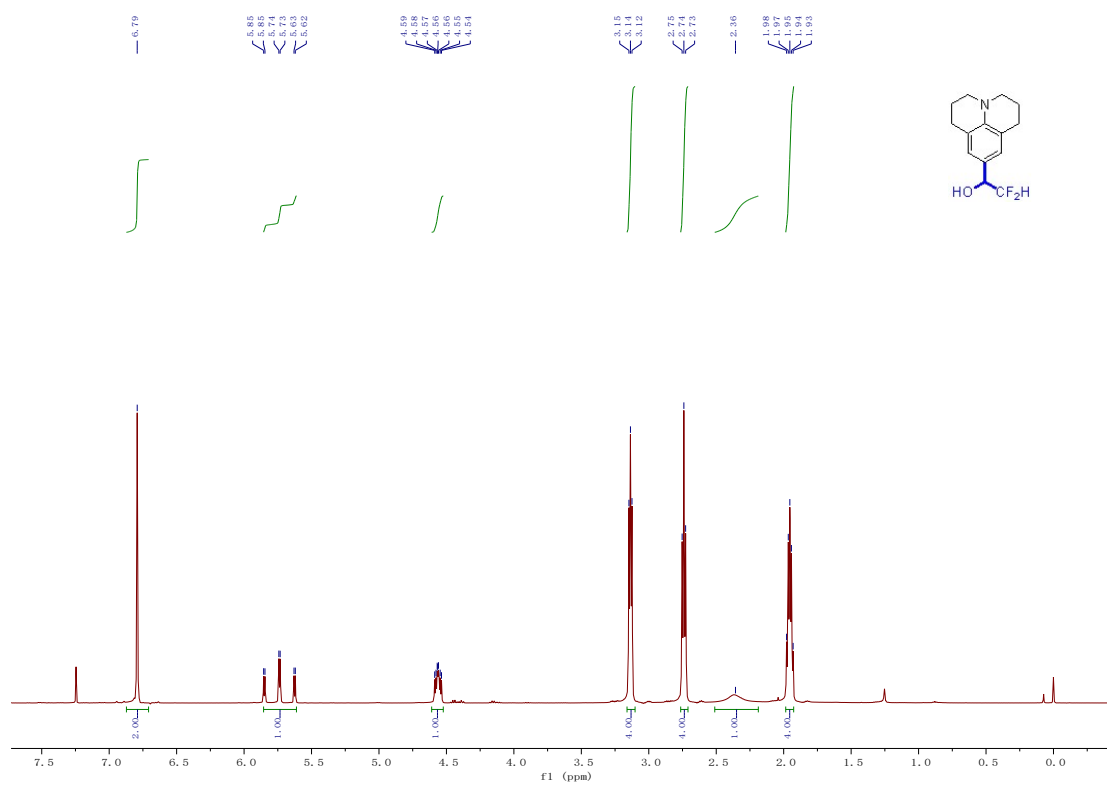

$^{13}\text{C}$  NMR (125 MHz, Chloroform-*d*) spectra of **5g**

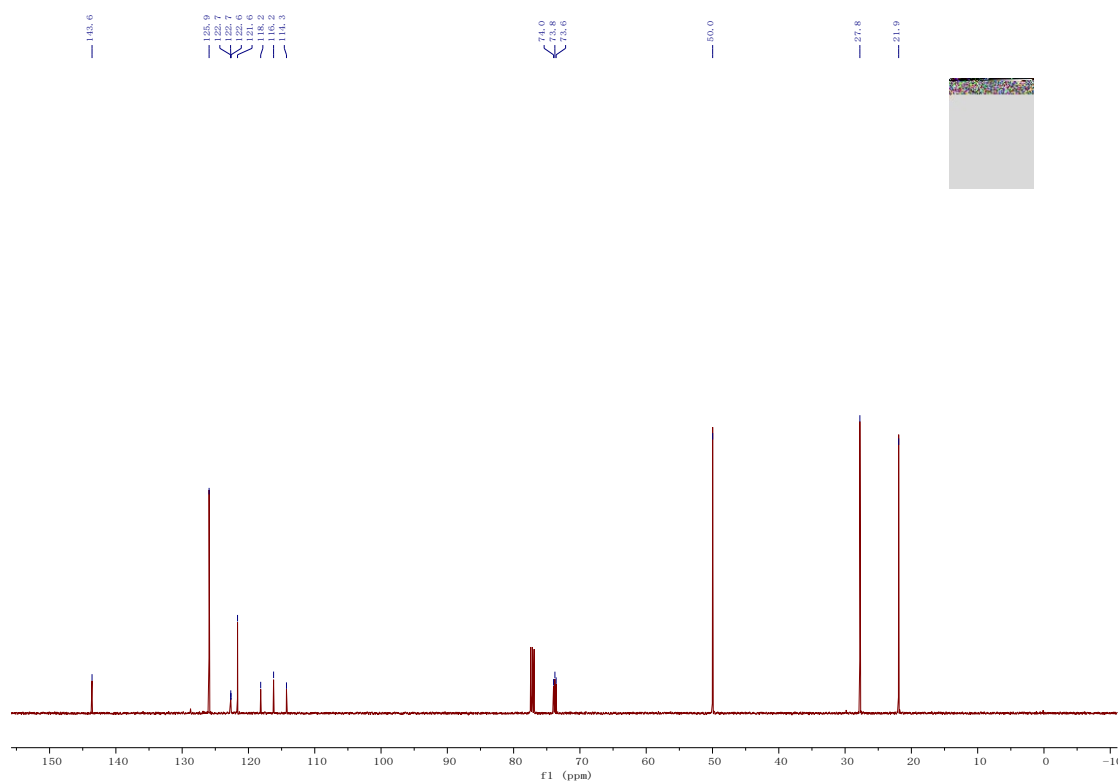

$^{19}\text{F}$  NMR (470 MHz, Chloroform-*d*) spectra of **5g**

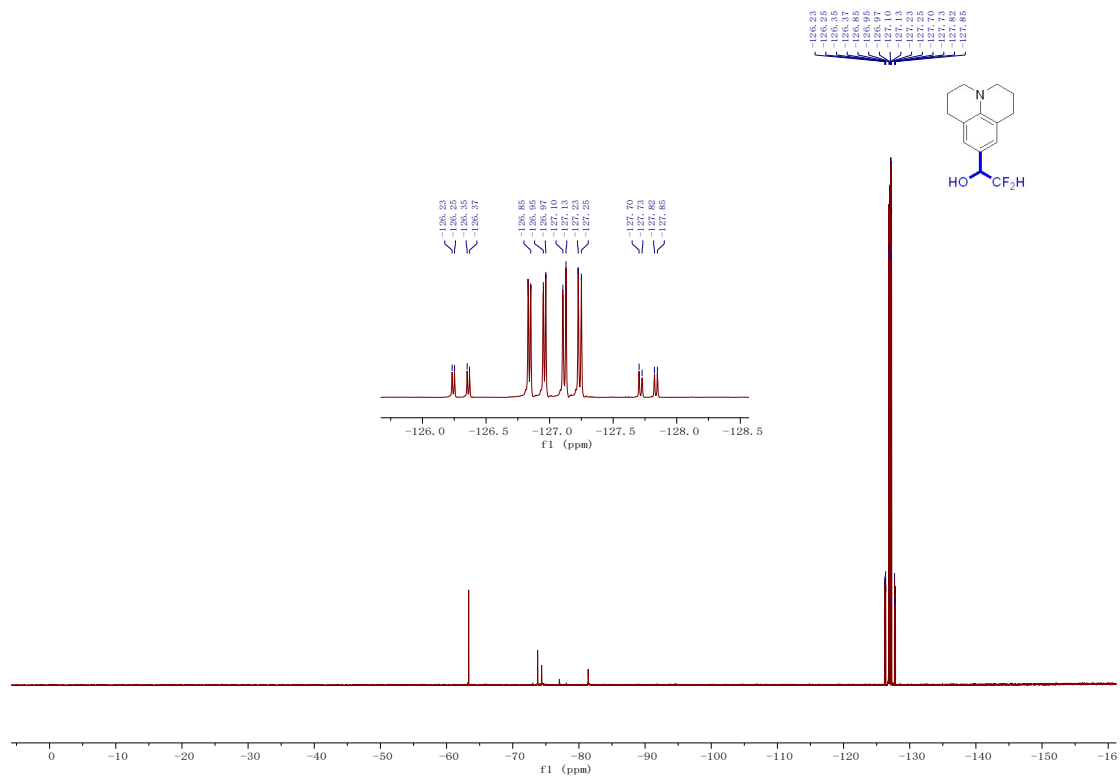

<sup>1</sup>H NMR (500 MHz, Chloroform-*d*) spectra of **5h**

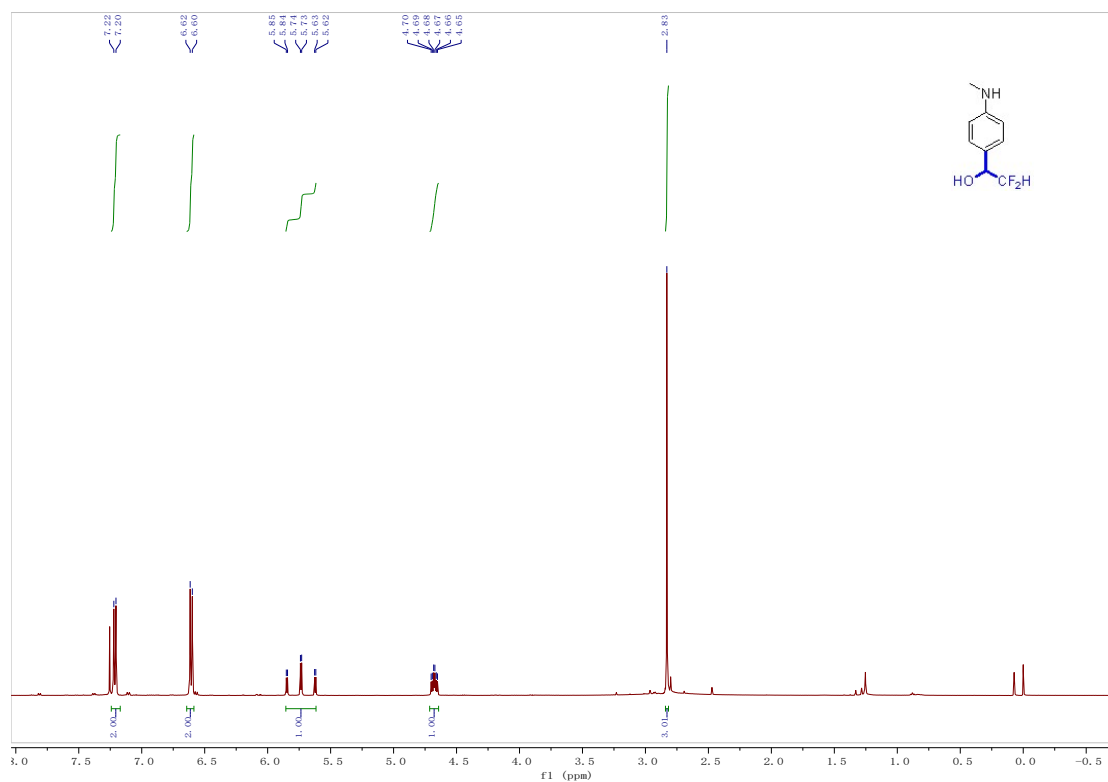

<sup>13</sup>C NMR (125 MHz, Chloroform-*d*) spectra of **5h**

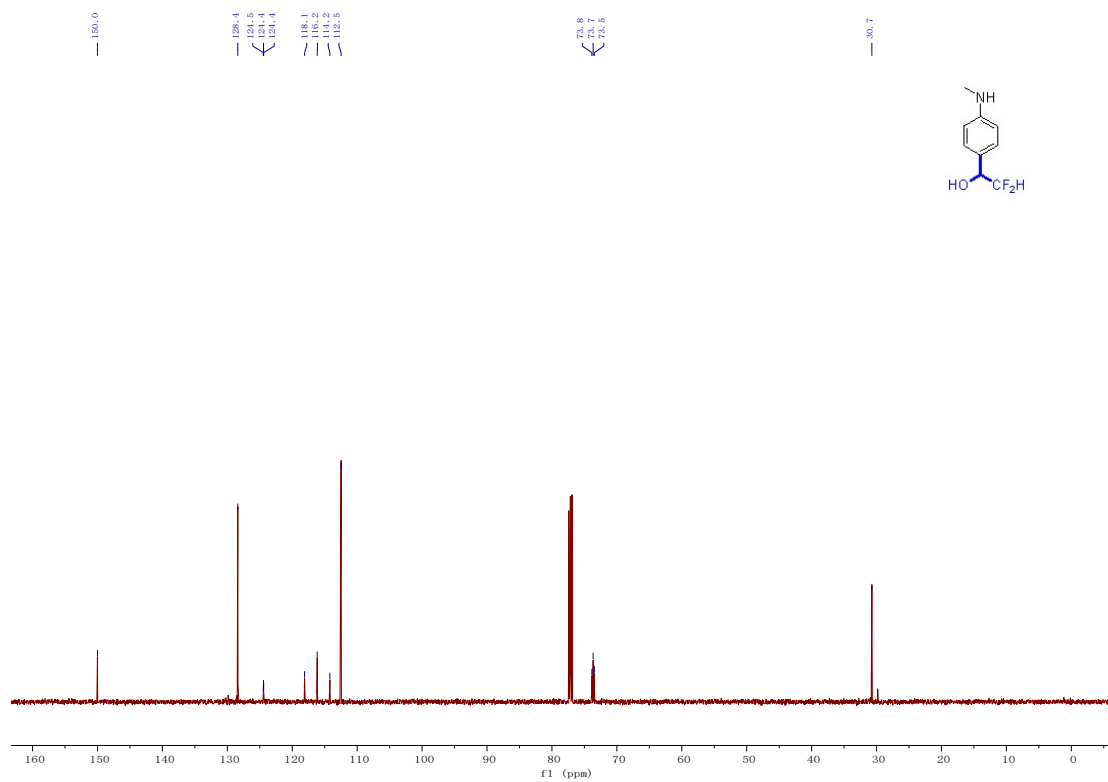

<sup>19</sup>F NMR (470 MHz, Chloroform-*d*) spectra of **5h**

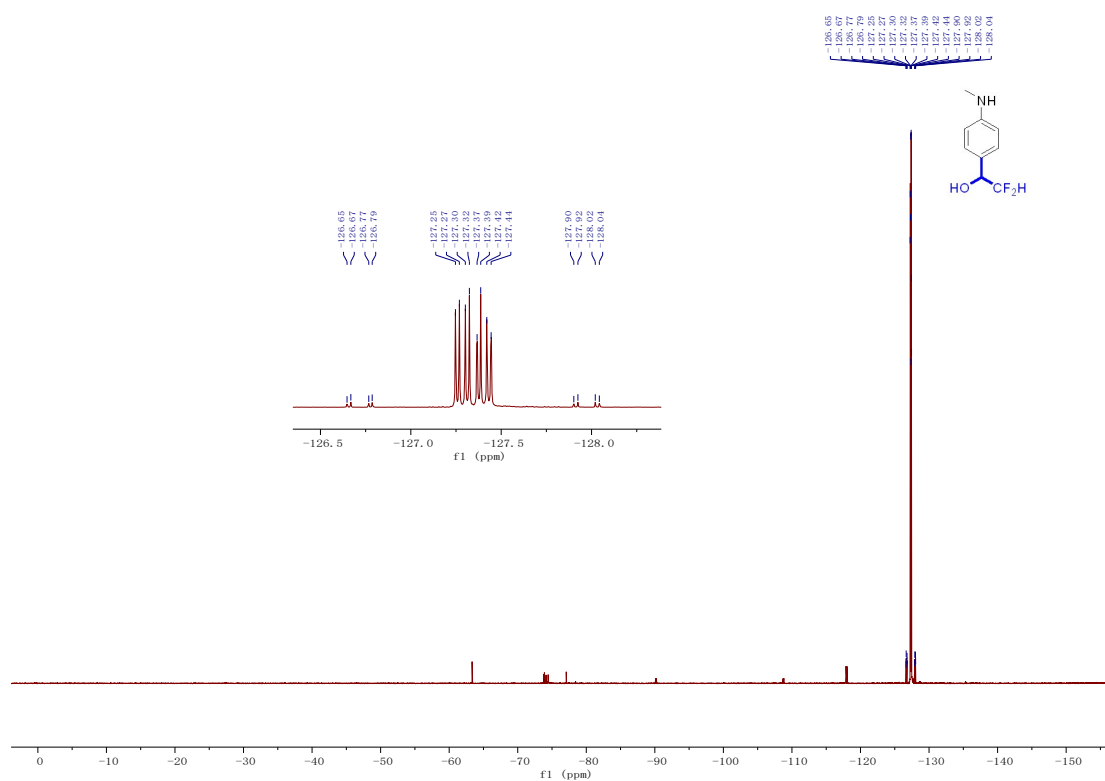

<sup>1</sup>H NMR (500 MHz, Chloroform-*d*) spectra of **5i**

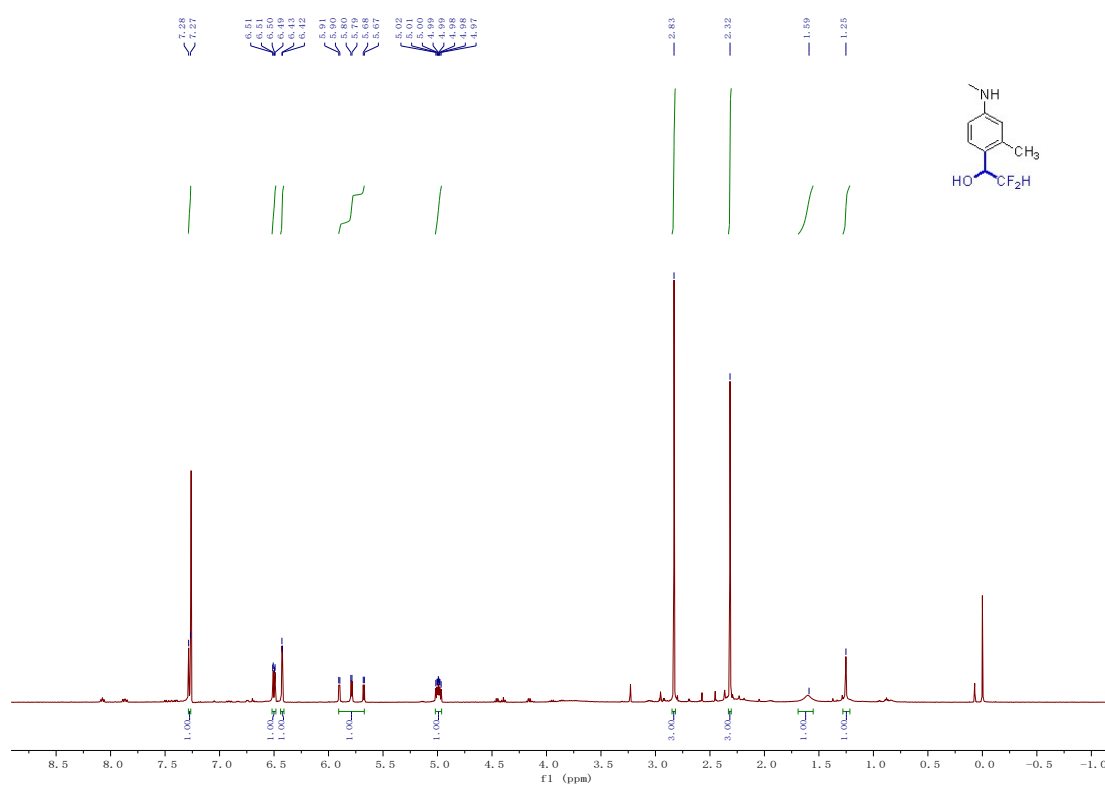



$^{13}\text{C}$  NMR (125 MHz, Chloroform-*d*) spectra of **5i**

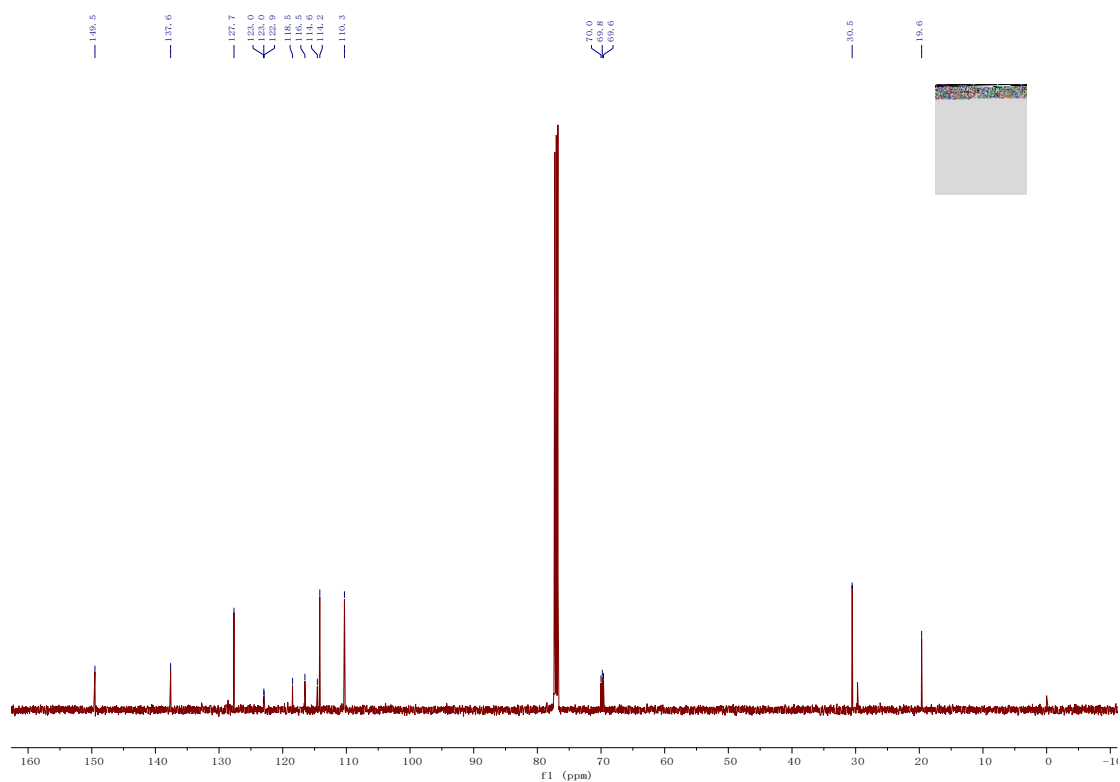

$^{19}\text{F}$  NMR (470 MHz, Chloroform-*d*) spectra of **5i**

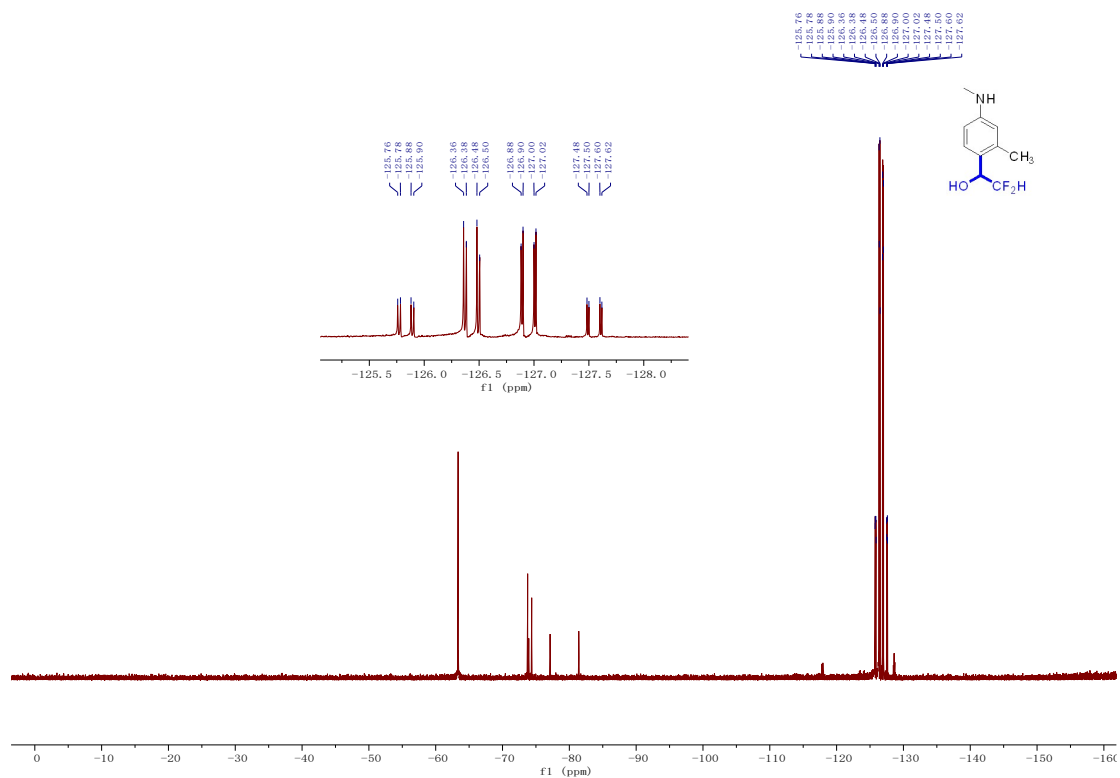

<sup>1</sup>H NMR (500 MHz, Chloroform-*d*) spectra of **5j**

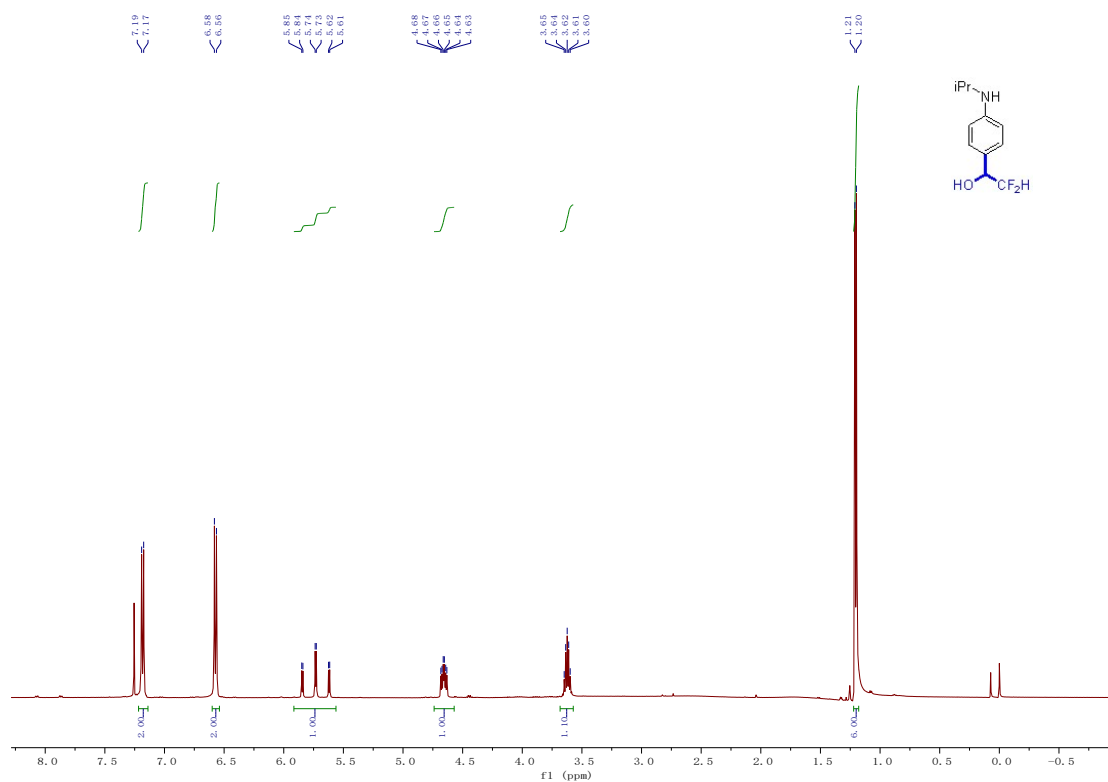

<sup>13</sup>C NMR (125 MHz, Chloroform-*d*) spectra of **5j**

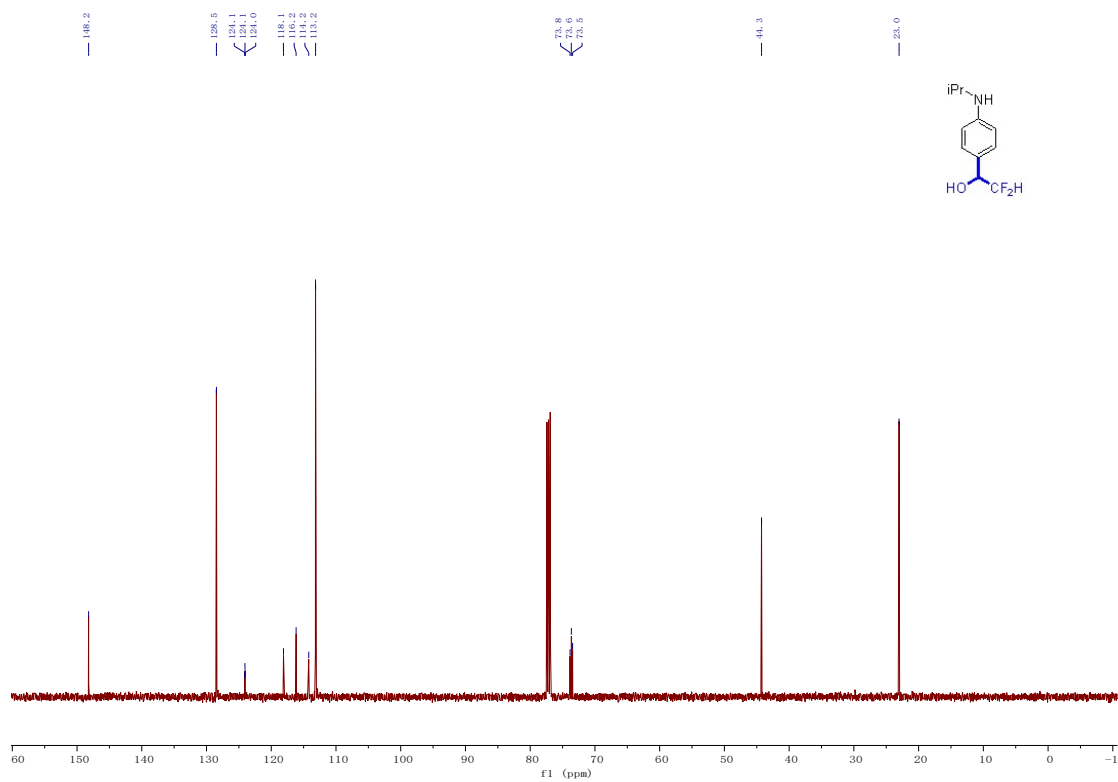

<sup>19</sup>F NMR (470 MHz, Chloroform-*d*) spectra of **5j**

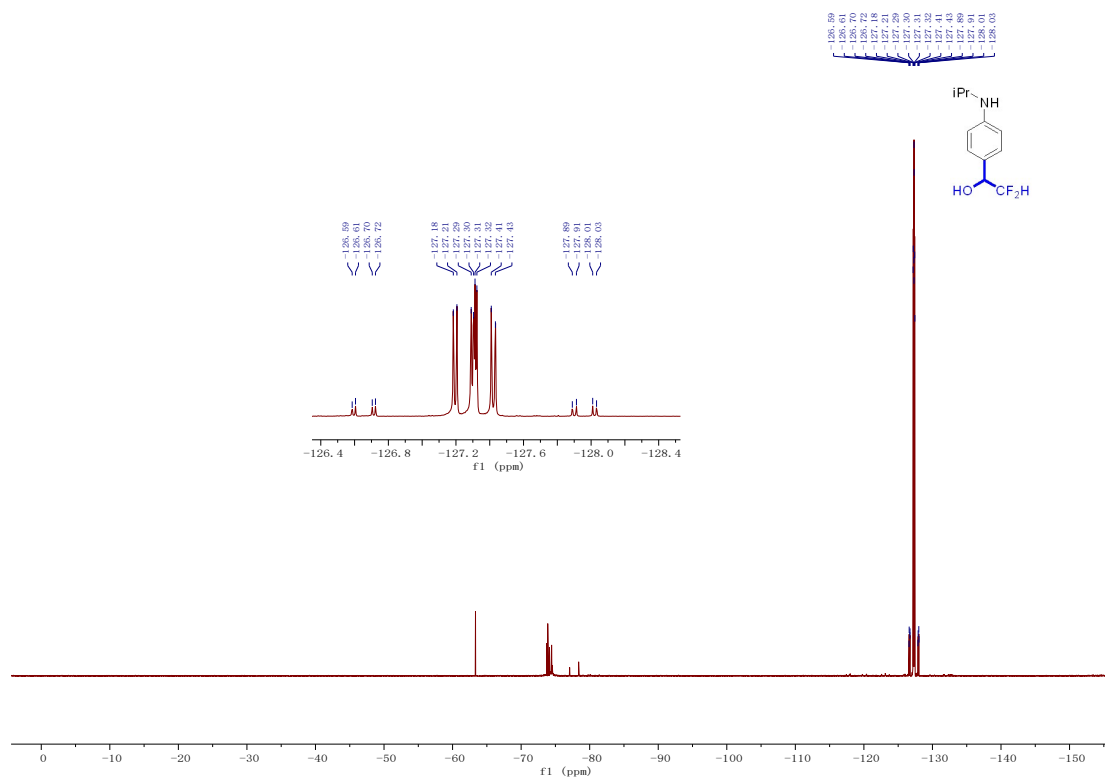

<sup>1</sup>H NMR (500 MHz, Chloroform-*d*) spectra of **5k**

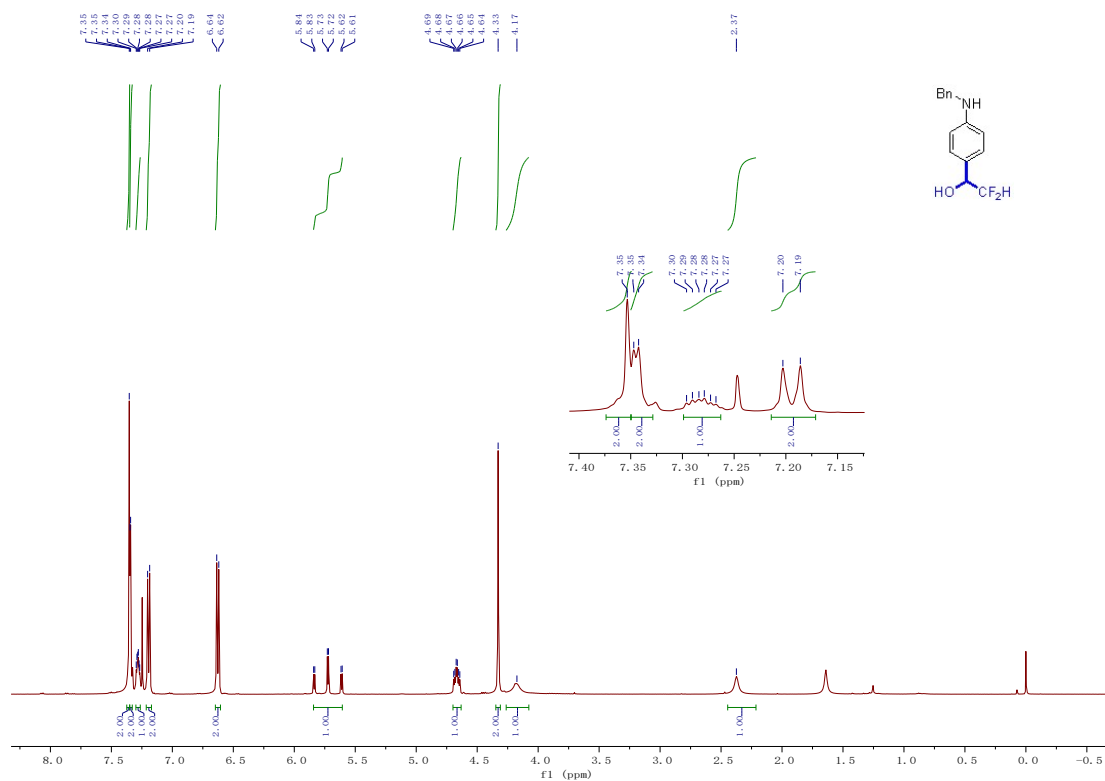

$^{13}\text{C}$  NMR (125 MHz, Chloroform-*d*) spectra of **5k**

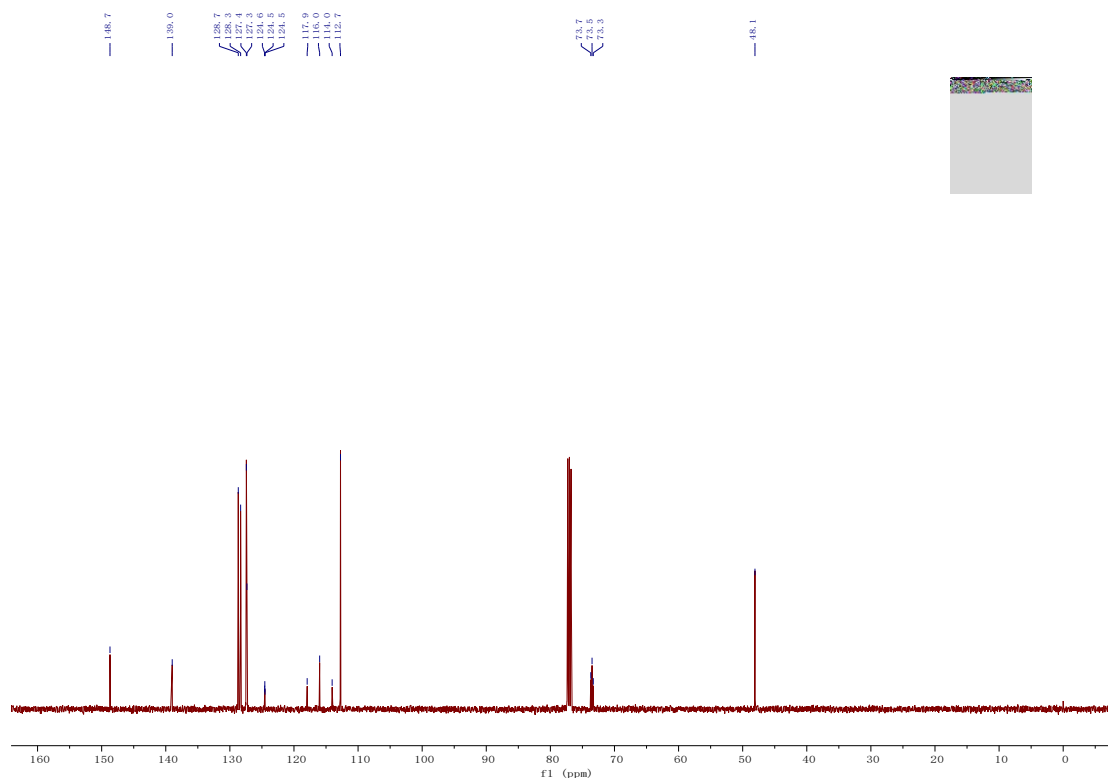

$^{19}\text{F}$  NMR (470 MHz, Chloroform-*d*) spectra of **5k**

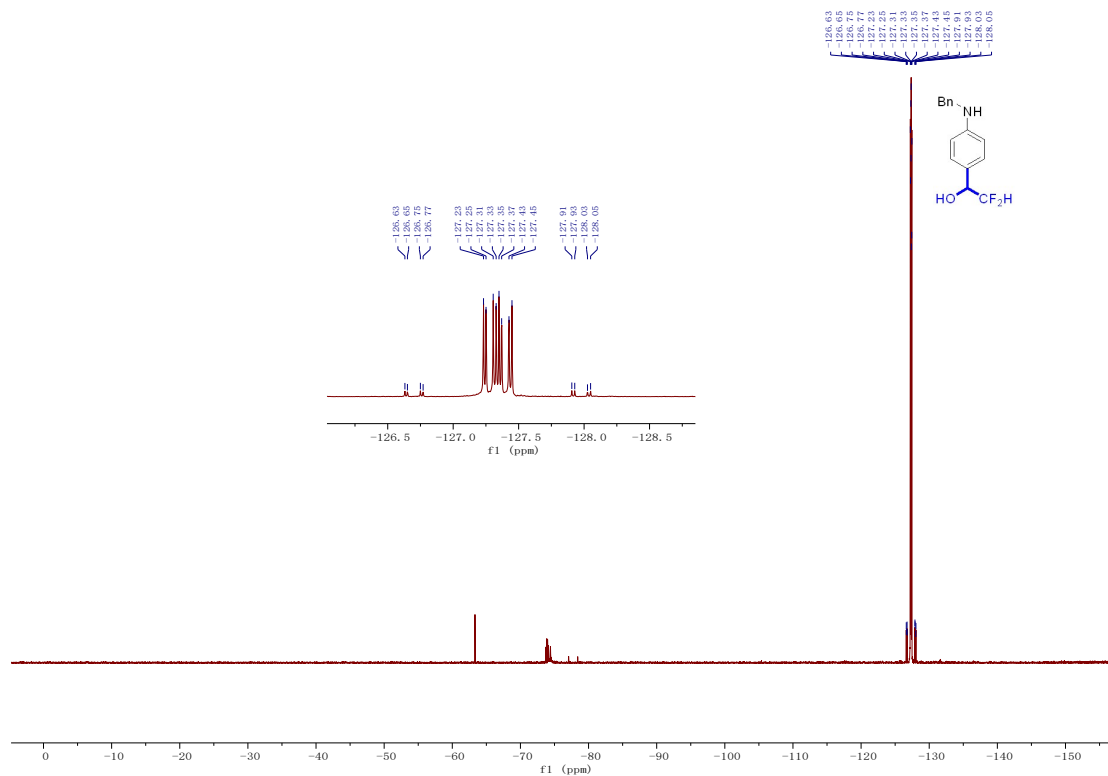

$^1\text{H}$  NMR (500 MHz, Methanol- $d_4$ ) spectra of **6a**

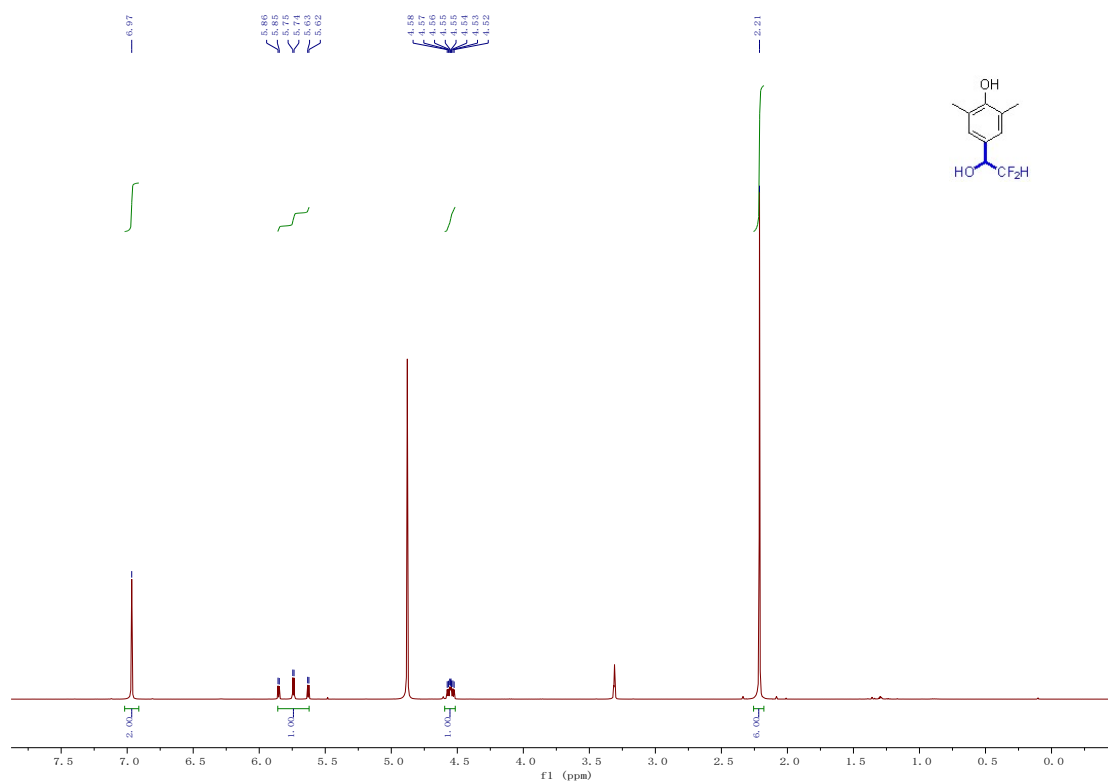

$^{13}\text{C}$  NMR (125 MHz, Methanol- $d_4$ ) spectra of **6a**

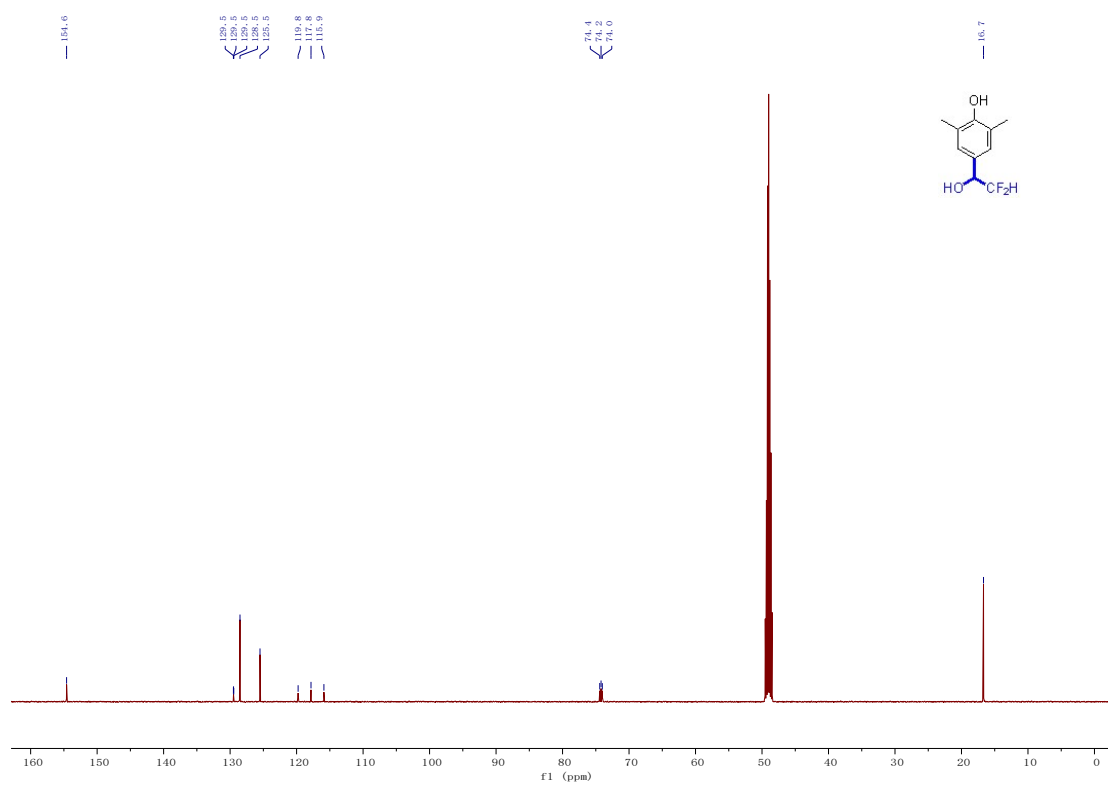

<sup>19</sup>F NMR (470 MHz, Methanol-*d*<sub>4</sub>) spectra of **6a**

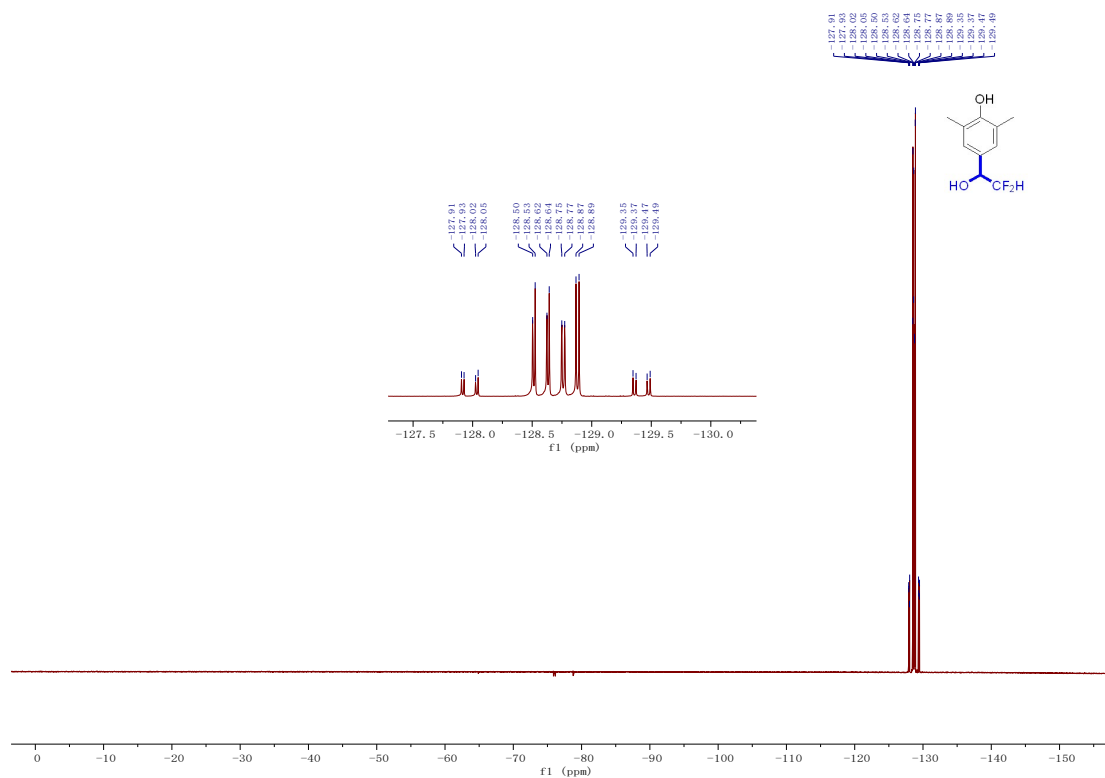

<sup>1</sup>H NMR (500 MHz, DMSO-*d*<sub>6</sub>) spectra of **6b**

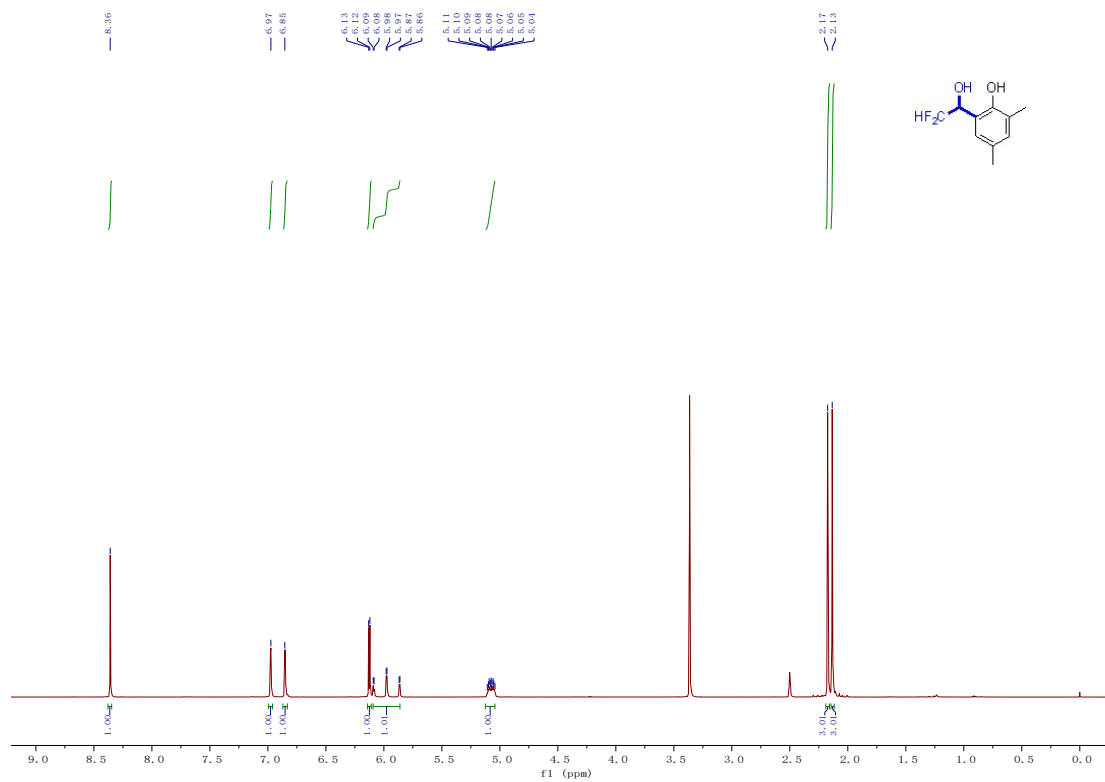

<sup>13</sup>C NMR (125 MHz, DMSO-*d*<sub>6</sub>) spectra of **6b**

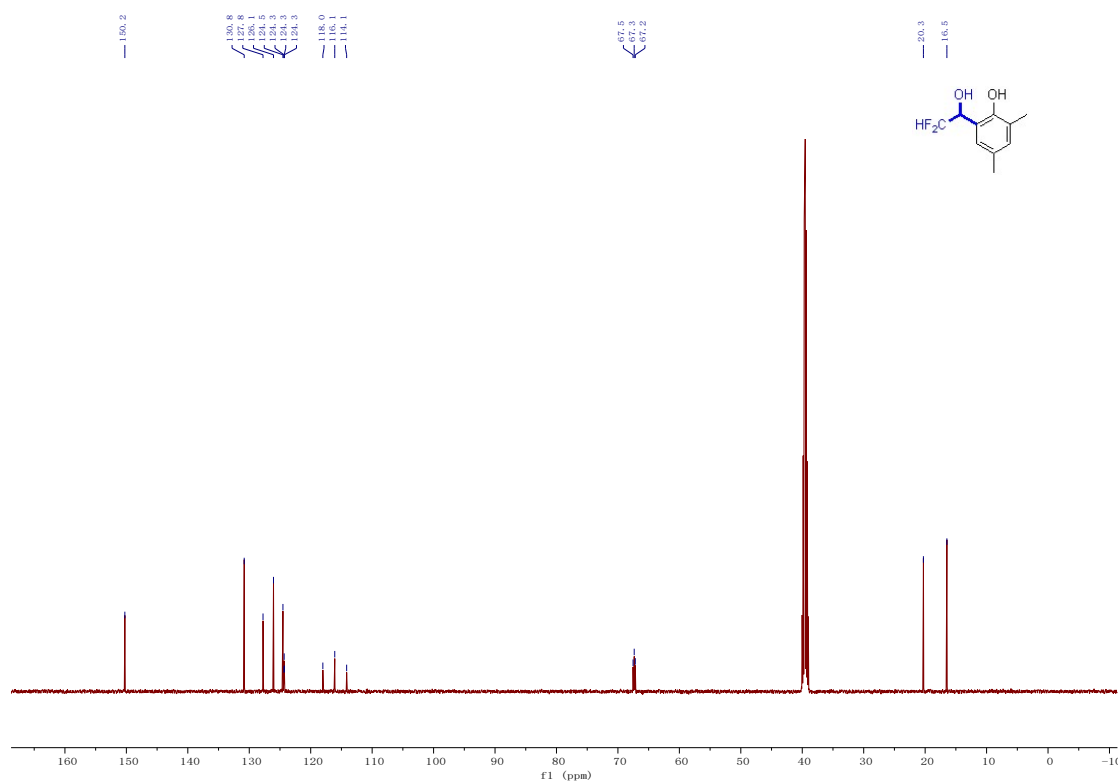

<sup>19</sup>F NMR (470 MHz, DMSO-*d*<sub>6</sub>) spectra of **6b**

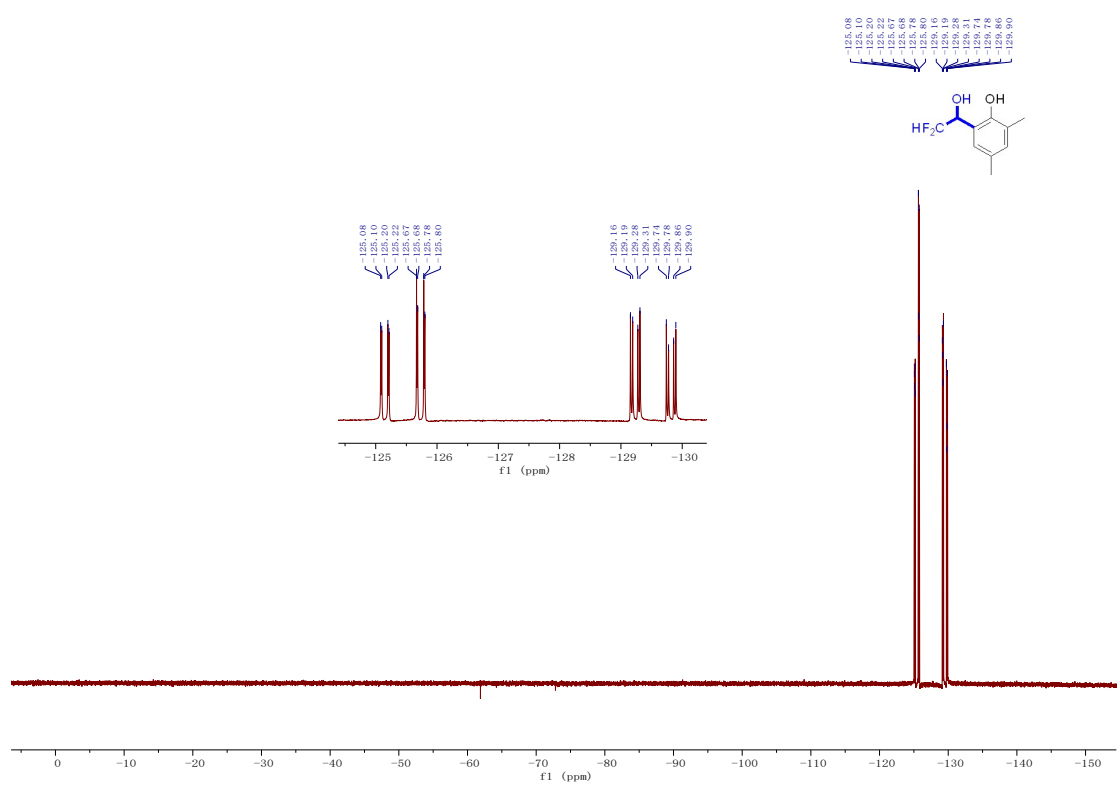

$^1\text{H}$  NMR (500 MHz, Chloroform-*d*) spectra of **6c**

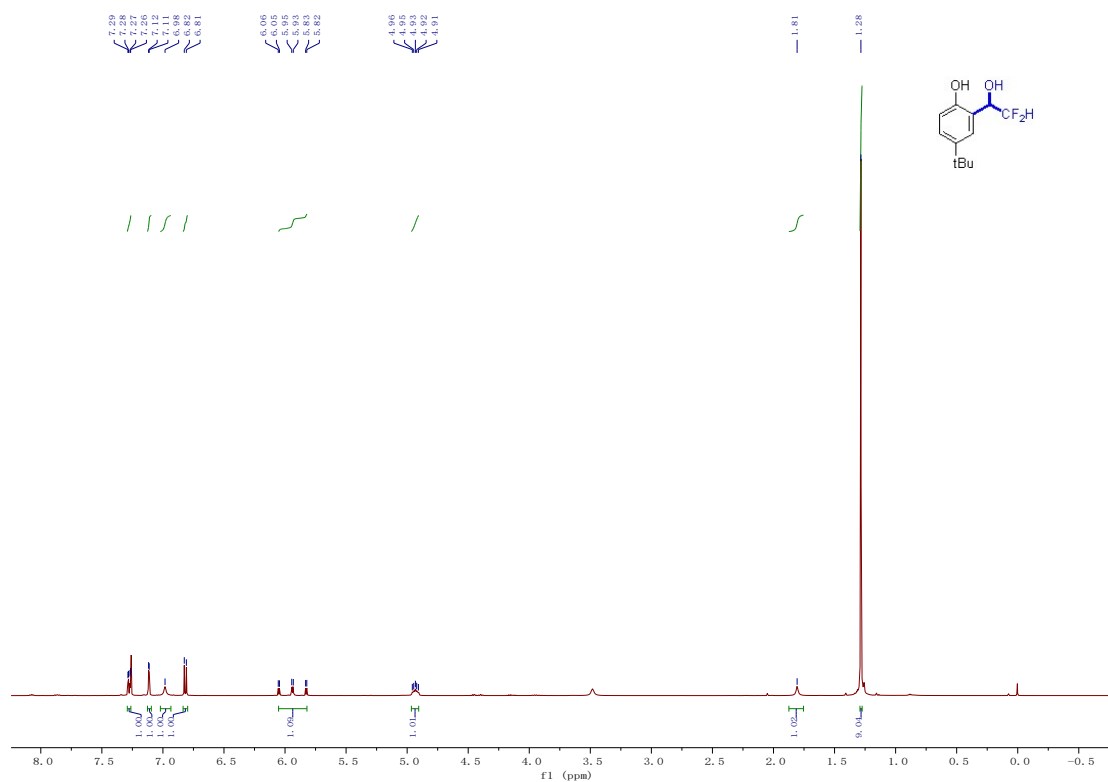

$^{13}\text{C}$  NMR (125 MHz, Chloroform-*d*) spectra of **6c**

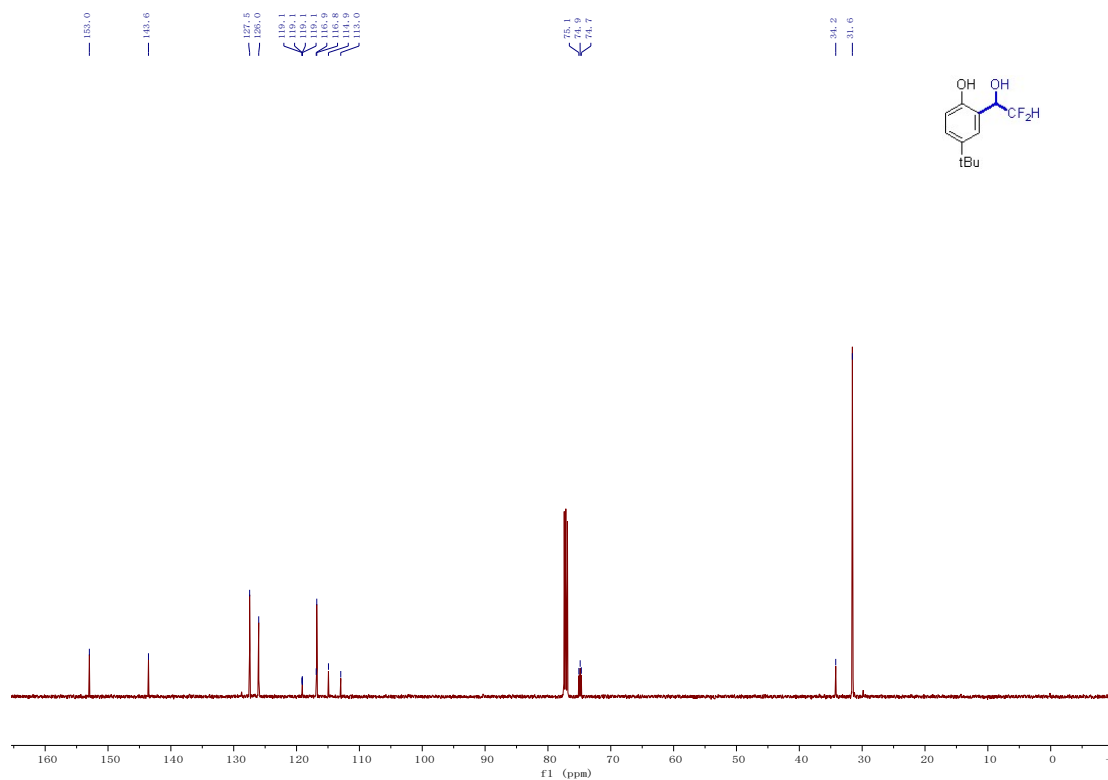



<sup>19</sup>F NMR (470 MHz, Chloroform-*d*) spectra of **6c**

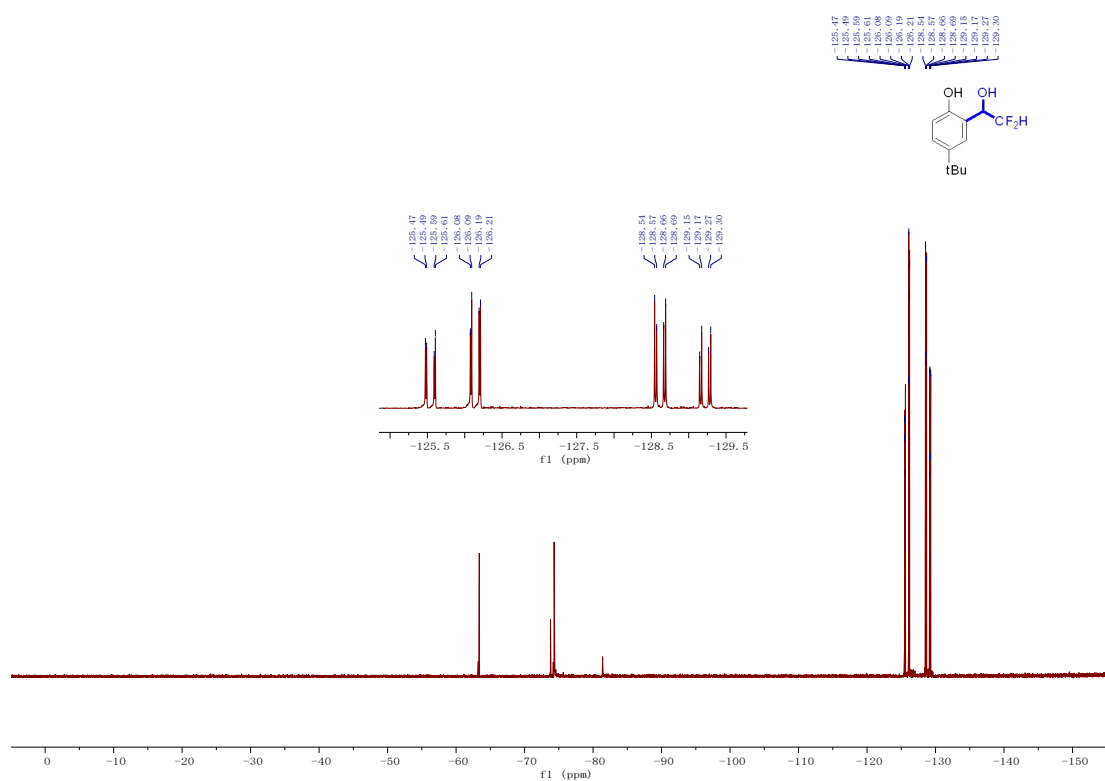

<sup>1</sup>H NMR (500 MHz, Chloroform-*d*) spectra of **6c'**

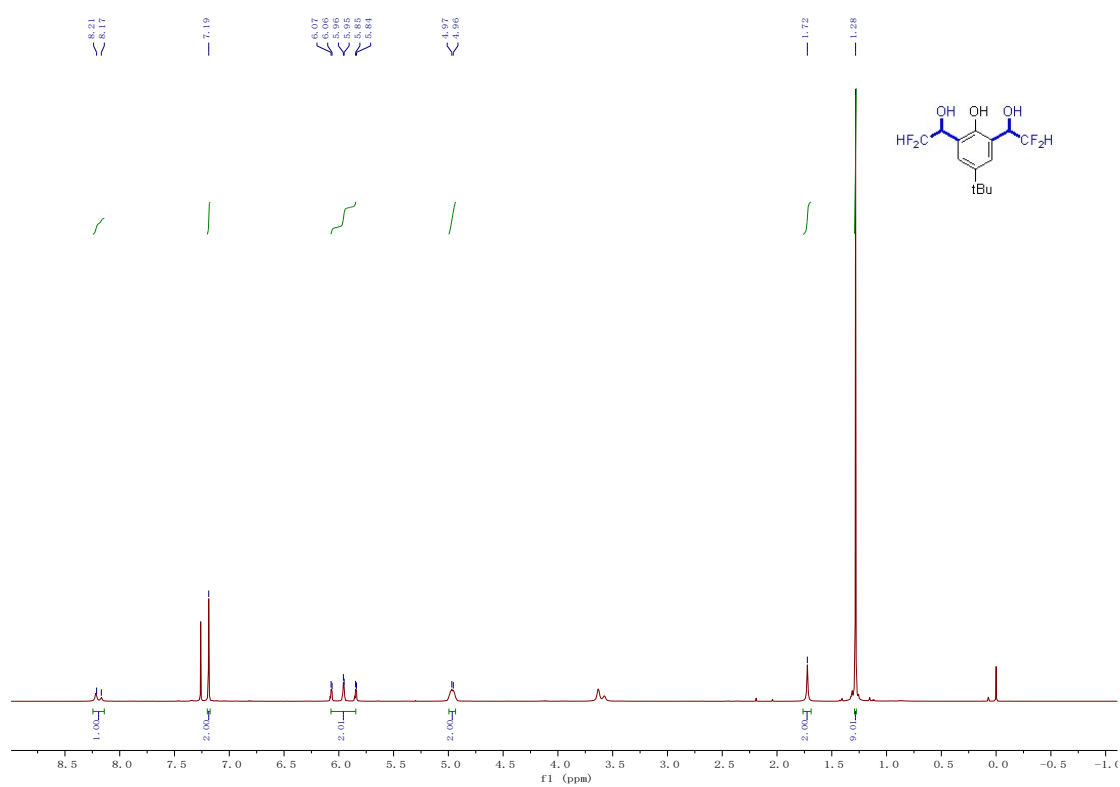

<sup>13</sup>C NMR (125 MHz, Chloroform-*d*) spectra of **6c'**

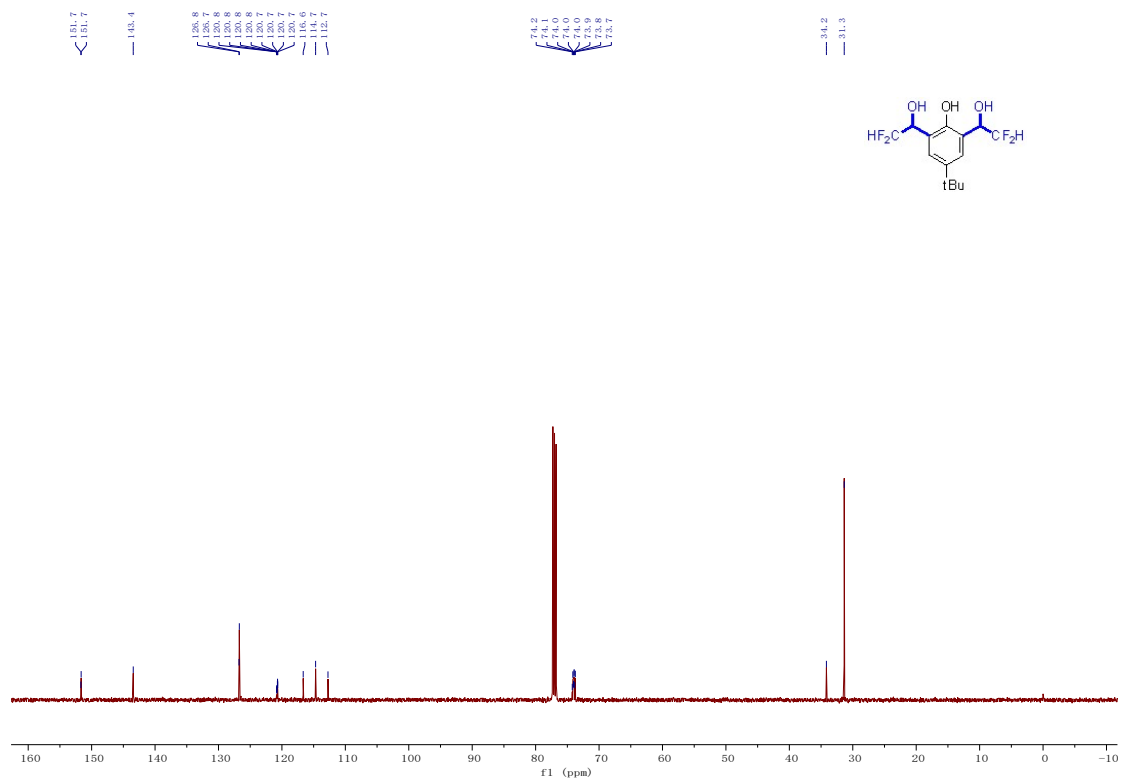

<sup>19</sup>F NMR (470 MHz, Chloroform-*d*) spectra of **6c'**

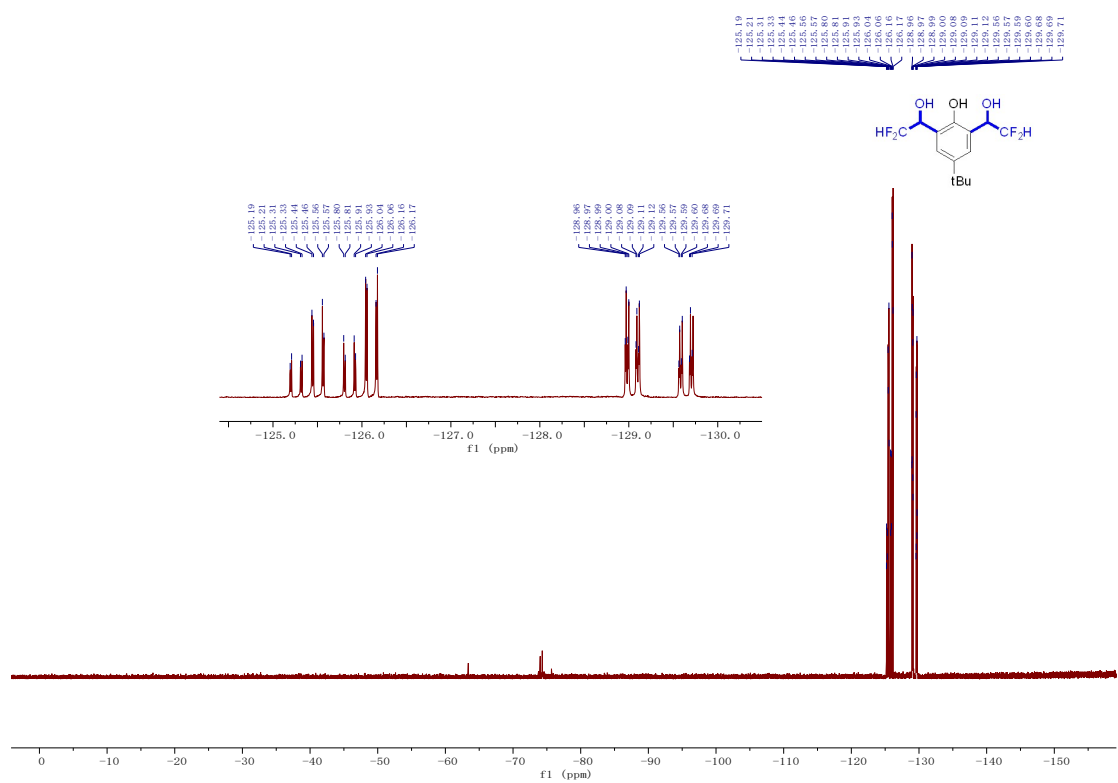

### $^1\text{H}$ NMR (500 MHz, Chloroform-*d*) spectra of **6d**

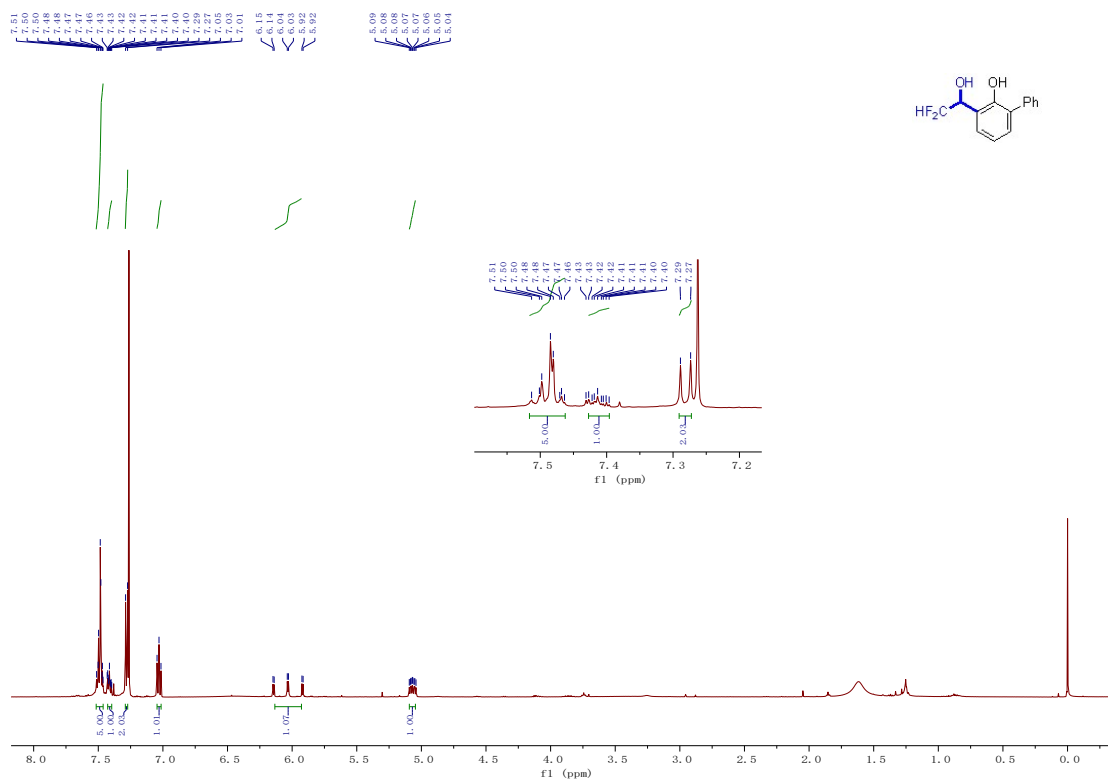

### $^{13}\text{C}$ NMR (125 MHz, Chloroform-*d*) spectra of **6d**

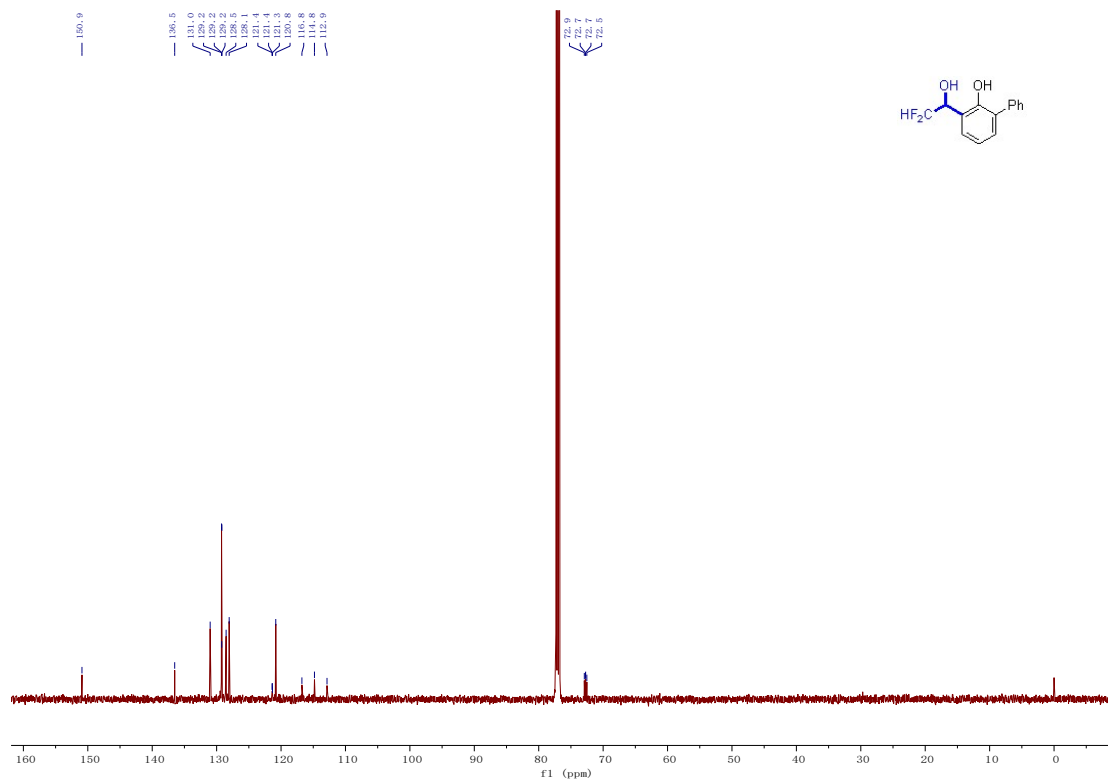

$^{19}\text{F}$  NMR (470 MHz, Chloroform-*d*) spectra of **6d**

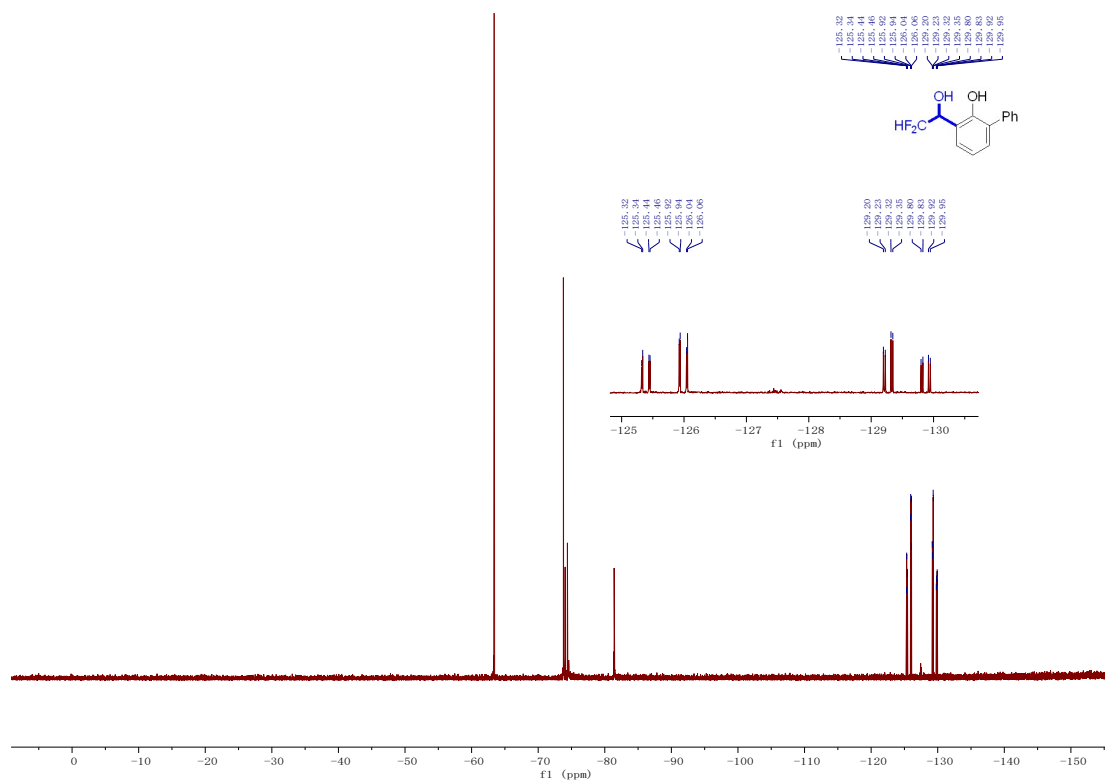

$^1\text{H}$  NMR (500 MHz, Chloroform-*d*) spectra of **6d'**

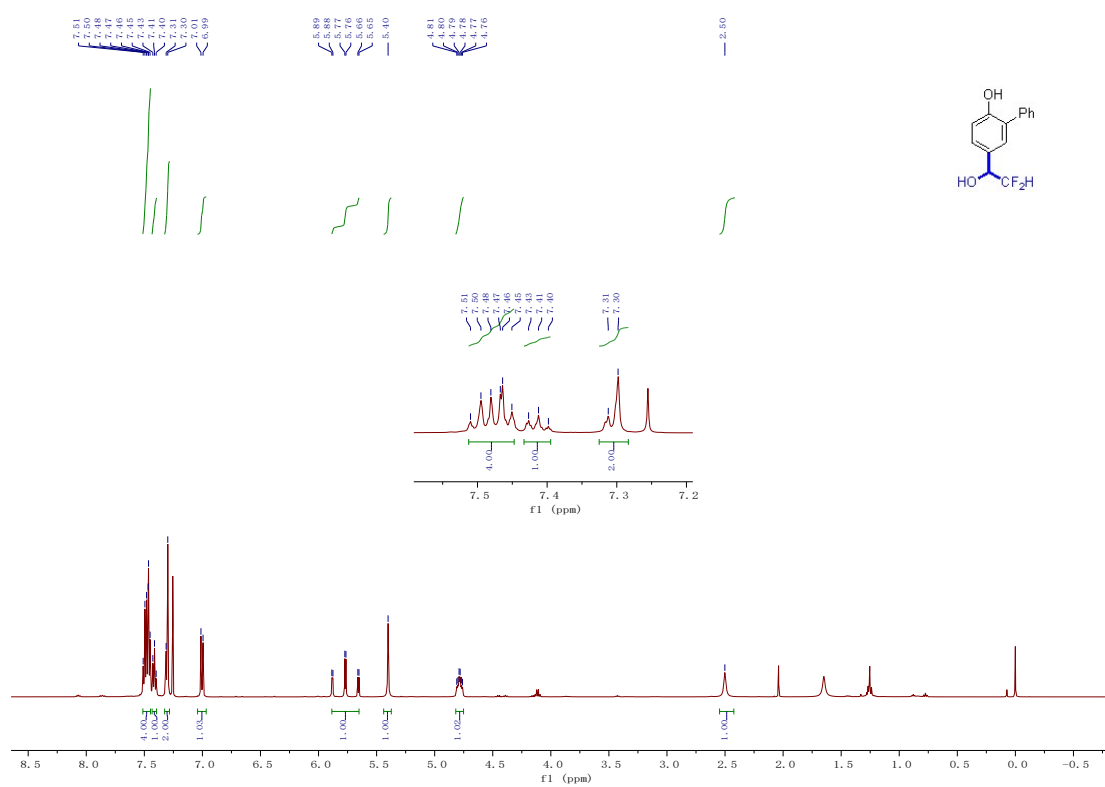

$^{13}\text{C}$  NMR (125 MHz, Chloroform-*d*) spectra of **6d'**

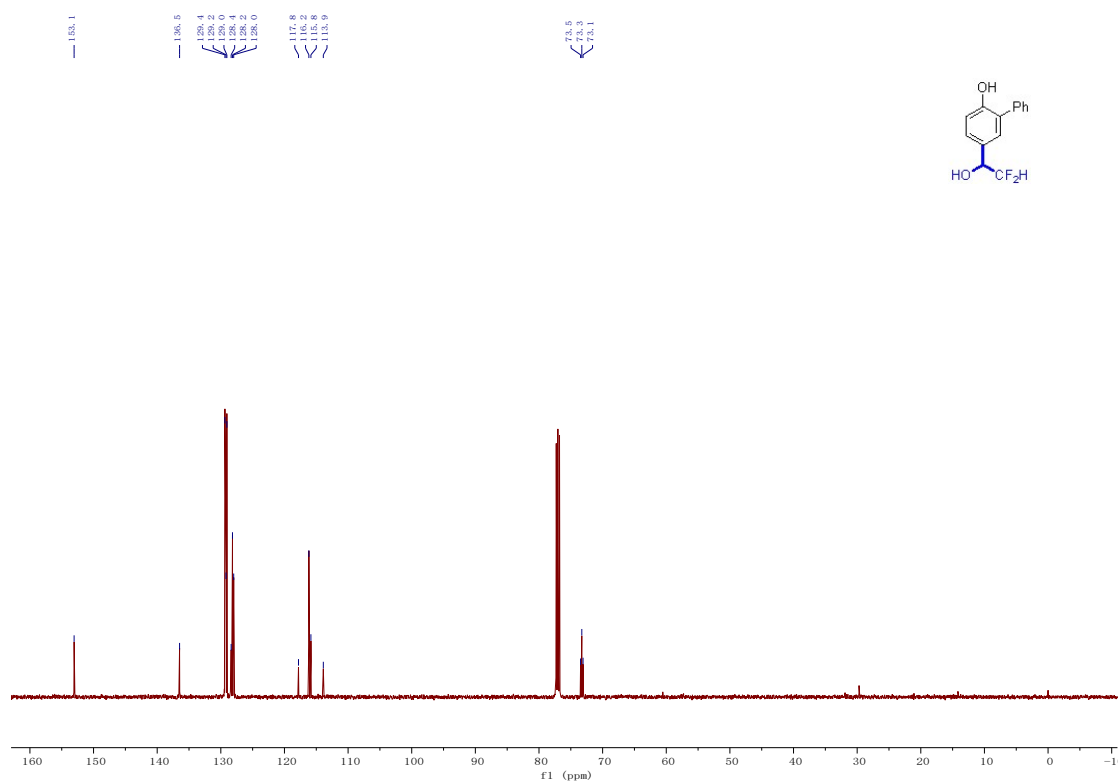

$^{19}\text{F}$  NMR (470 MHz, Chloroform-*d*) spectra of **6d'**

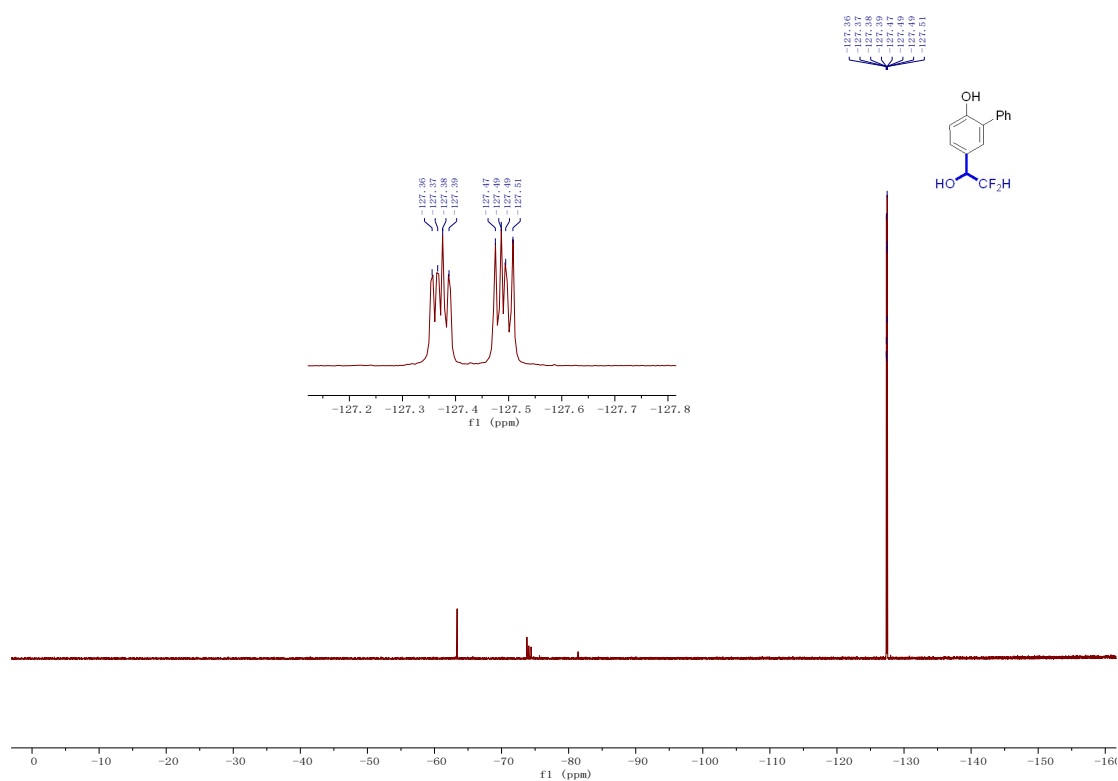

<sup>1</sup>H NMR (500 MHz, Chloroform-*d*) spectra of **6d''**

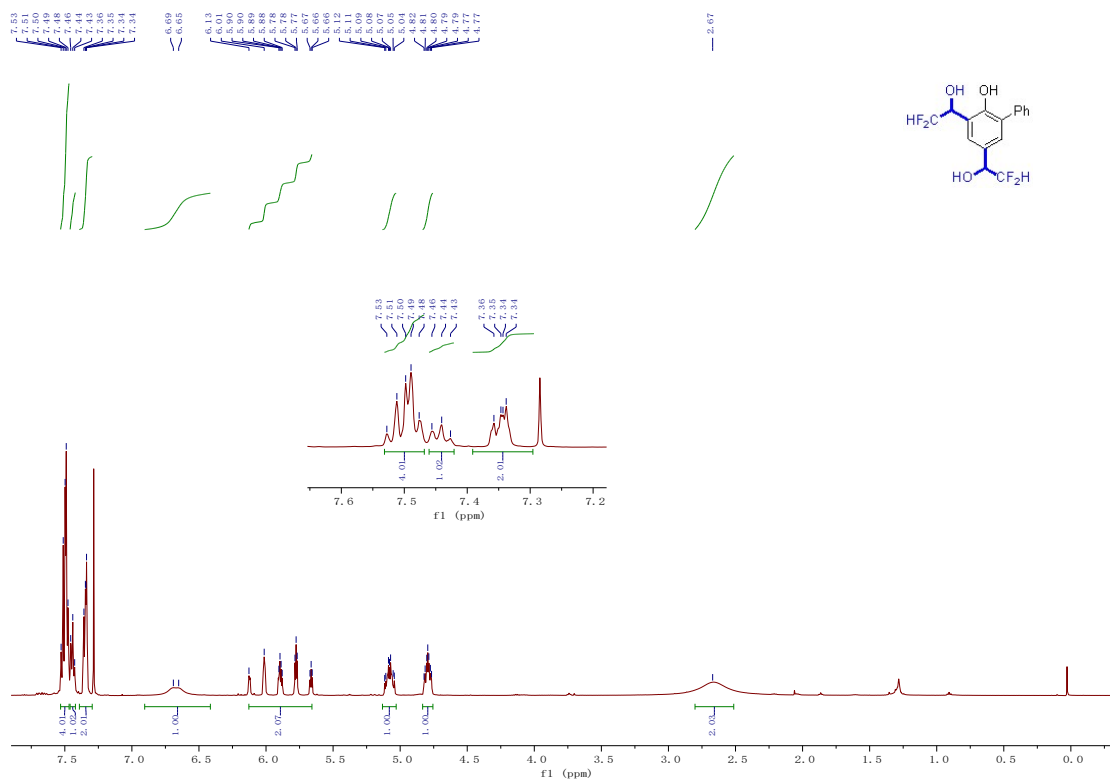

<sup>13</sup>C NMR (125 MHz, Chloroform-*d*) spectra of **6d''**

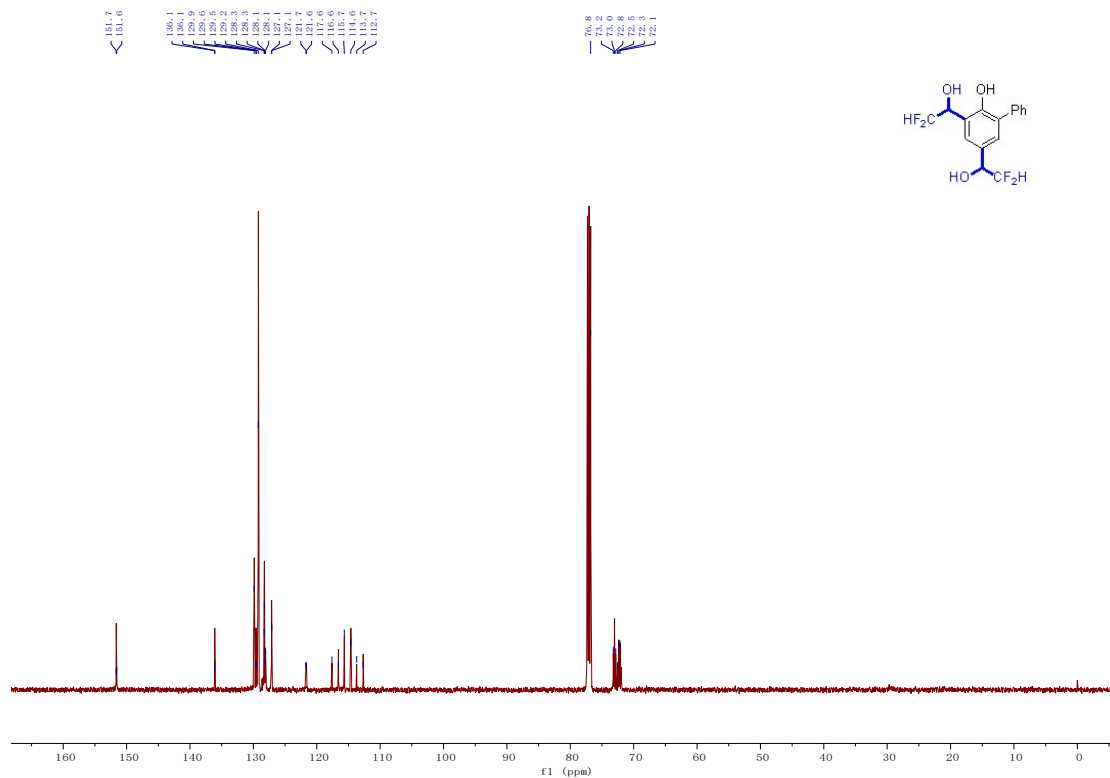

### $^{19}\text{F}$ NMR (470 MHz, Chloroform- $d$ ) spectra of **6d**'

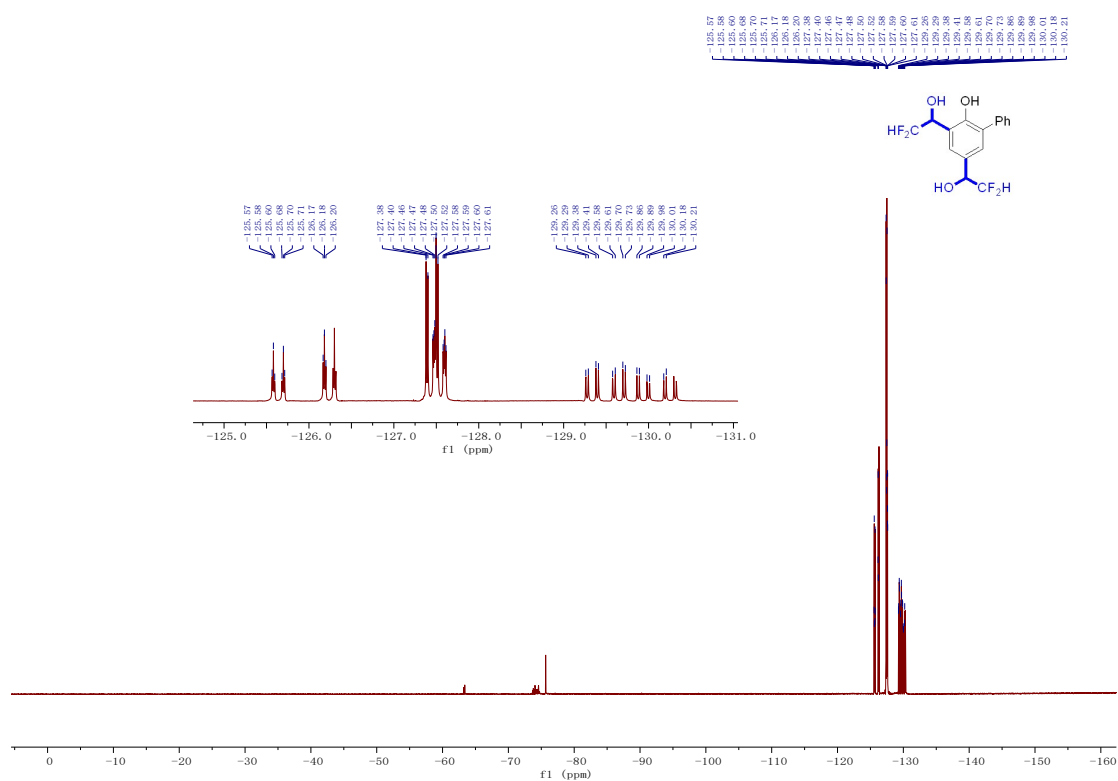

### $^1\text{H}$ NMR (500 MHz, DMSO- $d_6$ ) spectra of **6f**

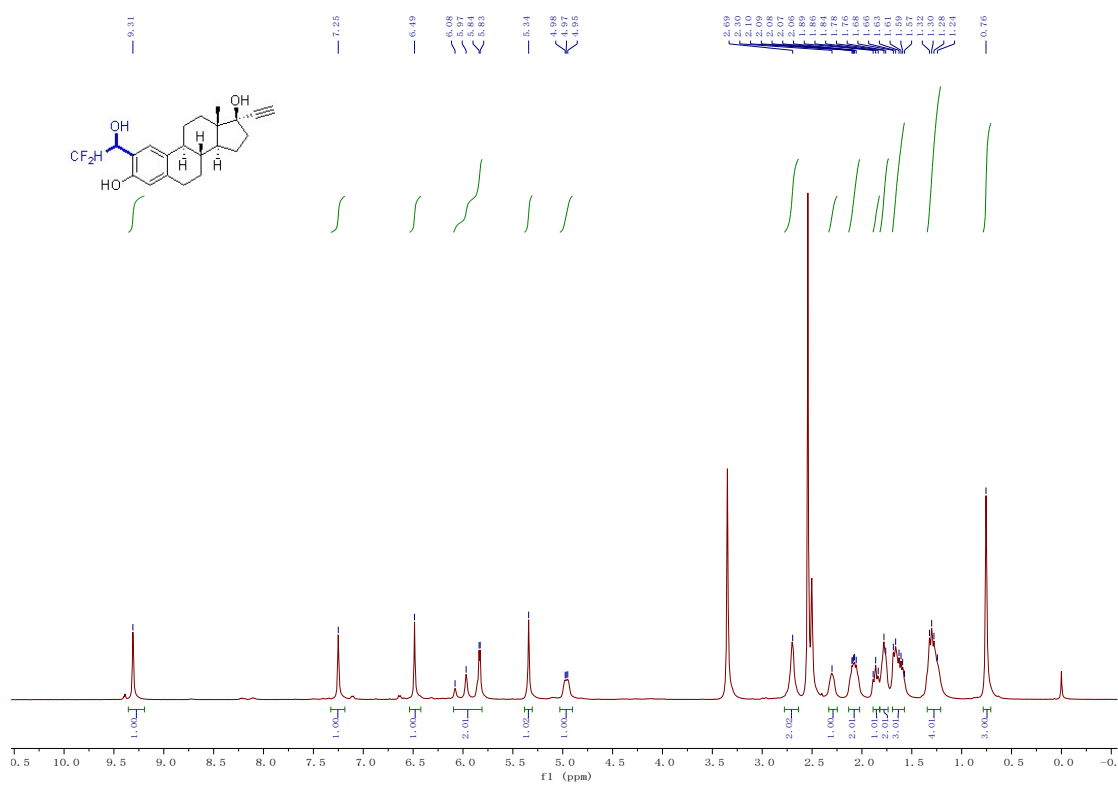

$^{13}\text{C}$  NMR (125 MHz,  $\text{DMSO-}d_6$ ) spectra of **6f**

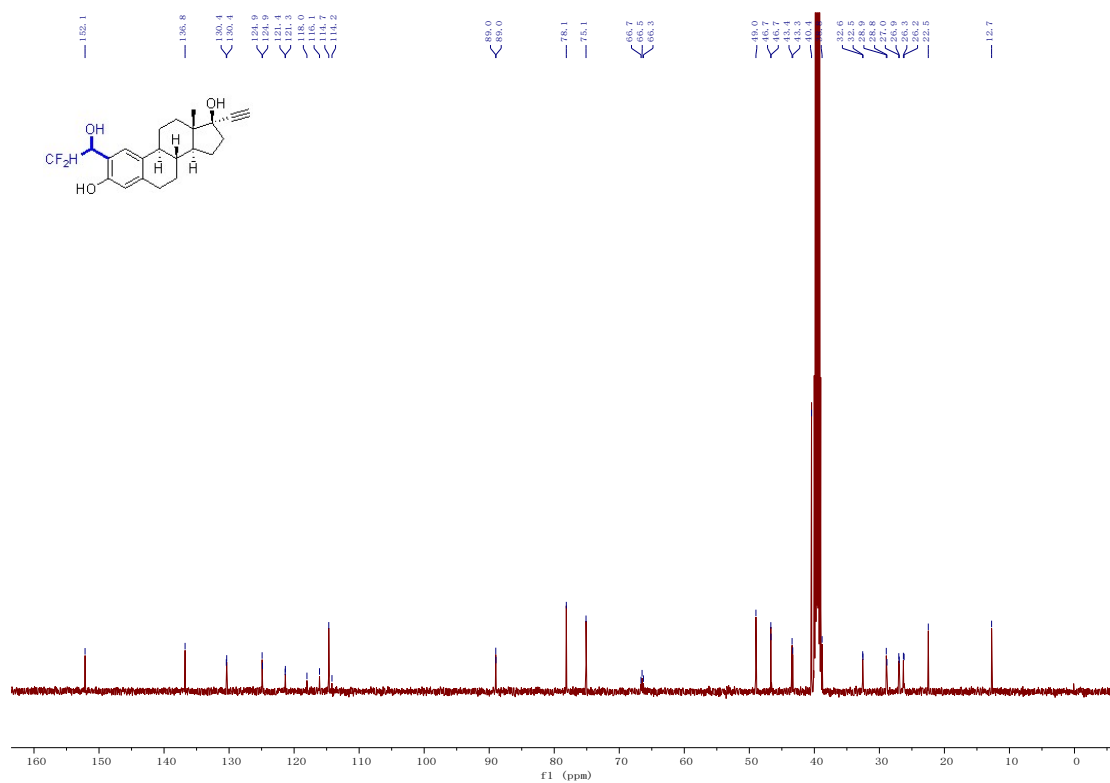

$^{19}\text{F}$  NMR (470 MHz,  $\text{DMSO-}d_6$ ) spectra of **6f**

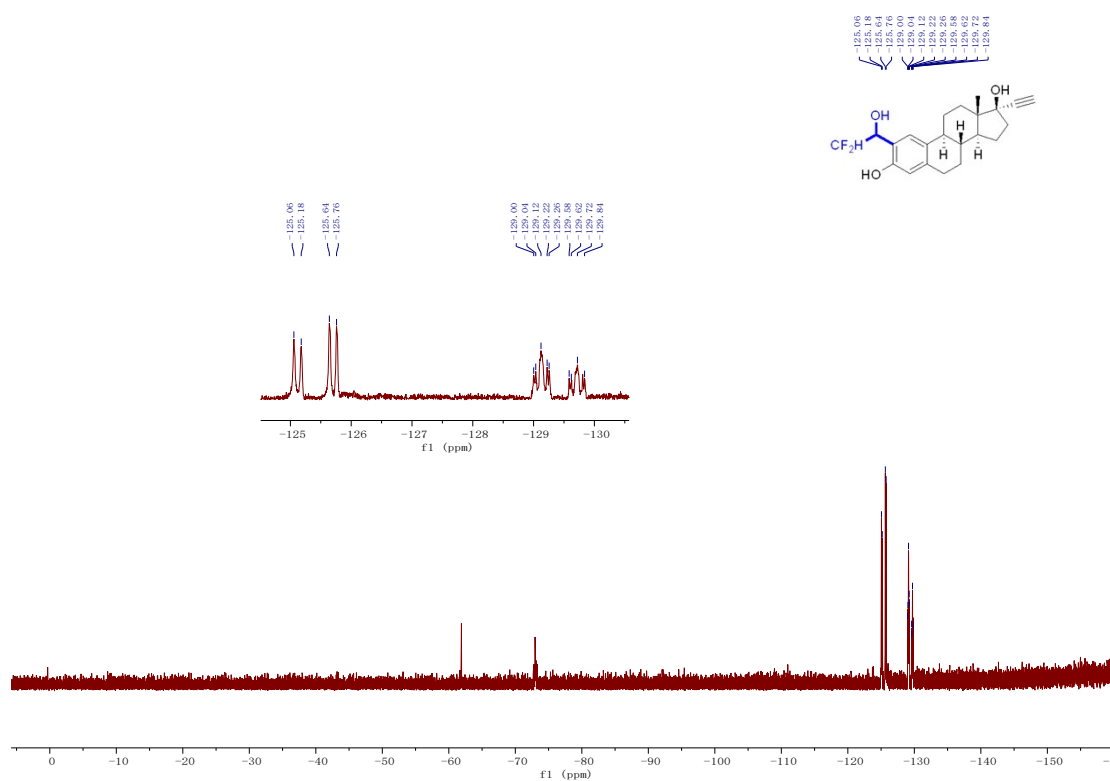



$^1\text{H}$  NMR (500 MHz,  $\text{DMSO-}d_6$ ) spectra of **6f**

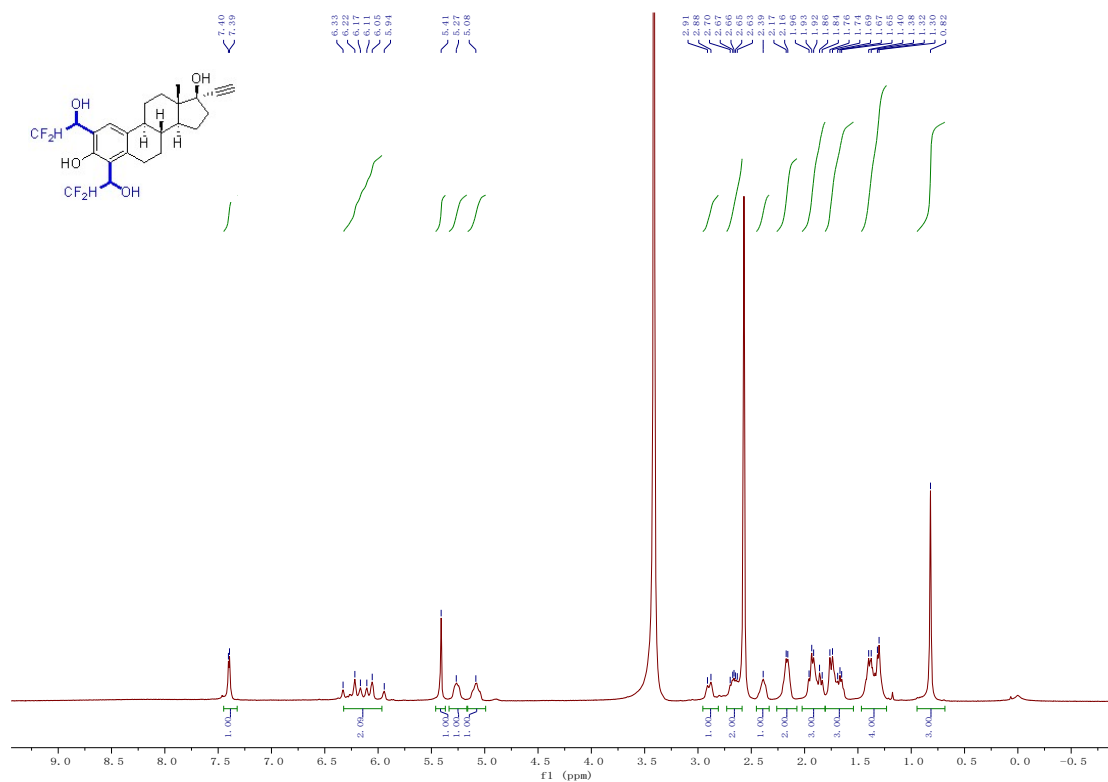

$^{13}\text{C}$  NMR (125 MHz,  $\text{DMSO-}d_6$ ) spectra of **6f**

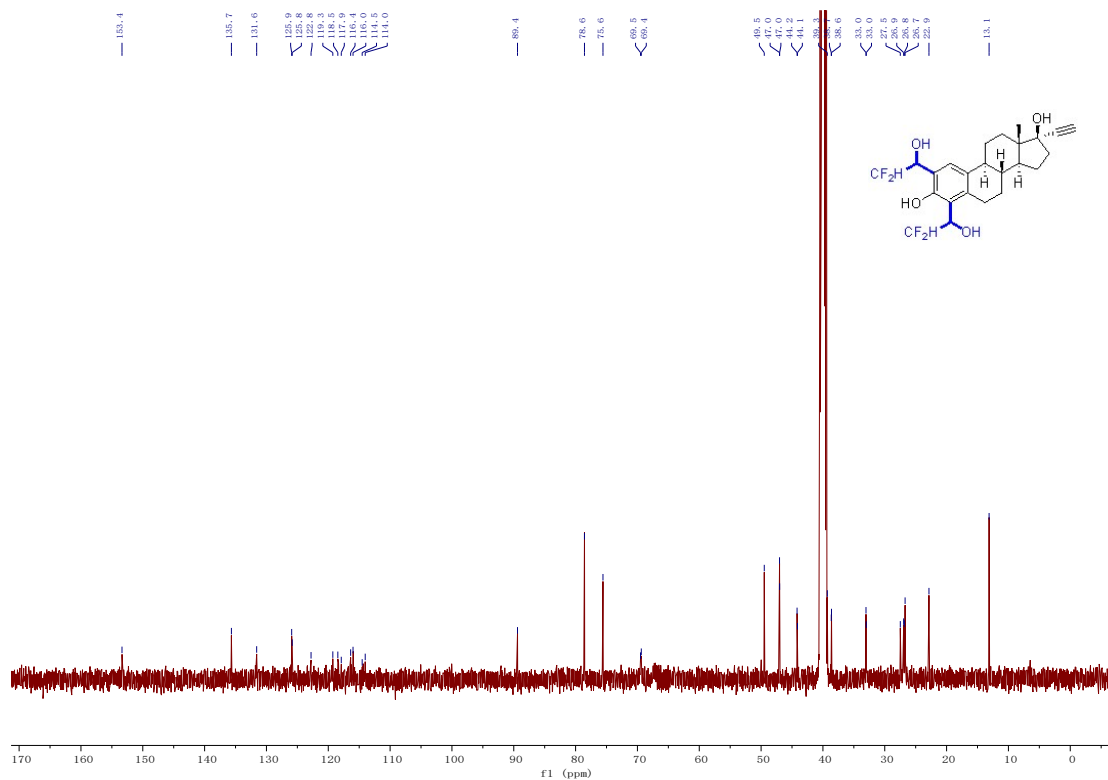

<sup>19</sup>F NMR (470 MHz, DMSO-d<sub>6</sub>) spectra of **6f**

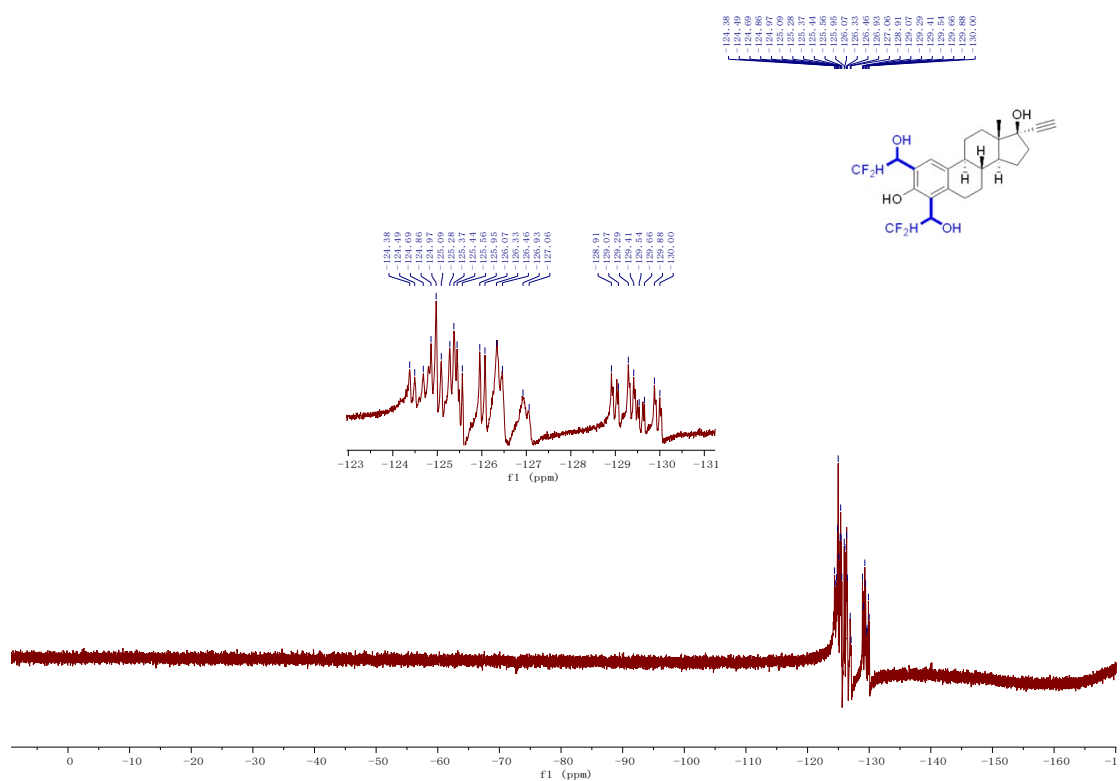

<sup>1</sup>H NMR (500 MHz, Chloroform-d) spectra of **6g**

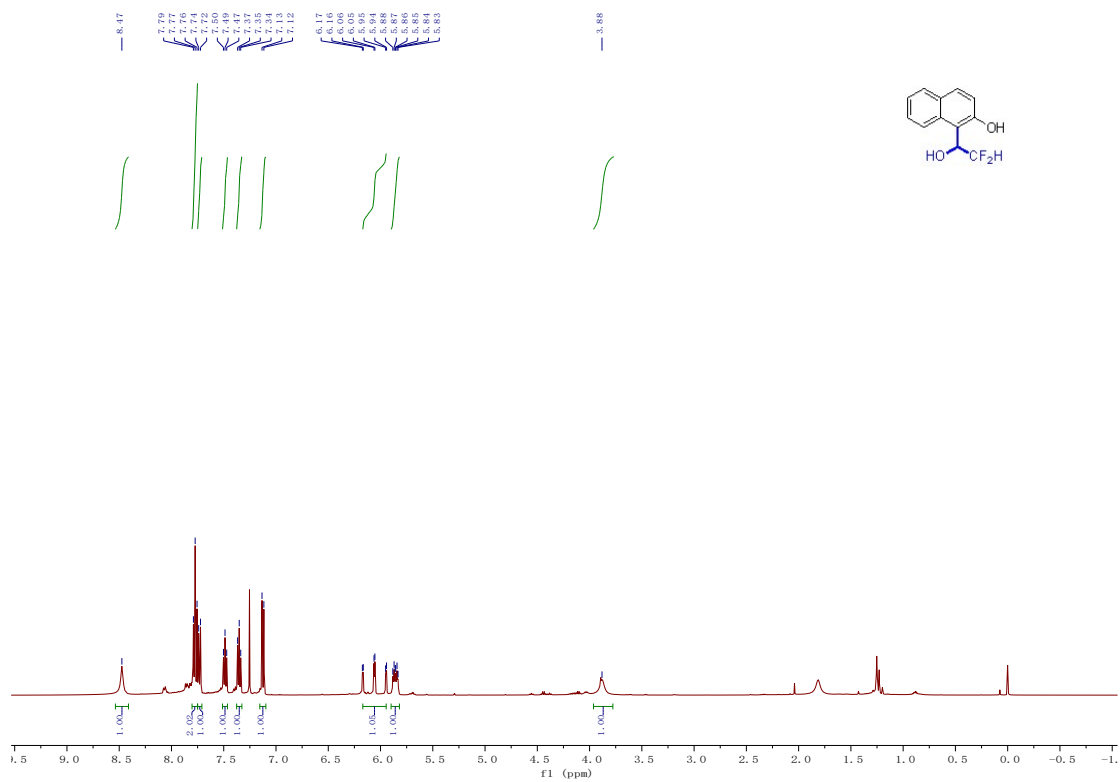

<sup>13</sup>C NMR (125 MHz, Chloroform-*d*) spectra of **6g**

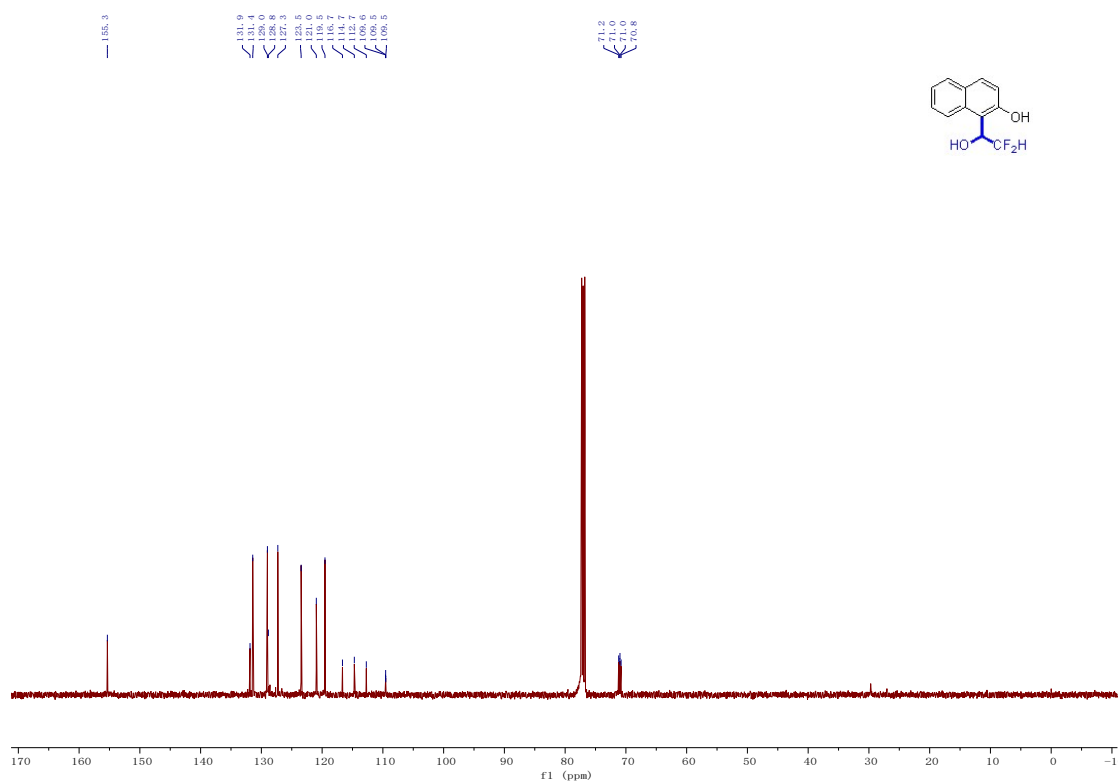

<sup>19</sup>F NMR (470 MHz, Chloroform-*d*) spectra of **6g**

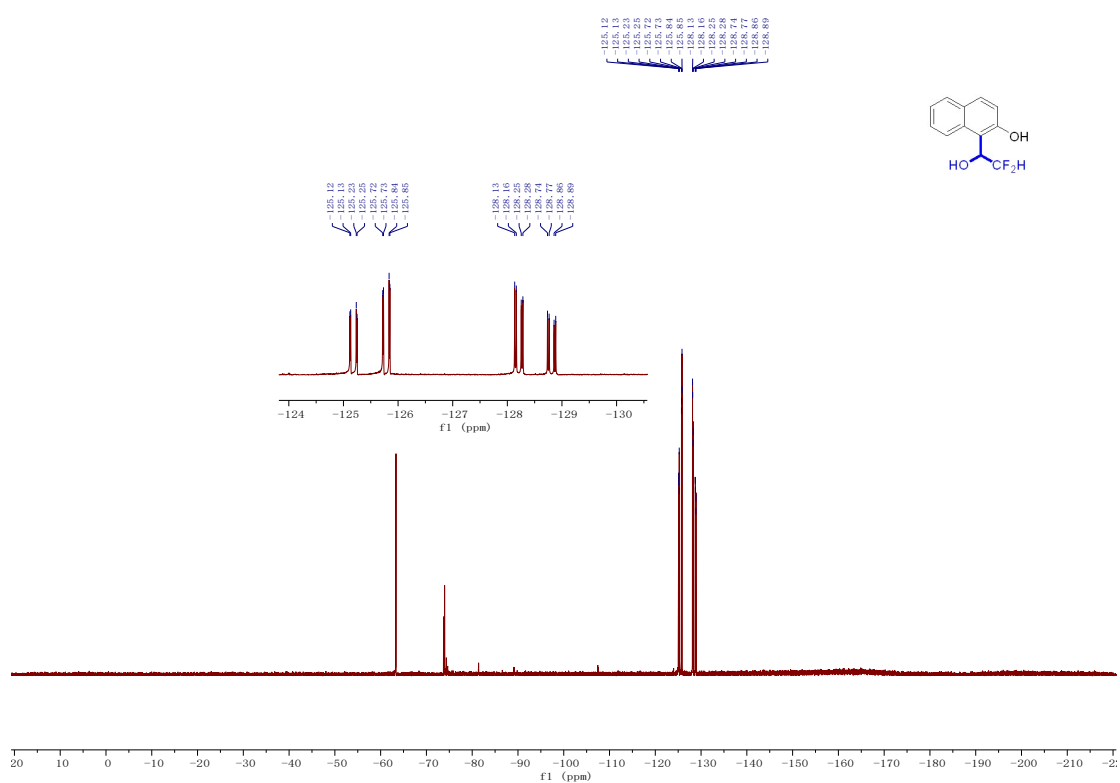

$^1\text{H}$  NMR (500 MHz,  $\text{DMSO-}d_6$ ) spectra of **6h**

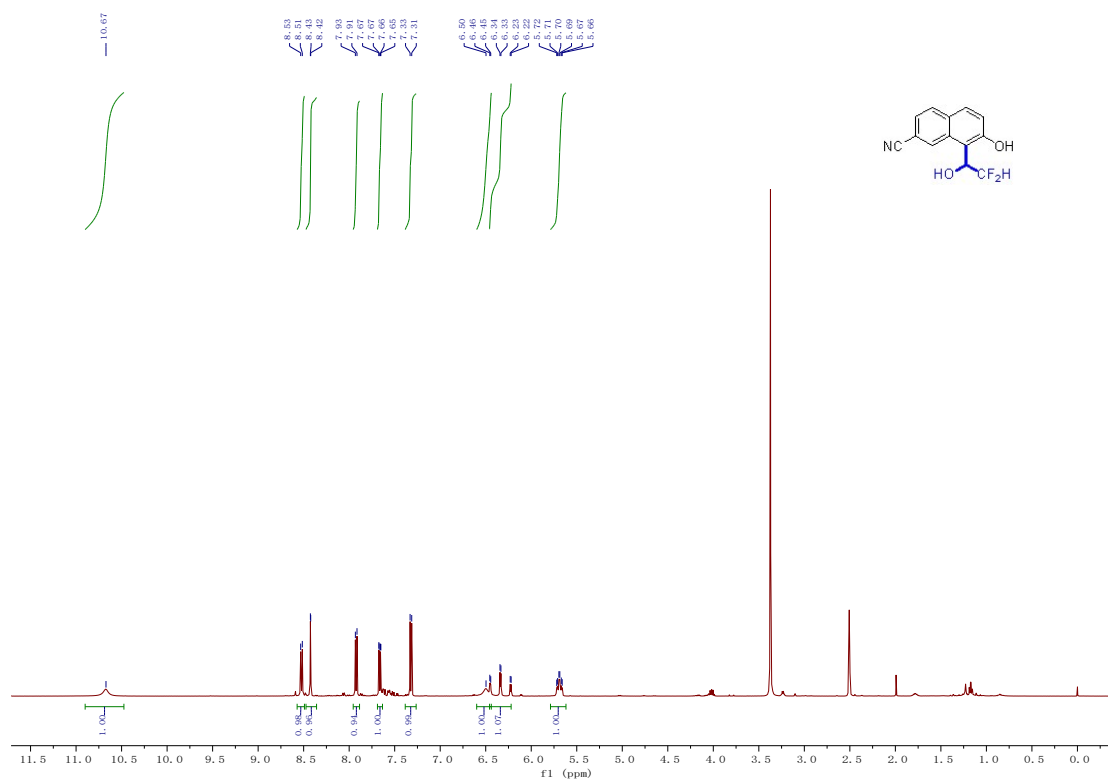

$^{13}\text{C}$  NMR (125 MHz,  $\text{DMSO-}d_6$ ) spectra of **6h**

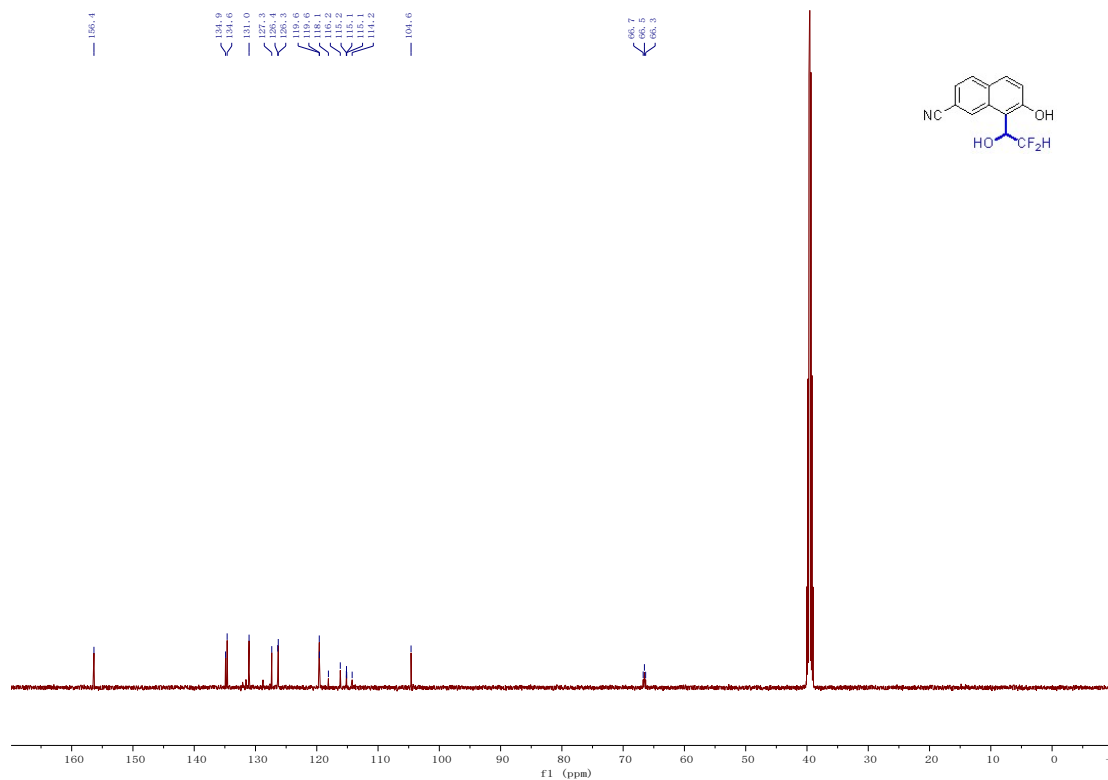

$^{19}\text{F}$  NMR (470 MHz,  $\text{DMSO-}d_6$ ) spectra of **6h**

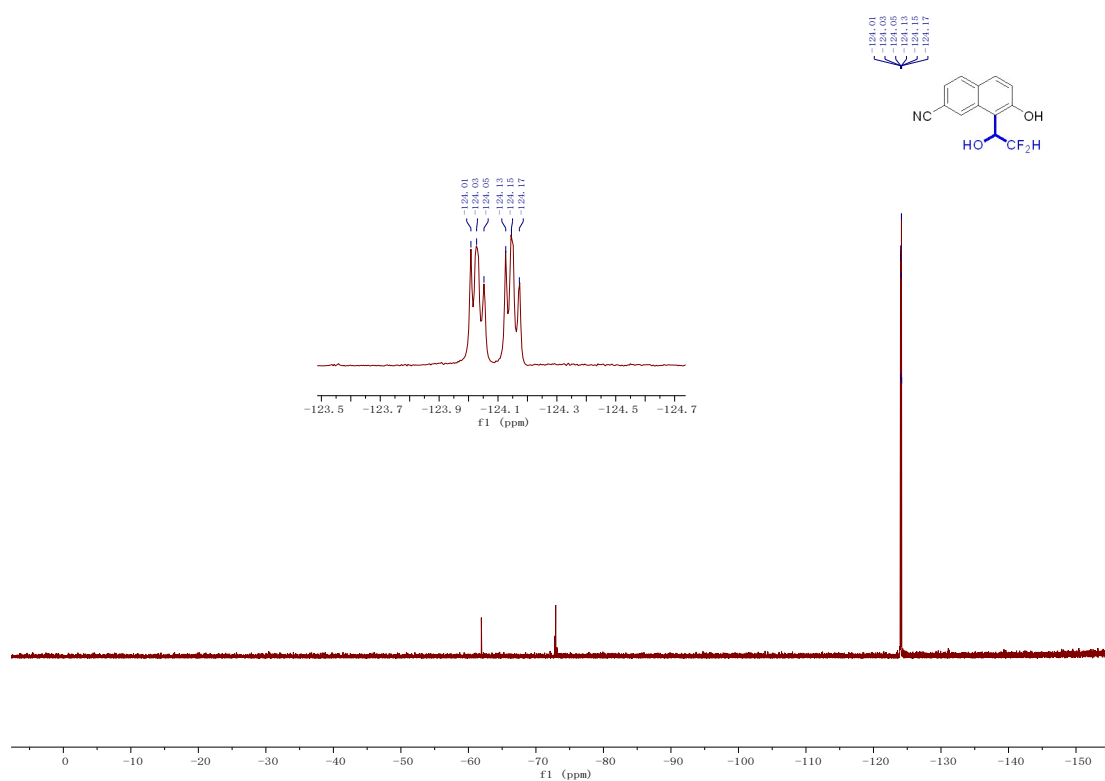

$^1\text{H}$  NMR (500 MHz,  $\text{Methanol-}d_4$ ) spectra of **8a**

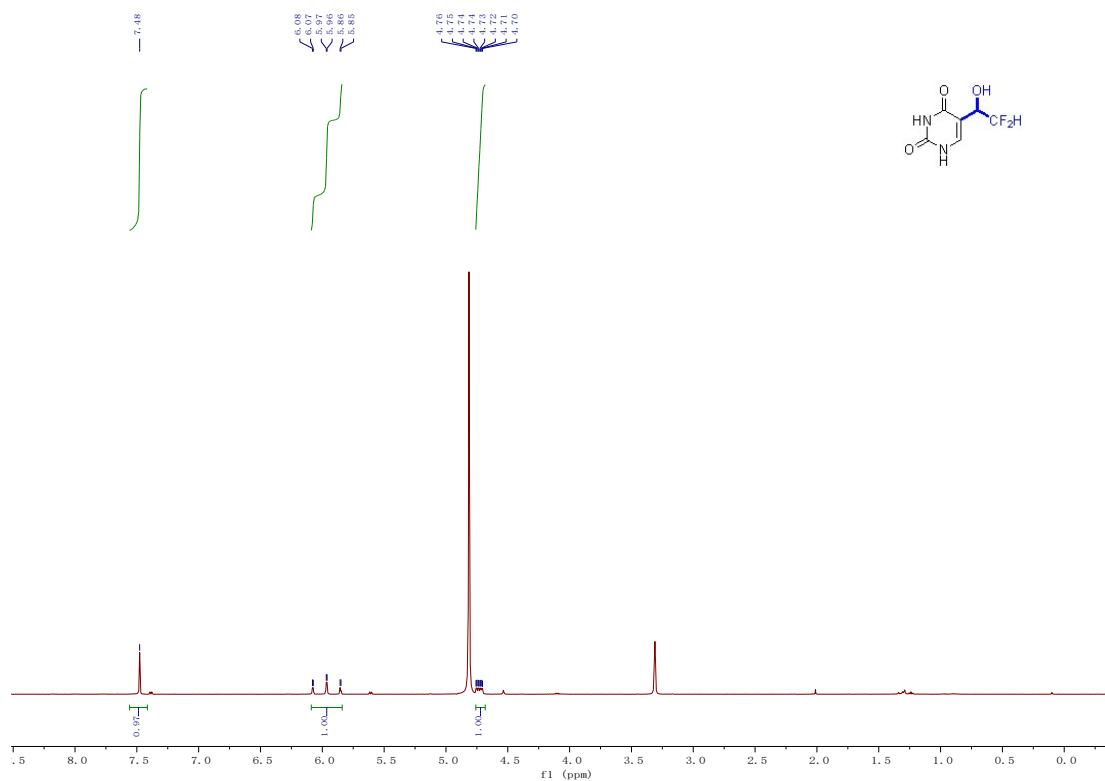

<sup>13</sup>C NMR (125 MHz, Methanol-*d*<sub>4</sub>) spectra of **8a**

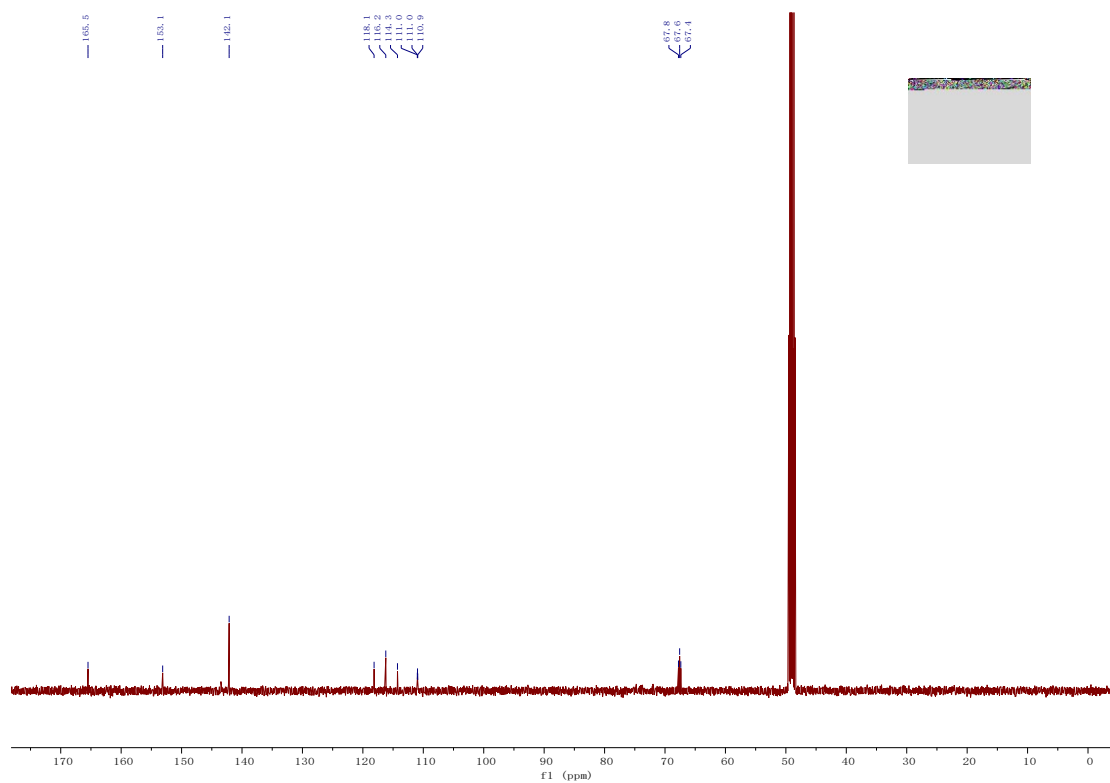

<sup>19</sup>F NMR (470 MHz, Methanol-*d*<sub>4</sub>) spectra of **8a**

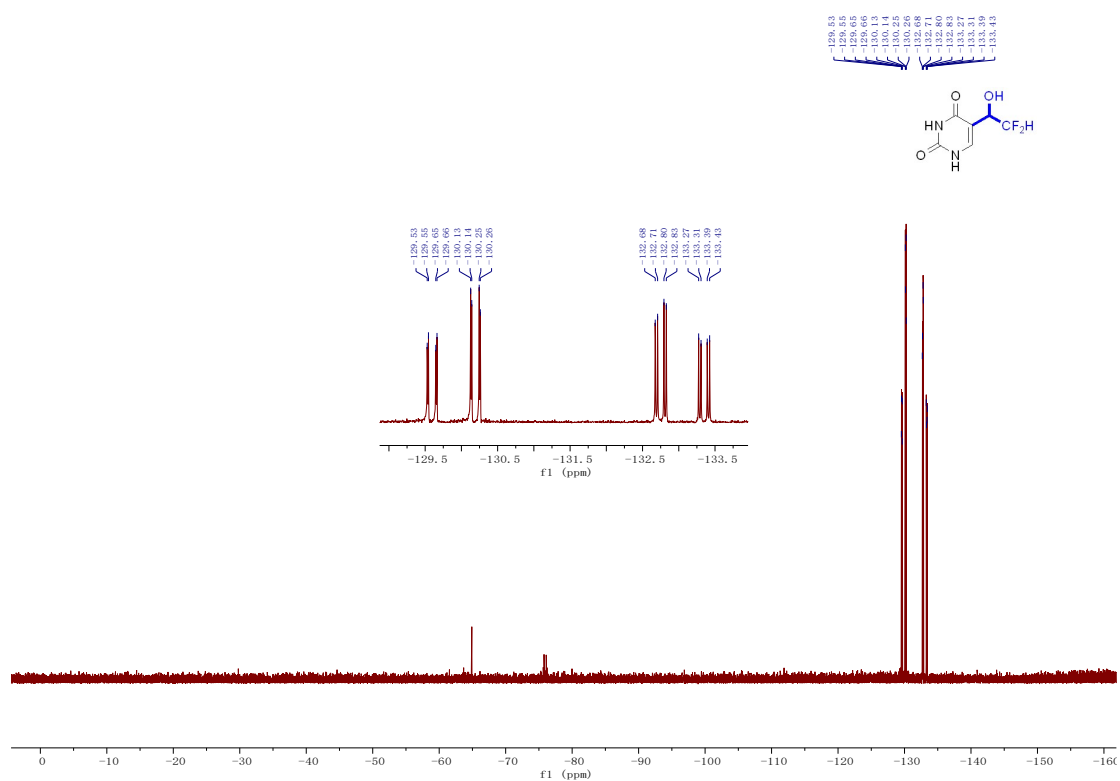

$^1\text{H}$  NMR (500 MHz, Chloroform-*d*) spectra of **8b**

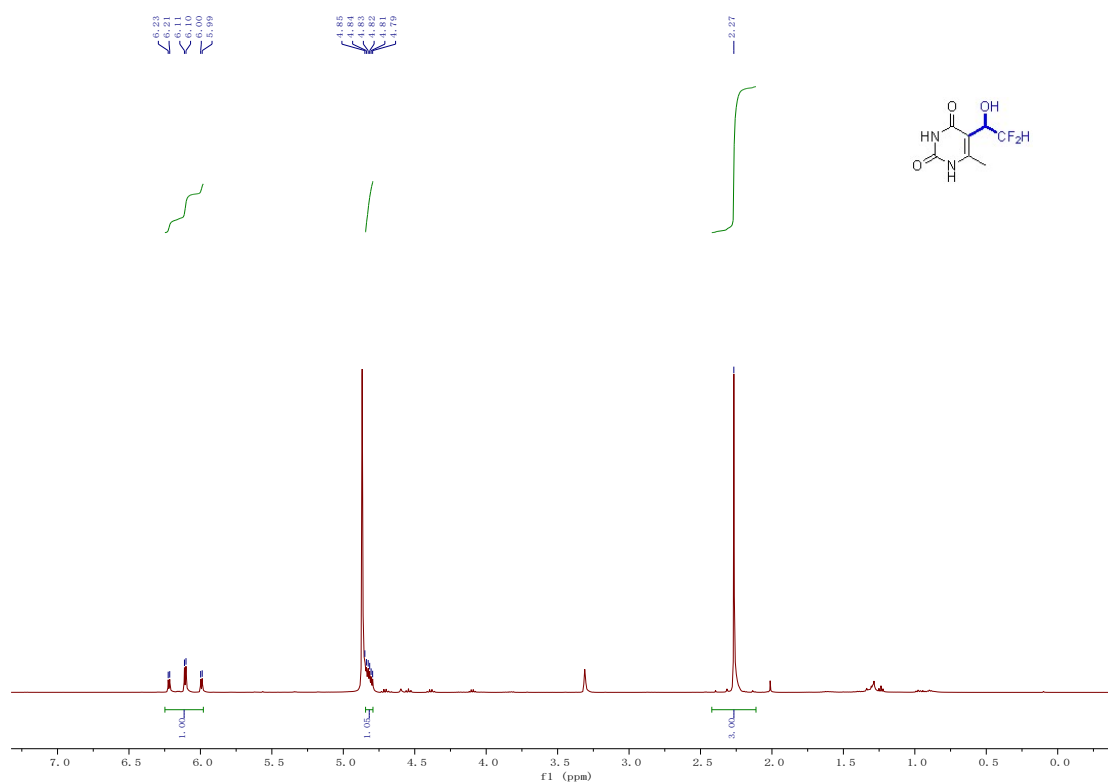

$^{13}\text{C}$  NMR (125 MHz, Chloroform-*d*) spectra of **8b**

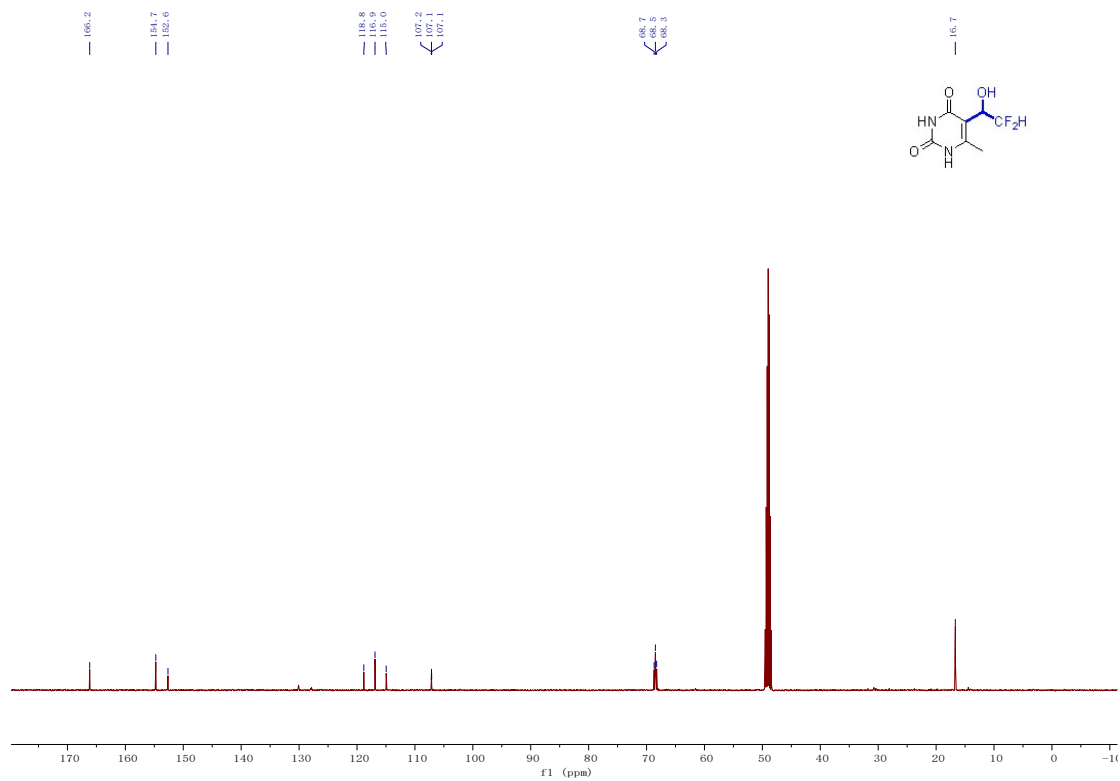

$^{19}\text{F}$  NMR (470 MHz, Chloroform-*d*) spectra of **8b**

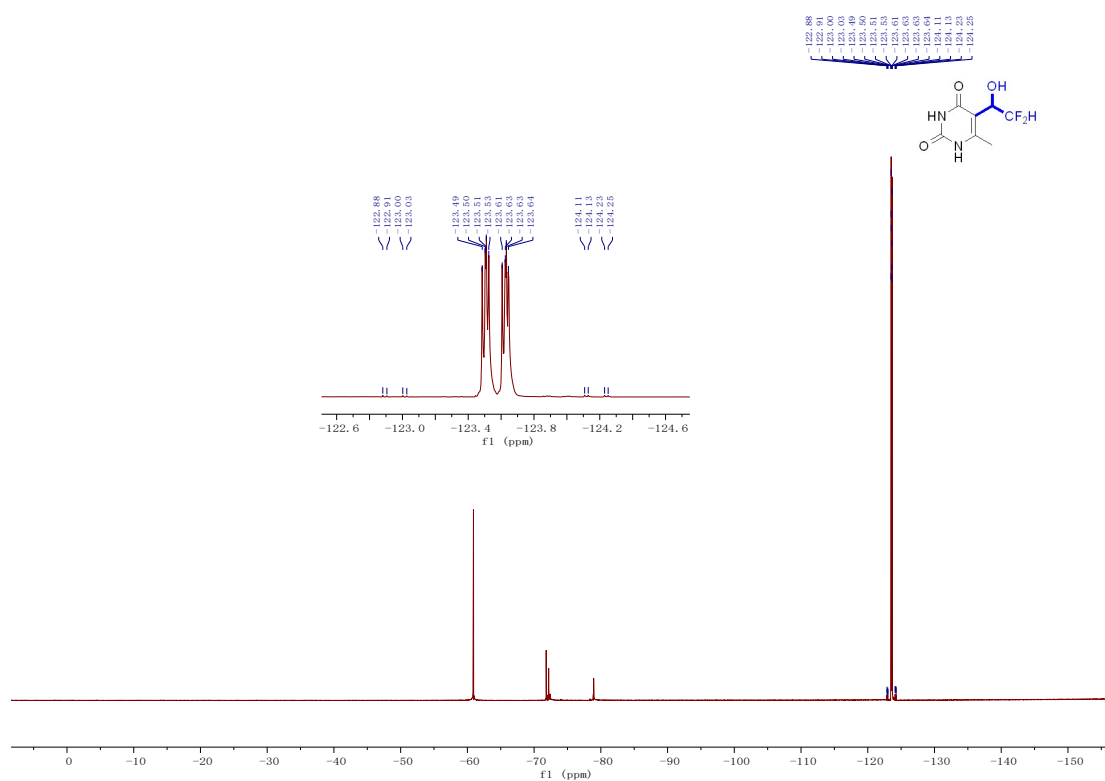

$^1\text{H}$  NMR (500 MHz, Chloroform-*d*) spectra of **9**

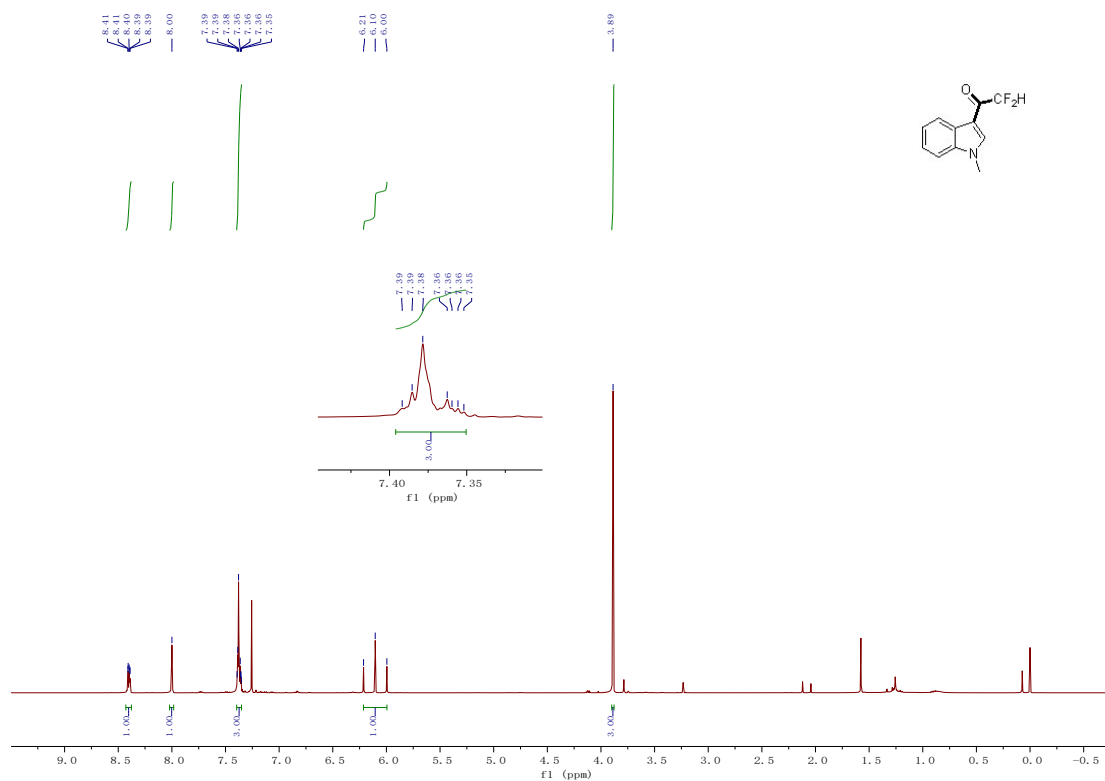



<sup>13</sup>C NMR (125 MHz, Chloroform-*d*) spectra of **9**

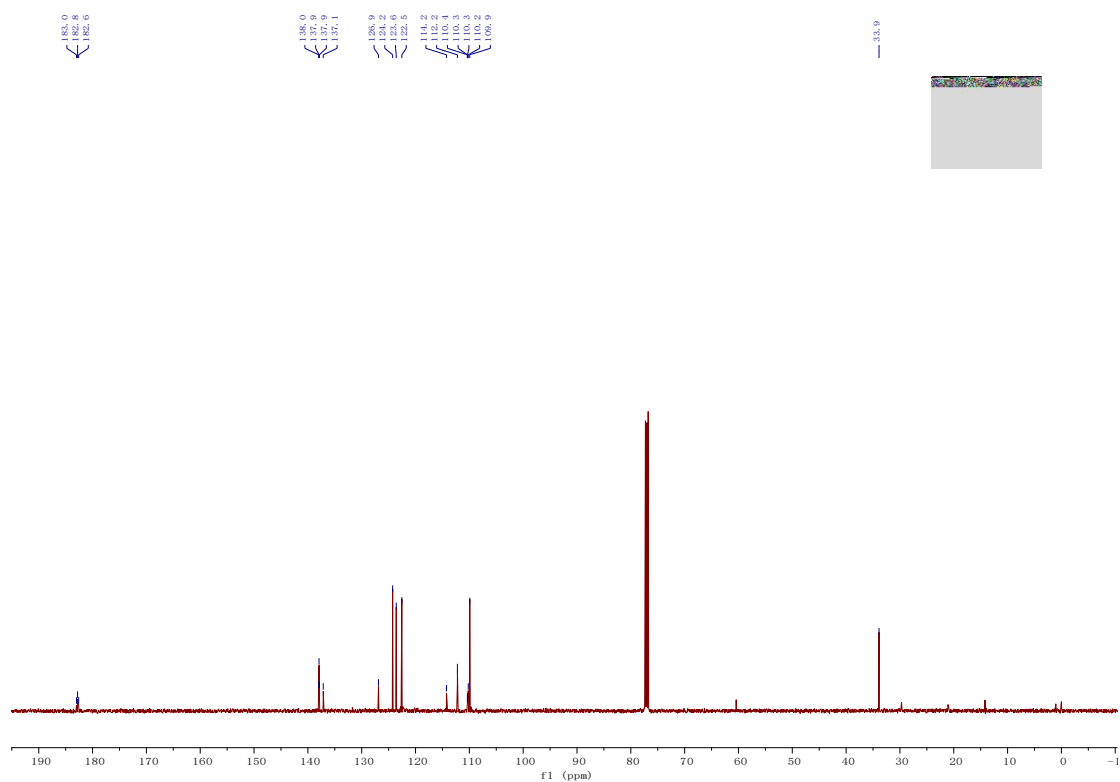

<sup>19</sup>F NMR (470 MHz, Chloroform-*d*) spectra of **9**

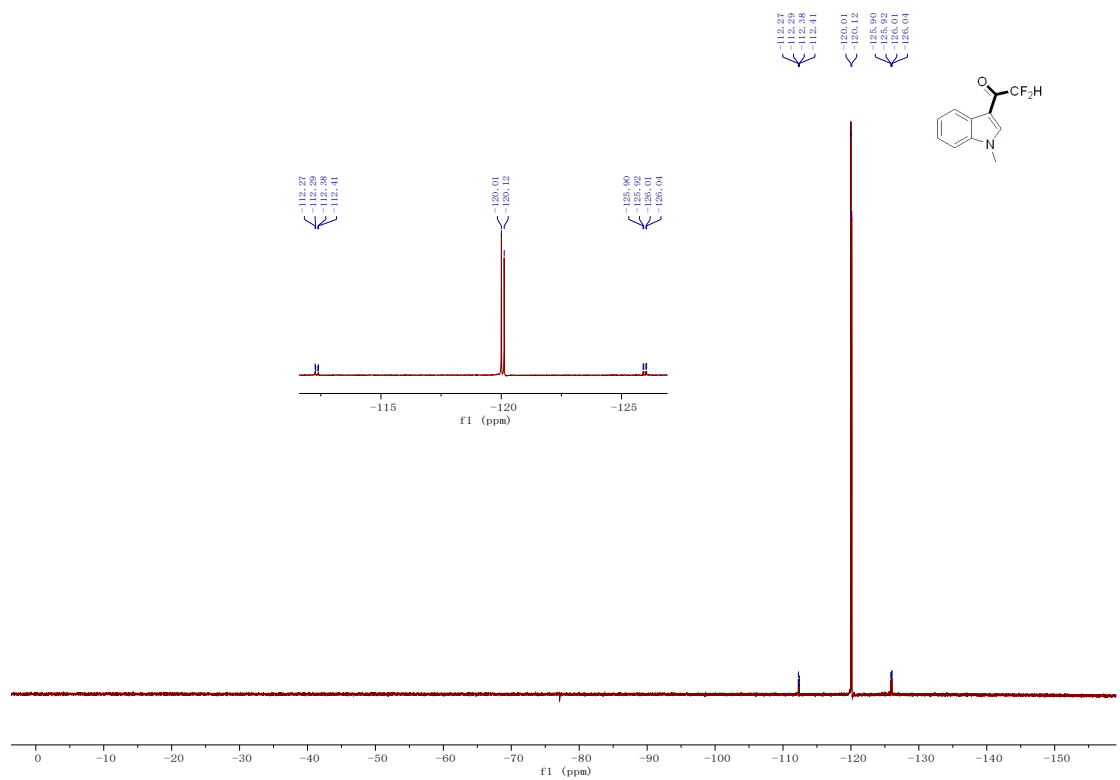

# <sup>1</sup>H NMR (500 MHz, Chloroform-*d*) spectra of **10**

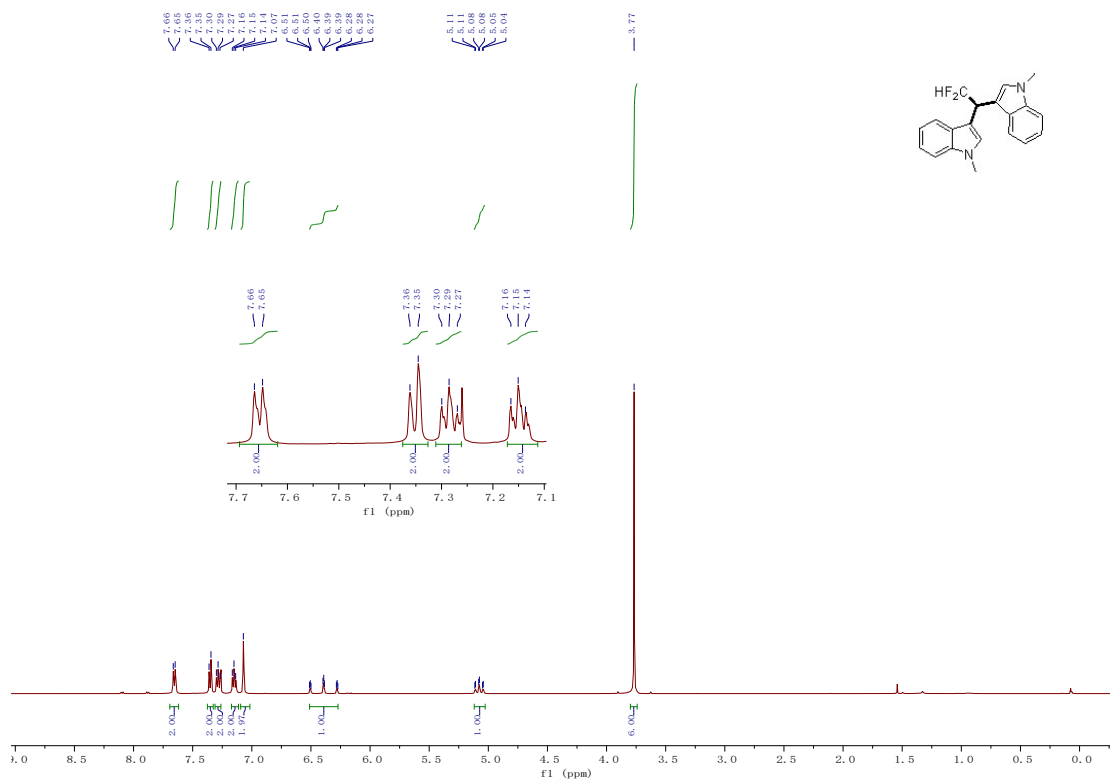

# <sup>13</sup>C NMR (125 MHz, Chloroform-*d*) spectra of **10**

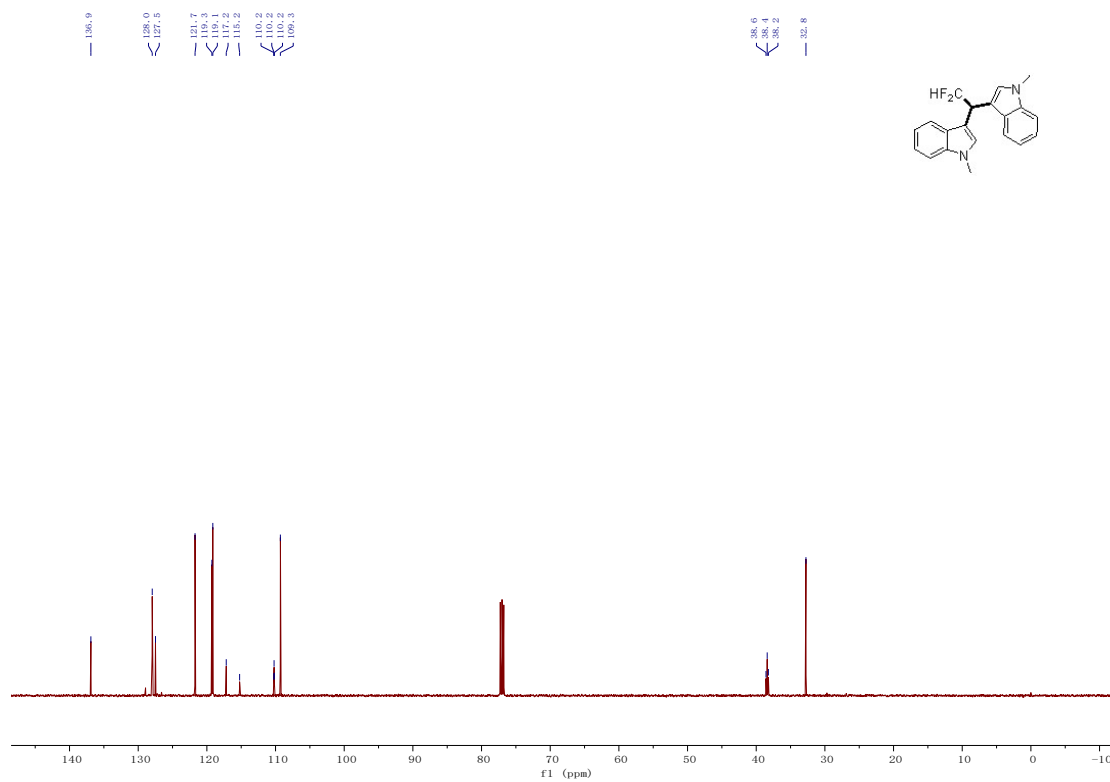

<sup>19</sup>F NMR (470 MHz, Chloroform-*d*) spectra of **10**

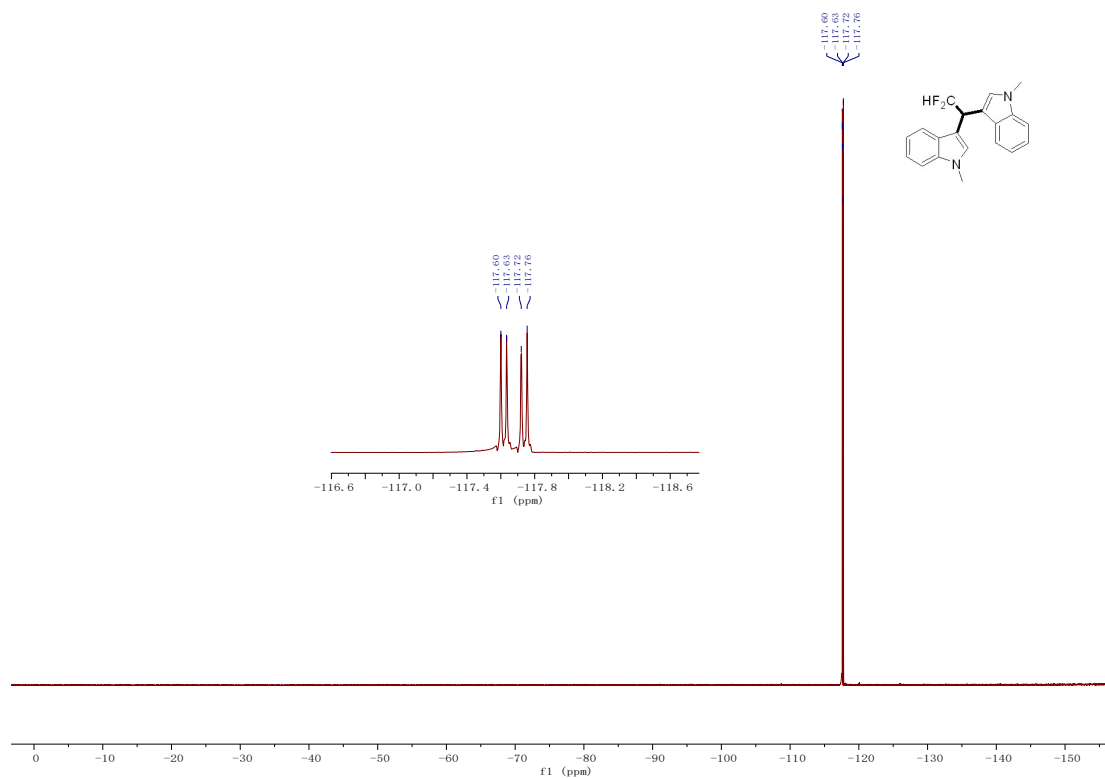

<sup>1</sup>H NMR (500 MHz, Chloroform-*d*) spectra of **11**

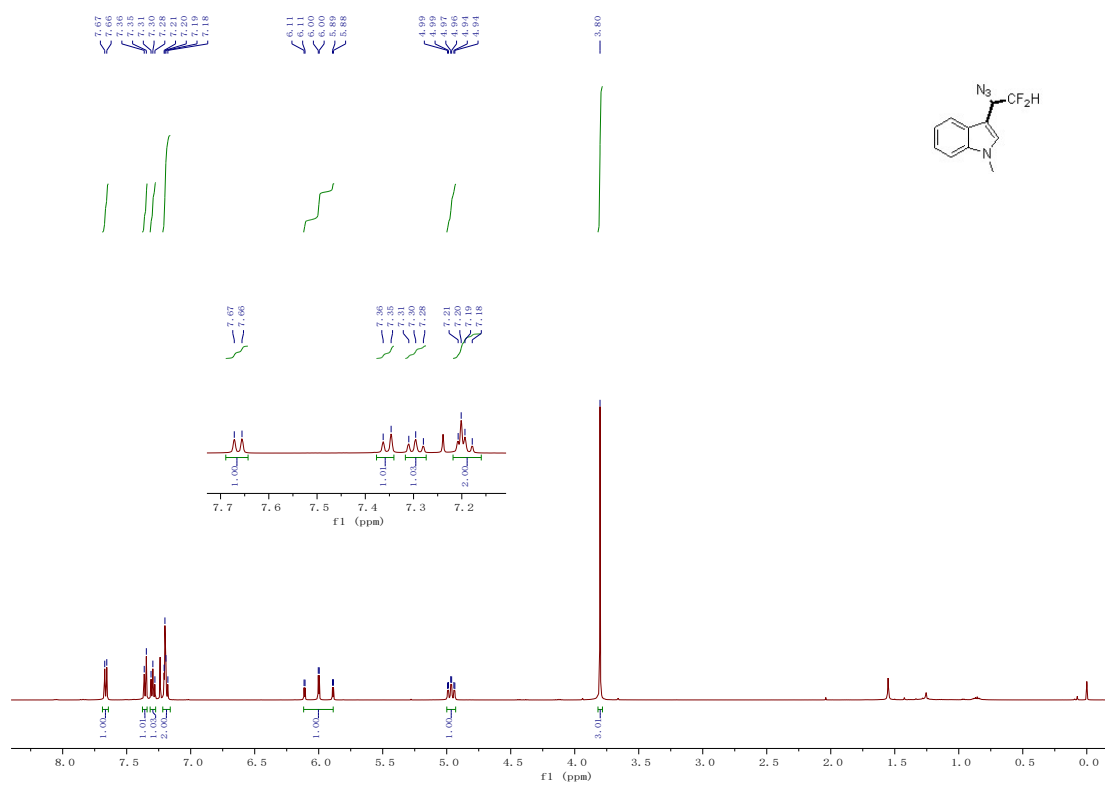

<sup>13</sup>C NMR (125 MHz, Chloroform-*d*) spectra of **11**

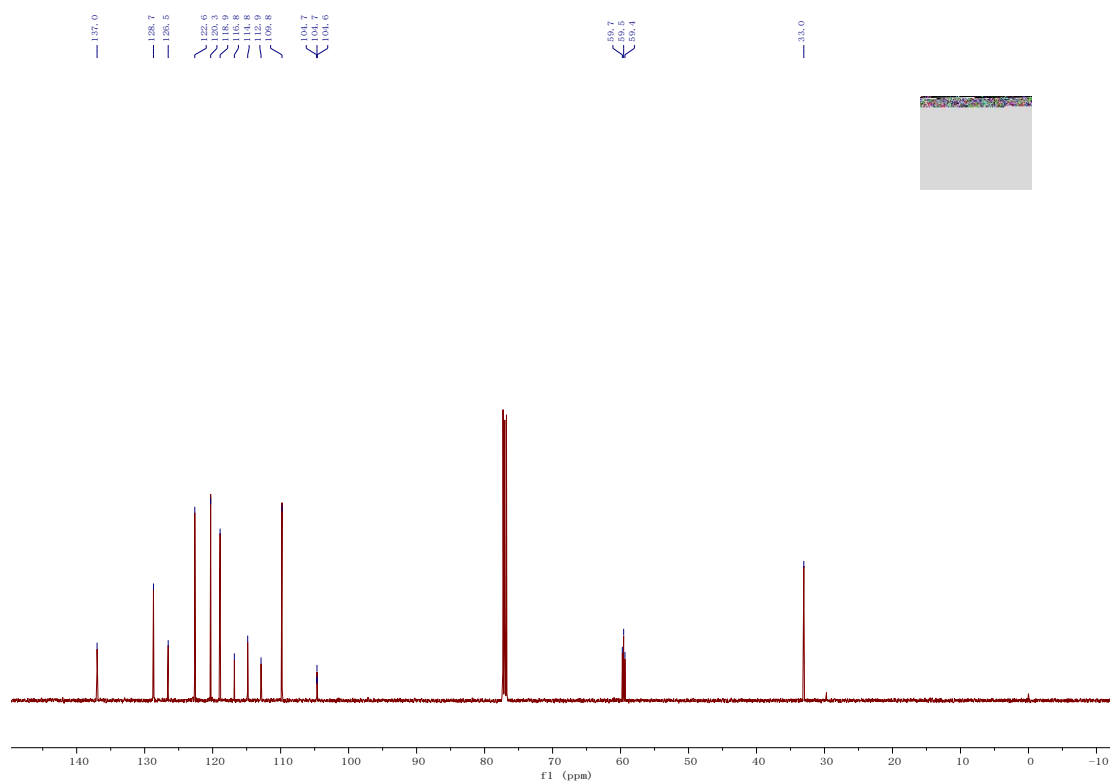

<sup>19</sup>F NMR (470 MHz, Chloroform-*d*) spectra of **11**

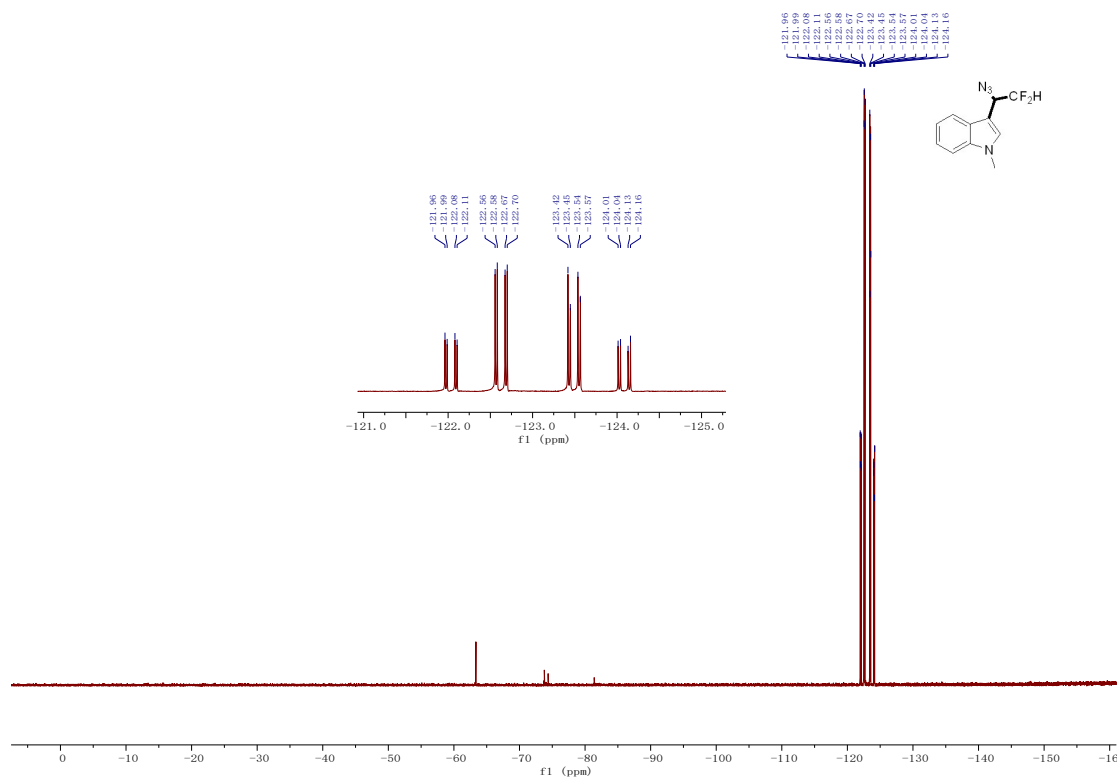

# <sup>1</sup>H NMR (500 MHz, Chloroform-*d*) spectra of 12

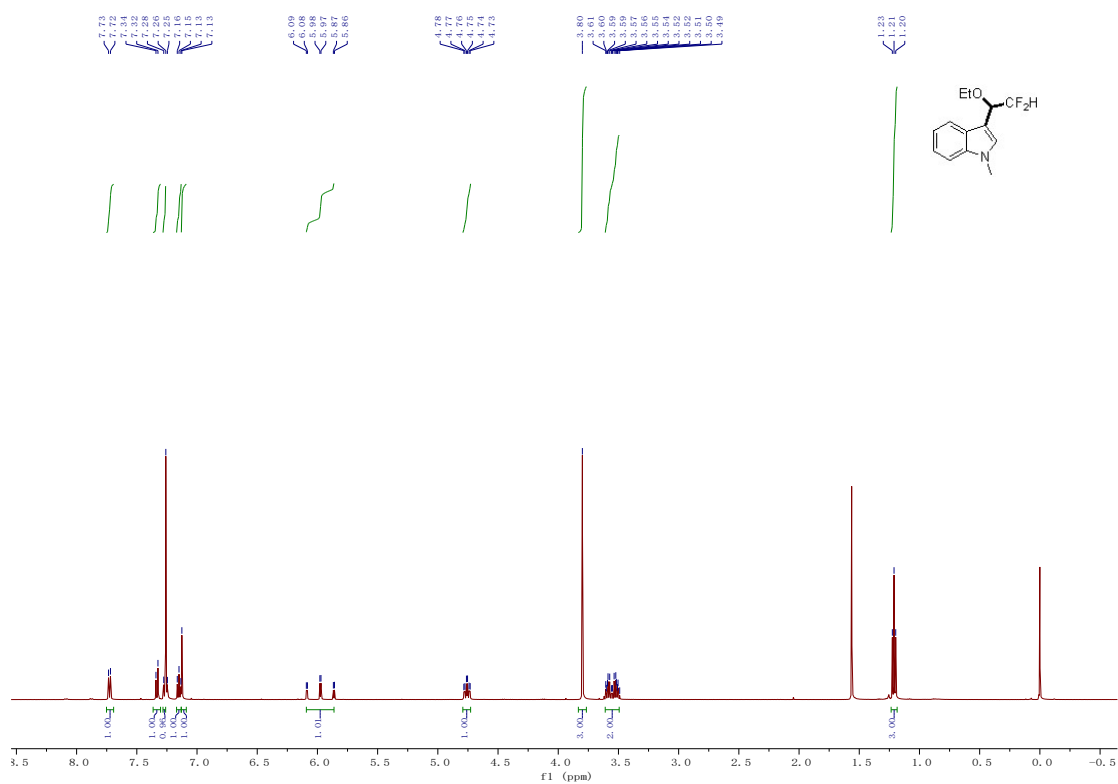

# <sup>13</sup>C NMR (125 MHz, Chloroform-*d*) spectra of 12

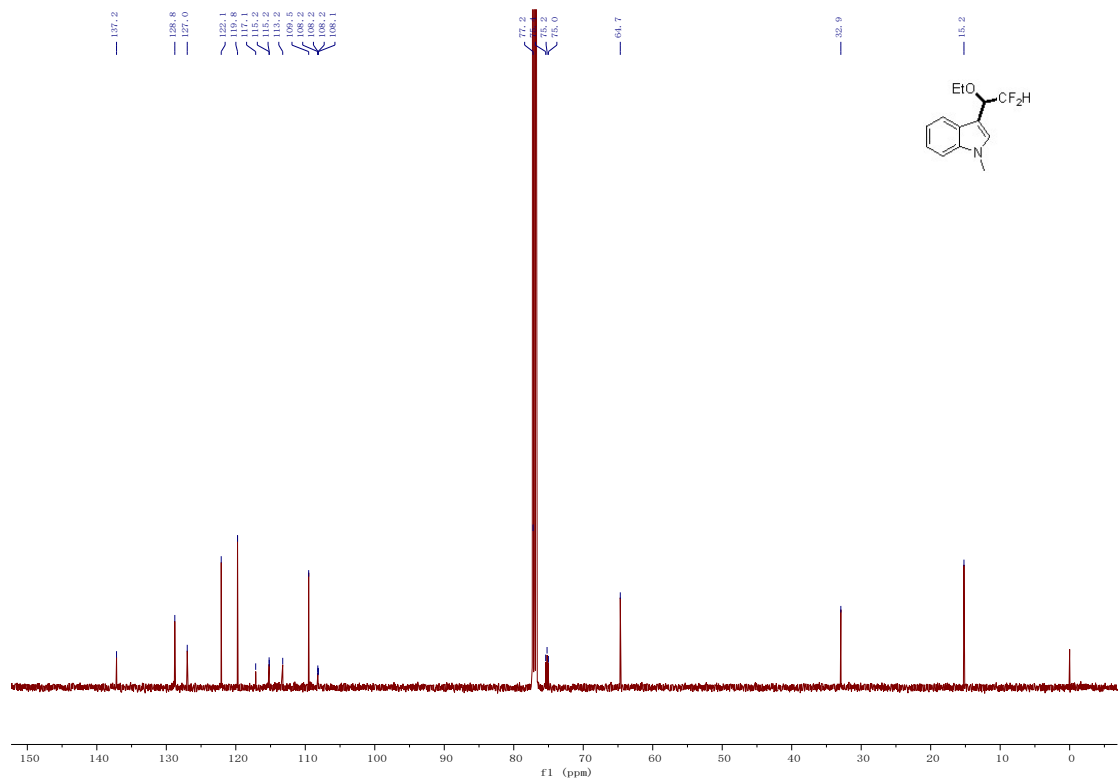

<sup>19</sup>F NMR (470 MHz, Chloroform-*d*) spectra of **12**

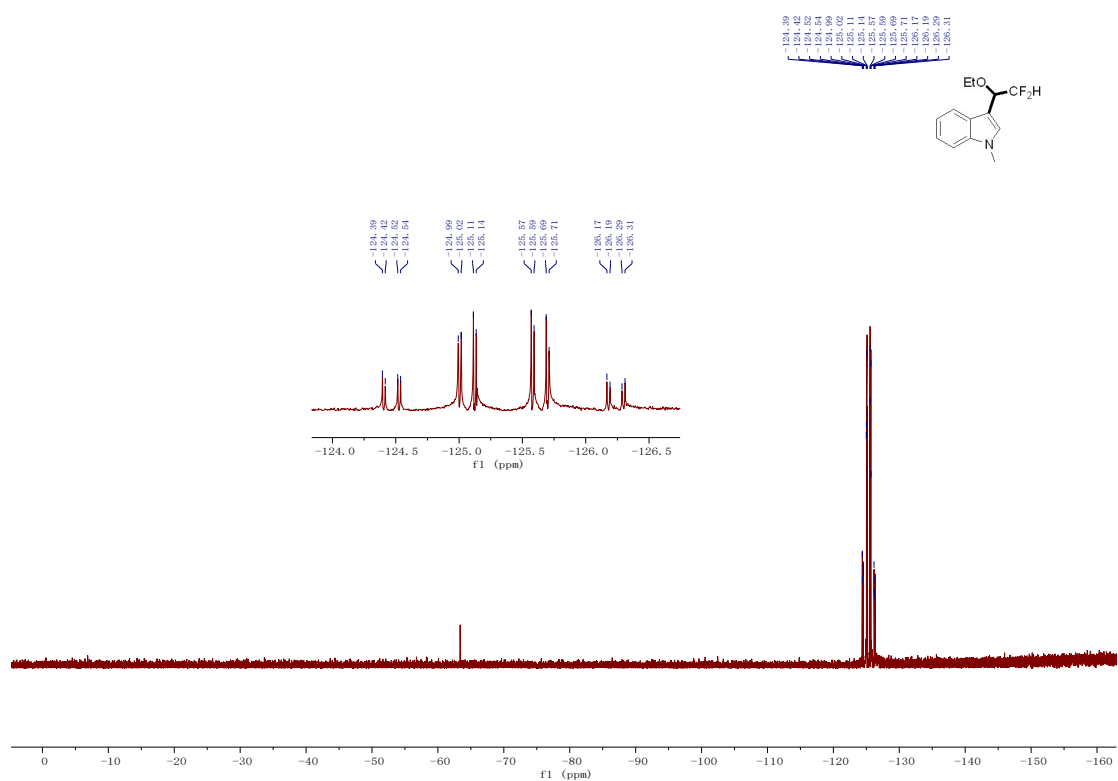

<sup>1</sup>H NMR (500 MHz, Chloroform-*d*) spectra of **13**

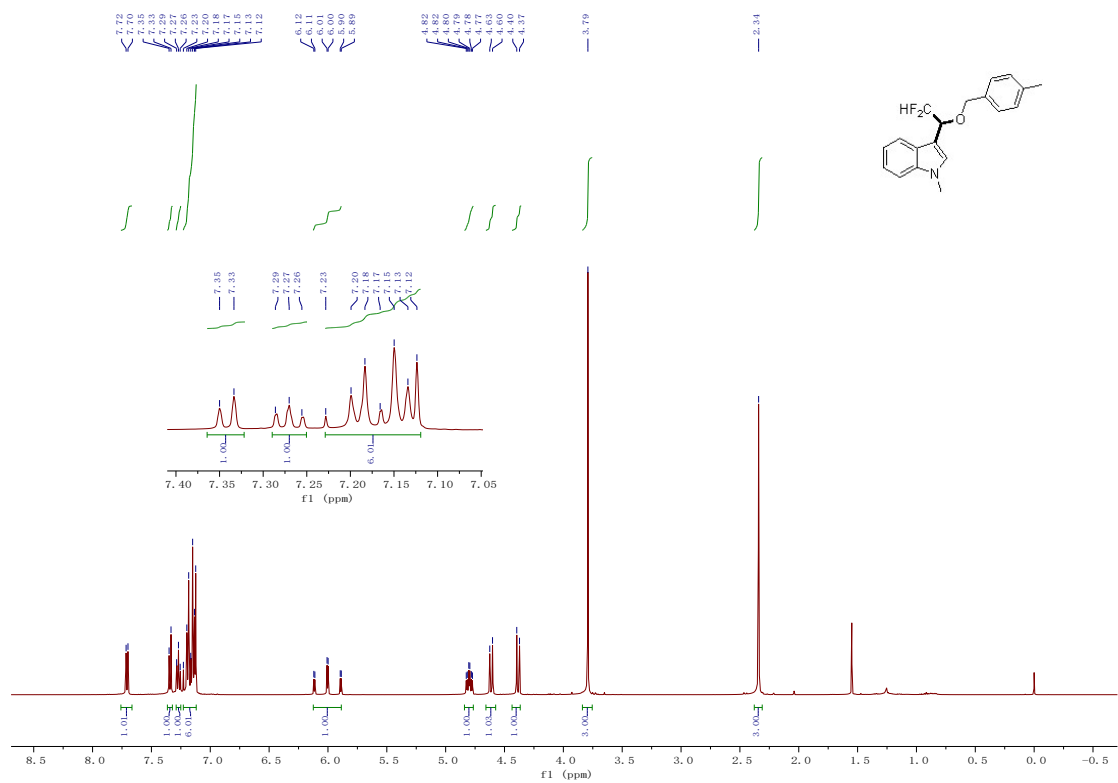

### <sup>13</sup>C NMR (125 MHz, Chloroform-*d*) spectra of **13**

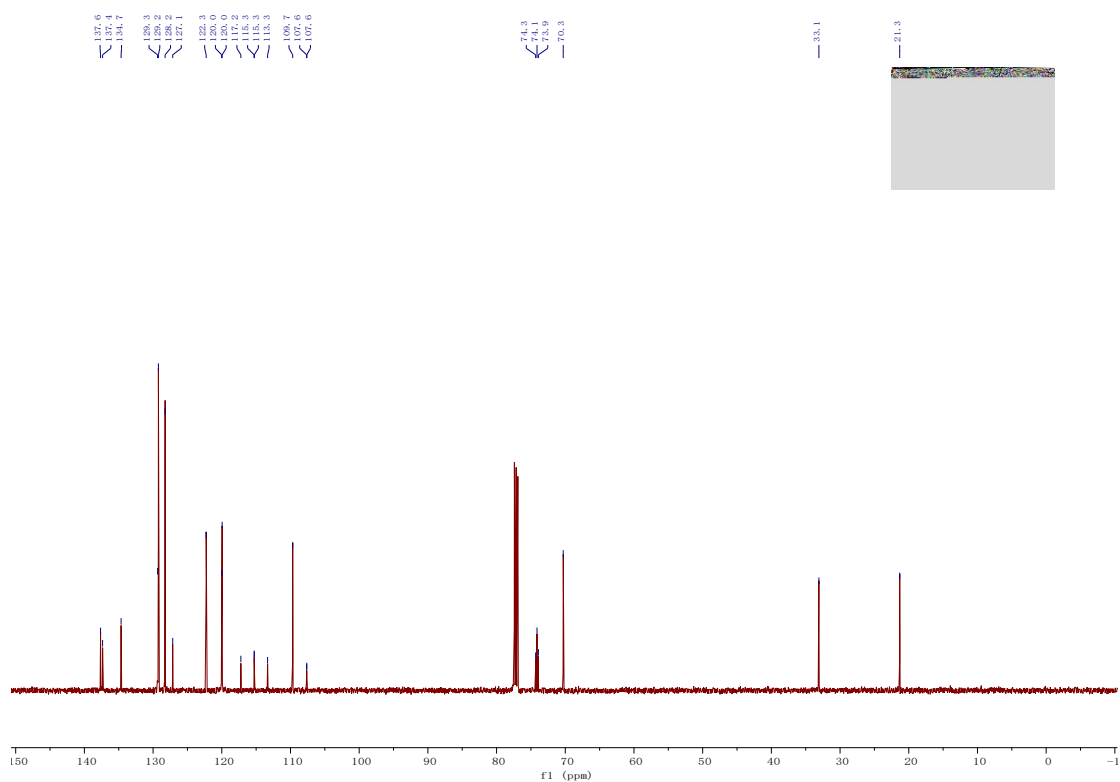

### <sup>19</sup>F NMR (470 MHz, Chloroform-*d*) spectra of **13**

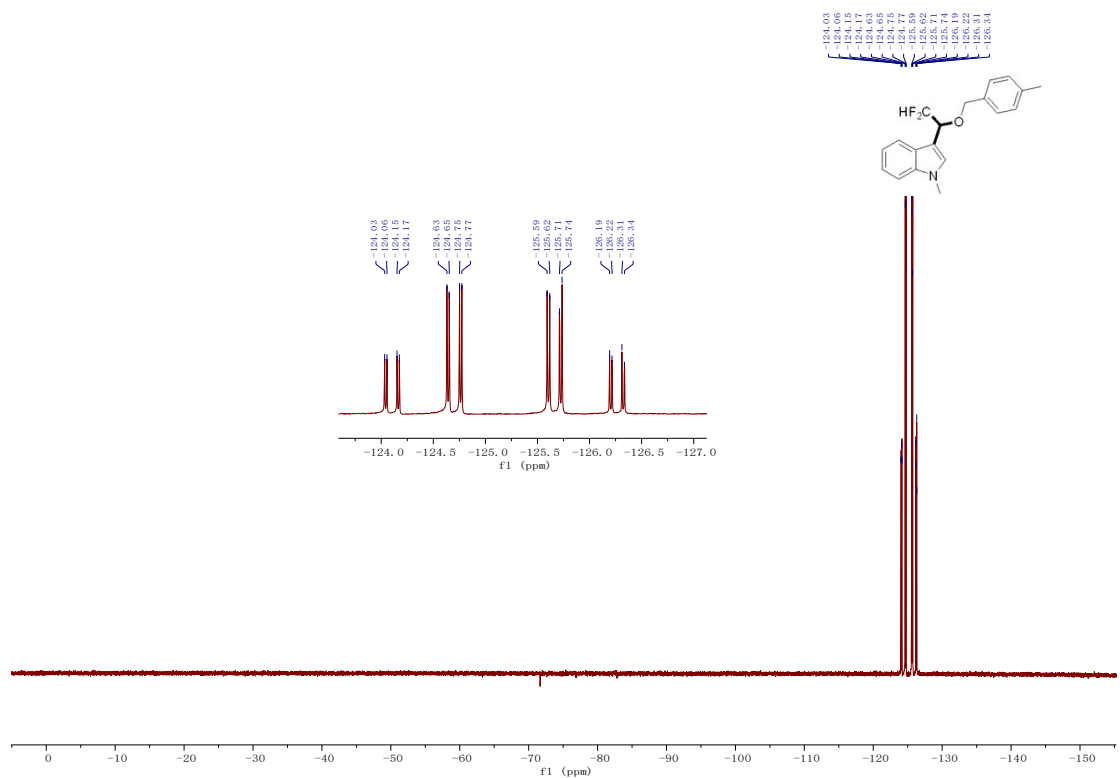

Supplement: d2qo01277d1.pdf [file d2qo01277d1.pdf]
